# Supplementary material for: Selective C–F bond carboxylation of gem-difluoroalkenes with CO2 by photoredox/palladium dual catalysis
Source: Royal Society of Chemistry journal article supplement (doi:10.1039/c9sc01336a), 2019-01-01

## Supporting Information

### Selective C–F Bond Carboxylation of *gem*-Difluoroalkenes with CO<sub>2</sub> by Photoredox/Palladium Dual Catalysis

Chuan Zhu<sup>+</sup>, Yu-Feng Zhang<sup>+</sup>, Ze-Yao Liu, Lu Zhou, Haidong Liu and Chao Feng\*

Institute of Advanced Synthesis (IAS), School of Chemistry and Molecular Engineering, Nanjing Tech University, 30 South Puzhu Road, Nanjing 211816, P. R. China

#### Table of Contents

|                                                                                 |     |
|---------------------------------------------------------------------------------|-----|
| 1. General information .....                                                    | S2  |
| 2. Procedure for the preparation of <i>gem</i> -difluoroalkenes .....           | S3  |
| 3. Optimization of reaction conditions .....                                    | S8  |
| 4. General procedure C-F bond carboxylation and spectral data of products ..... | S13 |
| 5. Mechanistic study .....                                                      | S23 |
| 6. References .....                                                             | S27 |
| 7. NMR spectra .....                                                            | S28 |

## 1. General information

All operations were performed under a nitrogen atmosphere unless otherwise specified.  $^1\text{H}$ ,  $^{13}\text{C}$  and  $^{19}\text{F}$ -NMR spectra were recorded on a Bruker 400 (400 MHz for  $^1\text{H}$ , 100 MHz for  $^{13}\text{C}$  and 376 MHz for  $^{19}\text{F}$ ) or a JEOL ECX-400 (400 MHz for  $^1\text{H}$ , 100 MHz for  $^{13}\text{C}$  and 376 MHz for  $^{19}\text{F}$ ) spectrometer using residue solvent as internal reference. Silica gel (200~300 mesh) was used for flash column chromatography. High resolution mass analyses (ESI+) were performed on a Waters mass spectrometer.

Reagents: Unless otherwise noted, commercial reagents were used as received. Dehydrated DMA was purchased from Energy®. THF, toluene, acetonitrile and dichloromethane were purified by Vigor® solvent purification system. Iridium photocatalysts<sup>[1-3]</sup> and *gem*-difluoroalkenes **1a**, **1e**,<sup>[4]</sup> **1f**, **1g**,<sup>[4]</sup> **1h**,<sup>[4]</sup> **1i**,<sup>[6]</sup> **1l**,<sup>[7]</sup> **1m**,<sup>[5]</sup> **1p**,<sup>[8]</sup> **1q**,<sup>[9]</sup> **1r**,<sup>[10]</sup> **1s**,<sup>[4]</sup> and compounds **4**<sup>[11]</sup> were prepared according to literature procedures.

### 1.1 Structure of *gem*-difluoroalkenes **1a-x**

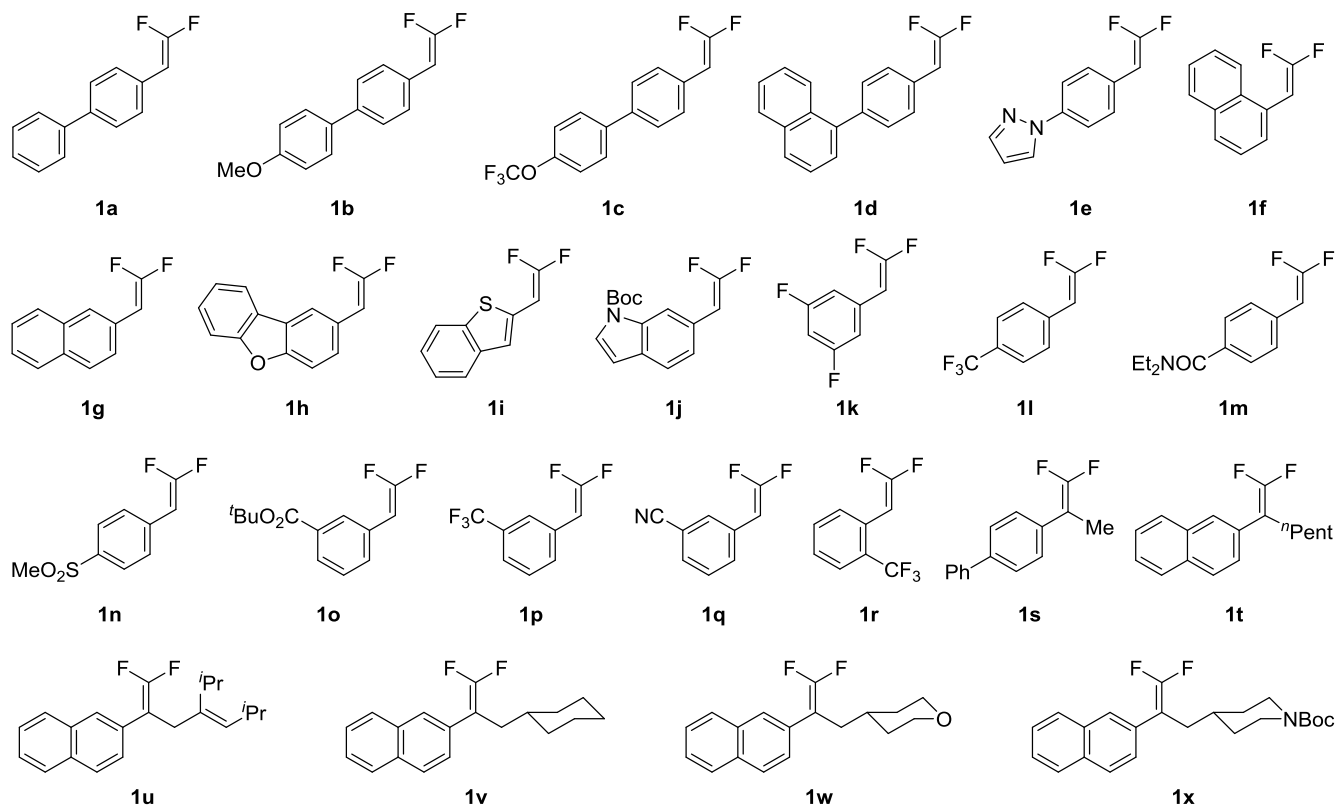

### 1.2 Unsuccessful *gem*-difluoroalkenes

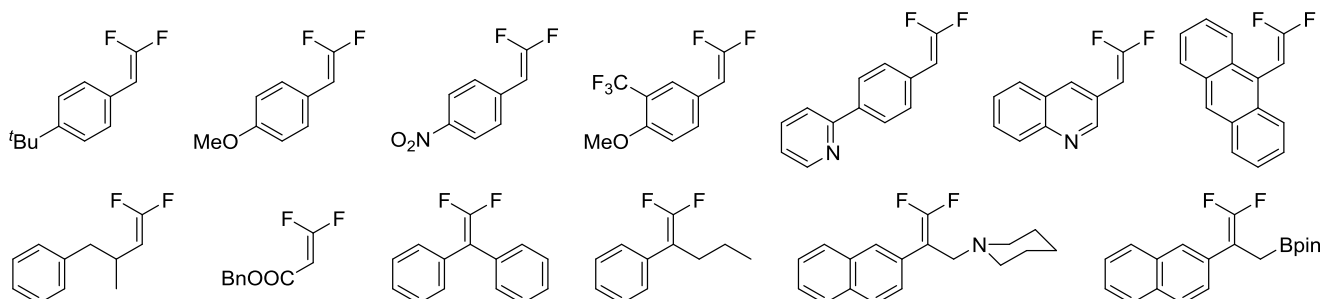

### 1.3 Unsuccessful carbonyl-like electrophiles

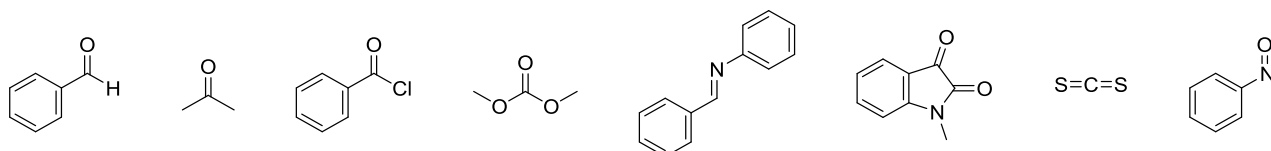

## 2. Procedure for the preparation of *gem*-difluoroalkenes

### Preparation of *gem*-difluoroalkene **1b**

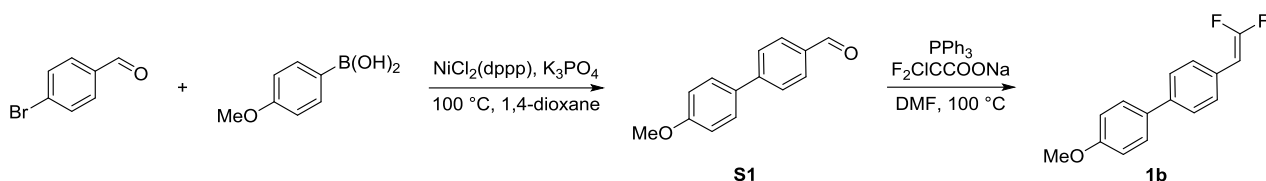

Step 1: Following the reported procedure, to an oven-dried 100 mL two-neck RBF equipped with condenser and stir bar was added 4-bromobenzaldehyde (1.8 g, 10 mmol, 1.0 equiv), 4-methoxyphenylboronic acid (2.3 g, 15 mmol, 1.5 equiv),  $\text{NiCl}_2(\text{dppp})$  (54 mg, 0.5 mmol), and  $\text{K}_3\text{PO}_4$  (6.4 g, 30 mmol, 3.0 equiv). The RBF was evacuated and filled with nitrogen (three cycles). To these solids 1,4-dioxane (50 mL) was added and the resulting mixture was stirred at  $100\text{ }^\circ\text{C}$  for 12 h. The reaction mixture was cooled to room temperature, diluted with ethyl acetate and filtered. The filtrate was concentrated under reduced pressure. The crude residue was purified by column chromatography on silica gel (petroleum ether/ethyl acetate = 20 : 1) to afford compound **S1** (1.9 g, 9.0 mmol) in 90% yield as white solid. The  $^1\text{H}$  NMR data is in accordance with the literature.<sup>[12]</sup>

Step 2 : A solution of **S1** (1.3 g, 6.1 mmol, 1.0 equiv) and  $\text{PPh}_3$  (3.2 g, 12 mmol, 2.0 equiv) in DMF (12 mL) was heated to  $100\text{ }^\circ\text{C}$ . To the reaction mixture at  $100\text{ }^\circ\text{C}$  was added  $\text{F}_2\text{CICCOONa}$  (1.9 g, 12 mmol, 2.0 equiv) slowly. After the reaction was completed according to the TLC (about 30 min), the reaction mixture was cooled to room temperature, quenched with water and extracted with ethyl acetate. The combined organic layers were washed with  $\text{H}_2\text{O}_2$  (30 wt% in water, 10 mL), brine and dried over  $\text{Na}_2\text{SO}_4$ . After the solvent was removed under reduced pressure, the residual mixture was purified by column chromatography on silica gel (petroleum ether/ethyl acetate = 20 : 1) to afford compound **1b** (1.1 g, 4.7 mmol) in 78% yield as white solid.  $^1\text{H}$  NMR (400 MHz,  $\text{CDCl}_3$ ):  $\delta$  = 7.54 (d,  $J$  = 8.6 Hz, 4H), 7.39 (d,  $J$  = 8.3 Hz, 2H), 6.99 (d,  $J$  = 8.8 Hz, 2H), 5.31 (dd,  $J$  = 26.4, 3.8 Hz, 1H), 3.86 (s, 3H).  $^{19}\text{F}$  NMR (376 MHz,  $\text{CDCl}_3$ ):  $\delta$  = -82.08 (dd,  $J$  = 31.3, 26.1 Hz), -84.07 (dd,  $J$  = 31.4, 4.0 Hz).  $^{13}\text{C}$  NMR (100 MHz,  $\text{CDCl}_3$ ):  $\delta$  = 159.2, 156.2 (dd,  $J$  = 298.3, 268.0 Hz), 139.4 (t,  $J$  = 2.2 Hz), 132.9, 128.7 (t,  $J$  = 6.4 Hz), 127.9, 127.9 (t,  $J$  = 5.2 Hz), 126.8, 114.2, 81.9 (dd,  $J$  = 29.1, 13.6 Hz), 55.3. HRMS (ESI,  $m/z$ ): calcd. for  $\text{C}_{15}\text{H}_{13}\text{F}_2\text{O}$  [ $\text{M}+\text{H}$ ] $^+$ : 247.0934, found: 247.0929.

### Preparation of *gem*-difluoroalkene **1c**

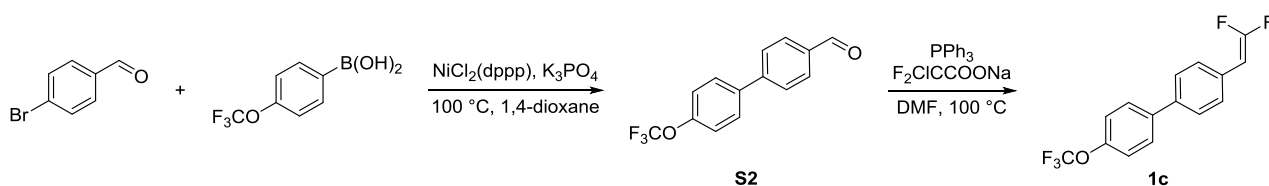

Step 1: To an oven-dried 100 mL two-neck RBF equipped with condenser and stir bar was added 4-bromobenzaldehyde (0.93 g, 5.0 mmol, 1.0 equiv), 4-trifluoromethoxyphenylboronic acid (1.5 g, 7.5 mmol, 1.5 equiv),  $\text{NiCl}_2(\text{dppp})$  (27 mg, 0.25 mmol), and  $\text{K}_3\text{PO}_4$  (3.2 g, 15 mmol, 3.0 equiv). The RBF was evacuated and filled with nitrogen (three cycles). To these solids 1,4-dioxane (25 mL) was added and the resulting mixture was stirred at  $100\text{ }^\circ\text{C}$  for 12 h. The reaction mixture was cooled to room temperature, diluted with ethyl acetate and filtered. The filtrate was concentrated under reduced pressure. The crude residue was purified by column chromatography on silica gel (petroleum ether/ethyl acetate = 10 : 1) to afford compound **S2** (1.0 g, 3.8 mmol) in 76% yield as white solid. The  $^1\text{H}$  NMR data is in accordance with the literature.<sup>[13]</sup>

Step 2 : A solution of **S2** (1.0 g, 3.8 mmol, 1.0 equiv) and  $\text{PPh}_3$  (2.0 g, 7.6 mmol, 2.0 equiv) in DMF (8 mL) was heated to  $100\text{ }^\circ\text{C}$ . To the reaction mixture at  $100\text{ }^\circ\text{C}$  was added  $\text{F}_2\text{CICCOONa}$  (1.2 g, 7.6 mmol, 2.0 equiv) slowly. After the reaction

was completed according to the TLC (about 30 min), the reaction mixture was cooled to room temperature, quenched with water and extracted with ethyl acetate. The combined organic layers were washed with H<sub>2</sub>O<sub>2</sub> (30 wt% in water, 5 mL), brine and dried over Na<sub>2</sub>SO<sub>4</sub>. After the solvent was removed under reduced pressure, the residual mixture was purified by column chromatography on silica gel (petroleum ether/ethyl acetate = 20 : 1) to afford compound **1b** (0.8 g, 2.7 mmol) in 70% yield as white solid. <sup>1</sup>H NMR (400 MHz, CDCl<sub>3</sub>): δ = 7.60 (d, *J* = 8.7 Hz, 2H), 7.54 (d, *J* = 8.4 Hz, 2H), 7.42 (d, *J* = 8.3 Hz, 2H), 7.29 (d, *J* = 8.4 Hz, 2H), 5.33 (dd, *J* = 26.2, 3.7 Hz, 1H). <sup>19</sup>F NMR (376 MHz, CDCl<sub>3</sub>): δ = -57.82 (s, 3F), -81.52 (dd, *J* = 29.8, 26.1 Hz, 1F), -83.39 (dd, *J* = 29.5, 3.5 Hz, 1F). <sup>13</sup>C NMR (100 MHz, CDCl<sub>3</sub>): δ = 156.4 (dd, *J* = 298.7, 288.9 Hz), 148.7 (d, *J* = 2.0 Hz), 139.2, 138.3 (dd, *J* = 2.1, 2.1 Hz), 129.8 (dd, *J* = 6.5, 6.5 Hz), 128.2, 128.1 (dd, *J* = 6.4, 3.6 Hz), 127.3, 121.3, 120.5 (q, *J* = 257.1 Hz), 81.8 (dd, *J* = 29.3, 13.6 Hz). HRMS (ESI, *m/z*): calcd. for C<sub>15</sub>H<sub>10</sub>F<sub>5</sub>O [M+H]<sup>+</sup>: 301.0652, found: 301.0645.

#### Preparation of compound **1d**

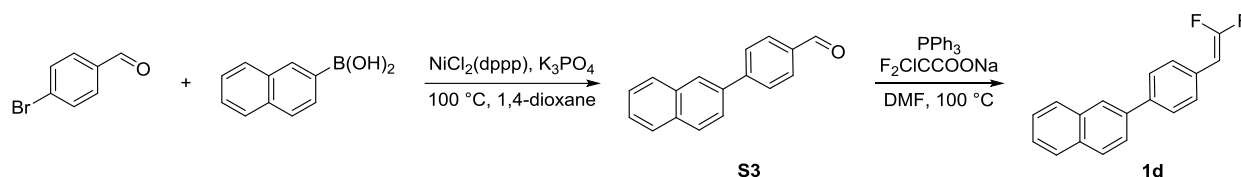

Step 1: To an oven-dried 100 mL two-neck RBF equipped with condenser and stir bar was added 4-bromobenzaldehyde (1.8 g, 10 mmol, 1.0 equiv), 4-methoxyphenylboronic acid (2.3 g, 15 mmol, 1.5 equiv), NiCl<sub>2</sub>(dppp) (54 mg, 0.5 mmol), and K<sub>3</sub>PO<sub>4</sub> (6.4 g, 30 mmol, 3.0 equiv). The RBF was evacuated and filled with nitrogen (three cycles). To these solids 1,4-dioxane (50 mL) was added and the resulting mixture was stirred at 100 °C for 12 h. The reaction mixture was cooled to room temperature, diluted with ethyl acetate and filtered. The filtrate was concentrated under reduced pressure. The crude residue was purified by column chromatography on silica gel (petroleum ether/ethyl acetate = 10 : 1) to afford compound **S3** (2.0 g, 8.7 mmol) in 87% yield as white solid. The <sup>1</sup>H NMR data is in accordance with the literature.<sup>[14]</sup>

Step 2 : A solution of **S1** (0.9 g, 4.0 mmol, 1.0 equiv) and PPh<sub>3</sub> (2.1 g, 8.0 mmol, 2.0 equiv) in DMF (8 mL) was heated to 100 °C. To the reaction mixture at 100 °C was added F<sub>2</sub>ClCCOONa (1.2 g, 8.0 mmol, 2.0 equiv) slowly. After the reaction was completed according to the TLC (about 30 min), the reaction mixture was cooled to room temperature, quenched with water and extracted with ethyl acetate. The combined organic layers were washed with H<sub>2</sub>O<sub>2</sub> (30 wt% in water, 5 mL), brine and dried over Na<sub>2</sub>SO<sub>4</sub>. After the solvent was removed under reduced pressure, the residual mixture was purified by column chromatography on silica gel (petroleum ether/ethyl acetate = 10 : 1) to afford compound **1b** (0.6 g, 2.3 mmol) in 56% yield as white solid. <sup>1</sup>H NMR (400 MHz, CDCl<sub>3</sub>): δ = 7.88 (d, *J* = 1.7 Hz, 1H), 7.78-7.67 (m, 3H), 7.57 (dd, *J* = 8.5, 1.9 Hz, 1H), 7.53 (d, *J* = 8.3 Hz, 2H), 7.39-7.30 (m, 2H), 7.27 (d, *J* = 8.3 Hz, 2H), 5.16 (dd, *J* = 26.4, 3.7 Hz, 1H). <sup>19</sup>F NMR (376 MHz, CDCl<sub>3</sub>): δ = -81.66 (dd, *J* = 30.3, 26.3 Hz), -83.62 (dd, *J* = 30.3, 3.7 Hz). <sup>13</sup>C NMR (100 MHz, CDCl<sub>3</sub>): δ = 156.3 (dd, *J* = 298.6, 288.6 Hz), 139.6 (t, *J* = 2.2 Hz), 137.7, 133.6, 132.6, 129.4 (dd, *J* = 6.4, 6.4 Hz), 128.5, 128.2, 128.0 (dd, *J* = 6.3, 3.7 Hz), 127.6, 127.5, 126.3, 126.0, 125.5, 125.2, 81.9 (dd, *J* = 29.2, 13.5 Hz). HRMS (ESI, *m/z*): calcd. for C<sub>18</sub>H<sub>13</sub>F<sub>2</sub> [M+H]<sup>+</sup>: 267.0985, found: 267.0993.

#### Preparation of compound **1j**

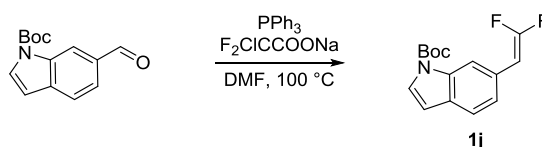

A solution of *tert*-butyl 6-formyl-1*H*-indole-1-carboxylate (1.2 g, 5.0 mmol, 1.0 equiv) and PPh<sub>3</sub> (2.6 g, 10 mmol, 2.0 equiv) in DMF (20 mL) was heated to 100 °C. To the reaction mixture at 100 °C was added F<sub>2</sub>CICCOONa (1.5 g, 10 mmol, 2.0 equiv) slowly. After the reaction finished according to the TLC (about 30 min), the reaction mixture was cooled to room temperature, quenched with water (100 mL) and extracted with ethyl acetate (20 mL × 3). The combined organic layers were washed with H<sub>2</sub>O<sub>2</sub> (30 wt% in water, 20 mL), brine and dried over Na<sub>2</sub>SO<sub>4</sub>. After solvent was removed under reduced pressure, the residual mixture was purified by column chromatography on silica gel (petroleum ether/ethyl acetate = 20 : 1) to afford **1j** (838 mg, 3.0 mmol) in 60% yield as white solid. **<sup>1</sup>H NMR (400 MHz, CDCl<sub>3</sub>):** δ = 8.19 (s, 1H), 7.60 (d, *J* = 3.7 Hz, 1H), 7.51 (d, *J* = 8.2 Hz, 1H), 7.20 (d, *J* = 8.3 Hz, 1H), 6.54 (d, *J* = 3.6 Hz, 1H), 5.40 (dd, *J* = 26.2, 4.0 Hz, 1H), 1.69 (s, 9H). **<sup>19</sup>F NMR (376 MHz, CDCl<sub>3</sub>):** δ = -82.96 (dd, *J* = 33.7, 26.2 Hz, 1F), -85.07 (dd, *J* = 34.0, 4.2 Hz, 1F). **<sup>13</sup>C NMR (100 MHz, CDCl<sub>3</sub>):** δ = 156.0 (dd, *J* = 297.5, 287.0 Hz), 149.7, 135.4, 129.6, 126.5, 126.3 (dd, *J* = 12.8, 6.5 Hz), 122.5 (dd, *J* = 6.1, 3.4 Hz), 121.0, 114.3 (dd, *J* = 7.4, 3.8 Hz), 107.1, 83.9, 82.9 (dd, *J* = 29.4, 13.5 Hz), 28.1. **HRMS (ESI, m/z):** calcd. for C<sub>15</sub>H<sub>16</sub>F<sub>2</sub>NO<sub>2</sub> [M+H]<sup>+</sup>: 280.1149, found: 280.1158.

#### Preparation of compound **1k**

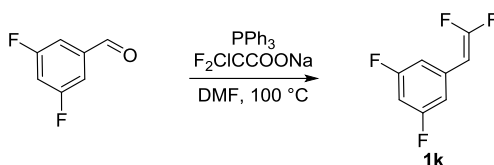

A solution of 3,5-difluorobenzaldehyde (2.8 g, 20 mmol, 1.0 equiv) and PPh<sub>3</sub> (6.3 g, 24 mmol, 1.2 equiv) in DMF (40 mL) was heated to 100 °C. To the reaction mixture at 100 °C was added F<sub>2</sub>CICCOONa (4.6 g, 30 mmol, 1.5 equiv) slowly. After the reaction finished according to the TLC (about 30 min), the reaction mixture was cooled to room temperature, quenched with water (200 mL) and extracted with Et<sub>2</sub>O (40 mL × 3). The combined organic layers were washed with H<sub>2</sub>O<sub>2</sub> (30 wt% in water, 20 mL), brine and dried over Na<sub>2</sub>SO<sub>4</sub>. After solvent was removed under reduced pressure, the residual mixture was purified by column chromatography on silica gel (petroleum ether) to afford **1k** (0.95 g, 5.4 mmol) in 27% yield as colorless liquid. **<sup>1</sup>H NMR (400 MHz, CDCl<sub>3</sub>):** δ = 7.04 – 6.77 (m, 2H), 6.69 (tt, *J* = 8.9, 2.3 Hz, 1H), 5.24 (dd, *J* = 25.1, 3.3 Hz, 1H). **<sup>19</sup>F NMR (376 MHz, CDCl<sub>3</sub>):** δ = -78.73 (dd, *J* = 24.7, 24.7 Hz), -81.26 – -81.38 (m), -109.73 – -109.85 (m). **<sup>13</sup>C NMR (100 MHz, CDCl<sub>3</sub>):** δ = 163.1 (dd, *J* = 247.6, 13.3 Hz), 156.8 (dd, *J* = 300.1, 290.7 Hz), 134.3 – 133.0 (m), 110.8 – 110.0 (m), 102.5 (ddd, *J* = 27.4, 25.4, 1.9 Hz), 81.5 (dddd, *J* = 31.0, 12.9, 3.0, 3.0 Hz). **HRMS (ESI, m/z):** calcd. for C<sub>9</sub>H<sub>9</sub>F<sub>2</sub>O<sub>2</sub>S [M+H]<sup>+</sup>: 219.0291, found: 219.0285.

#### Preparation of compound **1n**

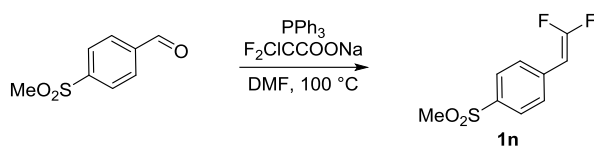

A solution of 4-(methylsulfonyl)benzaldehyde (1.5 g, 10 mmol, 1.0 equiv) and PPh<sub>3</sub> (2.6 g, 10 mmol, 2.0 equiv) in DMF (20 mL) was heated to 100 °C. To the reaction mixture at 100 °C was added F<sub>2</sub>CICCOONa (1.5 g, 10 mmol, 2.0 equiv) slowly. After the reaction finished according to the TLC (about 30 min), the reaction mixture was cooled to room temperature, quenched with water (100 mL) and extracted with ethyl acetate (20 mL × 3). The combined organic layers were washed with H<sub>2</sub>O<sub>2</sub> (30 wt% in water, 5 mL), brine and dried over Na<sub>2</sub>SO<sub>4</sub>. After solvent was removed under reduced pressure, the residual mixture was purified by column chromatography on silica gel (petroleum ether/ethyl acetate = 20 : 1) to afford **1n** (1.0 g, 4.4 mmol) in 44% yield as white solid. **<sup>1</sup>H NMR (400 MHz, CDCl<sub>3</sub>):** δ = 7.88 (d, *J* = 8.5 Hz, 2H), 7.50 (d, *J* = 8.5 Hz, 2H), 5.37 (dd, *J* = 25.6, 3.4 Hz, 1H), 3.04 (s, 3H). **<sup>19</sup>F NMR (376 MHz, CDCl<sub>3</sub>):** δ = -77.89 (dd, *J* = 25.4, 20.5 Hz), -79.45 (dd, *J* =

20.5, 3.4 Hz).  $^{13}\text{C}$  NMR (100 MHz,  $\text{CDCl}_3$ ):  $\delta = 157.0$  (dd,  $J = 301.2, 292.1$  Hz), 138.6 (t,  $J = 2.3$  Hz), 136.2 (dd,  $J = 7.7, 6.3$  Hz), 128.2 (dd,  $J = 6.9, 3.6$  Hz), 127.7, 81.6 (dd,  $J = 30.4, 12.8$  Hz), 44.4. HRMS (ESI,  $m/z$ ): calcd. for  $\text{C}_9\text{H}_9\text{F}_2\text{O}_2\text{S}$   $[\text{M}+\text{H}]^+$ : 219.0291, found: 219.0285.

#### Preparation of compound **1o**

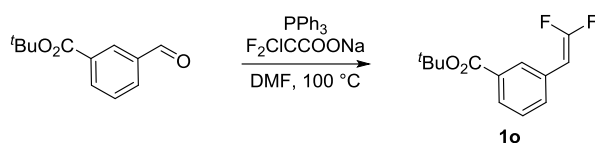

A solution of *tert*-butyl 3-formylbenzoate (0.93 g, 4.5 mmol, 1.0 equiv) and  $\text{PPh}_3$  (1.4 g, 5.4 mmol, 1.2 equiv) in DMF (10 mL) was heated to 100 °C. To the reaction mixture at 100 °C was added  $\text{F}_2\text{CICCOONa}$  (1.0 g, 6.75 mmol, 1.5 equiv) slowly. After the reaction finished according to the TLC (about 30 min), the reaction mixture was cooled to room temperature, quenched with water (50 mL) and extracted with ethyl acetate (10 mL  $\times$  3). The combined organic layers were washed with  $\text{H}_2\text{O}_2$  (30 wt% in water, 10 mL), brine and dried over  $\text{Na}_2\text{SO}_4$ . After solvent was removed under reduced pressure, the residual mixture was purified by column chromatography on silica gel (petroleum ether/ethyl acetate = 20 : 1) to afford **1o** (0.55 g, 2.3 mmol) in 50% yield as white solid.  $^1\text{H}$  NMR (400 MHz,  $\text{CDCl}_3$ ):  $\delta = 7.93$  (dd,  $J = 1.8, 1.8$  Hz, 1H), 7.86 (ddd,  $J = 7.7, 1.5, 1.5$  Hz, 1H), 7.56 – 7.46 (m, 1H), 7.38 (t,  $J = 7.8$  Hz, 1H), 5.32 (dd,  $J = 26.0, 3.6$  Hz, 1H), 1.60 (s, 9H).  $^{19}\text{F}$  NMR (376 MHz,  $\text{CDCl}_3$ ):  $\delta = -81.27$  (dd,  $J = 29.2, 25.9$  Hz),  $-83.15$  (dd,  $J = 29.0, 3.7$  Hz).  $^{13}\text{C}$  NMR (100 MHz,  $\text{CDCl}_3$ ):  $\delta = 165.4, 156.4$  (dd,  $J = 298.8, 289.0$  Hz), 132.4, 131.2 (dd,  $J = 6.9, 3.3$  Hz), 130.5 (dd,  $J = 7.3, 5.9$  Hz), 128.6 (dd,  $J = 5.8, 3.8$  Hz), 128.6, 127.9 (dd,  $J = 1.9, 1.9$  Hz), 81.7 (dd,  $J = 29.6, 13.4$  Hz), 81.2, 28.1. HRMS (ESI,  $m/z$ ): calcd. for  $\text{C}_9\text{H}_9\text{F}_2\text{O}_2\text{S}$   $[\text{M}+\text{H}]^+$ : 219.0291, found: 219.0285.

#### Preparation of compound **1t**<sup>[15]</sup>

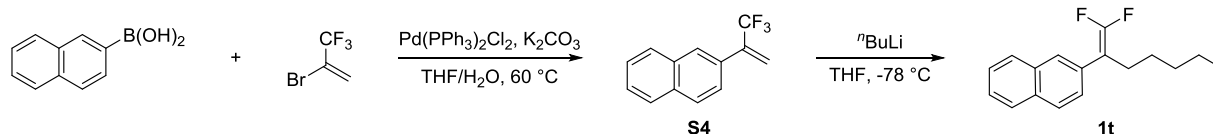

Step1:  $\text{Pd}(\text{PPh}_3)_2\text{Cl}_2$  (70 mg, 0.1 mmol),  $\text{K}_2\text{CO}_3$  (5.52 g, 40 mmol) and naphthalen-2-ylboronic acid (1.72 g, 10 mmol) were added to a Schlenk tube equipped with a stir bar. The Schlenk tube was evacuated and filled with nitrogen (three cycles). To these solids, THF (30 mL),  $\text{H}_2\text{O}$  (20 mL) and 2-bromo-3,3,3-trifluoroprop-1-ene (3.50 g, 20 mmol) were added under nitrogen atmosphere. The reaction mixture was stirred at reflux for 24 h. Next, the reaction mixture was quenched by adding saturated aqueous  $\text{NH}_4\text{Cl}$  (20 mL) and extracted with ethyl acetate (15 mL  $\times$  3). The combined organic layers were washed with brine (20 mL), dried over anhydrous  $\text{Na}_2\text{SO}_4$ , filtered and concentrated under reduced pressure. The crude residue was purified by column chromatography on silica gel (petroleum ether/ethyl acetate = 50 : 1) to afford **S4** (2.0 g, 9.0 mmol) in 90% yield as white solid. The  $^1\text{H}$  NMR data is in accordance with the literature.<sup>[16]</sup>

Step 2: A solution of **S4** (222 mg, 1.0 mmol) in THF (10 mL) was cooled to  $-78$  °C. To the mixture at  $-78$  °C was added  $n\text{BuLi}$  (0.75 mL, 1.2 mmol, 1.6 mol/L THF solution) slowly. After stirring at  $-78$  °C for 1 h, the reaction mixture was quenched with by adding water (5 mL) and extracted with ethyl acetate (10 mL  $\times$  3). The combined organic layers were washed with brine (10 mL) and dried over  $\text{Na}_2\text{SO}_4$ . After solvent was removed under reduced pressure, the residual mixture was purified by column chromatography on silica gel (petroleum ether/ethyl acetate = 50 : 1) to afford **1t** (0.17 g, 0.65 mmol) in 65% yield as colorless oil.  $^1\text{H}$  NMR (400 MHz,  $\text{CDCl}_3$ ):  $\delta = 7.87 - 7.83$  (m, 3H), 7.81 (s, 1H), 7.55 – 7.46 (m, 3H), 2.57 – 2.50 (m, 2H), 1.50 – 1.40 (m, 2H), 1.39 – 1.27 (m, 4H), 0.90 (t,  $J = 7.0$  Hz, 3H).  $^{19}\text{F}$  NMR (376 MHz,  $\text{CDCl}_3$ ):  $\delta = -91.44$  (dt,  $J = 44.0, 2.8$  Hz, 1F),  $-91.59$  (d,  $J = 44.0$  Hz, 1F).  $^{13}\text{C}$  NMR (100 MHz,  $\text{CDCl}_3$ ):  $\delta = 153.8$  (dd,  $J = 290.2,$

286.7 Hz), 133.3, 132.4, 131.3 (dd,  $J = 4.3, 2.7$  Hz), 127.9, 127.9, 127.6, 127.2 (t,  $J = 3.4$  Hz), 126.2, 126.2 (d,  $J = 6.4$  Hz), 126.0, 92.6 (dd,  $J = 21.7, 12.7$  Hz), 31.2, 27.6, 27.4 (t,  $J = 2.5$  Hz), 22.3, 14.0. **HRMS (ESI, m/z)**: calcd. for  $C_{17}H_{19}F_2$   $[M+H]^+$ : 261.1448, found: 261.1455.

#### Preparation of compound **1u**<sup>[17]</sup>

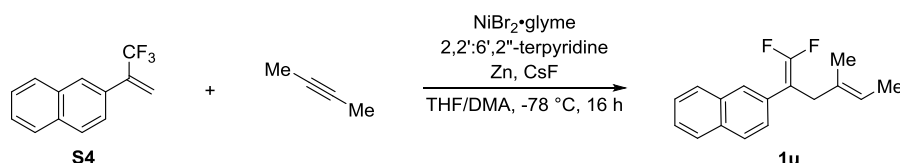

Ni(cod)<sub>2</sub> (14 mg, 0.05 mmol), PCy<sub>3</sub> (28 mg, 0.1 mmol) and toluene (5 mL) were added to a Schlenk tube equipped with a stir bar in glovebox. To the solution **S4** (222 mg, 1.0 mmol), Et<sub>3</sub>SiH (232 mg, 2.0 mmol) and 2-butyne (60 mg, 1.1 mmol) were added at room temperature. After stirring at 50 °C for 3 h, the reaction mixture was filtered through a short pad of silica gel and washed with EtOAc. The filtrate was concentrated under reduced pressure. The crude residue was purified by silica gel column chromatography on silica gel (hexane) to afford **1u** (232 mg, 0.9 mmol) in 90% yield as colorless oil. **<sup>1</sup>H NMR (400 MHz, CDCl<sub>3</sub>)**:  $\delta = 8.16 - 7.64$  (m, 4H), 7.66 – 7.31 (m, 3H), 5.39 – 5.28 (m, 1H), 3.20 (s, 2H), 1.66 (s, 3H), 1.57 (dq,  $J = 6.7, 1.3$  Hz, 3H). **<sup>19</sup>F NMR (376 MHz, CDCl<sub>3</sub>)**:  $\delta = -90.03$  (dt,  $J = 40.3, 3.0$  Hz), -90.50 (d,  $J = 40.3$  Hz). **<sup>13</sup>C NMR (100 MHz, CDCl<sub>3</sub>)**:  $\delta = 154.4$  (dd,  $J = 291.9, 287.6$  Hz), 133.2, 132.3, 131.8 (t,  $J = 2.5$  Hz), 131.4 (t,  $J = 3.9$  Hz), 127.9, 127.7, 127.5, 127.2 (t,  $J = 3.6$  Hz), 126.1 (dd,  $J = 4.0, 2.9$  Hz), 126.1, 126.0, 120.7, 90.7 (dd,  $J = 21.4, 12.1$  Hz), 37.6 (d,  $J = 1.7$  Hz), 15.5, 13.4. **HRMS (ESI, m/z)**: calcd. for  $C_{17}H_{17}F_2$   $[M+H]^+$ : 259.1298, found: 259.1303.

#### Preparation of compound **1v**<sup>[18]</sup>

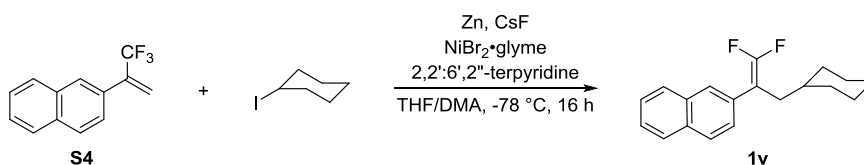

NiBr<sub>2</sub>·glyme (62 mg, 0.2 mmol), 2,2':6',2''-terpyridine (47 mg, 0.2 mmol), **S4** (444 mg, 2.0 mmol), Zn powder (260 mg, 4.0 mmol) and CsF (304 mg, 2.0 mmol) were added to a Schlenk tube equipped with a stir bar in glovebox. To these solids, THF (16 mL) and DMA (4 mL) was added under nitrogen atmosphere. The resulting mixture was stirred at room temperature for 1 min before alkyl iodide (4.0 mmol) was added. The reaction mixture was further stirred at 40 °C for 16 h. Next, the reaction mixture was quenched by adding H<sub>2</sub>O (20 mL) and extracted with ethyl acetate (15 mL × 3). The combined organic layers were washed with H<sub>2</sub>O (20 mL), brine (20 mL), dried over anhydrous Na<sub>2</sub>SO<sub>4</sub>, filtered and concentrated under reduced pressure. The crude residue was purified by column chromatograph on silica gel (petroleum ether/ethyl acetate = 50 : 1) to afford **1v** (155 mg, 0.5 mmol) in 27% yield as white solid. **<sup>1</sup>H NMR (400 MHz, CDCl<sub>3</sub>)**:  $\delta = 7.89 - 7.84$  (m, 3H), 7.81 (s, 1H), 7.56 – 7.47 (m, 3H), 2.43 (dt,  $J = 7.3, 2.5$  Hz, 2H), 1.81–1.61 (m, 5H), 1.39–1.28 (m, 1H), 1.22 – 1.09 (m, 3H), 1.04 – 0.94 (m, 2H). **<sup>19</sup>F NMR (376 MHz, CDCl<sub>3</sub>)**:  $\delta = -90.82$  (dt,  $J = 43.5, 3.0$  Hz, 1F), -91.52 (d,  $J = 42.8$  Hz, 1F). **<sup>13</sup>C NMR (100 MHz, CDCl<sub>3</sub>)**:  $\delta = 154.2$  (dd,  $J = 290.6, 286.2$  Hz), 133.3, 132.4, 131.5 (dd,  $J = 4.6, 3.2$  Hz), 127.9, 127.9, 127.6, 127.3 (t,  $J = 3.3$  Hz), 126.2 (t,  $J = 3.0$  Hz), 126.2, 126.0, 91.2 (dd,  $J = 22.2, 12.4$  Hz), 35.7 (t,  $J = 2.4$  Hz), 35.3, 32.9, 26.4, 26.0. **HRMS (ESI, m/z)**: calcd. for  $C_{19}H_{21}F_2$   $[M+H]^+$ : 287.1611, found: 287.1611.

### Preparation of compound **1w**<sup>[18]</sup>

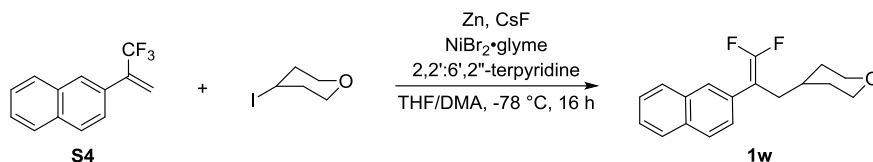

Following the procedure for **1v**, compound **1w** (231 mg, 0.8 mmol) was obtained in 40% yield as white solid. **<sup>1</sup>H NMR (400 MHz, CDCl<sub>3</sub>)**:  $\delta$  = 7.92 – 7.81 (m, 3H), 7.79 (s, 1H), 7.57 – 7.48 (m, 2H), 7.46 (ddd,  $J$  = 8.6, 1.8, 1.8 Hz, 1H), 4.00 – 3.87 (m, 2H), 3.25 (td,  $J$  = 11.8, 2.0 Hz, 2H), 2.48 (dt,  $J$  = 7.0, 2.4 Hz, 2H), 1.76 – 1.46 (m, 3H), 1.45 – 1.26 (m, 2H). **<sup>19</sup>F NMR (376 MHz, CDCl<sub>3</sub>)**:  $\delta$  = -90.29 (dt,  $J$  = 41.9, 3.0 Hz), -90.87 (d,  $J$  = 41.3 Hz). **<sup>13</sup>C NMR (100 MHz, CDCl<sub>3</sub>)**:  $\delta$  = 154.2 (dd,  $J$  = 291.1, 286.9 Hz), 133.2, 132.4, 131.0 (dd,  $J$  = 4.3, 3.1 Hz), 128.1, 127.8, 127.6, 127.2 (dd,  $J$  = 3.3, 3.3 Hz), 126.3, 126.1, 126.0 (dd,  $J$  = 3.1, 3.1 Hz), 90.5 (dd,  $J$  = 22.1, 13.1 Hz), 67.7, 34.7 (d,  $J$  = 1.5 Hz), 33.2 (t,  $J$  = 2.6 Hz), 32.6. **HRMS (ESI, m/z)**: calcd. for C<sub>18</sub>H<sub>19</sub>F<sub>2</sub>O [M+H]<sup>+</sup>: 289.1404, found: 289.1400.

### Preparation of compound **1x**<sup>[18]</sup>

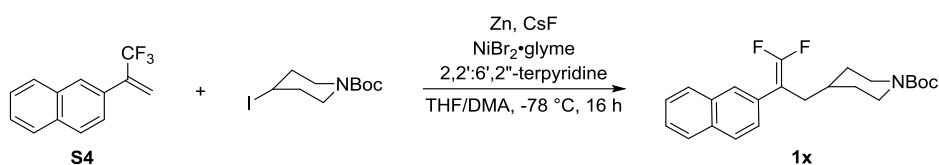

Following the procedure for **1v**, compound **1x** (325 mg, 0.8 mmol) was obtained in 42% yield as white solid. **<sup>1</sup>H NMR (400 MHz, CDCl<sub>3</sub>)**:  $\delta$  = 7.90 – 7.80 (m, 3H), 7.77 (d,  $J$  = 1.7 Hz, 1H), 7.55 – 7.46 (m, 2H), 7.44 (ddd,  $J$  = 8.6, 1.7, 1.7 Hz, 1H), 4.40 – 3.75 (m, 2H), 2.55 (t,  $J$  = 12.7 Hz, 2H), 2.49 – 2.40 (m, 2H), 1.73 – 1.60 (m, 2H), 1.54 – 1.39 (m, 10H), 1.25 – 1.05 (m, 2H). **<sup>19</sup>F NMR (376 MHz, CDCl<sub>3</sub>)**:  $\delta$  = -90.85 (d,  $J$  = 42.0 Hz), -90.22 (dt,  $J$  = 42.8, 3.5 Hz). **<sup>13</sup>C NMR (100 MHz, CDCl<sub>3</sub>)**:  $\delta$  = 154.7, 154.2 (dd,  $J$  = 291.1, 287.1 Hz), 133.2, 132.4, 131.0 (dd,  $J$  = 4.3, 3.2 Hz), 128.1, 127.8, 127.5, 127.2 (dd,  $J$  = 3.3, 3.3 Hz), 126.3, 126.1, 125.9 (t,  $J$  = 3.1 Hz), 90.6 (dd,  $J$  = 22.0, 13.1 Hz), 79.2, 34.4 (d,  $J$  = 0.8 Hz), 34.2 (dd,  $J$  = 2.5, 2.5 Hz), 31.7, 28.4, 28.3. **HRMS (ESI, m/z)**: calcd. for C<sub>23</sub>H<sub>28</sub>F<sub>2</sub>NO<sub>2</sub> [M+H]<sup>+</sup>: 388.2088, found: 388.2085.

## 3. Optimization of reaction conditions

Photocatalyst, Pd salt, ligand, Cs<sub>2</sub>CO<sub>3</sub> and **1a** (43 mg, 0.2 mmol) were added to a Schlenk tube equipped with a stir bar in glovebox. To these solids, DMA (0.1 M) and <sup>3</sup>Pr<sub>2</sub>N<sup>+</sup>Et was added under nitrogen atmosphere. The Schlenk tube was evacuated and filled with CO<sub>2</sub> (three cycles). Then the Schlenk tube was placed in front of the light source within approximately 1 cm distance (Figure S1) and stirred at ambient temperature (25~30 °C) for 24~48 h. Next, the reaction mixture was acidified by adding 1N HCl (10 mL) and extracted with ethyl acetate (10 mL × 3). The combined organic layers were washed with water (10 mL) and brine (10 mL) successively, and dried over Na<sub>2</sub>SO<sub>4</sub>. After filtration, the filtrate was concentrated under reduced pressure. To the residue were added 1,1,1-trifluoromethylbenzene (21.0  $\mu$ L, 0.200 mmol) and CDCl<sub>3</sub> (ca. 1 mL), and then <sup>19</sup>F NMR analysis was conducted using a portion of this solution. The yields were determined by comparison of an integrated value of the peak that corresponds to a vinylic fluoride of **2a** (both *Z* and *E* configuration) ( $\delta$  ppm) with that corresponds to three fluorides of 1,1,1-trifluoromethylbenzene ( $\delta$  ppm). The ratio of *Z* and *E*-**2a** was determined by the integration of corresponding peaks on <sup>19</sup>F NMR.



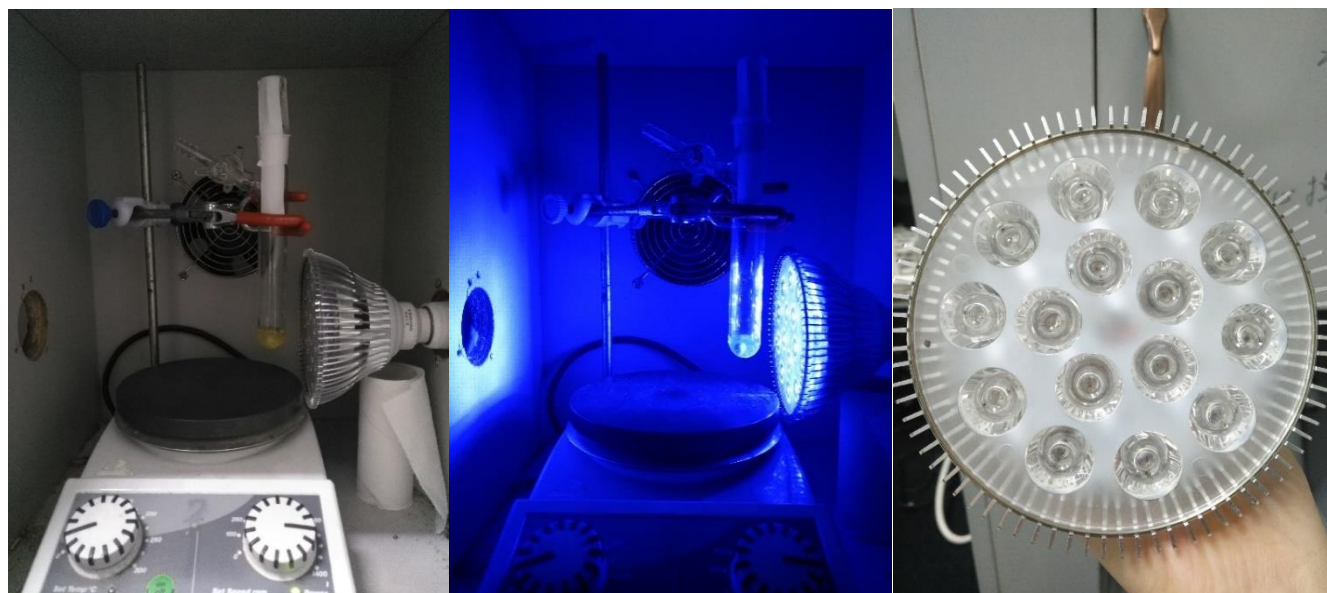

**Figure S1.** Experimental installation

**Table S1.** Screening of transition-metal catalyst.

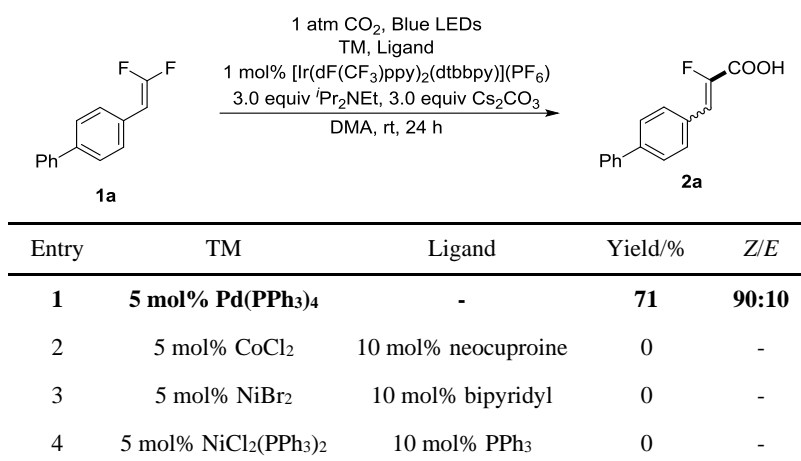

**Table S2.** Screening of photocatalyst.

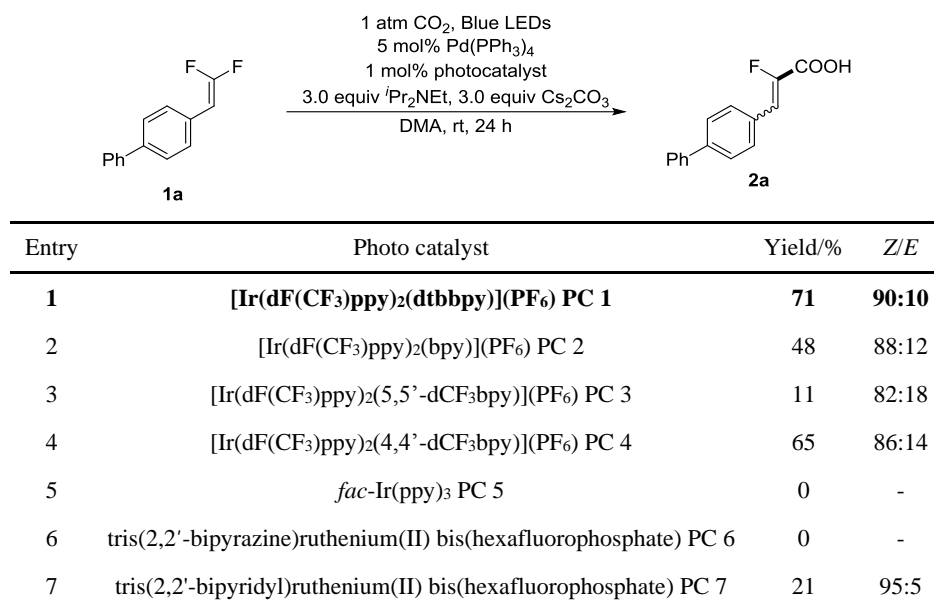

|   |                                                |       |   |
|---|------------------------------------------------|-------|---|
| 8 | 9-mesityl-10-methylacridinium perchlorate PC 8 | 0     | - |
| 9 | 4-CzIPN PC 9                                   | trace | - |

  

R, R' = 4-<sup>t</sup>Bu, 4'-<sup>t</sup>Bu, PC 1  
R, R' = H, H, PC 2  
R, R' = 5-CF<sub>3</sub>, 5'-CF<sub>3</sub>, PC 3  
R, R' = 4-CF<sub>3</sub>, 4'-CF<sub>3</sub>, PC 4

PC 5

X = N PC 6  
X = CH PC 7

PC 8

PC 9

**Table S3.** Screening of Pd salt.

| Entry    | [Pd]                                                | Yield/%   | Z/E         |
|----------|-----------------------------------------------------|-----------|-------------|
| 1        | Pd(OAc) <sub>2</sub>                                | 62        | 90:10       |
| 2        | Pd <sub>2</sub> (dba) <sub>3</sub>                  | 30        | 93:7        |
| 3        | [(allyl)PdCl] <sub>2</sub>                          | 44        | 91:9        |
| 4        | PdBr <sub>2</sub>                                   | 85        | 90:10       |
| 5        | Pd(PPh <sub>3</sub> ) <sub>4</sub>                  | 71        | 90:10       |
| <b>6</b> | <b>PdCl<sub>2</sub></b>                             | <b>87</b> | <b>92:8</b> |
| 7        | Pd(acac) <sub>2</sub>                               | 79        | 92:8        |
| 8        | Pd(cod)Cl <sub>2</sub>                              | 57        | 95:5        |
| 9        | Pd(CH <sub>3</sub> CN) <sub>2</sub> Cl <sub>2</sub> | 49        | 90:10       |
| 10       | Pd(4-CNPh) <sub>2</sub> Cl <sub>2</sub>             | 76        | 89:11       |
| 11       | Pd(OPiv) <sub>2</sub>                               | 45        | 91:9        |
| 12       | Na <sub>2</sub> PdCl <sub>4</sub>                   | 52        | 88:12       |
| 13       | Pd(OH) <sub>2</sub> /C                              | 22        | 91:9        |
| 14       | Pd(TFA) <sub>2</sub>                                | 74        | 92:8        |

**Table S4.** Screening of ligand.

| Entry | Ligand | Yield/% <sup>a</sup> | Z/E |
|-------|--------|----------------------|-----|
|-------|--------|----------------------|-----|

|    |                                                        |           |                      |
|----|--------------------------------------------------------|-----------|----------------------|
| 1  | <b>20 mol% PPh<sub>3</sub></b>                         | <b>87</b> | <b>92:8</b>          |
| 2  | 20 mol% PCy <sub>3</sub>                               | 58        | 93:7                 |
| 3  | 10 mol% dppe                                           | 50        | 94:6                 |
| 4  | 10 mol% Xantphos                                       | 52        | 86:14                |
| 5  | 20 mol% Xphos                                          | 63        | 92:8                 |
| 6  | 20 mol% Sphos                                          | 48        | 94:6                 |
| 7  | 20 mol% P( <i>p</i> -OMePh) <sub>3</sub>               | 65        | 89:11                |
| 8  | 20 mol% P( <i>p</i> -CF <sub>3</sub> Ph) <sub>3</sub>  | 45        | 93:7                 |
| 9  | 20 mol% TFP                                            | 45        | 93:7                 |
| 10 | 20 mol% P( <i>o</i> -tolyl) <sub>3</sub>               | 74        | 93:7                 |
| 11 | 20 mol% SIPr HCl                                       | 30        | 93:7                 |
| 12 | 20 mol% P( <i>t</i> -Bu) <sub>3</sub> HBF <sub>4</sub> | 53        | 90:10                |
| 13 | none                                                   | 45        | 91:9                 |
| 14 | none                                                   | 28        | 89:11 <sup>[a]</sup> |

[a] 5 mol% of 10% Pd/C (10.6 mg) was used instead of PdCl<sub>2</sub>.

**Table S5.** Screening of base.

1 atm CO<sub>2</sub>, Blue LEDs  
5 mol% PdCl<sub>2</sub>, 20 mol% PPh<sub>3</sub>  
1 mol% [Ir(dF(CF<sub>3</sub>)ppy)<sub>2</sub>(dtbbpy)](PF<sub>6</sub>)  
3.0 equiv <sup>i</sup>Pr<sub>2</sub>NEt, 3.0 equiv base  
DMA, rt, 24 h

| Entry    | Base                                | Yield/%   | Z/E         |
|----------|-------------------------------------|-----------|-------------|
| <b>1</b> | <b>Cs<sub>2</sub>CO<sub>3</sub></b> | <b>87</b> | <b>92:8</b> |
| 2        | K <sub>2</sub> CO <sub>3</sub>      | 66        | 97:3        |
| 3        | NaCO <sub>3</sub>                   | 47        | 94:6        |
| 4        | KOAc                                | 52        | 96:4        |
| 5        | NaOAc                               | 39        | 92:8        |
| 6        | CsOAc                               | 53        | 87:13       |
| 7        | KO <sup>t</sup> Bu                  | 31        | 94:6        |
| 8        | KOH                                 | 53        | 92:8        |
| 9        | K <sub>3</sub> PO <sub>4</sub>      | 69        | 96:4        |

**Table S6.** Screening of reductant.

1 atm CO<sub>2</sub>, Blue LEDs  
5 mol% PdCl<sub>2</sub>, 20 mol% PPh<sub>3</sub>  
1 mol% [Ir(dF(CF<sub>3</sub>)ppy)<sub>2</sub>(dtbbpy)](PF<sub>6</sub>)  
3.0 equiv reductant, 3.0 equiv Cs<sub>2</sub>CO<sub>3</sub>  
DMA, rt, 24 h

| Entry | Reductant | Yield/% | Z/E |
|-------|-----------|---------|-----|
|-------|-----------|---------|-----|

|                  |                              |    |       |
|------------------|------------------------------|----|-------|
| 1                | <i>i</i> Pr <sub>2</sub> NEt | 87 | 92:8  |
| 2                | NEt <sub>3</sub>             | 74 | 92:8  |
| 3                | <i>i</i> -Pr <sub>2</sub> NH | 36 | 78:22 |
| 4                | HCOONa                       | 6  | 67:33 |
| 5                | Cy <sub>2</sub> NMe          | 41 | 88:12 |
| 6 <sup>[a]</sup> | Me <sub>2</sub> NPh          | 11 | 73:27 |

[a] In the case of Me<sub>2</sub>NPh was used as reductant, an inseparable mixture of *Z* and *E*-S6 (25 mg, 0.08 mmol) was isolated in 40% yield as by column chromatography on silica gel (petroleum ether/ethyl acetate = 20:1).

### *N*-(3-((1,1'-biphenyl)-4-yl)-2-fluoroallyl)-*N*-methylaniline S6

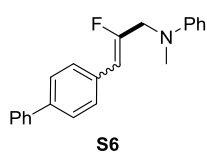

**Z-S6** <sup>1</sup>H NMR (400 MHz, CDCl<sub>3</sub>): δ = 7.62 – 7.54 (m, 5 H), 7.47 – 7.14 (m, 6H), 6.82 – 6.60 (m, 3H), 5.66 (d, *J* = 39.8 Hz, 1H), 4.12 (d, *J* = 7.7 Hz, 2H), 3.05 (s, 3H). <sup>19</sup>F NMR (376 MHz, CDCl<sub>3</sub>): δ = -108.37 (dt, *J* = 39.7, 7.8 Hz). <sup>13</sup>C NMR (100 MHz, CDCl<sub>3</sub>): δ = 156.8 (d, *J* = 270.9 Hz), 149.0, 140.7, 139.8 (d, *J* = 2.0 Hz), 132.1(d, *J* = 2.5 Hz), 129.3, 129.0, 128.8, 127.3, 127.1, 127.0, 117.4, 112.7,

106.2 (d, *J* = 6.0 Hz), 54.2 (d, *J* = 33.9 Hz), 38.4. **HRMS (ESI, m/z):** calcd. for C<sub>22</sub>H<sub>17</sub>BrF [M+H]<sup>+</sup>: 379.0498, found: 379.0493.

**E-S6** <sup>1</sup>H NMR (400 MHz, CDCl<sub>3</sub>): δ = 7.62 – 7.54 (m, 5 H), 7.47 – 7.14 (m, 6H), 6.82 – 6.60 (m, 3H), 6.47 (d, *J* = 20.8 Hz, 1H), 4.28 (d, *J* = 18.7 Hz, 2H), 2.98 (s, 3H). <sup>19</sup>F NMR (376 MHz, CDCl<sub>3</sub>): δ = -104.64 (q, *J* = 19.0 Hz). <sup>13</sup>C NMR (100 MHz, CDCl<sub>3</sub>): δ = 158.7 (d, *J* = 258.6 Hz), 149.0, 140.4, 140.1, 132.2(d, *J* = 13.0 Hz), 129.3, 129.0, 128.8, 127.5, 127.2, 127.0, 117.3, 113.0, 111.2 (d, *J* = 26.4 Hz), 49.9 (d, *J* = 26.5 Hz), 38.7. **HRMS (ESI, m/z):** calcd. for C<sub>22</sub>H<sub>17</sub>BrF [M+H]<sup>+</sup>: 318.1658, found: 318.1653.

**Table S7.** Screening of solvent.

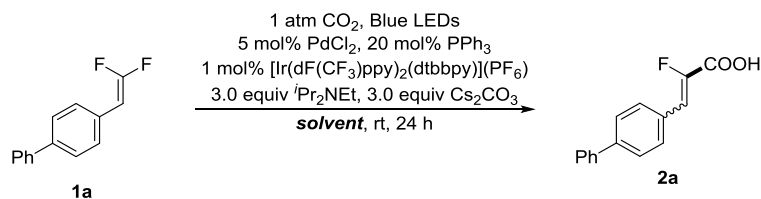

| Entry | Solvent            | Conversion/% <sup>a</sup> | <i>Z/E</i> |
|-------|--------------------|---------------------------|------------|
| 1     | DMA                | 87                        | 92:8       |
| 2     | DMF                | 88                        | 92:8       |
| 3     | THF                | 6                         | 83:17      |
| 4     | CH <sub>3</sub> CN | 17                        | 88:12      |
| 5     | Dioxane            | 0                         | -          |
| 6     | DMSO               | 35                        | 86:14      |

**Table S8.** Screening of equivalents of catalysts, base and reductant.

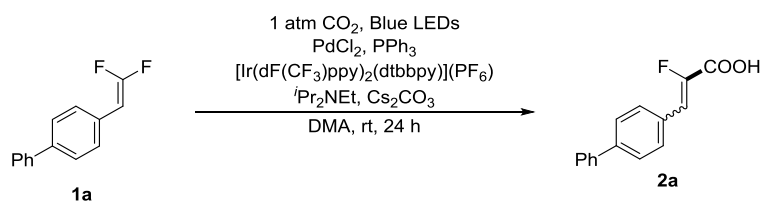

| Entry    | PC/mol%  | PdCl <sub>2</sub> /mol% | PPh <sub>3</sub> /mol% | Cs <sub>2</sub> CO <sub>3</sub> /equiv | <sup>i</sup> Pr <sub>2</sub> NEt/equiv | Yield/% <sup>a</sup> | Z/E         |
|----------|----------|-------------------------|------------------------|----------------------------------------|----------------------------------------|----------------------|-------------|
| 1        | 1        | 5                       | 20                     | 2                                      | 3                                      | 41                   | 93:7        |
| <b>2</b> | <b>1</b> | <b>5</b>                | <b>20</b>              | <b>3</b>                               | <b>3</b>                               | <b>87</b>            | <b>92:8</b> |
| 3        | 1        | 5                       | 20                     | 4                                      | 3                                      | 73                   | 93:7        |
| 4        | 1        | 5                       | 20                     | 5                                      | 3                                      | 65                   | 92:8        |
| 5        | 1        | 5                       | 20                     | 3                                      | 2                                      | 67                   | 90:10       |
| 6        | 1        | 5                       | 20                     | 3                                      | 4                                      | 67                   | 90:10       |
| 7        | 1        | 5                       | 20                     | 3                                      | 5                                      | 43                   | 91:9        |
| 8        | 0.1      | 5                       | 20                     | 3                                      | 3                                      | 73                   | 92:8        |
| 9        | 0.2      | 5                       | 20                     | 3                                      | 3                                      | 76                   | 91:9        |
| 10       | 0.5      | 5                       | 20                     | 3                                      | 3                                      | 69                   | 91:9        |
| 11       | 1        | 2.5                     | 10                     | 3                                      | 3                                      | 42                   | 93:7        |
| 12       | 1        | 7.5                     | 30                     | 3                                      | 3                                      | 68                   | 91:9        |
| 13       | 1        | 5                       | 10                     | 3                                      | 3                                      | 45                   | 93:7        |

**Table S9.** Optimization of reaction time.

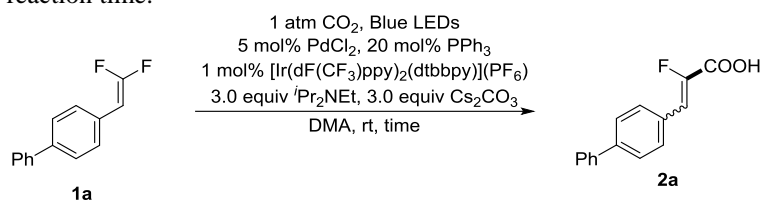

| Entry    | Time/h    | Yield/%                      | Z/E         |
|----------|-----------|------------------------------|-------------|
| 1        | 12        | 67                           | 96:4        |
| 2        | 24        | 87                           | 92:8        |
| 3        | 36        | 92                           | 92:8        |
| <b>4</b> | <b>48</b> | <b>100(97)<sup>[a]</sup></b> | <b>92:8</b> |

[a] The isolated yield of corresponding methyl ester is indicated in the parentheses.

**Table S10.** Control experiments.

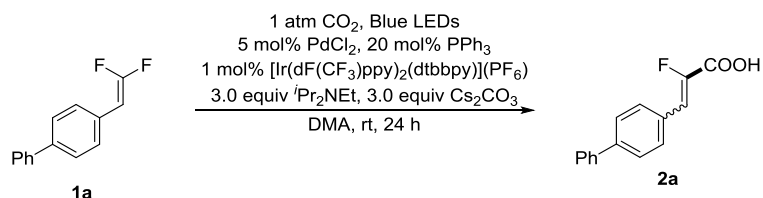

| Entry | Variation from the standard conditions      | Yield/% | Z/E   |
|-------|---------------------------------------------|---------|-------|
| 1     | Without PC 1                                | 0       | -     |
| 2     | Without PdCl <sub>2</sub> /PPh <sub>3</sub> | 0       | -     |
| 3     | Without photo irradiation                   | 0       | -     |
| 4     | Without Cs <sub>2</sub> CO <sub>3</sub>     | 41      | 63:37 |

#### 4. General procedure for C–F bond carboxylation reaction and spectral data of products

To an oven-dried Schlenk tube equipped with a magnetic stir bar was added [Ir(dF(CF<sub>3</sub>)ppy)<sub>2</sub>(dtbbpy)](PF<sub>6</sub>) (2.0 mg, 0.002 mmol, 1.0 mol%), PdCl<sub>2</sub> (1.8 mg, 0.01 mmol, 5.0 mol%), PPh<sub>3</sub> (10.4 mg, 0.04 mmol, 20 mol%) and Cs<sub>2</sub>CO<sub>3</sub> (196 mg, 0.6 mmol, 3.0 equiv) in glovebox. To these solids, compound **1** (0.2 mmol, 1.0 equiv), DMA (2.0 mL), <sup>1</sup>Pr<sub>2</sub>NEt (78 mg, 0.6 mmol, 3.0 equiv) was added under nitrogen atmosphere. The Schlenk tube was evacuated and filled with CO<sub>2</sub> (3 cycles). Then the Schlenk tube was placed in front of the blue LEDs with 1 cm distance and stirred at ambient temperature for 48 to 96 h. The reaction mixture was quenched with 1N HCl (10 mL) and extracted with ethyl acetate (10 mL × 3). The combined organic layers were washed with water (10 mL), brine (10 mL) and dried over Na<sub>2</sub>SO<sub>4</sub>. After solvent was removed under reduced pressure, the crude residue was dissolved in Et<sub>2</sub>O (2.0 mL) and MeOH (0.5 mL) and cooled to 0 °C. The Et<sub>2</sub>O solution of TMSCHN<sub>2</sub> (0.2 mL, 2 mol/L, 0.4 mmol, 2.0 equiv) was added at 0 °C. The mixture was stirred at 0 °C for 30 min. The volatile was removed under reduced pressure and the crude residue was purified by column chromatography or preparative TLC on silica gel (petroleum ether/ethyl acetate = 20:1 ~ 50 : 1) to afford the desired product.

##### methyl 3-([1,1'-biphenyl]-4-yl)-2-fluoroacrylate **2a**

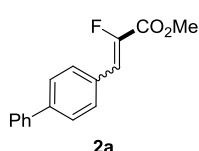

Following general procedure, the reaction mixture was stirred for 48 h and **2a** was obtained as white solid (49.7 mg, 0.13 mmol, 97%, *Z/E* = 92:8).

*Z*-isomer was further isolated and the NMR data was collected. <sup>1</sup>H NMR (400 MHz, CDCl<sub>3</sub>): δ = 7.73 (d, *J* = 8.4 Hz, 2H), 7.66–7.63 (m, 2H), 7.61 (s, 2H), 7.47 (t, *J* = 7.5 Hz, 2H), 7.38 (t, *J* = 7.3 Hz, 1H),

6.98 (d, *J* = 35.3 Hz, 1H), 3.91 (s, 3H). <sup>19</sup>F NMR (376 MHz, CDCl<sub>3</sub>): δ = -125.51 (d, *J* = 35.4 Hz, 1F). <sup>13</sup>C NMR (100 MHz, CDCl<sub>3</sub>): δ = 161.9 (d, *J* = 34.4 Hz), 146.8 (d, *J* = 267.4 Hz), 142.4 (d, *J* = 2.9 Hz), 140.1, 130.8 (d, *J* = 8.2 Hz), 130.0 (d, *J* = 4.5 Hz), 128.9, 127.9, 127.4, 127.0, 117.4 (d, *J* = 4.7 Hz), 52.7. HRMS (ESI, *m/z*): calcd. for C<sub>16</sub>H<sub>14</sub>FO<sub>2</sub> [M+H]<sup>+</sup>: 257.0978, found: 257.0969.

*E*-isomer was further isolated, <sup>1</sup>H NMR (400 MHz, CDCl<sub>3</sub>): δ = 7.66–7.56 (m, 6H), 7.46 (t, *J* = 7.5 Hz, 2H), 7.37 (t, *J* = 7.3 Hz, 1H), 6.96 (d, *J* = 22.9 Hz, 1H), 3.84 (s, 3H). <sup>19</sup>F NMR (376 MHz, CDCl<sub>3</sub>): δ = -117.32 (d, *J* = 22.9 Hz, 1F). <sup>13</sup>C NMR (100 MHz, CDCl<sub>3</sub>): δ = 161.0 (d, *J* = 35.5 Hz), 146.5 (d, *J* = 255.9 Hz), 141.7, 140.3, 130.3 (d, *J* = 2.9 Hz), 129.6 (d, *J* = 9.4 Hz), 128.8, 127.6, 127.0, 126.8, 121.8 (d, *J* = 26.5 Hz), 52.4. HRMS (ESI, *m/z*): calcd. for C<sub>16</sub>H<sub>14</sub>FO<sub>2</sub> [M+H]<sup>+</sup>: 257.0978, found: 257.0986.

##### methyl 2-fluoro-3-(4'-methoxy-[1,1'-biphenyl]-4-yl)acrylate **2b**

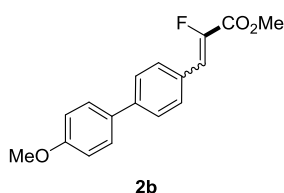

Following general procedure, the reaction mixture was stirred for 48 h and **2b** was obtained as white solid (35.5 mg, 0.13 mmol, 62%, *Z/E* = 91:9).

*Z*-isomer was further isolated and the NMR data was collected. <sup>1</sup>H NMR (400 MHz, CDCl<sub>3</sub>): δ = 7.70 (d, *J* = 8.4 Hz, 2H), 7.60 (d, *J* = 8.4 Hz, 2H), 7.57 (d, *J* = 8.7 Hz, 2H), 6.99 (d, *J* = 8.8 Hz, 2H), 6.97 (d, *J* = 35.4 Hz, 1H), 3.91 (s, 3H), 3.86 (s, 3H). <sup>19</sup>F NMR (376 MHz, CDCl<sub>3</sub>): δ

= -125.94 (d, *J* = 35.4 Hz, 1F). <sup>13</sup>C NMR (100 MHz, CDCl<sub>3</sub>): δ = 161.9 (d, *J* = 34.2 Hz), 159.6, 146.6 (d, *J* = 267.0 Hz), 142.0 (d, *J* = 3.0 Hz), 132.5, 130.8 (d, *J* = 8.2 Hz), 129.3 (d, *J* = 4.4 Hz), 128.1, 126.9, 117.6 (d, *J* = 4.6 Hz), 114.3, 55.3, 52.6. HRMS (ESI, *m/z*): calcd. for C<sub>17</sub>H<sub>16</sub>FO<sub>3</sub> [M+H]<sup>+</sup>: 287.1083, found: 287.1076.

##### methyl 2-fluoro-3-(4'-(trifluoromethoxy)-[1,1'-biphenyl]-4-yl)acrylate **2c**

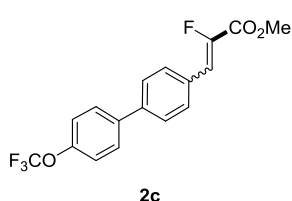

Following general procedure, the reaction mixture was stirred for 48 h and **2c** was obtained as white solid (61.2 mg, 0.18 mmol, 90%, *Z/E* = 88:12).

*Z*-isomer was further isolated and the NMR data was collected. **<sup>1</sup>H NMR (400 MHz, CDCl<sub>3</sub>):** δ = 7.73 (d, *J* = 8.4 Hz, 2H), 7.66–7.57 (m, 4H), 7.31 (d, *J* = 8.0 Hz, 2H), 6.97 (d, *J* = 35.1 Hz, 1H), 3.92 (s, 3H). **<sup>19</sup>F NMR (376 MHz, CDCl<sub>3</sub>):** δ = -57.79 (s, 3F), -125.01 (d, *J* = 35.1 Hz,

1F). **<sup>13</sup>C NMR (100 MHz, CDCl<sub>3</sub>):** δ = 161.8 (d, *J* = 34.3 Hz), 149.0, 147.0 (d, *J* = 268.3 Hz), 140.9 (d, *J* = 2.4 Hz), 138.8, 130.9 (d, *J* = 8.0 Hz), 130.4 (d, *J* = 4.4 Hz), 128.8, 127.4, 121.4, 120.4 (q, *J* = 256.7 Hz), 117.2 (d, *J* = 4.4 Hz), 52.7. **HRMS (ESI, *m/z*):** calcd. for C<sub>17</sub>H<sub>13</sub>F<sub>4</sub>O<sub>3</sub> [M+H]<sup>+</sup>: 341.0801, found: 341.0794.

#### methyl 2-fluoro-3-(4-(naphthalen-1-yl)phenyl)acrylate **2d**

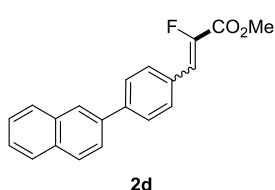

Following general procedure, the reaction mixture was stirred for 48 h and **2d** was obtained as white solid (52.0 mg, 0.17 mmol, 85%, *Z/E* = 99:1).

*Z*-isomer was further isolated and the NMR data was collected. **<sup>1</sup>H NMR (400 MHz, CDCl<sub>3</sub>):** δ = 8.08 (s, 1H), 7.98 – 7.85 (m, 3H), 7.82 – 7.73 (m, 5H), 7.56 – 7.47 (m, 2H), 7.00 (d, *J* = 35.3 Hz, 1H), 3.92 (s, 3H). **<sup>19</sup>F NMR (376 MHz, CDCl<sub>3</sub>):** δ = -125.33 (d, *J* = 35.3 Hz, 1F). **<sup>13</sup>C NMR (100 MHz, CDCl<sub>3</sub>):** δ = 161.9 (d, *J* = 34.4 Hz), 146.8 (d, *J* = 267.6 Hz), 142.3 (d, *J* = 2.9 Hz), 137.4, 133.6, 132.8, 130.9 (d, *J* = 8.2 Hz), 130.0 (d, *J* = 4.6 Hz), 128.6, 128.3, 127.7, 127.6, 126.4, 126.3, 126.0, 125.1, 117.4 (d, *J* = 4.6 Hz), 52.7. **HRMS (ESI, *m/z*):** calcd. for C<sub>20</sub>H<sub>16</sub>FO<sub>2</sub> [M+H]<sup>+</sup>: 307.1134, found: 307.1129.

#### methyl 3-(4-(1*H*-pyrazol-1-yl)phenyl)-2-fluoroacrylate **2e**

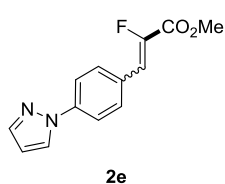

Following general procedure, the reaction mixture was stirred for 48 h and an inseparable mixture of *Z*-**2e** and *E*-**2e** was obtained as white solid (17.2 mg, 0.07 mmol, 35%, *Z/E* = 56:44).

*Z*-**2e**, **<sup>1</sup>H NMR (400 MHz, CDCl<sub>3</sub>):** δ = 7.97 (d, *J* = 2.5 Hz, 1H), 7.80 – 7.73 (m, 3H), 7.70 (d, *J* = 8.7 Hz, 2H), 6.94 (d, *J* = 35.0 Hz, 1H), 6.51 – 6.47 (m, 1H), 3.82 (s, 3H). **<sup>19</sup>F NMR (376 MHz, CDCl<sub>3</sub>):** δ = -125.44 (d, *J* = 34.8 Hz). **<sup>13</sup>C NMR (100 MHz, CDCl<sub>3</sub>):** δ = 161.7 (d, *J* = 34.4 Hz), 146.8 (d, *J* = 265.8 Hz), 141.4, 140.2, 131.1 (d, *J* = 2.9 Hz), 129.0 (d, *J* = 4.4 Hz), 126.6, 118.4, 116.8, 108.2, 52.7.

*E*-**2e**, **<sup>1</sup>H NMR (400 MHz, CDCl<sub>3</sub>):** δ = 7.95 (d, *J* = 2.5 Hz, 1H), 7.80 – 7.73 (m, 3H), 7.61 (d, *J* = 8.8 Hz, 2H), 6.92 (d, *J* = 22.6 Hz, 1H), 6.51 – 6.47 (m, 1H), 3.90 (s, 3H). **<sup>19</sup>F NMR (376 MHz, CDCl<sub>3</sub>):** δ = -116.79 (d, *J* = 22.8 Hz). **<sup>13</sup>C NMR (100 MHz, CDCl<sub>3</sub>):** δ = 160.9 (d, *J* = 35.7 Hz), 146.6 (d, *J* = 254.7 Hz), 141.6, 140.6 (d, *J* = 3.5 Hz), 131.5 (d, *J* = 8.5 Hz), 128.7 (d, *J* = 9.7 Hz), 126.6, 121.2 (d, *J* = 26.8 Hz), 118.9, 108.0, 52.4. **HRMS (ESI, *m/z*):** calcd. for C<sub>13</sub>H<sub>12</sub>FN<sub>2</sub>O<sub>2</sub> [M+H]<sup>+</sup>: 247.0883, found: 247.0874.

#### methyl 3-([1,1'-biphenyl]-4-yl)-2-fluoroacrylate **2f**

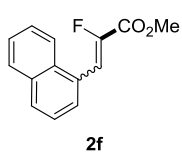

Following general procedure, the reaction mixture was stirred for 48 h and an inseparable mixture of *Z*-**2f** and *E*-**2f** was obtained as white solid (44.2 mg, 0.19 mmol, 96%, *Z/E* = 63:37).

*Z*-isomer, **<sup>1</sup>H NMR (400 MHz, CDCl<sub>3</sub>):** δ = 8.10 (d, *J* = 8.3 Hz, 1H), 8.00 (d, *J* = 7.3 Hz, 1H), 7.93 – 7.83 (m, 2H), 7.72 (d, *J* = 33.2 Hz, 1H), 7.63 – 7.44 (m, 3H), 3.97 (s, 3H). **<sup>19</sup>F NMR (376 MHz, CDCl<sub>3</sub>):** δ = -126.21 (d, *J* = 33.2 Hz). **<sup>13</sup>C NMR (100 MHz, CDCl<sub>3</sub>):** δ = 161.8 (d, *J* = 34.8 Hz), 147.5 (d, *J* = 268.2 Hz), 133.5, 131.4, 130.1 (d, *J* = 1.8 Hz), 129.0, 128.8, 128.6, 126.9, 126.1, 125.4, 123.4, 114.1 (d, *J* = 5.3 Hz), 52.7.

*E*-isomer,  $^1\text{H NMR}$  (400 MHz,  $\text{CDCl}_3$ ):  $\delta = 7.93 - 7.83$  (m, 3H), 7.63 – 7.44 (m, 4H), 7.39 (d,  $J = 19.7$  Hz, 1H), 3.64 (s, 3H).  $^{19}\text{F NMR}$  (376 MHz,  $\text{CDCl}_3$ ):  $\delta = -116.39$  (d,  $J = 19.7$  Hz).  $^{13}\text{C NMR}$  (100 MHz,  $\text{CDCl}_3$ ):  $\delta = 160.7$  (d,  $J = 36.3$  Hz), 147.9 (d,  $J = 255.5$  Hz), 133.2, 131.3 (d,  $J = 2.6$  Hz), 128.7, 128.4, 128.3, 126.9 (d,  $J = 5.7$  Hz), 126.5, 126.0, 125.0, 124.3, 119.4 (d,  $J = 23.9$  Hz), 52.2. **HRMS (ESI, m/z)**: calcd. for  $\text{C}_{14}\text{H}_{12}\text{FO}_2$   $[\text{M}+\text{H}]^+$ : 231.0821, found: 231.0821.

### methyl 2-fluoro-3-(naphthalen-2-yl)acrylate **2g**

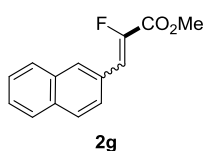

Following general procedure, the reaction mixture was stirred for 48 h and **2g** was obtained as white solid (37.7 mg, 0.16 mmol, 82%,  $Z/E = 92:8$ ).

*Z*-isomer was further isolated and the NMR data was collected.  $^1\text{H NMR}$  (400 MHz,  $\text{CDCl}_3$ ):  $\delta = 8.10$  (s, 1H), 7.91 – 7.81 (m, 3H), 7.78 (dd,  $J = 8.6, 1.8$  Hz, 1H), 7.57 – 7.46 (m, 2H), 7.10 (d,  $J = 35.3$  Hz, 1H), 3.93 (s, 3H).  $^{19}\text{F NMR}$  (376 MHz,  $\text{CDCl}_3$ ):  $\delta = -125.6$  (d,  $J = 35.3$  Hz, 1F).  $^{13}\text{C NMR}$  (100 MHz,  $\text{CDCl}_3$ ):  $\delta = 161.9$  (d,  $J = 34.6$  Hz), 146.9 (d,  $J = 267.9$  Hz), 133.6 (d,  $J = 2.2$  Hz), 133.1, 130.8 (d,  $J = 8.0$  Hz), 128.6 (d,  $J = 4.5$  Hz), 128.6 (d,  $J = 1.0$  Hz), 128.5, 127.6, 127.3, 126.7 (d,  $J = 8.3$  Hz), 126.6, 117.9 (d,  $J = 4.6$  Hz), 52.7. **HRMS (ESI, m/z)**: calcd. for  $\text{C}_{14}\text{H}_{12}\text{FO}_2$   $[\text{M}+\text{H}]^+$ : 231.0821, found: 231.0813.

### methyl 3-(dibenzo[*b,d*]furan-3-yl)-2-fluoroacrylate **2h**

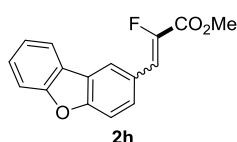

Following general procedure, the reaction mixture was stirred for 96 h and **2h** was obtained as white solid (26.5 mg, 0.10 mmol, 49%,  $Z/E = 54:46$ ).

*Z*-isomer was further isolated and the NMR data was collected.  $^1\text{H NMR}$  (400 MHz,  $\text{CDCl}_3$ ):  $\delta = 8.28$  (d,  $J = 1.8$  Hz, 1H), 7.98 (d,  $J = 7.6$  Hz, 1H), 7.73 (d,  $J = 8.5$  Hz, 1H), 7.58 (d,  $J = 8.2$  Hz, 2H), 7.49 (dd,  $J = 7.4, 7.4$  Hz, 1H), 7.38 (dd,  $J = 7.4, 7.4$  Hz, 1H), 7.09 (d,  $J = 35.1$  Hz, 1H), 3.93 (s, 3H).  $^{19}\text{F NMR}$  (376 MHz,  $\text{CDCl}_3$ ):  $\delta = -127.48$  (d,  $J = 35.3$  Hz).  $^{13}\text{C NMR}$  (100 MHz,  $\text{CDCl}_3$ ):  $\delta = 162.0$  (d,  $J = 34.2$  Hz), 156.7, 156.6, 146.2 (d,  $J = 265.3$  Hz), 129.7 (d,  $J = 7.6$  Hz), 127.8, 125.9 (d,  $J = 4.4$  Hz), 124.9, 123.6, 123.1, 122.8, 122.7, 120.9, 117.9 (d,  $J = 4.5$  Hz), 112.0 (d,  $J = 25.3$  Hz), 52.7. **HRMS (ESI, m/z)**: calcd. for  $\text{C}_{16}\text{H}_{11}\text{FO}_3$   $[\text{M}+\text{H}]^+$ : 271.0770, found: 271.0772.

*E*-isomer was further isolated and the NMR data was collected.  $^1\text{H NMR}$  (400 MHz,  $\text{CDCl}_3$ ):  $\delta = 8.18$  (s, 1H), 7.96 (d,  $J = 7.6$  Hz, 1H), 7.65 – 7.53 (m, 3H), 7.48 (dd,  $J = 7.4, 7.4$  Hz, 1H), 7.36 (dd,  $J = 7.4, 7.4$  Hz, 1H), 7.08 (d,  $J = 23.0$  Hz, 1H), 3.83 (s, 3H).  $^{19}\text{F NMR}$  (376 MHz,  $\text{CDCl}_3$ ):  $\delta = -118.12$  (d,  $J = 23.0$  Hz).  $^{13}\text{C NMR}$  (100 MHz,  $\text{CDCl}_3$ ):  $\delta = 161.1$  (d,  $J = 35.7$  Hz), 156.6, 156.3, 146.3 (d,  $J = 254.5$  Hz), 129.3 (d,  $J = 2.8$  Hz), 127.5, 125.3 (d,  $J = 9.4$  Hz), 124.3, 123.8, 123.0, 122.5, 122.3, 122.2, 120.8, 111.6 (d,  $J = 41.4$  Hz), 52.3. **HRMS (ESI, m/z)**: calcd. for  $\text{C}_{16}\text{H}_{11}\text{FO}_3$   $[\text{M}+\text{H}]^+$ : 271.0770, found: 271.0774.

### methyl 3-(benzo[*b*]thiophen-2-yl)-2-fluoroacrylate **2i**

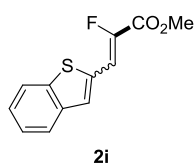

Following general procedure, the reaction mixture was stirred for 48 h and **2i** was obtained as white solid (30.7 mg, 0.13 mmol, 65%,  $Z/E = 75:25$ ).

*Z*-isomer was further isolated and the NMR data was collected.  $^1\text{H NMR}$  (400 MHz,  $\text{CDCl}_3$ ):  $\delta = 7.89 - 7.74$  (m, 2H), 7.56 (s, 1H), 7.42 – 7.35 (m, 2H), 7.28 (d,  $J = 33.6$  Hz, 1H), 3.92 (s, 3H).  $^{19}\text{F NMR}$  (376 MHz,  $\text{CDCl}_3$ ):  $\delta = -122.67$  (d,  $J = 33.5$  Hz).  $^{13}\text{C NMR}$  (100 MHz,  $\text{CDCl}_3$ ):  $\delta = 161.3$  (d,  $J = 33.2$  Hz), 146.3 (d,  $J = 268.6$  Hz), 141.8 (d,  $J = 7.8$  Hz), 138.7, 133.4 (d,  $J = 6.2$  Hz), 128.3 (d,  $J = 5.4$  Hz), 125.9, 124.8, 124.3 (d,  $J = 2.0$  Hz), 122.3, 112.7 (d,  $J = 8.2$  Hz), 52.8. **HRMS (ESI, m/z)**: calcd. for  $\text{C}_{12}\text{H}_{10}\text{FO}_2\text{S}$   $[\text{M}+\text{H}]^+$ : 237.0386, found: 237.0385.

*E*-isomer was further isolated and the NMR data was collected.  $^1\text{H NMR}$  (400 MHz,  $\text{CDCl}_3$ ): 7.85– 7.75 (m, 2H), 7.62–7.61 (dd,  $J = 1.8, 0.9$  Hz 1H), 7.40 – 7.34 (m, 2H), 7.19–7.13 (dd,  $J = 23.3, 0.9$  Hz, 1H), 3.96 (s, 3H).  $^{19}\text{F NMR}$  (376 MHz,



**CDCl<sub>3</sub>**):  $\delta$  = -120.26 (d,  $J$  = 23.3 Hz). **<sup>13</sup>C NMR (100 MHz, CDCl<sub>3</sub>)**:  $\delta$  = 161.2 (d,  $J$  = 34.5 Hz), 145.3 (d,  $J$  = 256.5 Hz), 142.4 (d,  $J$  = 2.8 Hz), 138.5, 133.2 (d,  $J$  = 9.0 Hz), 131.3 (d,  $J$  = 6.9 Hz), 126.0 (d,  $J$  = 1.4 Hz), 124.7, 124.1 (d,  $J$  = 0.9 Hz), 122.2, 117.8 (d,  $J$  = 32.8 Hz), 52.6. **HRMS (ESI, m/z)**: calcd. for C<sub>18</sub>H<sub>17</sub>FO<sub>2</sub> [M+H]<sup>+</sup>: 237.0386, found: 237.0387.

#### methyl 3-([1,1'-biphenyl]-4-yl)-2-fluoroacrylate **2j**

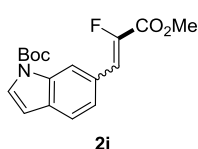

Following general procedure, the reaction mixture was stirred for 48 h and **2j** was obtained as white solid (26.2 mg, 0.08 mmol, 41%,  $Z/E$  = 58:42).

$Z$ -isomer was further isolated and the NMR data was collected. **<sup>1</sup>H NMR (400 MHz, CDCl<sub>3</sub>)**:  $\delta$  = 8.52 (s, 1H), 7.70 (d,  $J$  = 3.5 Hz, 1H), 7.57 (d,  $J$  = 8.2 Hz, 1H), 7.49 (d,  $J$  = 8.1 Hz, 1H), 7.07 (d,  $J$  = 35.4 Hz, 1H), 6.58 (d,  $J$  = 3.6 Hz, 1H), 3.90 (s, 3H), 1.70 (s, 9H). **<sup>19</sup>F NMR (376 MHz, CDCl<sub>3</sub>)**:  $\delta$  = -126.98 (d,  $J$  = 35.5 Hz). **<sup>13</sup>C NMR (100 MHz, CDCl<sub>3</sub>)**:  $\delta$  = 162.1 (d,  $J$  = 34.4 Hz), 149.6, 146.1 (d,  $J$  = 265.5 Hz), 135.1, 131.9, 128.0, 127.0 (d,  $J$  = 4.7 Hz), 125.1 (d,  $J$  = 7.5 Hz), 121.1, 119.0 (d,  $J$  = 4.2 Hz), 117.4 (d,  $J$  = 10.0 Hz), 107.2, 84.4, 52.6, 28.2. **HRMS (ESI, m/z)**: calcd. for C<sub>17</sub>H<sub>18</sub>FO<sub>2</sub>Na [M+H]<sup>+</sup>: 320.1298, found: 320.1287.

$E$ -isomer was further isolated and the NMR data was collected. **<sup>1</sup>H NMR (400 MHz, CDCl<sub>3</sub>)**:  $\delta$  = 8.36 (s, 1H), 7.63 (d,  $J$  = 3.7 Hz, 1H), 7.53 (d,  $J$  = 8.2 Hz, 1H), 7.37 (dd,  $J$  = 8.1, 1.5 Hz, 1H), 7.06 (d,  $J$  = 23.2 Hz, 1H), 6.56 (d,  $J$  = 3.7 Hz, 1H), 3.82 (s, 3H), 1.67 (s, 9H). **<sup>19</sup>F NMR (376 MHz, CDCl<sub>3</sub>)**:  $\delta$  = -118.48 (d,  $J$  = 23.2 Hz). **<sup>13</sup>C NMR (100 MHz, CDCl<sub>3</sub>)**:  $\delta$  = 161.1 (d,  $J$  = 36.2 Hz), 149.6, 146.2 (d,  $J$  = 251.2 Hz), 134.9, 131.1, 127.3, 126.6 (d,  $J$  = 9.2 Hz), 124.6 (d,  $J$  = 2.6 Hz), 123.1 (d,  $J$  = 26.4 Hz), 120.4, 116.8 (d,  $J$  = 3.1 Hz), 107.2, 84.0, 52.3, 28.2. **HRMS (ESI, m/z)**: calcd. for C<sub>17</sub>H<sub>18</sub>FO<sub>2</sub>Na [M+Na]<sup>+</sup>: 342.1118, found: 342.1108.

#### methyl 3-([1,1'-biphenyl]-4-yl)-2-fluoroacrylate **2k**

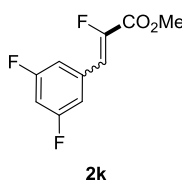

Following general procedure, the reaction mixture was stirred for 48 h and an inseparable mixture of  $Z$ -**2k** and  $E$ -**2k** was obtained as white solid (15.1 mg, 0.07 mmol, 35%,  $Z/E$  = 82:18).

$Z$ -isomer, **<sup>1</sup>H NMR (400 MHz, CDCl<sub>3</sub>)**:  $\delta$  = 7.19 – 7.14 (m, 2H), 6.85 (d,  $J$  = 33.3 Hz, 1H), 6.85 (tt,  $J$  = 8.8, 2.4 Hz, 1H), 3.91 (s, 3H). **<sup>19</sup>F NMR (376 MHz, CDCl<sub>3</sub>)**:  $\delta$  = -109.01 (t,  $J$  = 7.9 Hz), -121.51 (d,  $J$  = 33.3 Hz). **<sup>13</sup>C NMR (100 MHz, CDCl<sub>3</sub>)**:  $\delta$  = 163.0 (dd,  $J$  = 248.0, 12.9 Hz), 161.2 (d,  $J$  = 34.4 Hz), 148.0 (d,  $J$  = 272.4 Hz), 133.7 (td,  $J$  = 10.3, 4.0 Hz), 115.5 (q,  $J$  = 3.4 Hz), 112.9 (dd,  $J$  = 26.6, 8.4 Hz), 105.2 (td,  $J$  = 25.4, 2.3 Hz), 52.9. **HRMS (ESI, m/z)**: calcd. for C<sub>10</sub>H<sub>8</sub>F<sub>3</sub>O<sub>2</sub> [M+H]<sup>+</sup>: 217.0476, found: 217.0470.

#### methyl 2-fluoro-3-(4-(trifluoromethyl)phenyl)acrylate **2l**

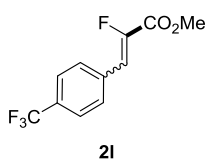

Following general procedure, the reaction mixture was stirred for 48 h and **2l** was obtained as white solid (36.2 mg, 0.15 mmol, 73%,  $Z/E$  = 84:16).

$Z$ -isomer was further isolated and the NMR data was collected. **<sup>1</sup>H NMR (400 MHz, CDCl<sub>3</sub>)**:  $\delta$  = 7.75 (d,  $J$  = 8.2 Hz, 2H), 7.66 (d,  $J$  = 8.3 Hz, 2H), 6.96 (d,  $J$  = 34.3 Hz, 1H), 3.92 (s, 3H). **<sup>19</sup>F NMR (376 MHz, CDCl<sub>3</sub>)**:  $\delta$  = -62.95, -122.38 (d,  $J$  = 34.2 Hz). **<sup>13</sup>C NMR (100 MHz, CDCl<sub>3</sub>)**:  $\delta$  = 161.4 (d,  $J$  = 34.5 Hz), 148.0 (d,  $J$  = 271.6 Hz), 134.4, 131.2 (dd,  $J$  = 32.8, 2.8 Hz), 130.4 (d,  $J$  = 8.4 Hz), 125.7 (q,  $J$  = 3.1 Hz), 123.7 (q,  $J$  = 272.4 Hz), 116.1 (d,  $J$  = 4.1 Hz), 52.9. **HRMS (ESI, m/z)**: calcd. for C<sub>11</sub>H<sub>9</sub>F<sub>4</sub>O<sub>2</sub> [M+H]<sup>+</sup>: 249.0539, found: 249.0538.

#### methyl 3-(4-(diethylcarbamoyl)phenyl)-2-fluoroacrylate **2m**

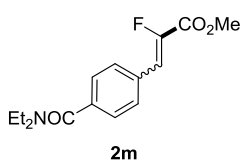

Following general procedure, the reaction mixture was stirred for 48 h and an inseparable mixture of  $Z$ -**2m** and  $E$ -**2m** was obtained as white solid (44.6 mg, 0.16 mmol, 80%,  $Z/E$  = 73:27).

*Z*-isomer,  $^1\text{H NMR}$  (400 MHz,  $\text{CDCl}_3$ ):  $\delta = 7.66$  (d,  $J = 8.3$  Hz, 2H), 7.40 (d,  $J = 8.3$  Hz, 2H), 6.92 (d,  $J = 34.9$  Hz, 1H), 3.89 (s, 3H), 3.39 (d,  $J = 114.0$  Hz, 4H), 1.17 (d,  $J = 52.3$  Hz, 6H).  $^{19}\text{F NMR}$  (376 MHz,  $\text{CDCl}_3$ ):  $\delta = -124.23$  (d,  $J = 34.9$  Hz).  $^{13}\text{C NMR}$  (100 MHz,  $\text{CDCl}_3$ ):  $\delta = 170.4$ , 161.6 (d,  $J = 34.4$  Hz), 147.2 (d,  $J = 269.1$  Hz), 138.3, 131.7 (d,  $J = 4.4$  Hz), 130.3 (d,  $J = 8.2$  Hz), 126.8, 116.89 (d,  $J = 4.5$  Hz), 52.7, 43.2, 39.3.

*E*-isomer,  $^1\text{H NMR}$  (400 MHz,  $\text{CDCl}_3$ ):  $\delta = 7.51$  (d,  $J = 8.0$  Hz, 2H), 7.36 (d,  $J = 8.3$  Hz, 2H), 6.91 (d,  $J = 22.4$  Hz, 1H), 3.79 (s, 3H), 3.39 (d,  $J = 114.0$  Hz, 4H), 1.17 (d,  $J = 52.3$  Hz, 6H).  $^{19}\text{F NMR}$  (376 MHz,  $\text{CDCl}_3$ ):  $\delta = -116.04$  (d,  $J = 22.4$  Hz).  $^{13}\text{C NMR}$  (100 MHz,  $\text{CDCl}_3$ ):  $\delta = 170.6$ , 160.8 (d,  $J = 35.9$  Hz), 142.8 (d,  $J = 255.4$  Hz), 137.5, 131.6 (d,  $J = 9.5$  Hz), 129.8 (d,  $J = 2.9$  Hz), 126.1, 121.1 (d,  $J = 26.5$  Hz), 52.3, 14.2, 12.8. **HRMS (ESI, m/z)**: calcd. for  $\text{C}_{15}\text{H}_{18}\text{FNO}_3$   $[\text{M}+\text{H}]^+$ : 280.1349, found: 280.1343.

#### methyl 2-fluoro-3-(4-(methylsulfonyl)phenyl)acrylate **2n**

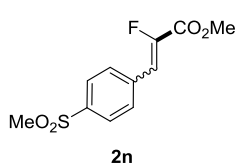

Following general procedure, the reaction mixture was stirred for 48 h and an inseparable mixture of *Z*-**2n** and *E*-**2n** was obtained as white solid (27.9 mg, 0.11 mmol, 54%, *Z/E* = 90:10).

*Z*-isomer was further isolated and the NMR data was collected.  $^1\text{H NMR}$  (400 MHz,  $\text{CDCl}_3$ ):  $\delta = 7.97$  (d,  $J = 8.5$  Hz, 2H), 7.81 (d,  $J = 8.4$  Hz, 2H), 6.97 (d,  $J = 33.9$  Hz, 1H), 3.92 (s, 3H), 3.07 (s, 3H).  $^{19}\text{F NMR}$  (376 MHz,  $\text{CDCl}_3$ ):  $\delta = -120.53$  (d,  $J = 33.9$  Hz).  $^{13}\text{C NMR}$  (100 MHz,  $\text{CDCl}_3$ ):  $\delta = 161.1$  (d,  $J = 34.5$  Hz), 148.5 (d,  $J = 273.6$  Hz), 140.9 (d,  $J = 3.0$  Hz), 136.2 (d,  $J = 4.2$  Hz), 130.8 (d,  $J = 8.3$  Hz), 127.8, 115.5 (d,  $J = 4.3$  Hz), 53.0, 44.4. **HRMS (ESI, m/z)**: calcd. for  $\text{C}_{11}\text{H}_{12}\text{FO}_4\text{S}$   $[\text{M}+\text{H}]^+$ : 259.0440, found: 259.0433.

#### *tert*-butyl 3-(2-fluoro-3-methoxy-3-oxoprop-1-en-1-yl)benzoate **2o**

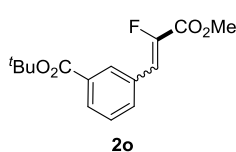

Following general procedure, the reaction mixture was stirred for 48 h and an inseparable mixture of *Z*-**2o** and *E*-**2o** was obtained as white solid (30.8 mg, 0.11 mmol, 55%, *Z/E* = 73:27). *Z*-isomer,

$^1\text{H NMR}$  (400 MHz,  $\text{CDCl}_3$ ):  $\delta = 8.20$  (s, 1H), 7.99 (d,  $J = 7.8$  Hz, 1H), 7.83 (d,  $J = 8.0$  Hz, 1H), 7.46 (t,  $J = 7.9$  Hz, 1H), 6.96 (d,  $J = 34.8$  Hz, 1H), 3.9 (s, 3H), 1.60 (s, 9H).  $^{19}\text{F NMR}$  (376 MHz,  $\text{CDCl}_3$ ):  $\delta = -124.28$  (d,  $J = 34.8$  Hz).  $^{13}\text{C NMR}$  (100 MHz,  $\text{CDCl}_3$ ):  $\delta = 165.0$ , 161.6 (d,  $J = 34.3$  Hz), 147.2 (d,  $J = 268.9$  Hz), 133.7 (d,  $J = 9.0$  Hz), 132.6, 131.2 (d,  $J = 7.3$  Hz), 130.6 (d,  $J = 7.1$  Hz), 130.5, 128.8, 116.9 (d,  $J = 4.4$  Hz), 81.4, 52.8, 28.1. **HRMS (ESI, m/z)**: calcd. for  $\text{C}_{15}\text{H}_{18}\text{FO}_4$   $[\text{M}+\text{H}]^+$ : 281.1189, found: 281.1180.

*E*-isomer,  $^1\text{H NMR}$  (400 MHz,  $\text{CDCl}_3$ ):  $\delta = 8.04$  (s, 1H), 7.95 (d,  $J = 7.8$  Hz, 1H), 7.64 (d,  $J = 7.7$  Hz, 1H), 7.40 (t,  $J = 7.8$  Hz, 1H), 6.93 (d,  $J = 21.8$  Hz, 1H), 3.78 (s, 3H), 1.59 (s, 9H).  $^{19}\text{F NMR}$  (376 MHz,  $\text{CDCl}_3$ ):  $\delta = -116.52$  (d,  $J = 21.8$  Hz).  $^{13}\text{C NMR}$  (100 MHz,  $\text{CDCl}_3$ ):  $\delta = 165.2$ , 160.7 (d,  $J = 36.1$  Hz), 147.1 (d,  $J = 214.0$  Hz), 133.4 (d,  $J = 2.3$  Hz), 131.9, 131.1 (d,  $J = 4.1$  Hz), 130.9 (d,  $J = 9.7$  Hz), 129.6, 128.0, 121.0 (d,  $J = 26.1$  Hz), 81.3, 52.4, 28.1. **HRMS (ESI, m/z)**: calcd. for  $\text{C}_{15}\text{H}_{18}\text{FO}_4$   $[\text{M}+\text{H}]^+$ : 281.1189, found: 281.1180.

#### methyl 2-fluoro-3-(3-(trifluoromethyl)phenyl)acrylate **2p**

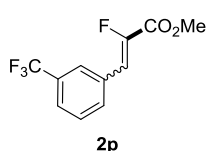

Following general procedure, the reaction mixture was stirred for 48 h and **2p** was obtained as white solid (20.8 mg, 0.08 mmol, 42%, *Z/E* = 90:10).

*Z*-isomer was further isolated and the NMR data was collected.  $^1\text{H NMR}$  (400 MHz,  $\text{CDCl}_3$ ):  $\delta = 7.87$  (s, 1H), 7.83 (d,  $J = 7.8$  Hz, 1H), 7.63 (d,  $J = 7.8$  Hz, 1H), 7.54 (t,  $J = 7.9$  Hz, 1H), 6.96 (d,  $J = 34.2$  Hz, 1H), 3.92 (s, 3H).  $^{19}\text{F NMR}$  (376 MHz,  $\text{CDCl}_3$ ):  $\delta = -62.93$ , -123.05 (d,  $J = 34.3$  Hz).  $^{13}\text{C NMR}$  (100 MHz,  $\text{CDCl}_3$ ):  $\delta = 161.4$  (d,  $J = 34.5$  Hz), 147.7 (d,  $J = 270.4$  Hz), 133.2 (d,  $J = 8.3$  Hz), 131.7 (d,  $J = 4.0$  Hz), 131.3 (d,  $J = 32.6$  Hz), 129.4, 126.81 (m), 126.2, 123.7 (q,  $J = 272.5$  Hz), 116.1, 52.9. **HRMS (ESI, m/z)**: calcd. for  $\text{C}_{11}\text{H}_{10}\text{FO}_2$   $[\text{M}+\text{H}]^+$ : 249.0539, found: 249.0541.

### methyl 3-(3-cyanophenyl)-2-fluoroacrylate **2q**

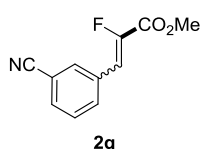

Following general procedure, the reaction mixture was stirred for 48 h and the mixture of *Z*-**2q** and *E*-**2q** was obtained as white solid (31.6 mg, 0.15 mmol, 77%, *Z/E* = 86:14).

*Z*-isomer was further isolated and the NMR data was collected. <sup>1</sup>H NMR (400 MHz, CDCl<sub>3</sub>): δ = 7.91 (s, 1H), 7.84 (d, *J* = 8.0 Hz, 1H), 7.65 (d, *J* = 7.8 Hz, 1H), 7.53 (t, *J* = 7.8 Hz, 1H), 6.90 (d, *J* = 33.8 Hz, 1H), 3.91 (s, 3H). <sup>19</sup>F NMR (376 MHz, CDCl<sub>3</sub>): δ = -121.88 (d, *J* = 33.6 Hz). <sup>13</sup>C NMR (100 MHz, CDCl<sub>3</sub>): δ = 161.1 (d, *J* = 34.3 Hz), 148.1 (d, *J* = 271.9 Hz), 134.1 (d, *J* = 8.1 Hz), 133.3 (d, *J* = 8.5 Hz), 132.7 (d, *J* = 2.5 Hz), 132.2 (d, *J* = 4.2 Hz), 129.7, 118.1, 115.2 (d, *J* = 4.3 Hz), 113.3, 52.9. HRMS (ESI, *m/z*): calcd. for C<sub>11</sub>H<sub>9</sub>FNO<sub>2</sub> [M+H]<sup>+</sup>: 206.0617, found: 206.0612.

### methyl 2-fluoro-3-(2-(trifluoromethyl)phenyl)acrylate **2r**

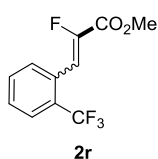

Following general procedure, the reaction mixture was stirred for 48 h and the mixture of *Z*-**2r** and *E*-**2r** was obtained as white solid (19.8 mg, 0.08 mmol, 40%, *Z/E* = 93:7).

*Z*-**2r** was further isolated and the NMR data was collected. <sup>1</sup>H NMR (400 MHz, CDCl<sub>3</sub>): δ = 7.93 (d, *J* = 7.9 Hz, 1H), 7.73 (d, *J* = 7.9 Hz, 1H), 7.60 (dd, *J* = 7.9, 7.6 Hz, 1H), 7.47 (dd, *J* = 7.9, 7.6 Hz, 1H), 7.27 (dq, *J* = 32.2, 1.8 Hz, 1H), 3.92 (s, 3H). <sup>19</sup>F NMR (376 MHz, CDCl<sub>3</sub>): δ = -59.55, -124.11 (d, *J* = 32.0 Hz). <sup>13</sup>C NMR (100 MHz, CDCl<sub>3</sub>): δ = 161.2 (d, *J* = 35.3 Hz), 147.7 (d, *J* = 269.8 Hz), 132.0, 131.5, 131.4, 129.1 (d, *J* = 1.7 Hz), 128.8 (m), 126.1 (q, *J* = 5.6 Hz), 123.8 (q, *J* = 273.9 Hz), 112.8 (d, *J* = 2.1 Hz), 52.9. HRMS (ESI, *m/z*): calcd. for C<sub>11</sub>H<sub>9</sub>F<sub>4</sub>O<sub>2</sub> [M+H]<sup>+</sup>: 249.0539, found: 249.0532.

### methyl 3-([1,1'-biphenyl]-4-yl)-2-fluorobut-2-enoate **2s**

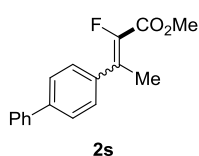

Following general procedure, the reaction mixture was stirred for 96 h and the mixture of *Z*-**2s** and *E*-**2s** was obtained as white solid (43.7 mg, 0.16 mmol, 81%, *Z/E* = 75:25).<sup>[19]</sup>

*Z*-isomer was further isolated and the NMR data was collected. <sup>1</sup>H NMR (400 MHz, CDCl<sub>3</sub>): δ = 7.67 – 7.58 (m, 4H), 7.53 – 7.41 (m, 4H), 7.40 – 7.33 (m, 1H), 3.89 (s, 3H), 2.50 (d, *J* = 3.6 Hz, 3H). <sup>19</sup>F NMR (376 MHz, CDCl<sub>3</sub>): δ = -126.09 (q, *J* = 3.6 Hz). <sup>13</sup>C NMR (100 MHz, CDCl<sub>3</sub>): δ = 162.2 (d, *J* = 34.2 Hz), 143.4 (d, *J* = 254.9 Hz), 141.3, 140.4, 136.4, 130.6 (d, *J* = 10.7 Hz), 128.8, 128.5, 127.6, 127.1, 126.9, 52.2, 18.1. HRMS (ESI, *m/z*): calcd. for C<sub>17</sub>H<sub>16</sub>FO<sub>2</sub> [M+H]<sup>+</sup>: 271.1134, found: 271.1126.

*E*-isomer was further isolated and the NMR data was collected. <sup>1</sup>H NMR (400 MHz, CDCl<sub>3</sub>): δ = 7.63 – 7.59 (m, 4H), 7.46 – 7.43 (m, 2H), 7.37 – 7.34 (m, 1H), 7.28 – 7.26 (m, 2H), 3.66 (s, 3H), 2.20 (d, *J* = 4.6 Hz, 3H). <sup>19</sup>F NMR (376 MHz, CDCl<sub>3</sub>): δ = -123.82 (q, *J* = 4.5 Hz). <sup>13</sup>C NMR (100 MHz, CDCl<sub>3</sub>): δ = 160.0 (d, *J* = 35.5 Hz), 144.0 (d, *J* = 253.6 Hz), 140.7, 140.5, 137.1 (d, *J* = 5.5 Hz), 131.6 (d, *J* = 17.3 Hz), 128.8, 127.9 (d, *J* = 3.2 Hz), 127.4, 127.1, 126.6, 52.0, 19.3 (d, *J* = 6.8 Hz). HRMS (ESI, *m/z*): calcd. for C<sub>17</sub>H<sub>16</sub>FO<sub>2</sub> [M+H]<sup>+</sup>: 271.1134, found: 271.1144.

### methyl 2-fluoro-3-(naphthalen-2-yl)oct-2-enoate **2t**

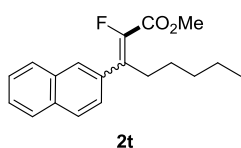

Following general procedure, the reaction mixture was stirred for 96 h and the mixture of *Z*-**2t** and *E*-**2t** was obtained as colorless oil (45.0 mg, 0.15 mmol, 75%, *Z/E* = 63:37).<sup>[20]</sup>

*Z*-**2t** was further isolated and the NMR data was collected. <sup>1</sup>H NMR (400 MHz, CDCl<sub>3</sub>): δ = 7.87 – 7.84 (m, 3H), 7.61 (s, 1H), 7.53 – 7.49 (m, 2H), 7.45 – 7.42 (m, 1H), 3.90 (s, 3H), 3.02 – 2.98 (m, 2H), 1.45 – 1.21 (m, 6H), 0.83 (t, *J* = 7.0 Hz, 3H). <sup>19</sup>F NMR (376 MHz, CDCl<sub>3</sub>): δ = -125.92. <sup>13</sup>C NMR (100 MHz, CDCl<sub>3</sub>): δ = 162.1 (d, *J* = 34.7 Hz), 143.3 (d, *J* = 256.6 Hz), 136.5 (d, *J* = 9.5 Hz), 133.7 (d, *J* = 1.4 Hz), 132.9, 128.2, 127.8,

127.6, 127.5, 127.4, 126.5, 126.3, 125.9 (d,  $J = 2.9$  Hz), 52.2, 31.6, 31.4, 28.1 (d,  $J = 3.1$  Hz), 22.4, 14.0. **HRMS (ESI, m/z)**: calcd. for  $C_{19}H_{21}FO_2$   $[M+Na]^+$ : 323.1423, found: 323.1417.

*E-2t* was further isolated and the NMR data was collected.  **$^1H$  NMR (400 MHz,  $CDCl_3$ )**:  $\delta = 7.89 - 7.88$  (m, 3H), 7.62 (s, 1H), 7.53 - 7.44 (m, 2H), 7.31 - 7.24 (m, 1H), 3.58 (s, 3H), 2.68 - 2.58 (m, 2H), 1.45 - 1.18 (m, 6H), 0.84 (t,  $J = 7.0$  Hz, 3H).  **$^{19}F$  NMR (376 MHz,  $CDCl_3$ )**:  $\delta = -125.66$  (t,  $J = 3.8$  Hz).  **$^{13}C$  NMR (100 MHz,  $CDCl_3$ )**:  $\delta = 161.1$  (d,  $J = 35.8$  Hz), 144.1 (d,  $J = 254.0$  Hz), 136.3 (d,  $J = 16.3$  Hz), 134.5, 134.5, 133.0, 132.7, 128.0, 127.7, 127.5, 126.4 (d,  $J = 2.8$  Hz), 126.3 (d,  $J = 2.5$  Hz), 126.2 (d,  $J = 3.0$  Hz), 52.0, 32.8 (d,  $J = 4.9$  Hz), 31.4, 26.5, 22.3, 14.0. **HRMS (ESI, m/z)**: calcd. for  $C_{19}H_{21}FO_2$   $[M+Na]^+$ : 323.1423, found: 323.1419.

#### methyl (*5E*)-2-fluoro-5-methyl-3-(naphthalen-2-yl)hepta-2,5-dienoate **2u**

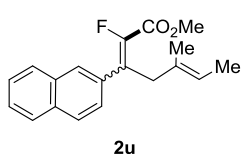

Following general procedure, the reaction mixture was stirred for 96 h and the mixture of *Z-2u* and *E-2u* was obtained as colorless oil (42.3 mg, 0.14 mmol, 72%,  $Z/E = 67:33$ ).<sup>[20]</sup>

*Z-2u* was further isolated and the NMR data was collected.  **$^1H$  NMR (400 MHz,  $CDCl_3$ )**:  $\delta = 7.88 - 7.73$  (m, 4H), 7.54 - 7.40 (m, 3H), 5.24 - 5.15 (m, 1H), 3.90 (s, 3H), 3.73 (m, 2H), 1.61 - 1.57 (m, 3H), 1.54 - 1.44 (m, 3H).  **$^{19}F$  NMR (376 MHz,  $CDCl_3$ )**:  $\delta = -123.73$ .  **$^{13}C$  NMR (100 MHz,  $CDCl_3$ )**:  $\delta = 162.0$  (d,  $J = 34.6$  Hz), 144.3 (d,  $J = 256.8$  Hz), 133.7 (d,  $J = 1.7$  Hz), 133.4, 132.9 (d,  $J = 4.5$  Hz), 131.8, 131.8, 128.3, 127.7 (d,  $J = 3.7$  Hz), 127.6, 127.6, 126.5, 126.2, 126.1 (d,  $J = 3.7$  Hz), 121.0, 52.2, 40.4, 16.0, 13.5. **HRMS (ESI, m/z)**: calcd. for  $C_{19}H_{20}FO_2$   $[M+H]^+$ : 299.1447, found: 299.1444.

*E-2u* was further isolated and the NMR data was collected.  **$^1H$  NMR (400 MHz,  $CDCl_3$ )**:  $\delta = 7.87 - 7.75$  (m, 3H), 7.57 (s, 1H), 7.50 - 7.44 (m, 2H), 7.22 (dd,  $J = 8.4, 1.7$  Hz, 1H), 5.16 - 5.06 (m, 1H), 3.58 (s, 3H), 3.29 (d,  $J = 3.3$  Hz, 2H), 1.60 (s, 3H), 1.48 (dq,  $J = 6.7, 1.2$  Hz, 3H).  **$^{19}F$  NMR (376 MHz,  $CDCl_3$ )**:  $\delta = -124.09$  (t,  $J = 3.9$  Hz).  **$^{13}C$  NMR (100 MHz,  $CDCl_3$ )**:  $\delta = 161.1$  (d,  $J = 36.3$  Hz), 144.6 (d,  $J = 254.9$  Hz), 134.5, 134.4, 133.8 (d,  $J = 15.9$  Hz), 132.9, 132.7, 130.1 (d,  $J = 2.2$  Hz), 128.0, 127.7, 127.2, 126.6 (d,  $J = 3.3$  Hz), 126.4 (d,  $J = 2.9$  Hz), 126.0 (d,  $J = 3.8$  Hz), 122.6, 52.0, 42.7 (d,  $J = 4.5$  Hz), 15.8, 13.5. **HRMS (ESI, m/z)**: calcd. for  $C_{19}H_{20}FO_2$   $[M+H]^+$ : 299.1447, found: 299.1445.

#### methyl 4-cyclohexyl-2-fluoro-3-(naphthalen-2-yl)but-2-enoate **2v**

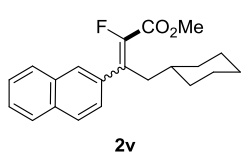

Following general procedure, the reaction mixture was stirred for 96 h and the mixture of *Z-2v* and *E-2v* was obtained as white solid (51.5 mg, 0.16 mmol, 79%,  $Z/E = 60:40$ ).<sup>[20]</sup>

*Z-2v* was further isolated and NMR data was collected.  **$^1H$  NMR (400 MHz,  $CDCl_3$ )**:  $\delta = 7.89 - 7.80$  (m, 3H), 7.62 (s, 1H), 7.54 - 7.46 (m, 2H), 7.27 (dd,  $J = 8.4, 1.8$  Hz, 1H), 3.58 (s, 3H), 2.54 (dd,  $J = 7.2, 4.0$  Hz, 2H), 1.76 - 1.54 (m, 5H), 1.38 - 0.92 (m, 6H).  **$^{19}F$  NMR (376 MHz,  $CDCl_3$ )**:  $\delta = -124.5$ .  **$^{13}C$  NMR (100 MHz,  $CDCl_3$ )**:  $\delta = 162.2$  (d,  $J = 34.8$  Hz), 143.8 (d,  $J = 255.2$  Hz), 135.1 (d,  $J = 9.4$  Hz), 133.9, 133.8, 133.0 (d,  $J = 2.1$  Hz), 128.3, 127.8, 127.6, 127.4 (d,  $J = 3.2$  Hz), 126.5, 126.3, 126.0 (d,  $J = 3.4$  Hz), 52.1, 38.2, 36.6 (d,  $J = 2.8$  Hz), 32.9, 26.2, 26.1. **HRMS (ESI, m/z)**: calcd. for  $C_{21}H_{23}FO_2$   $[M+H]^+$ : 327.1760, found: 327.1765.

*E-2v* was further isolated and NMR data was collected.  **$^1H$  NMR (400 MHz,  $CDCl_3$ )**:  $\delta = 7.90 - 7.82$  (m, 3H), 7.80 (s, 1H), 7.55 - 7.48 (m, 2H), 7.43 (dt,  $J = 8.5, 1.8$  Hz, 1H), 3.89 (s, 3H), 2.99 (dd,  $J = 7.2, 1.9$  Hz, 2H), 1.68 - 1.53 (m, 5H), 1.29 - 0.97 (m, 6H).  **$^{19}F$  NMR (376 MHz,  $CDCl_3$ )**:  $\delta = -124.26$  (t,  $J = 4.0$  Hz).  **$^{13}C$  NMR (100 MHz,  $CDCl_3$ )**:  $\delta = 161.1$  (d,  $J = 36.3$  Hz), 144.7 (d,  $J = 253.9$  Hz), 135.0, 134.8, 134.7 (d,  $J = 5.5$  Hz), 133.0, 132.7, 128.0, 127.7, 127.5, 126.5 (d,  $J = 3.2$  Hz), 126.4 (d,  $J = 2.7$  Hz), 126.2, 52.0, 40.5 (d,  $J = 3.8$  Hz), 35.3 (d,  $J = 2.3$  Hz), 33.0, 26.2, 26.0. **HRMS (ESI, m/z)**: calcd. for  $C_{21}H_{23}FO_2$   $[M+H]^+$ : 327.1760, found: 327.1765.

### methyl 2-fluoro-3-(naphthalen-2-yl)-4-(tetrahydro-2H-pyran-4-yl)but-2-enoate **2w**

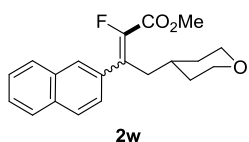

Following general procedure, the reaction mixture was stirred for 96 h and the mixture of *Z*-**2w** and *E*-**2w** was obtained as white solid (55.1 mg, 0.17 mmol, 87%, *Z/E* = 74:26).<sup>[20]</sup>

*Z*-**2w** was further isolated and the NMR data was collected. **<sup>1</sup>H NMR (400 MHz, CDCl<sub>3</sub>):** 7.91 – 7.77 (m, 3H), 7.63 (s, 1H), 7.51 (dt, *J* = 6.2, 3.4 Hz, 2H), 7.27 (dd, *J* = 8.4, 1.8 Hz, 1H), 3.91 (dd, *J* = 11.8, 3.2 Hz, 2H), 3.59 (s, 3H), 3.24 (td, *J* = 11.6, 2.0 Hz, 2H), 2.62 (dd, *J* = 6.8, 3.9 Hz, 2H), 1.62 – 1.47 (m, 3H), 1.46 – 1.32 (m, 2H). **<sup>19</sup>F NMR (376 MHz, CDCl<sub>3</sub>):** δ = -123.64. **<sup>13</sup>C NMR (100 MHz, CDCl<sub>3</sub>):** δ = 161.0 (d, *J* = 36.0 Hz), 145.0 (d, *J* = 255.3 Hz), 134.3, 134.3, 133.7, 133.5, 133.0, 132.8, 128.0, 127.8 (d, *J* = 2.5 Hz), 126.6 (d, *J* = 3.2 Hz), 126.3 (d, *J* = 1.7 Hz), 126.2 (d, *J* = 2.9 Hz), 67.7, 52.0, 39.9 (d, *J* = 4.1 Hz), 32.8 (d, *J* = 2.5 Hz), 32.8. **HRMS (ESI, m/z):** calcd. for C<sub>20</sub>H<sub>21</sub>FO<sub>3</sub> [M+H]<sup>+</sup>: 329.1553, found: 329.1563.

*E*-**2w** was further isolated and NMR data was collected. **<sup>1</sup>H NMR (400 MHz, CDCl<sub>3</sub>):** 7.91 – 7.82 (m, 3H), 7.80 (s, 1H), 7.58 – 7.49 (m, 2H), 7.43 (ddd, *J* = 8.6, 1.8, 1.8 Hz, 1H), 3.90 (s, 3H), 3.86 (dd, *J* = 11.3, 3.7 Hz, 2H), 3.20 (t, *J* = 11.0 Hz, 2H), 3.05 (d, *J* = 5.3 Hz, 2H), 1.58 – 1.44 (m, 3H), 1.44 – 1.28 (m, 2H). **<sup>19</sup>F NMR (376 MHz, CDCl<sub>3</sub>):** δ = -123.15 (t, *J* = 4.0 Hz). **<sup>13</sup>C NMR (100 MHz, CDCl<sub>3</sub>):** δ = 162.1 (d, *J* = 34.6 Hz), 144.1 (d, *J* = 256.8 Hz), 134.0, 133.9, 133.5 (d, *J* = 2.1 Hz), 133.0 (d, *J* = 5.9 Hz), 128.3, 128.0, 127.7, 127.5 (d, *J* = 3.1 Hz), 126.7, 126.4, 125.8 (d, *J* = 3.5 Hz), 67.8, 52.2, 37.6, 34.2 (d, *J* = 3.2 Hz), 32.6. **HRMS (ESI, m/z):** calcd. for C<sub>20</sub>H<sub>21</sub>FO<sub>3</sub> [M+H]<sup>+</sup>: 329.1553, found: 329.1558.

### *tert*-butyl 4-(3-fluoro-4-methoxy-2-(naphthalen-2-yl)-4-oxobut-2-en-1-yl)piperidine-1-carboxylate **2x**

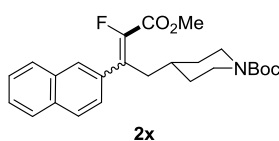

Following general procedure, the reaction mixture was stirred for 96 h and an inseparable mixture of *Z*-**2x** and *E*-**2x** was obtained as white solid (70.0 mg, 0.16 mmol, 82%, *Z/E* = 60:40).<sup>[20]</sup>

*Z*-**2x** **<sup>1</sup>H NMR (400 MHz, CDCl<sub>3</sub>):** δ = 7.90 – 7.82 (m, 3H), 7.63 (s, 1H), 7.55 – 7.47 (m, 2H), 7.28 (d, *J* = 1.7 Hz, 1H), 3.59 (s, 3H), 3.05 (d, *J* = 6.7 Hz, 2H), 2.51 (br, 4H), 1.70 – 1.55 (m, 1H), 1.40 (s, 9H), 1.35 – 1.05 (m, 4H). **<sup>19</sup>F NMR (376 MHz, CDCl<sub>3</sub>):** δ = -123.8. **<sup>13</sup>C NMR (100 MHz, CDCl<sub>3</sub>):** δ = 160.9 (d, *J* = 36.0 Hz), 154.7, 144.9 (d, *J* = 255.4 Hz), 134.2, 134.2, 133.7, 133.6, 132.9, 132.8, 128.0, 127.7, 127.4 (d, *J* = 3.3 Hz), 126.7, 126.6 (d, *J* = 3.3 Hz), 126.1 (d, *J* = 2.8 Hz), 79.2, 52.0, 39.4 (d, *J* = 4.1 Hz), 33.7 (d, *J* = 2.4 Hz), 31.7, 28.4. **HRMS (ESI, m/z):** calcd. for C<sub>25</sub>H<sub>30</sub>FNO<sub>4</sub> [M+Na]<sup>+</sup>: 450.2057, found: 450.2056.

*E*-**2x** **<sup>1</sup>H NMR (400 MHz, CDCl<sub>3</sub>):** δ = 7.90 – 7.82 (m, 3H), 7.81 (s, 1H), 7.55 – 7.48 (m, 2H), 7.43 (dt, *J* = 8.6, 1.8 Hz, 1H), 4.02 (br, 4H), 3.89 (s, 3H), 2.60 (dd, *J* = 7.2, 3.9 Hz, 2H), 1.70 – 1.55 (m, 1H), 1.39 (s, 9H), 1.35 – 1.05 (m, 4H). **<sup>19</sup>F NMR (376 MHz, CDCl<sub>3</sub>):** δ = -123.11 (t, *J* = 4.0 Hz). **<sup>13</sup>C NMR (100 MHz, CDCl<sub>3</sub>):** δ = 162.0 (d, *J* = 34.5 Hz), 154.6, 144.0 (d, *J* = 257.2 Hz), 134.1, 134.0, 133.7, 133.5, 133.0, 132.9, 128.2, 128.0, 127.6 (d, *J* = 8.9 Hz), 126.4, 126.3 (d, *J* = 1.9 Hz), 125.8 (d, *J* = 3.3 Hz), 79.1, 52.2, 37.2, 35.1 (d, *J* = 3.1 Hz), 31.8, 28.4. **HRMS (ESI, m/z):** calcd. for C<sub>25</sub>H<sub>30</sub>FNO<sub>4</sub> [M+Na]<sup>+</sup>: 450.2057, found: 450.2055.

### General procedure for the defluorinative alkenylation of *gem*-difluoroalkene with ketone

To an oven-dried Schlenk tube equipped with a magnetic stir bar was added [Ir(dF(CF<sub>3</sub>)ppy)<sub>2</sub>(dtbbpy)](PF<sub>6</sub>) (2.0 mg, 0.002 mmol, 1.0 mol%), PdCl<sub>2</sub> (1.8 mg, 0.01 mmol, 5.0 mol%), PPh<sub>3</sub> (10.4 mg, 0.04 mmol, 20 mol%) and Cs<sub>2</sub>CO<sub>3</sub> (196 mg, 0.6 mmol, 3.0 equiv) in glovebox. To these solids, compound **1** (0.2 mmol, 1.0 equiv), ketone (0.4 mmol, 2.0 equiv), DMA (2.0 mL), <sup>i</sup>Pr<sub>2</sub>NEt (78 mg, 0.6 mmol, 3.0 equiv) was added under nitrogen atmosphere. Then the Schlenk tube was placed in front of the blue LEDs with 1 cm distance and stirred at ambient temperature for 48 to 96 h. The reaction mixture was quenched with 1N HCl (10 mL) and extracted with ethyl acetate (10 mL × 3). The combined organic layers were washed with water

(10 mL), brine (10 mL) and dried over Na<sub>2</sub>SO<sub>4</sub>. After solvent was removed under reduced pressure, the crude residue was dissolved in Et<sub>2</sub>O (2.0 mL) and MeOH (0.5 mL) and cooled to 0 °C. The Et<sub>2</sub>O solution of TMSCHN<sub>2</sub> (0.2 mL, 2 mol/L, 0.4 mmol, 2.0 equiv) was added at 0 °C. The mixture was stirred at 0 °C for 30 min. The volatile was removed under reduced pressure and the crude residue was purified by column chromatography (petroleum ether/ethyl acetate = 50 : 1) to afford the desired product.

#### 4-(2-fluoro-3-phenylbuta-1,3-dien-1-yl)-1,1'-biphenyl 3a

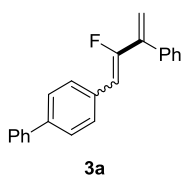

Following general procedure, the reaction mixture was stirred for 48 h and an inseparable mixture of *Z*-**3a** and *E*-**3a** was obtained as white solid (48 mg, 0.12 mmol, 60%, *Z/E* = 67:33).

**Z-3a** <sup>1</sup>H NMR (400 MHz, CDCl<sub>3</sub>): δ = 7.70 – 7.68 (m, 2H), 7.65 – 7.59 (m, 4H), 7.57 – 7.33 (m, 8H), 5.46 (d, *J* = 28.7 Hz, 1H), 5.20 (dd, *J* = 3.4, 1.0 Hz, 1H), 4.96 (dd, *J* = 3.3, 2.4 Hz, 1H). <sup>19</sup>F NMR (376 MHz, CDCl<sub>3</sub>): δ = -82.19 (dd, *J* = 28.7, 2.2 Hz). <sup>13</sup>C NMR (100 MHz, CDCl<sub>3</sub>): δ = 156.8 (d, *J* = 1.7 Hz), 154.3 (d, *J* = 288.7 Hz), 140.6, 139.3 (d, *J* = 2.3 Hz), 133.4, 132.5, 131.4 (d, *J* = 6.5 Hz), 129.3, 128.8, 128.5, 128.1 (d, *J* = 7.2 Hz), 127.2 (d, *J* = 3.7 Hz), 127.2, 126.9, 125.3, 92.3, 91.1 (d, *J* = 19.3 Hz).

**E-3a** <sup>1</sup>H NMR (400 MHz, CDCl<sub>3</sub>): δ = 7.75 – 7.73 (m, 2H), 7.65 – 7.59 (m, 4H), 7.57 – 7.33 (m, 8H), 5.78 (d, *J* = 5.9 Hz, 1H), 5.19 (d, *J* = 3.6 Hz, 1H), 4.93 (dd, *J* = 3.6, 2.4 Hz, 1H). <sup>19</sup>F NMR (376 MHz, CDCl<sub>3</sub>): δ = -82.70 (dd, *J* = 6.1, 2.4 Hz). <sup>13</sup>C NMR (100 MHz, CDCl<sub>3</sub>): δ = 154.8 (d, *J* = 2.7 Hz), 153.5 (d, *J* = 282.6 Hz), 140.6, 139.4 (d, *J* = 1.9 Hz), 133.2, 132.9, 131.1 (d, *J* = 8.3 Hz), 129.4, 128.7, 128.5, 127.8 (d, *J* = 3.6 Hz), 127.2, 127.1 (d, *J* = 6.7 Hz), 126.9, 125.3, 92.7 (d, *J* = 37.7 Hz), 91.2. HRMS (ESI, *m/z*): calcd. for C<sub>22</sub>H<sub>18</sub>F [M+H]<sup>+</sup>: 301.1393, found: 301.1394.

#### 4-(3-(3-bromophenyl)-2-fluorobuta-1,3-dien-1-yl)-1,1'-biphenyl 3b

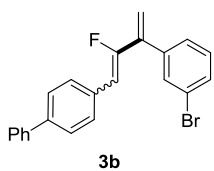

Following general procedure, the reaction mixture was stirred for 48 h and an inseparable mixture of *Z*-**3b** and *E*-**3b** was obtained as white solid (34.8 mg, 0.09 mmol, 46%, *Z/E* = 66:34).

**Z-3b** <sup>1</sup>H NMR (400 MHz, CDCl<sub>3</sub>): δ = 7.80 (dd, *J* = 1.9, 1.9 Hz, 1H), 7.66 – 7.37 (m, 9H), 7.37 – 7.31 (m, 1H), 7.30 – 7.22 (m, 2H), 5.45 (d, *J* = 28.6 Hz, 1H), 5.22 – 5.11 (m, 1H), 4.99 – 4.88 (m, 1H). <sup>19</sup>F NMR (376 MHz, CDCl<sub>3</sub>): δ = -82.66 (dd, *J* = 28.6, 2.2 Hz). <sup>13</sup>C NMR (100 MHz, CDCl<sub>3</sub>): δ = 155.4 (d, *J* = 2.1 Hz), 153.8 (d, *J* = 289.7 Hz), 140.6, 139.6 (d, *J* = 2.3 Hz), 135.5, 132.2, 131.1 (d, *J* = 6.5 Hz), 130.0, 128.8, 128.4, 128.2 (d, *J* = 7.2 Hz), 127.3, 127.2, 126.9, 123.9, 122.7, 93.0, 91.7 (d, *J* = 19.1 Hz).

**E-3b** <sup>1</sup>H NMR (400 MHz, CDCl<sub>3</sub>): δ = 7.84 (dd, *J* = 2.0, 2.0 Hz, 1H), 7.66 – 7.37 (m, 9H), 7.37 – 7.31 (m, 1H), 7.30 – 7.22 (m, 2H), 5.77 (d, *J* = 5.9 Hz, 1H), 5.22 – 5.11 (m, 1H), 4.99 – 4.88 (m, 1H). <sup>19</sup>F NMR (376 MHz, CDCl<sub>3</sub>): δ = -83.34 (dd, *J* = 6.0, 2.1 Hz). <sup>13</sup>C NMR (100 MHz, CDCl<sub>3</sub>): δ = 154.6, 153.5 (d, *J* = 2.9 Hz), 151.8, 140.5, 139.6 (d, *J* = 2.0 Hz), 135.3, 132.3, 130.8 (d, *J* = 8.2 Hz), 130.0, 128.8, 128.5, 127.9 (d, *J* = 3.6 Hz), 127.3, 127.3, 126.9, 124.0, 122.7, 93.04 (d, *J* = 37.0 Hz). HRMS (ESI, *m/z*): calcd. for C<sub>22</sub>H<sub>17</sub>BrF [M+H]<sup>+</sup>: 379.0498, found: 379.0493.

A mechanistic rationale for the fluoro-diene **3** formation was delineated in Figure S2. Similar as the mechanism for the defluorinative carboxylation, an alcohol intermediate **G** is generated and undergoes dehydration immediately to afford the product **3**.

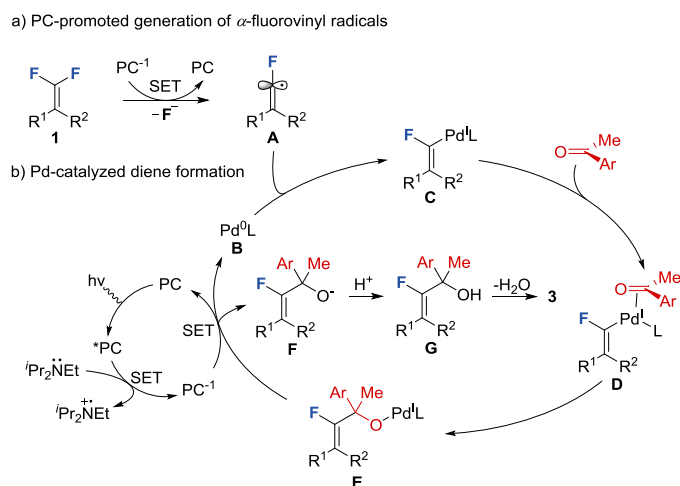

**Figure S2.** Proposed mechanism for the formation of compound **3**

## 5. Mechanistic Study

### 5.1 Attempt with 2-(2-bromo-2-fluorovinyl)naphthalene **4**

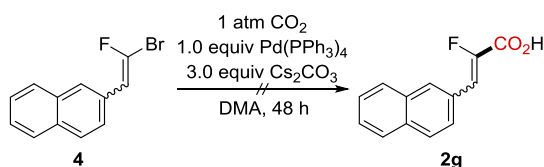

To an oven-dried Schlenk tube equipped with a magnetic stir bar was added Pd(PPh<sub>3</sub>)<sub>4</sub> (231 mg, 0.2 mmol, 1.0 equiv) and Cs<sub>2</sub>CO<sub>3</sub> (196 mg, 0.6 mmol, 3.0 equiv) in glovebox. To these solids, compound **4** (50 mg, 0.2 mmol, 1.0 equiv) and DMA (2.0 mL) were added under nitrogen atmosphere. The Schlenk tube was evacuated and filled with CO<sub>2</sub> (3 cycles). Then the reaction mixture was stirred at ambient temperature for 48 h. The reaction mixture was quenched with 1N HCl (10 mL) and extracted with ethyl acetate (10 mL × 3). The combined organic layers were washed with water (10 mL), brine (10 mL) and dried over Na<sub>2</sub>SO<sub>4</sub>. After solvent was removed under reduced pressure, the <sup>19</sup>F NMR analysis of the crude residue indicated no **2a** was formed.

### 5.2 Radical scavengers and radical trapping studies

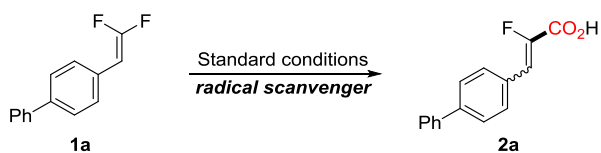

| Entry | Radical scavenger  | Conversion/% <sup>a</sup> | Yield/% <sup>[a]</sup> |      |
|-------|--------------------|---------------------------|------------------------|------|
|       |                    |                           | Z-2a                   | E-2a |
| 1     | 1.0 equiv of TEMPO | 85                        | 39                     | 4    |
| 2     | 2.0 equiv of TEMPO | 80                        | 13                     | 2    |
| 3     | 1.0 equiv of BHT   | 100                       | 64                     | 7    |
| 4     | 2.0 equiv of BHT   | 98                        | 32                     | 6    |

[a] NMR Yield.

To an oven-dried Schlenk tube equipped with a magnetic stir bar was added [Ir(dF(CF<sub>3</sub>)ppy)<sub>2</sub>(dtbbpy)](PF<sub>6</sub>) (2.0 mg, 0.002 mmol, 1.0 mol%), PdCl<sub>2</sub> (1.8 mg, 0.01 mmol, 5.0 mol%), PPh<sub>3</sub> (10.4 mg, 0.04 mmol, 20 mol%) and Cs<sub>2</sub>CO<sub>3</sub> (196 mg, 0.6 mmol, 3.0 equiv) in glovebox. To these solids, compound **1a** (0.2 mmol, 1.0 equiv), radical scavenger, DMA (2.0 mL), <sup>t</sup>Pr<sub>2</sub>NEt (0.6 mmol, 3.0 equiv) were added under nitrogen atmosphere. The reaction mixture was evacuated and filled with CO<sub>2</sub> (3 cycles). Then the Schlenk tube was placed in front of blue LEDs with 1 cm distance and stirred at ambient temperature for 48 h. The reaction mixture was quenched with 1N HCl (10 mL) and extracted with ethyl acetate (10 mL × 3). The combined organic layers were washed with water (10 mL), brine (10 mL) and dried over Na<sub>2</sub>SO<sub>4</sub>. After solvent was removed under reduced pressure, the crude residue analyzed by <sup>19</sup>F NMR.

### 5.3 Reaction in the presence of Hantzsch ester

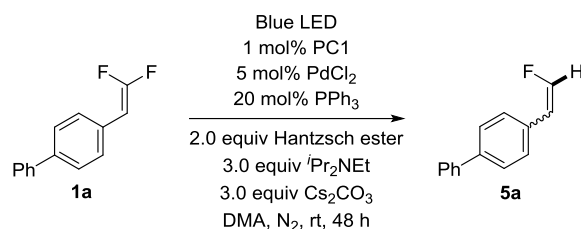

To an oven-dried Schlenk tube equipped with a magnetic stir bar was added [Ir(dF(CF<sub>3</sub>)ppy)<sub>2</sub>(dtbbpy)](PF<sub>6</sub>) (2.0 mg, 0.002 mmol, 1.0 mol%), PdCl<sub>2</sub> (1.8 mg, 0.01 mmol, 5.0 mol%), PPh<sub>3</sub> (10.4 mg, 0.04 mmol, 20 mol%) and Cs<sub>2</sub>CO<sub>3</sub> (196 mg, 0.6 mmol, 3.0 equiv) in glovebox. To these solids, compound **1a** (0.2 mmol, 1.0 equiv), Hantzsch ester (51 mg, 0.4 mmol, 2.0 equiv), DMA (2.0 mL), <sup>t</sup>Pr<sub>2</sub>NEt (0.6 mmol, 3.0 equiv) were added under nitrogen atmosphere. Then the Schlenk tube was placed in front of blue LEDs with 1 cm distance and stirred at ambient temperature for 48 h. The reaction mixture was quenched with 1N HCl (10 mL) and extracted with ethyl acetate (10 mL × 3). The combined organic layers were washed with water (10 mL), brine (10 mL) and dried over Na<sub>2</sub>SO<sub>4</sub>. After solvent was removed under reduced pressure, <sup>19</sup>F NMR analysis of the crude residue indicated **5a** was formed in 17% yield with 18:82 *Z/E* ratio. Then the crude product was purified by column chromatography on silica gel (hexane only) to afford **5a** (7.1 mg, 0.036 mmol) in 18% yield as a white solid. The NMR data is in accordance with the literature.<sup>[21]</sup>

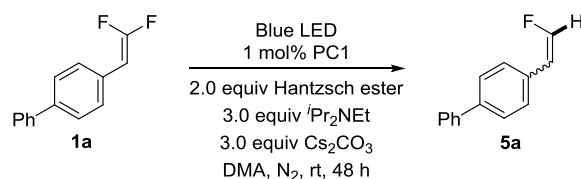

To an oven-dried Schlenk tube equipped with a magnetic stir bar was added [Ir(dF(CF<sub>3</sub>)ppy)<sub>2</sub>(dtbbpy)](PF<sub>6</sub>) (2.0 mg, 0.002 mmol, 1.0 mol%), and Cs<sub>2</sub>CO<sub>3</sub> (196 mg, 0.6 mmol, 3.0 equiv) in glovebox. To these solids, compound **1a** (0.2 mmol, 1.0 equiv), Hantzsch ester (51 mg, 0.4 mmol, 2.0 equiv), DMA (2.0 mL), <sup>t</sup>Pr<sub>2</sub>NEt (0.6 mmol, 3.0 equiv) were added under nitrogen atmosphere. Then the Schlenk tube was placed in front of blue LEDs with 1 cm distance and stirred at ambient temperature for 48 h. The reaction mixture was quenched with 1N HCl (10 mL) and extracted with ethyl acetate (10 mL × 3). The combined organic layers were washed with water (10 mL), brine (10 mL) and dried over Na<sub>2</sub>SO<sub>4</sub>. After solvent was removed under reduced pressure, <sup>19</sup>F NMR analysis of the crude residue indicated **5a** was formed in 16% yield with 25:75 *Z/E* ratio.



### 5.3 Reaction in the presence of D<sub>2</sub>O

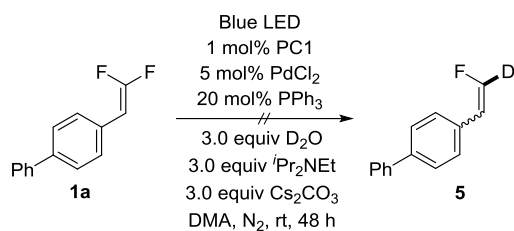

To an oven-dried Schlenk tube equipped with a magnetic stir bar was added [Ir(dF(CF<sub>3</sub>)ppy)<sub>2</sub>(dtbbpy)](PF<sub>6</sub>) (2.0 mg, 0.002 mmol, 1.0 mol%), PdCl<sub>2</sub> (1.8 mg, 0.01 mmol, 5.0 mol%), PPh<sub>3</sub> (10.4 mg, 0.04 mmol, 20 mol%) and Cs<sub>2</sub>CO<sub>3</sub> (196 mg, 0.6 mmol, 3.0 equiv) in glovebox. To these solids, compound **1a** (0.2 mmol, 1.0 equiv), D<sub>2</sub>O (32 mg, 0.6 mmol, 3.0 equiv), DMA (2.0 mL), <sup>i</sup>Pr<sub>2</sub>NEt (0.6 mmol, 3.0 equiv) were added under nitrogen atmosphere. Then the Schlenk tube was placed in front of blue LEDs with 1 cm distance and stirred at ambient temperature for 48 h. The reaction mixture was quenched with 1N HCl (10 mL) and extracted with ethyl acetate (10 mL × 3). The combined organic layers were washed with water (10 mL), brine (10 mL) and dried over Na<sub>2</sub>SO<sub>4</sub>. After solvent was removed under reduced pressure, the crude residue analyzed by <sup>19</sup>F NMR with trifluoromethylbenzene as internal standard and the result indicated that no compound **5** formed while the 58% of **1a** remained.

### 5.4 Cyclic voltammetry experiments

Cyclic voltammograms were recorded on a CH Instruments 600E potentiostat using a glassy carbon working electrode, a saturated calomel (SCE) reference electrode, and a Pt mesh counter electrode. The pH was not adjusted and voltammograms were taken at room temperature in a 100 mM DMA solution of tetrabutylammonium hexafluorophosphate containing 10 mM of **1a**. The scan rate was 100 mV/s. The reduction potentials of **1a** was measured as -0.80 and -1.53 V which are attributed to the single electron reduction of *gem*-difluoroalkene and the the C–F bond cleavage respectively according to the literature (Figure S2).<sup>[22]</sup> [Ir(dF(CF<sub>3</sub>)ppy)<sub>2</sub>(dtbbpy)]<sup>+</sup> (E<sub>1/2</sub>[Ir<sup>II</sup>/Ir<sup>III</sup>] = -1.37 V vs SCE),<sup>[23]</sup> reduction of **1a** by the reduced form of PC I is thermodynamically feasible.

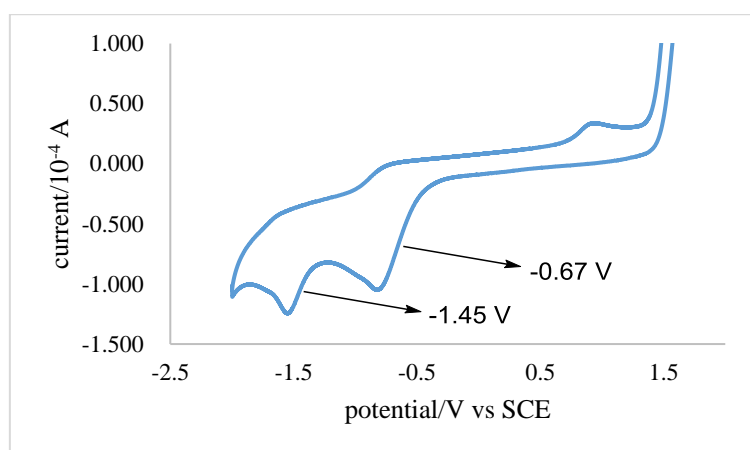

Figure S3. Cyclic voltammogram of **1a**

### 5.5 Proposed Mechanism

A plausible mechanism including the following steps was proposed: 1) fluorovinyl radical formation through single electron reduction by reduced PC; 2) combination to Pd-catalyst to generate Pd(I) complex **C**; 3) coordination of CO<sub>2</sub> to intermediate

**C**; 4) subsequent carboxylation to produce palladium carboxylate **E**; 5) final reduction of **E** by  $PC^{-1}$  to afford desired product and regenerate  $Pd(0)$  catalyst (left). The other reaction pathway involved  $Pd(I)/Pd(II)$  was also possible for this reaction (right). In this manifold, the fluorovinyl radical was captured by  $Pd(I)$  species **B'** to generate fluoroalkenyl- $Pd$  **C'**, to which  $CO_2$  was bounded to form intermediate **D'**. Then single electron reduction and migratory insertion occurred to yield desired product **2** and regenerate catalytically active  $Pd(I)$ .

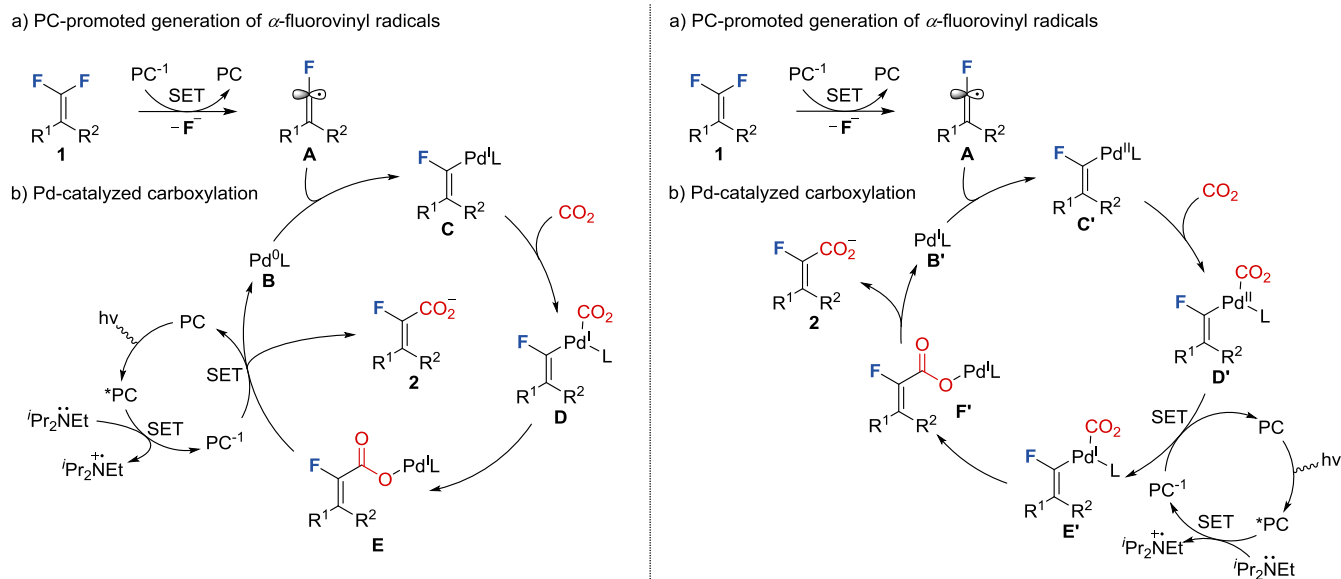

**Figure S4.** Proposed mechanism

## 6. References

- [1] G. J. Choi, Q. Zhu, D. C. Miller, C. J. Gu, R. R. Knowles, *Nature* **2016**, *539*, 268–271.
- [2] M. S. Lowry, J. I. Goldsmith, J. D. Slinker, R. Rohl, R. A. Pascal, G. G. Malliaras, S. Bernhard, *Chem. Mater.* **2005**, *17*, 5712–5719.
- [3] D. N. Primer, I. Karakaya, J. C. Tellis, G. A. Molander, *J. Am. Chem. Soc.* **2015**, *137*, 2195–2198.
- [4] H. Liu, L. Ge, D.-X. Wang, N. Chen, C. Feng, *Angew. Chem. Int. Ed.* **2019**, *58*, 3918–3922.
- [5] H. Sakaguchi, Y. Uetake, M. Ohashi, T. Niwa, S. Ogoshi, T. Hosoya, *J. Am. Chem. Soc.* **2017**, *139*, 12855–12862.
- [6] L. Yu, M.-L. Tang, C.-M. Si, Z. Meng, Y. Liang, J. Han, X. Sun, *Org. Lett.* **2018**, *20*, 4579–4583.
- [7] R. T. Thornbury, F. D. Toste, *Angew. Chem. Int. Ed.* **2016**, *55*, 11629–11632.
- [8] J. Zheng, J. Cai, J.-H. Lin, Y. Guo, J.-C. Xiao, *Chem. Commun.* **2013**, *49*, 7513–7515.
- [9] J. Hu, X. Han, Y. Yuan, Z. Shi, *Angew. Chem. Int. Ed.* **2017**, *56*, 13342–13346.
- [10] P. S. Bhadury, M. Palit, M. Sharma, S. K. Raza, D. K. Jaiswal, *J. Fluor. Chem.* **2002**, *116*, 75–80.
- [11] X. Lei, G. Dutheuil, X. Pannecoucke, J.-C. Quirion, *Org. Lett.* **2004**, *6*, 2101–2104.
- [12] H. Salemi, B. Kaboudin, F. Kazemi and T. Yokomatsu, *RSC Adv.* **2016**, *6*, 52656–52664
- [13] S. C. Leung, P. Gibbons, R. Amewu, G. L. Nixon, C. Pidathala, W. D. Hong, B. Pacorel, N. G. Berry, R. Sharma, P. A. Stocks, A. Srivastava, A. E. Shone, S. Charoensutthivarakul, L. Taylor, O. Berger, A. Mbekeani, A. Hill, N. E. Fisher, A. J. Warman, G. A. Biagini, S. A. Ward, P. M. O'Neill, *J. Med. Chem.* **2012**, *55*, 1844–1857.
- [14] C.-W. Zhao, J.-P. Ma, Q.-K. Liu, Y. Yu, P. Wang, Y.-A. Li, K. Wang, Y.-B. Dong, *Green Chem.* **2013**, *15*, 3150–3154.
- [15] J.-P. Bégué, D. Bonnet-Delpon, M. H. Rock, *Tetrahedron Lett.* **1995**, *36*, 5003–5006.
- [16] X. Wang, Y. Xu, Y. Deng, Y. Zhou, J. Feng, G. Ji, Y. Zhang, J. Wang, *Chem. Eur. J.* **2014**, *20*, 961–965.
- [17] T. Ichitsuka, T. Fujita, J. Ichikawa, *ACS Catal.* **2015**, *5*, 5947–5950.
- [18] Y. Lan, F. Yang, C. Wang, *ACS Catal.* **2018**, *8*, 9245–9251.
- [19] The configuration of **2s** was determined according to the similar structure as reported: M. Engman, J. S. Diesen, A. Paptchikhine, P. G. Andersson, *J. Am. Chem. Soc.* **2007**, *129*, 4536–4537.
- [20] The configuration of **2t-x** were determined according to the similar structure as reported: K. Rousée, J.-P. Bouillon, S. Couve-Bonnaire, X. Pannecoucke, *Org. Lett.* **2016**, *18*, 540–543.
- [21] R. Kojima, K. Kubota, H. Ito, *Chem. Commun.* **2017**, *53*, 10688–10691.
- [22] J. Xie, J. Yu, M. Rudolph, F. Rominger, and A. S. K. Hashmi, *Angew. Chem. Int. Ed.* **2016**, *55*, 9416–9421.
- [23] M. S. Lowry, J. I. Goldsmith, J. D. Slinker, R. Rohl, R. A. Pascal, G. G. Malliaras, S. Bernhard, *Chem. Mater.* **2005**, *17*, 5712–5719.

## 7. NMR spectra

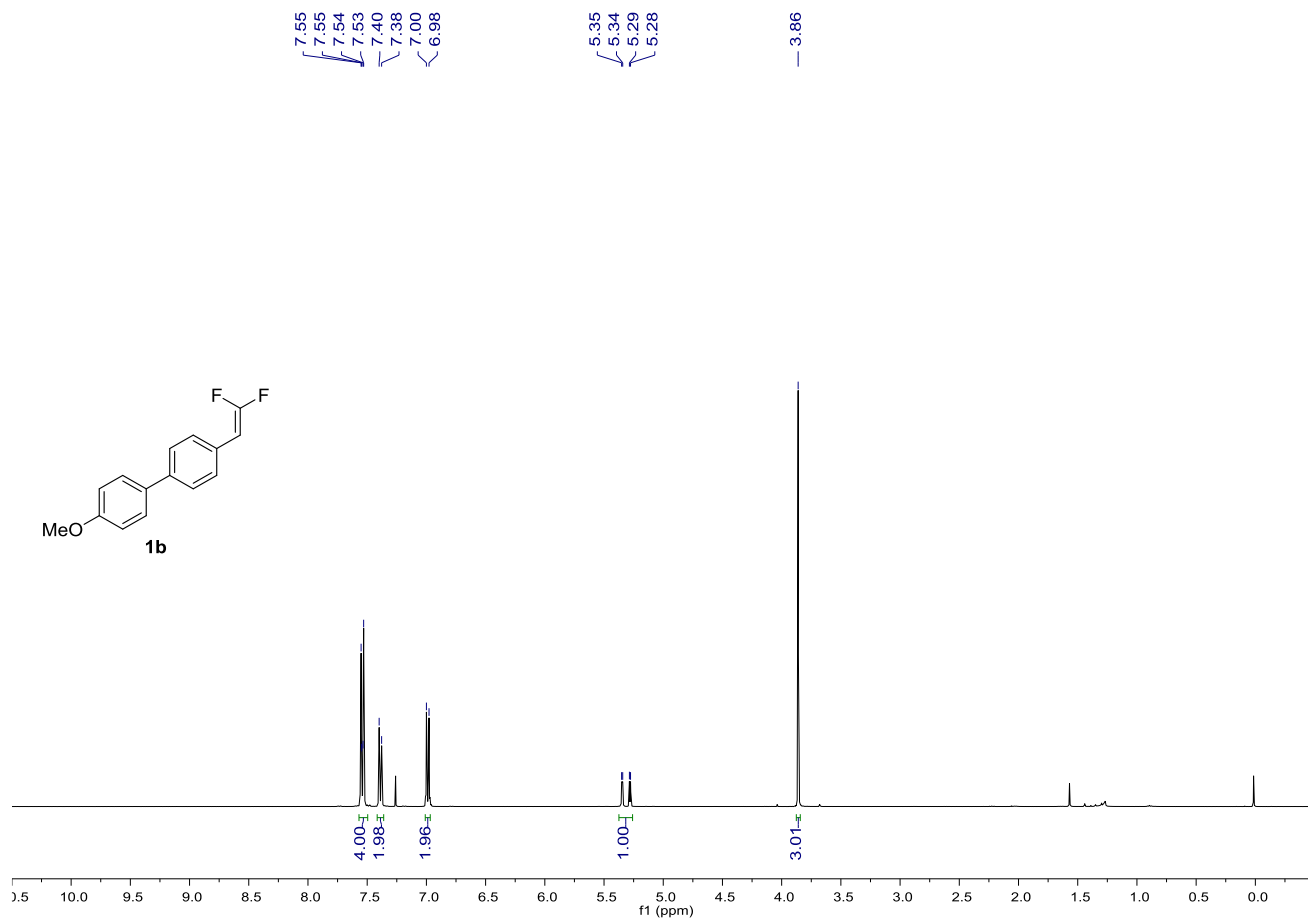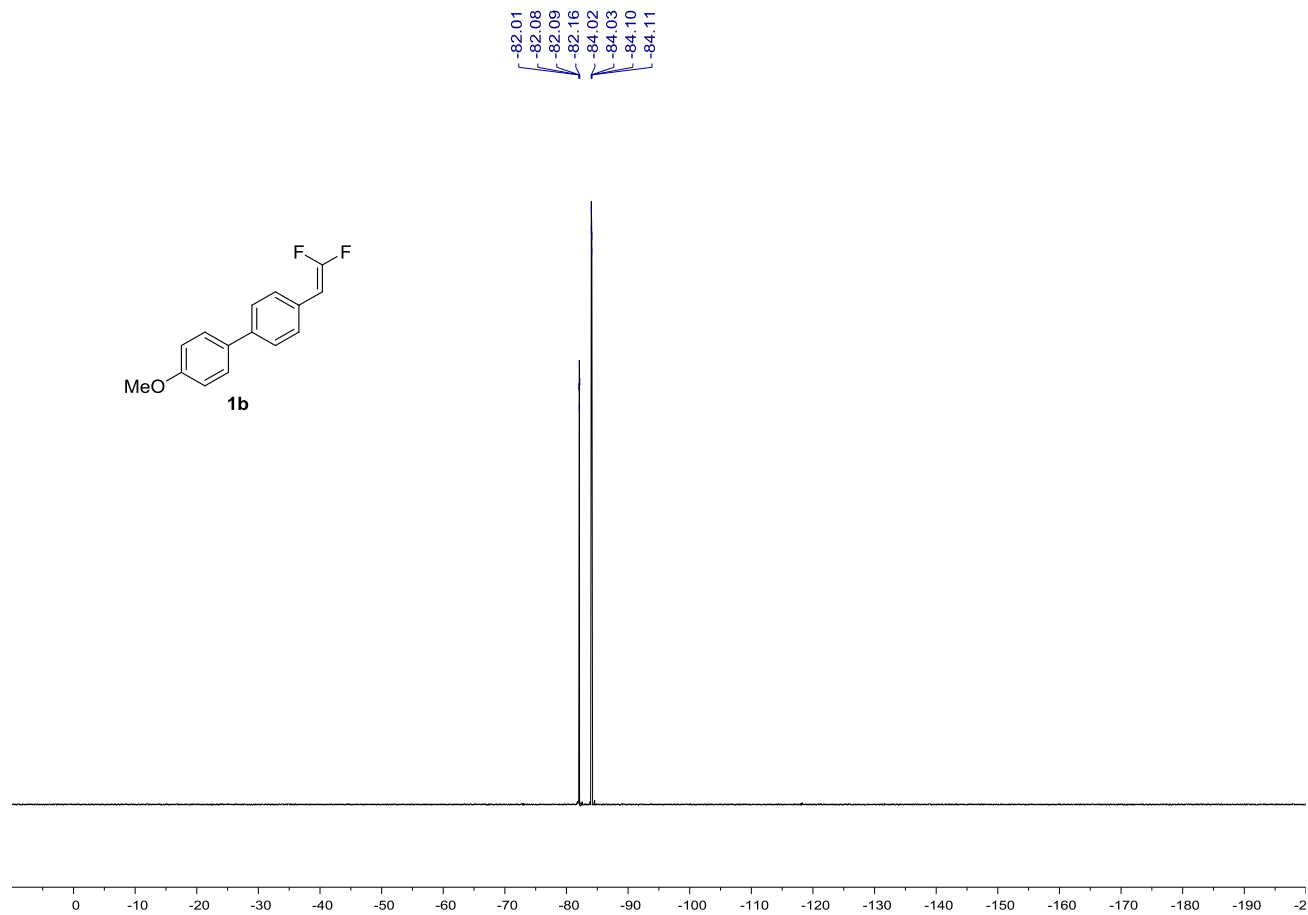

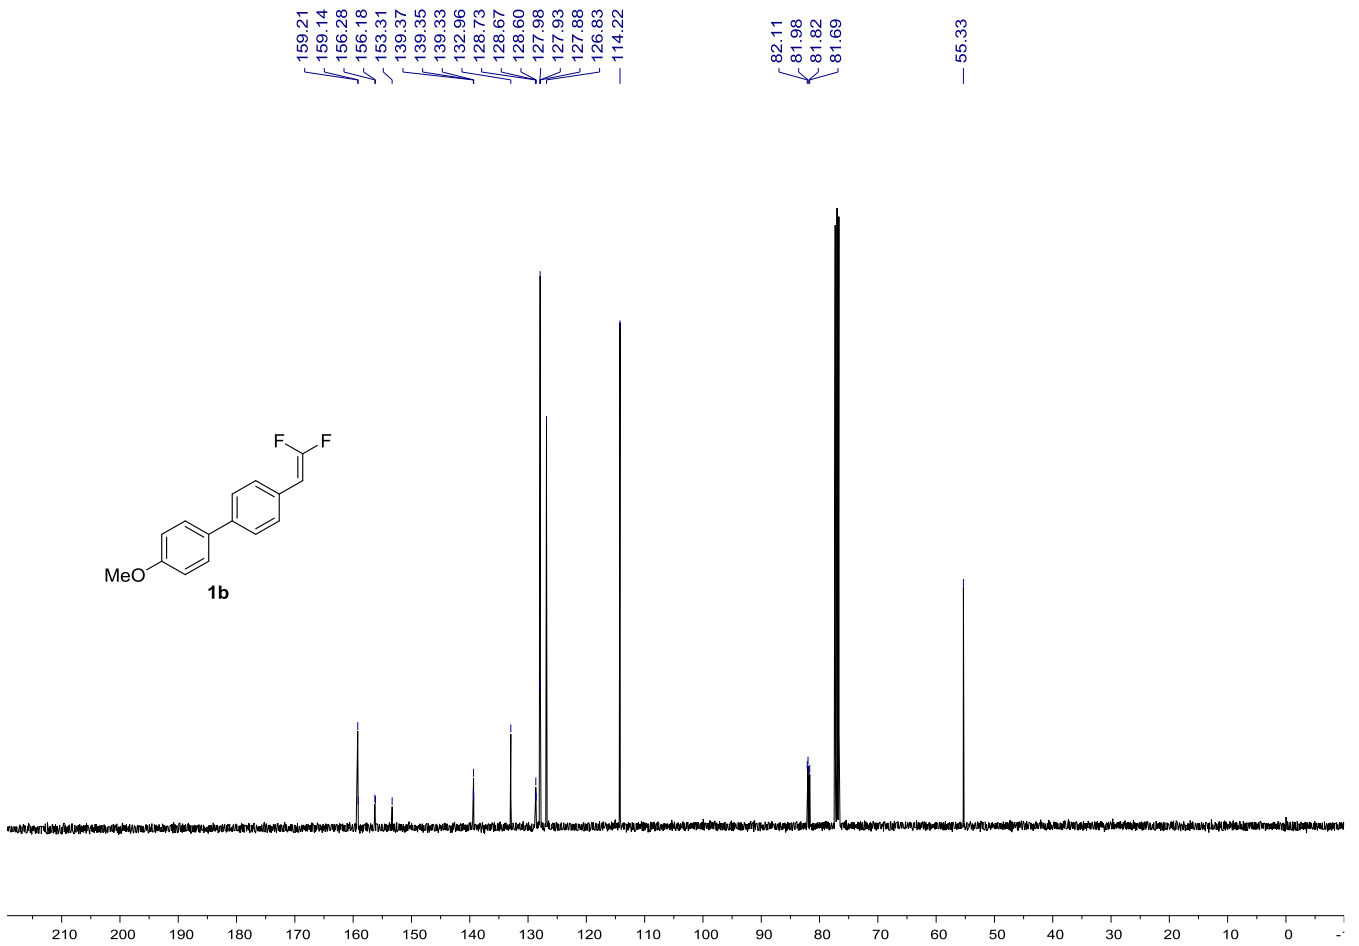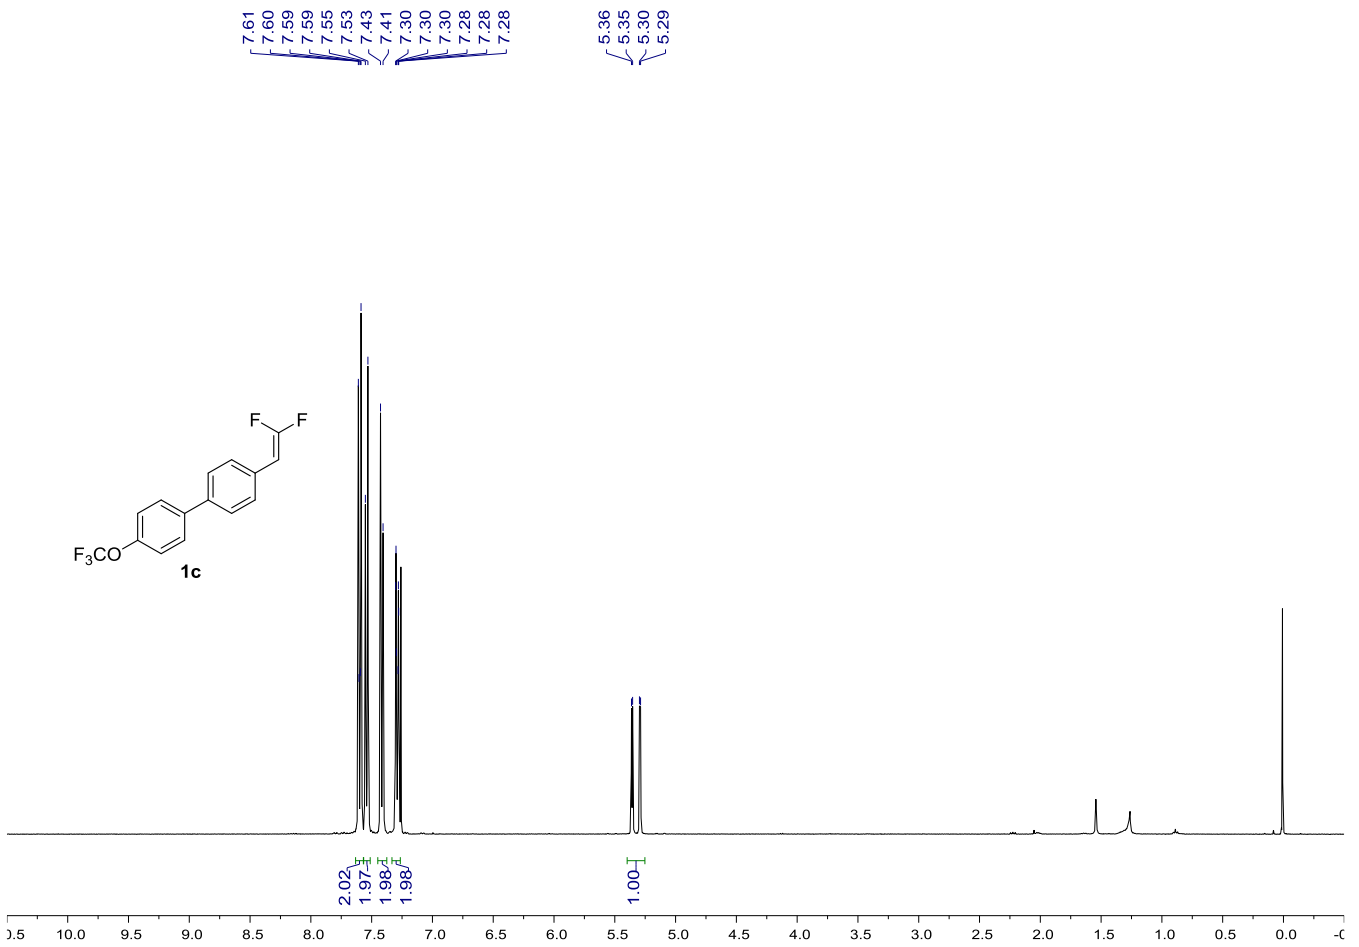

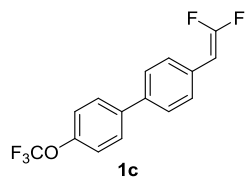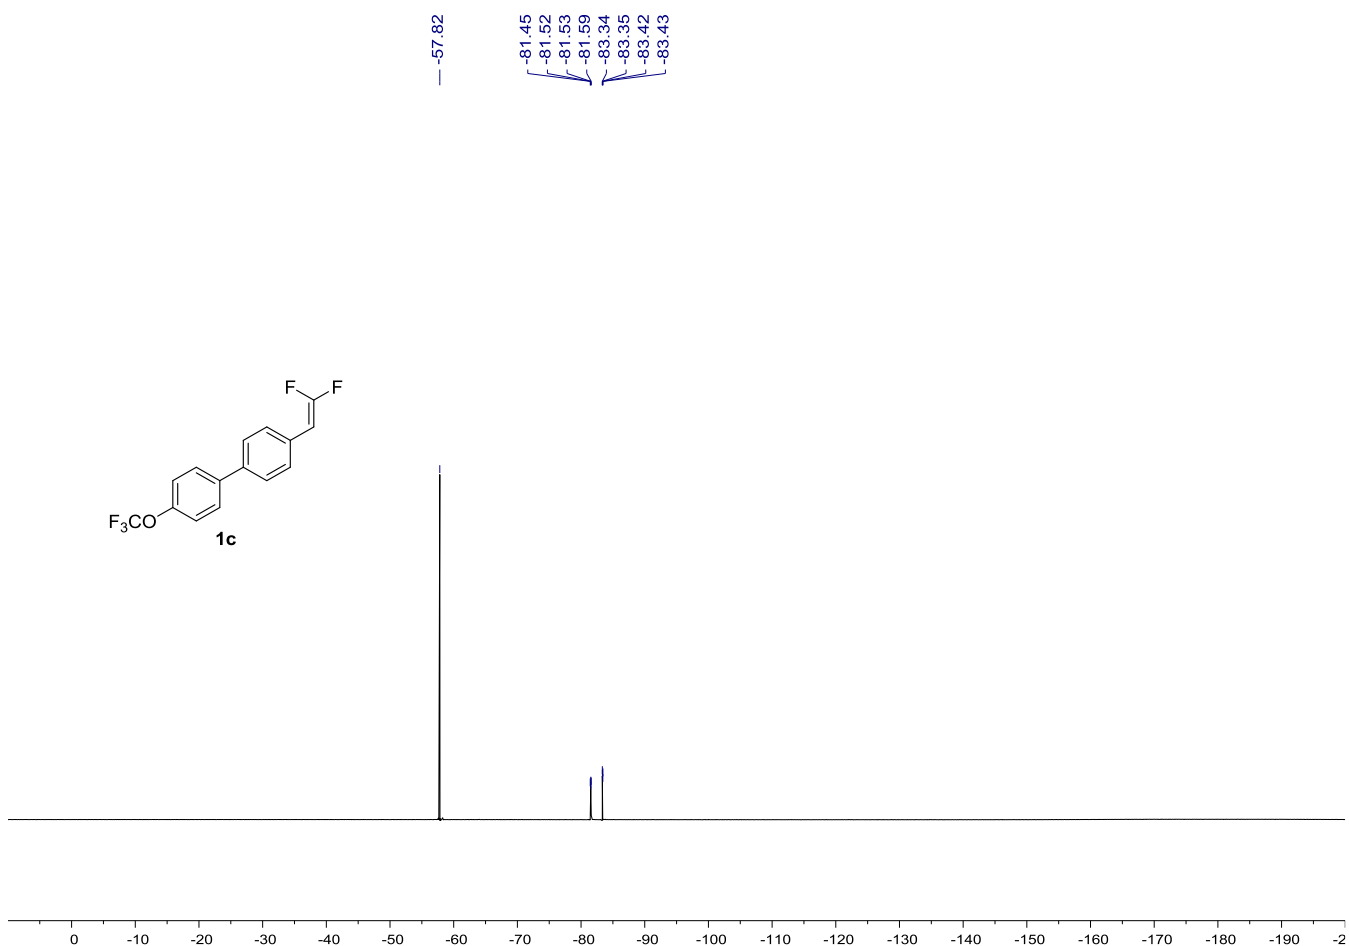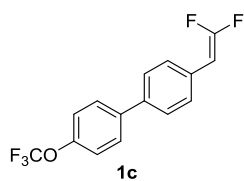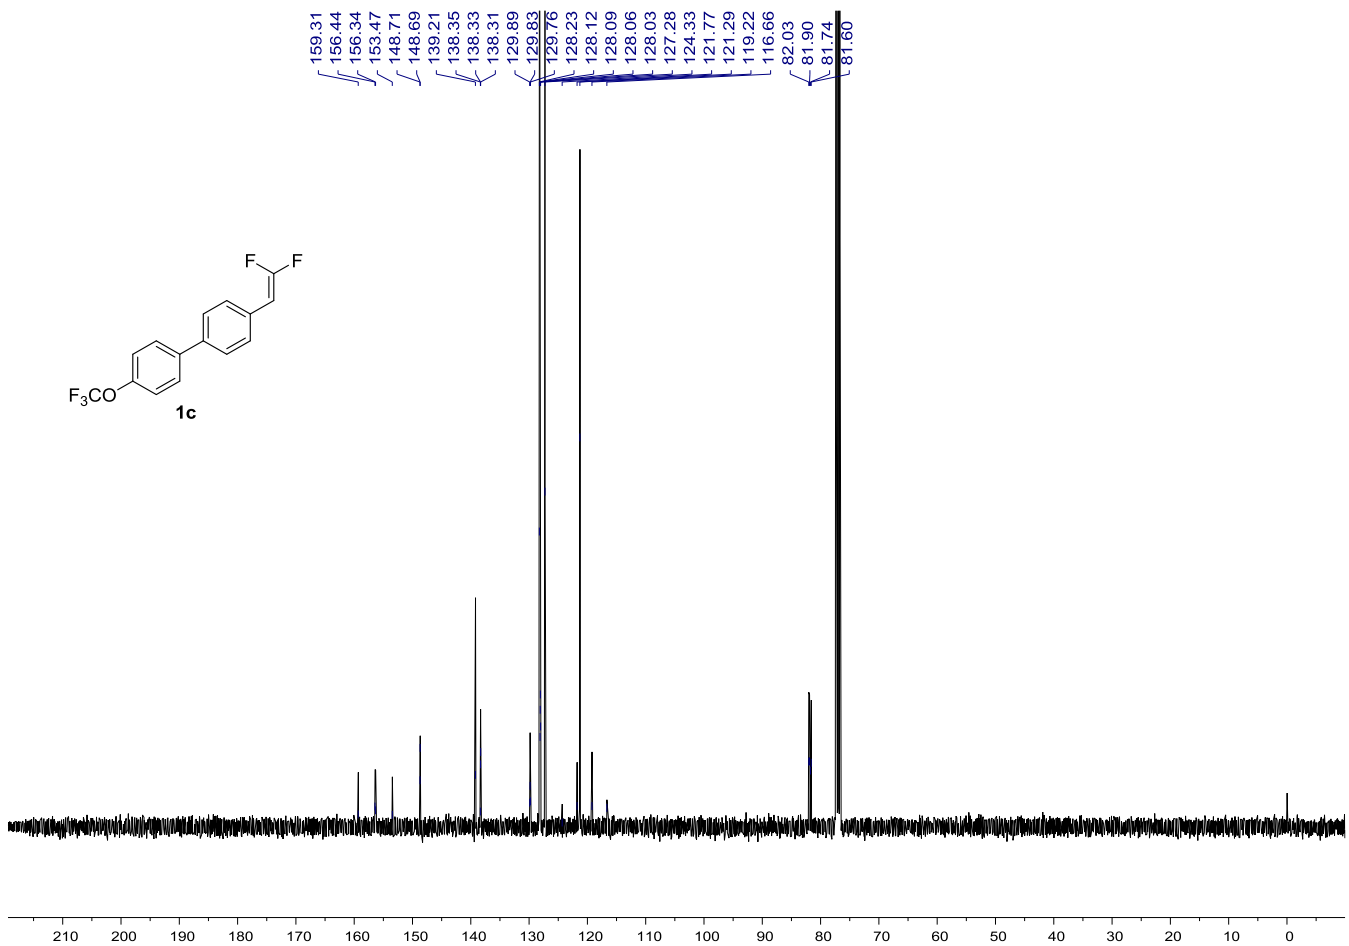

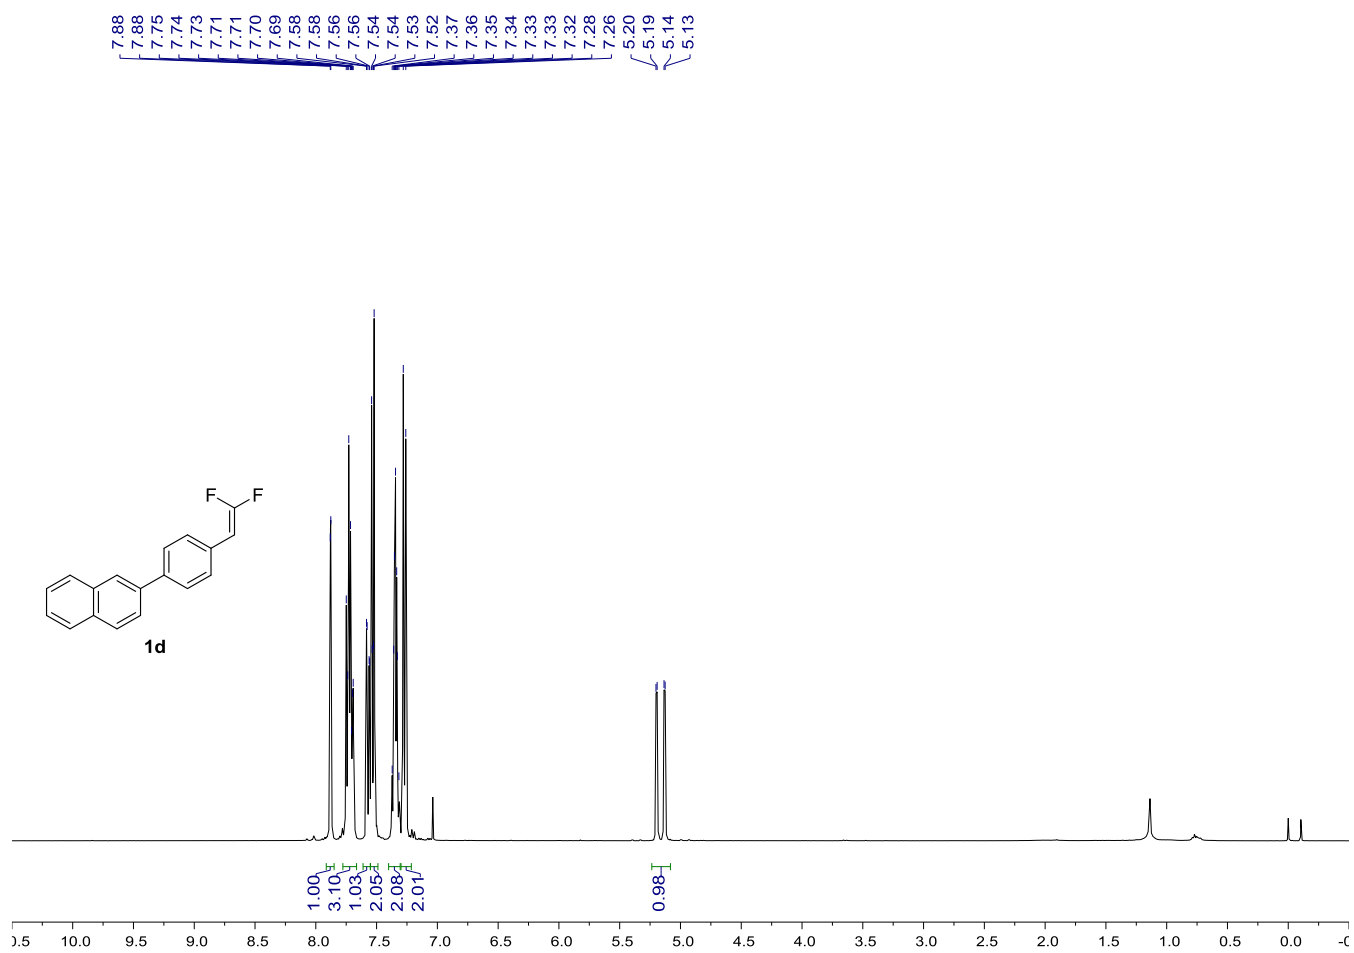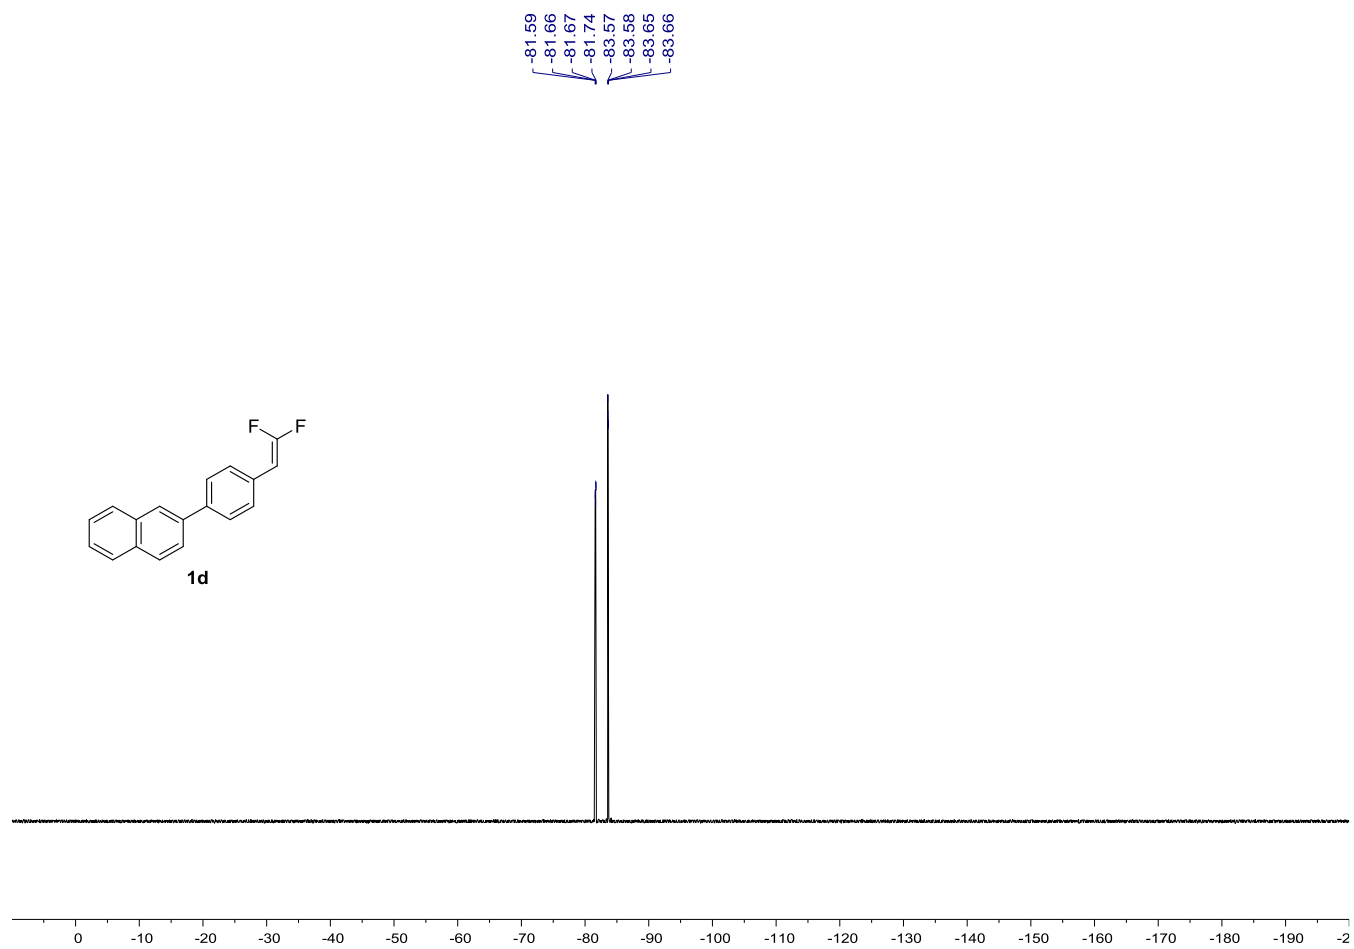

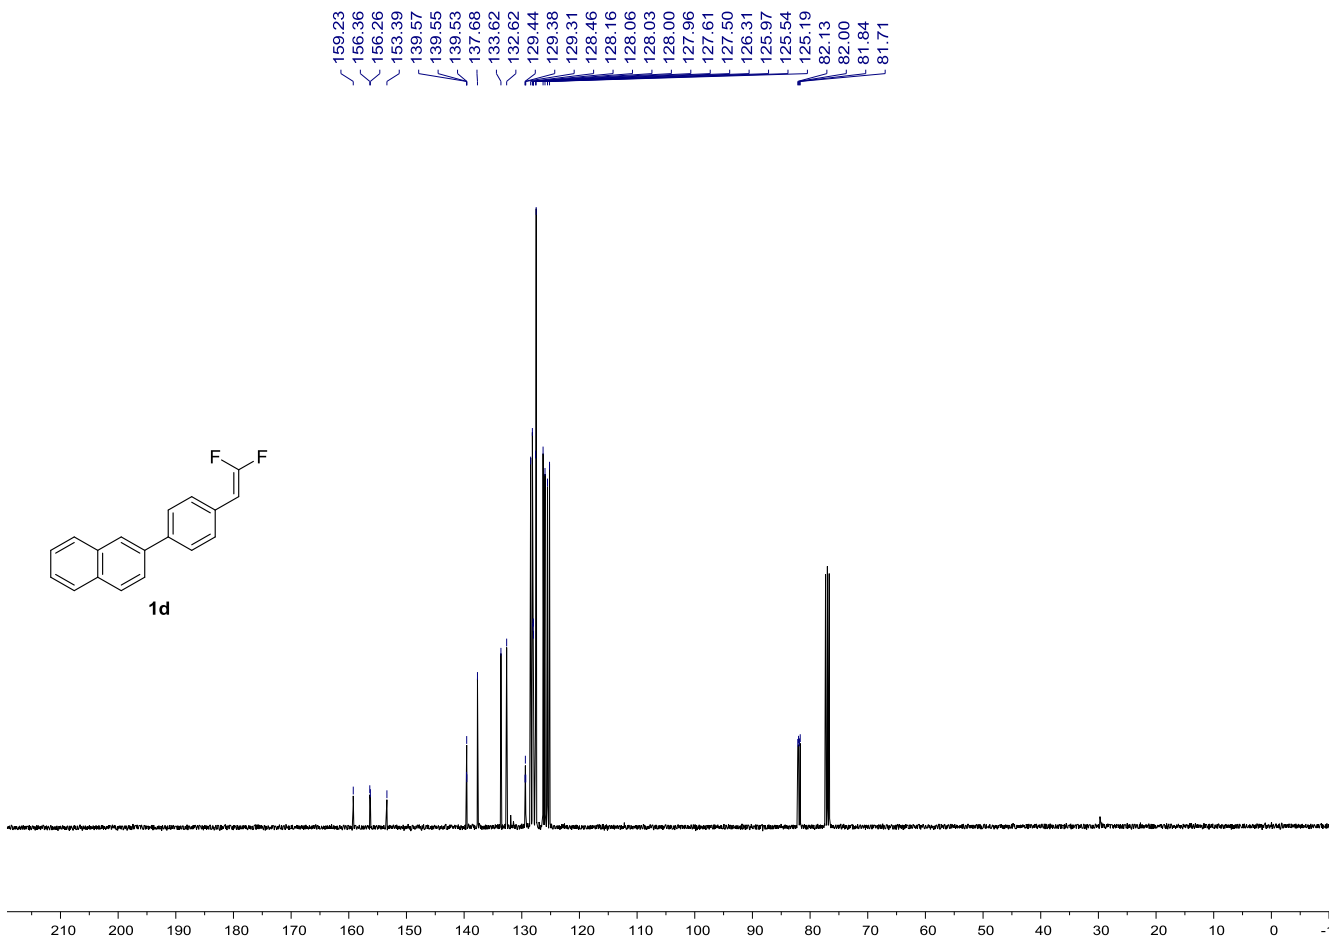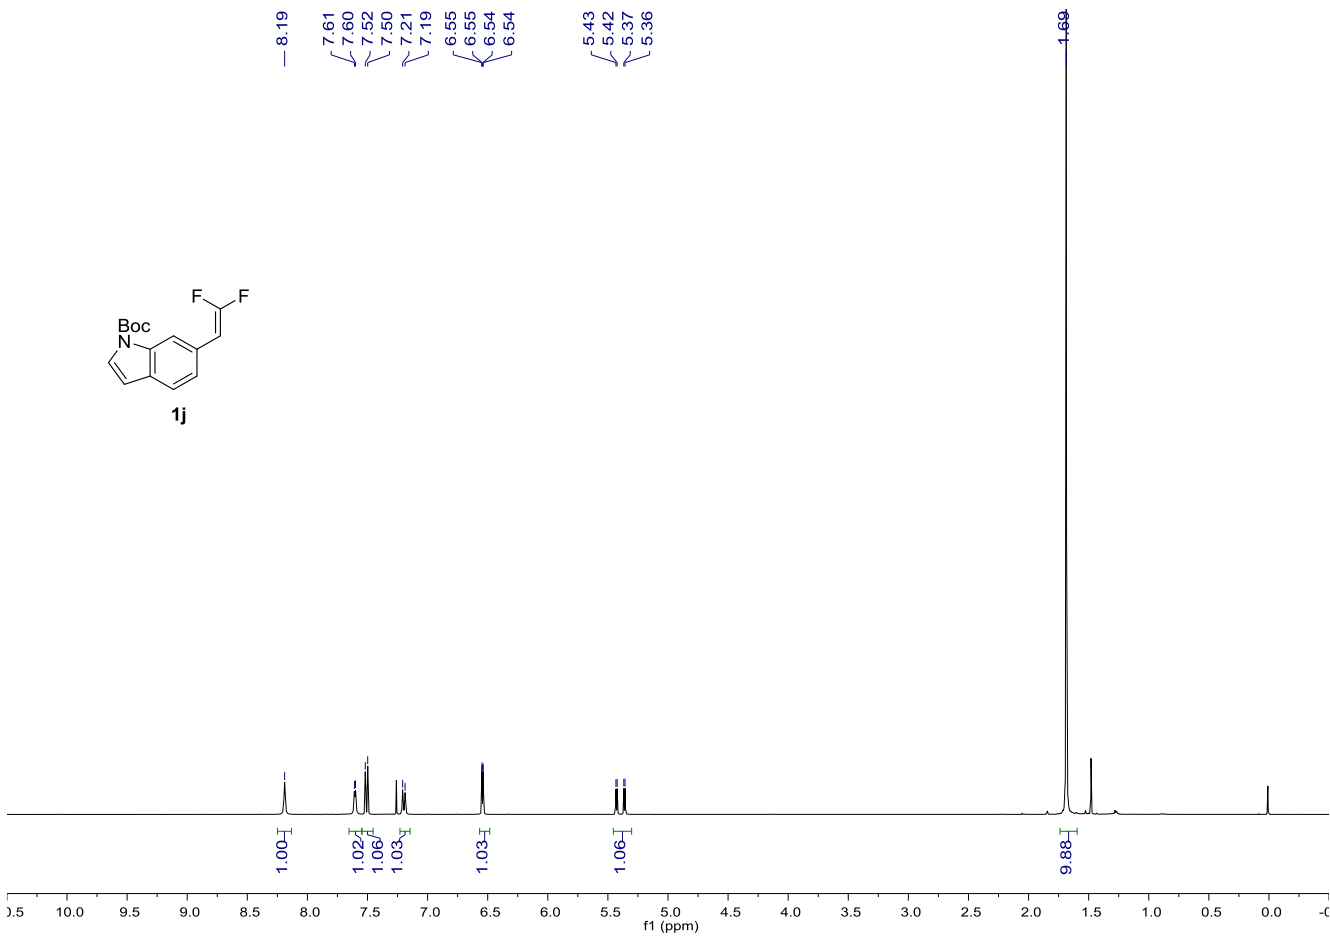



-82.88  
-82.95  
-82.97  
-83.04  
-85.02  
-85.03  
-85.11  
-85.12

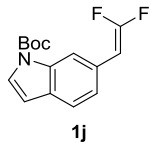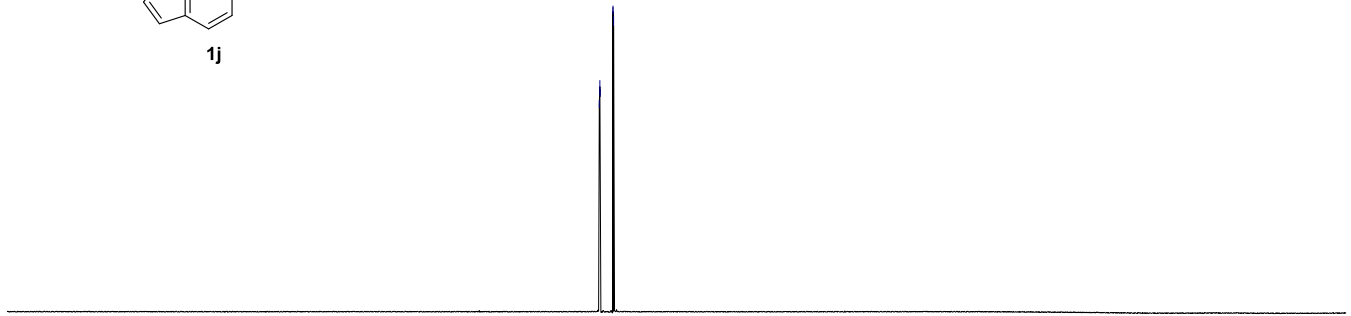

158.95  
149.71  
135.41  
129.56  
126.50  
126.30  
122.55  
122.49  
120.99  
114.35  
114.23  
107.11  
83.92  
83.11  
82.97  
82.81  
82.69

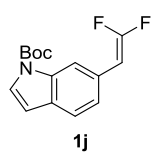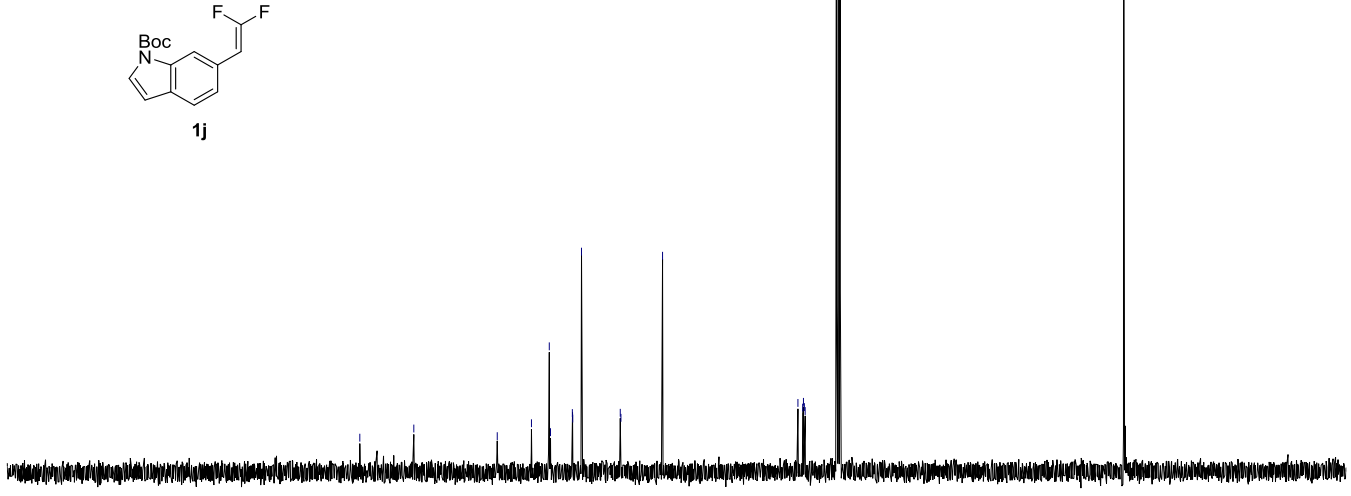

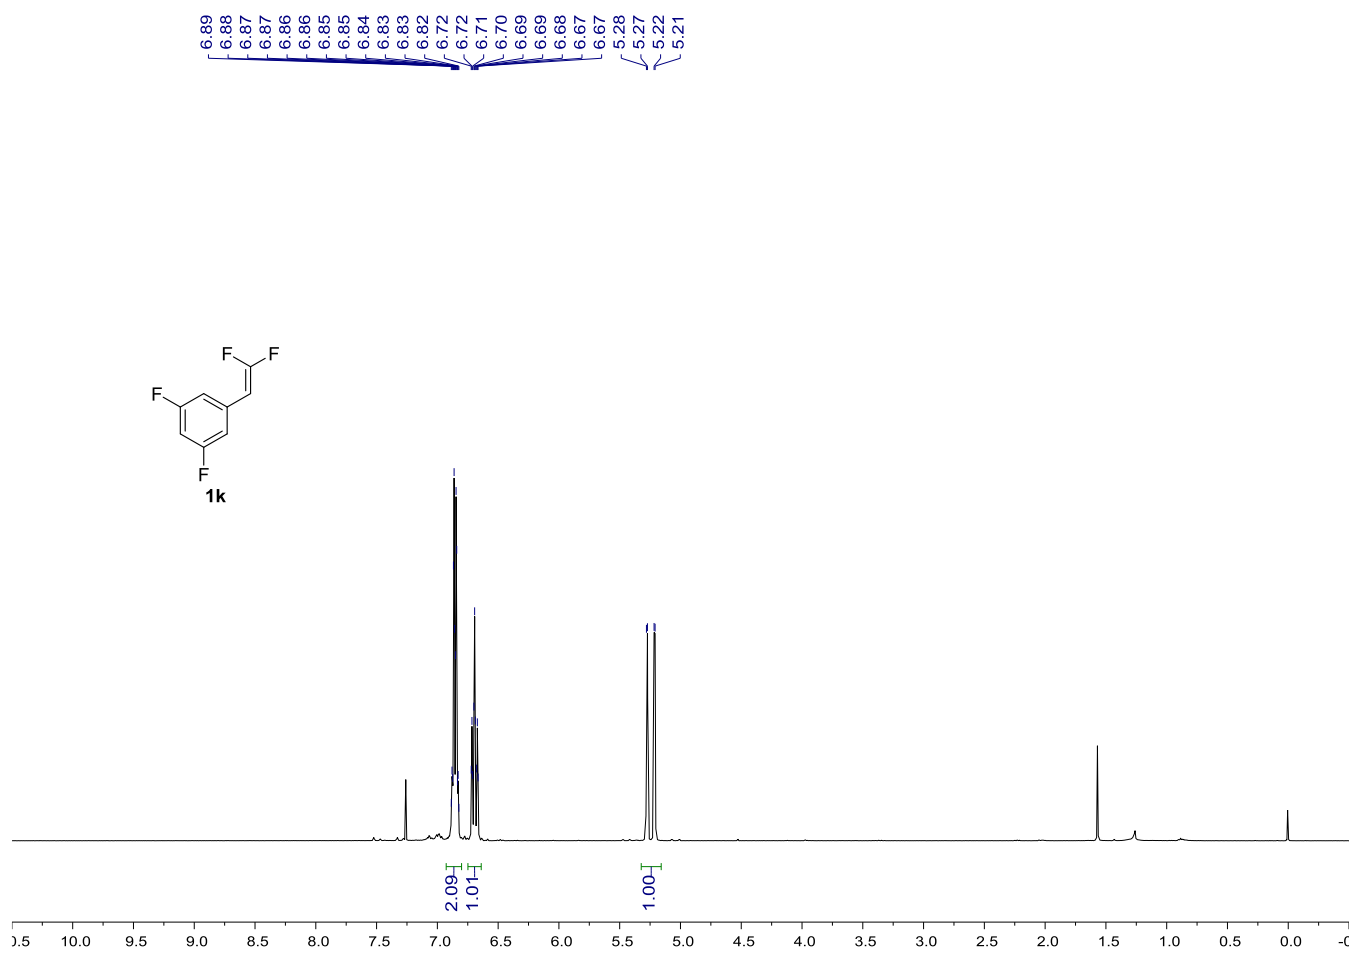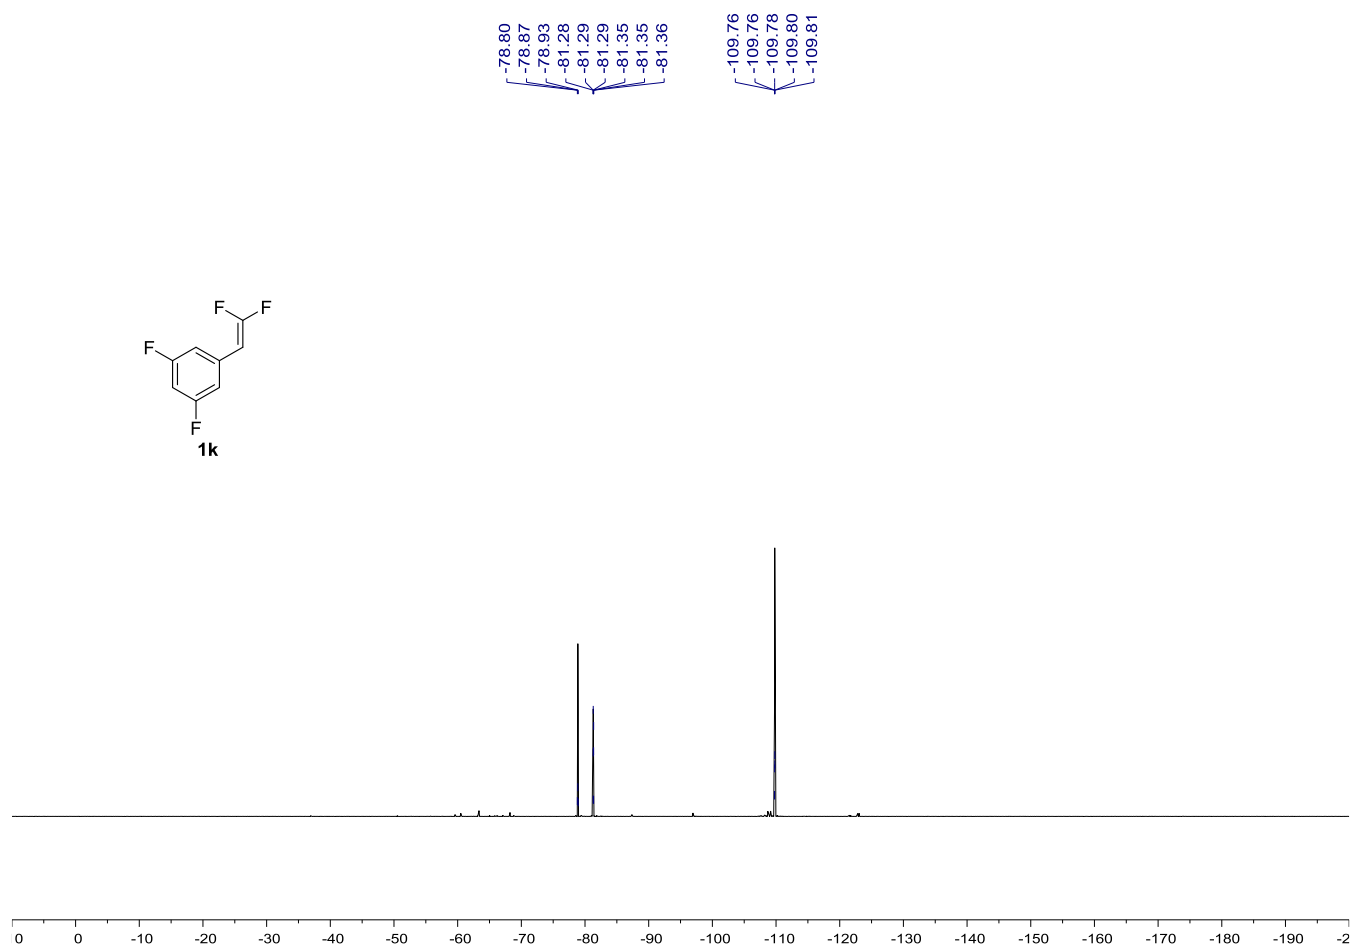

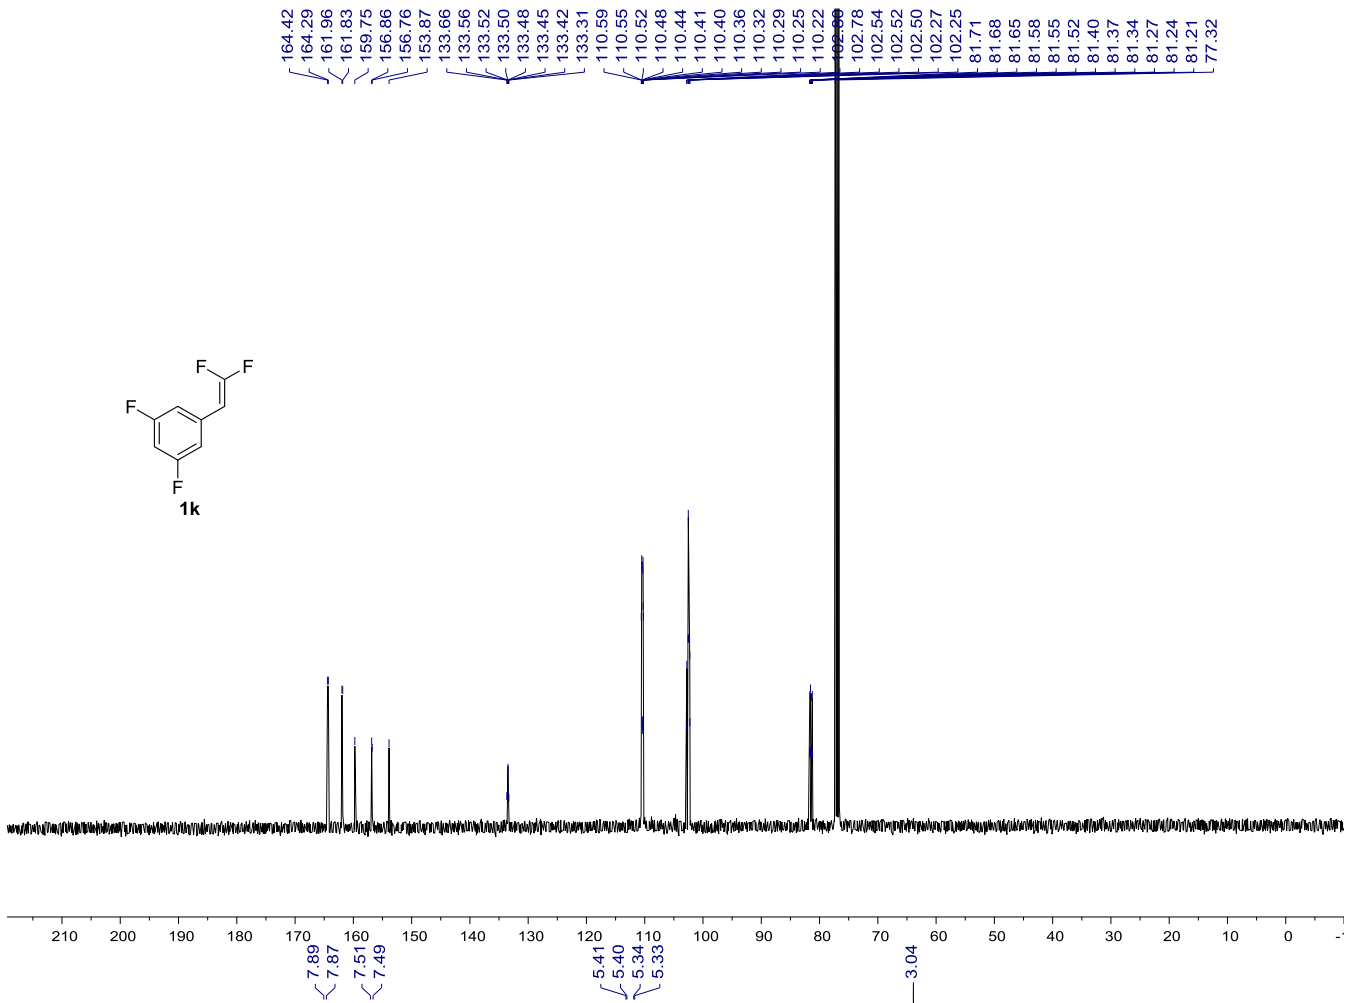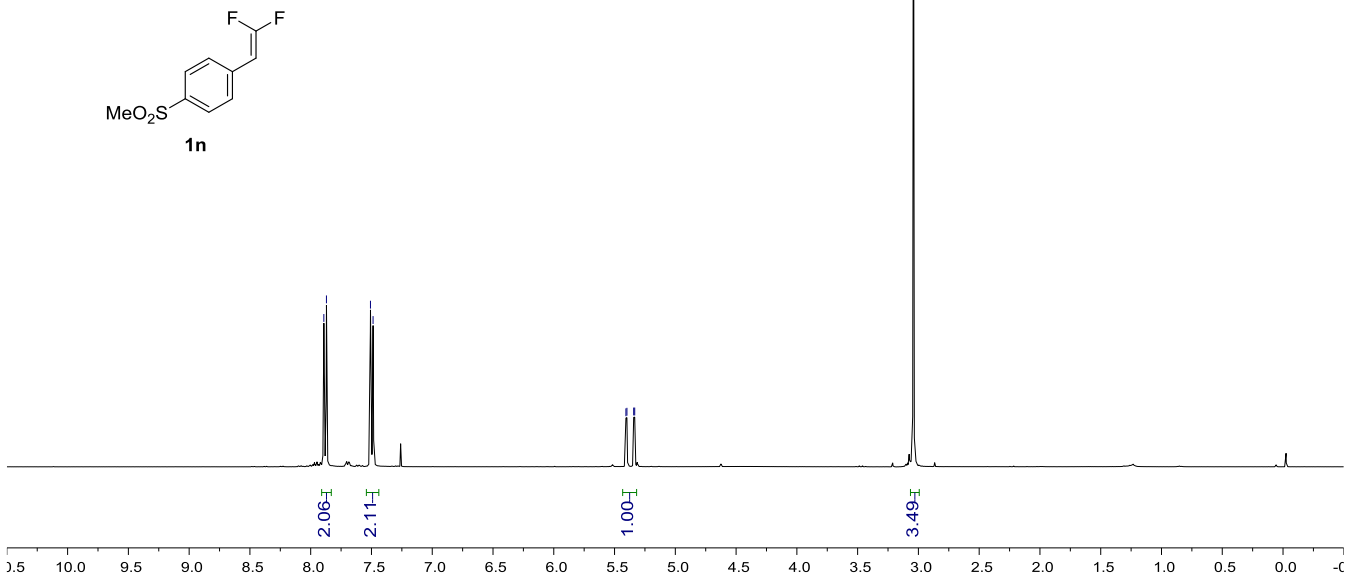

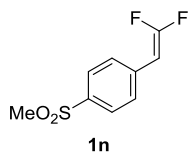

-77.83  
-77.89  
-77.90  
-77.95  
-79.42  
-79.43  
-79.47  
-79.48

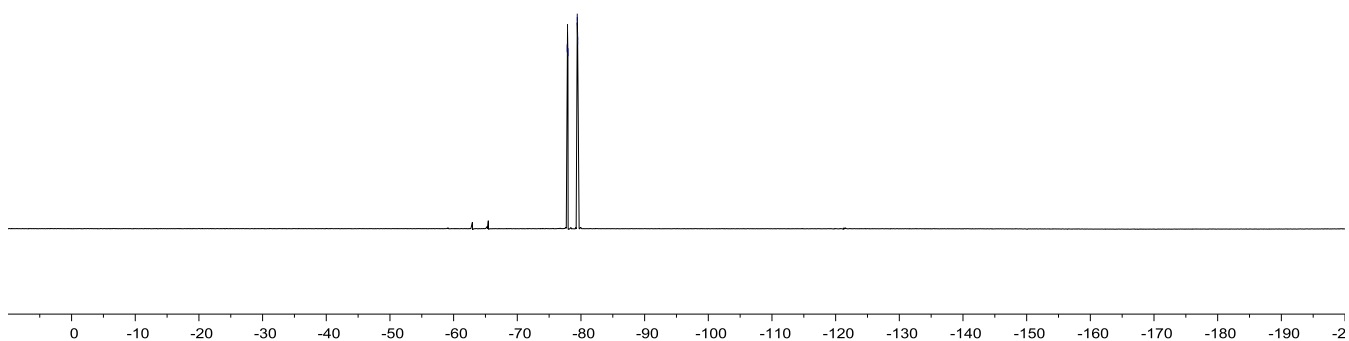

159.93  
157.03  
156.94  
154.03  
138.59  
138.57  
138.55  
136.31  
136.25  
136.24  
136.17  
128.23  
128.19  
128.16  
128.13  
127.73

81.78  
81.65  
81.47  
81.35

-44.42

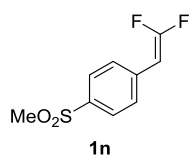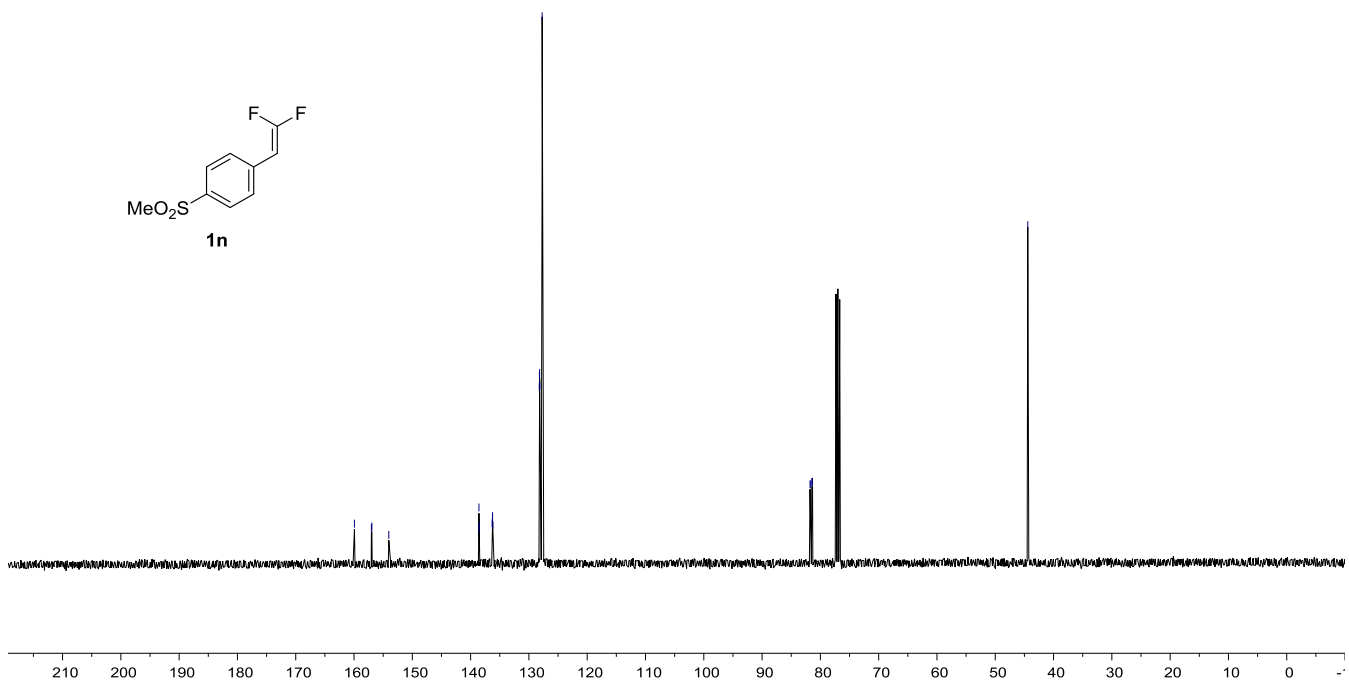

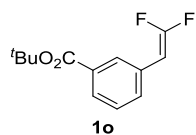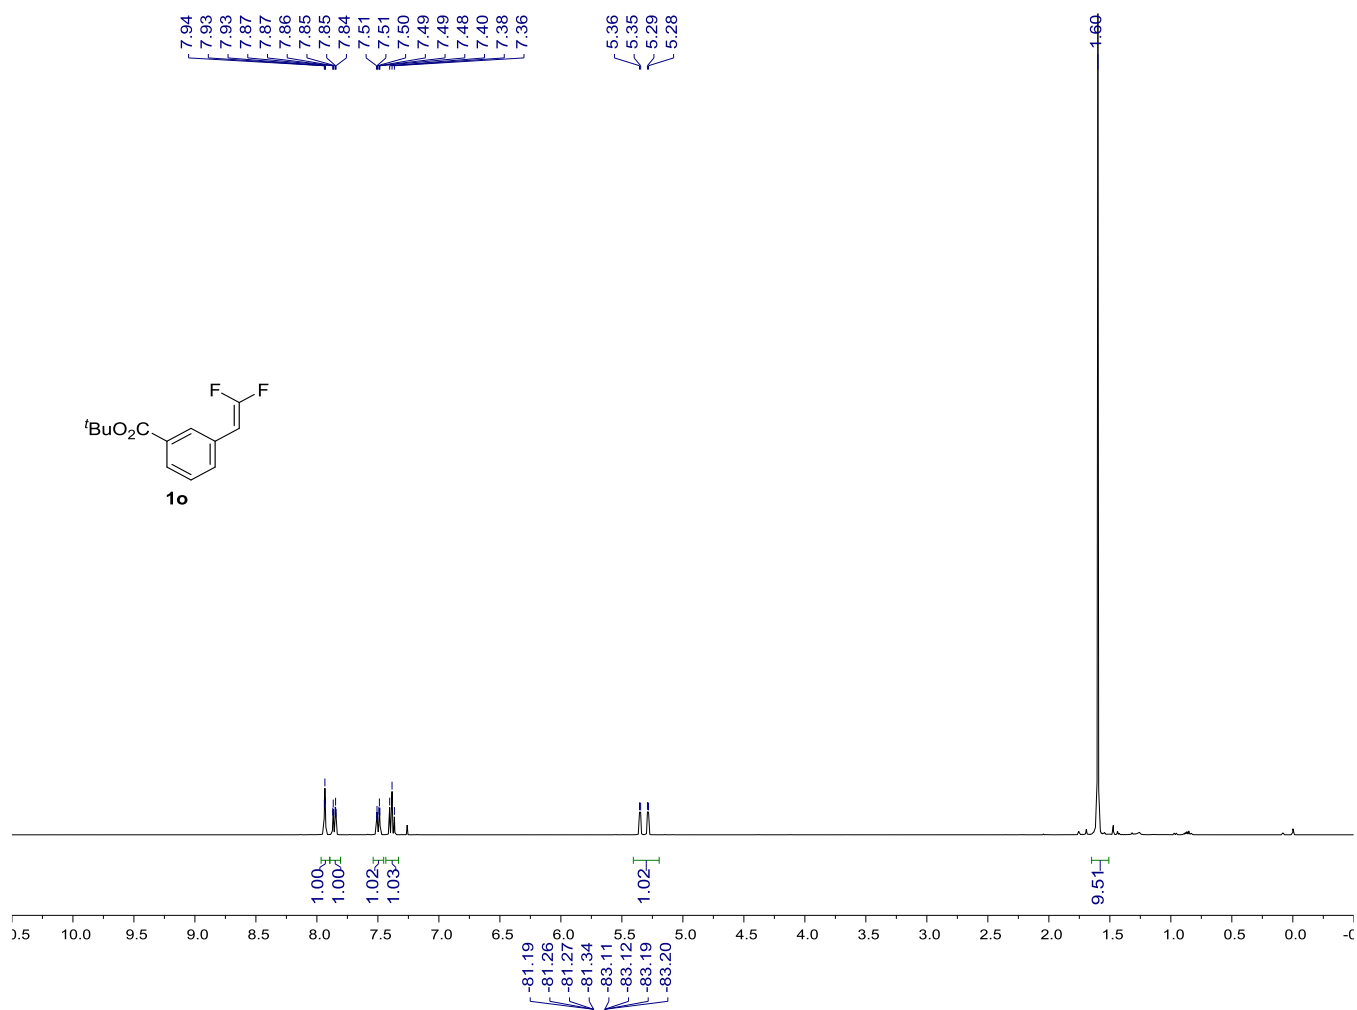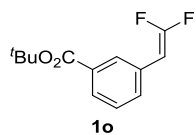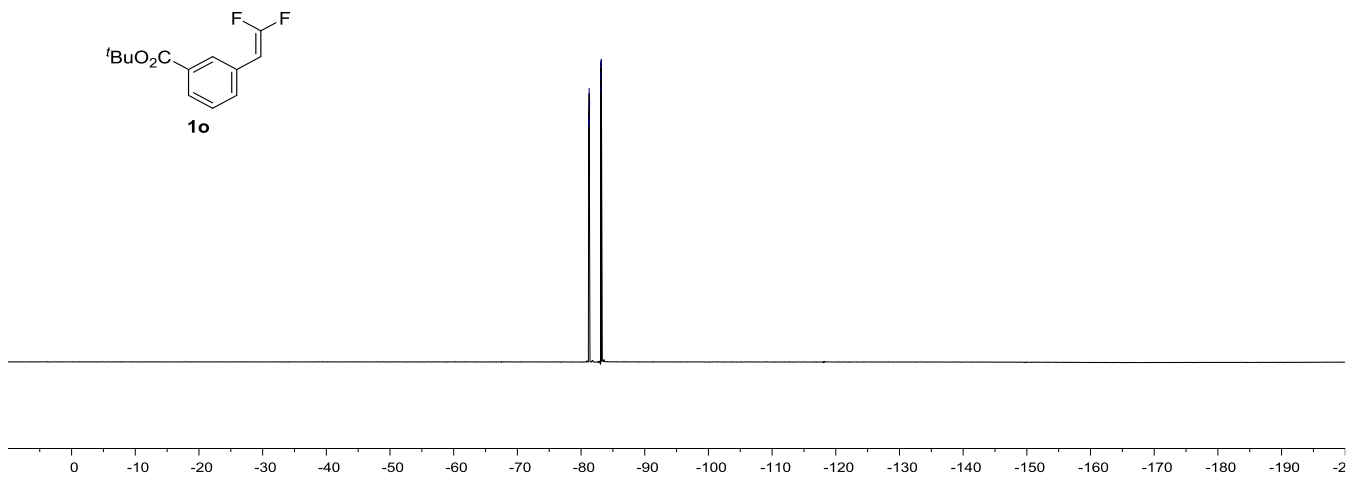

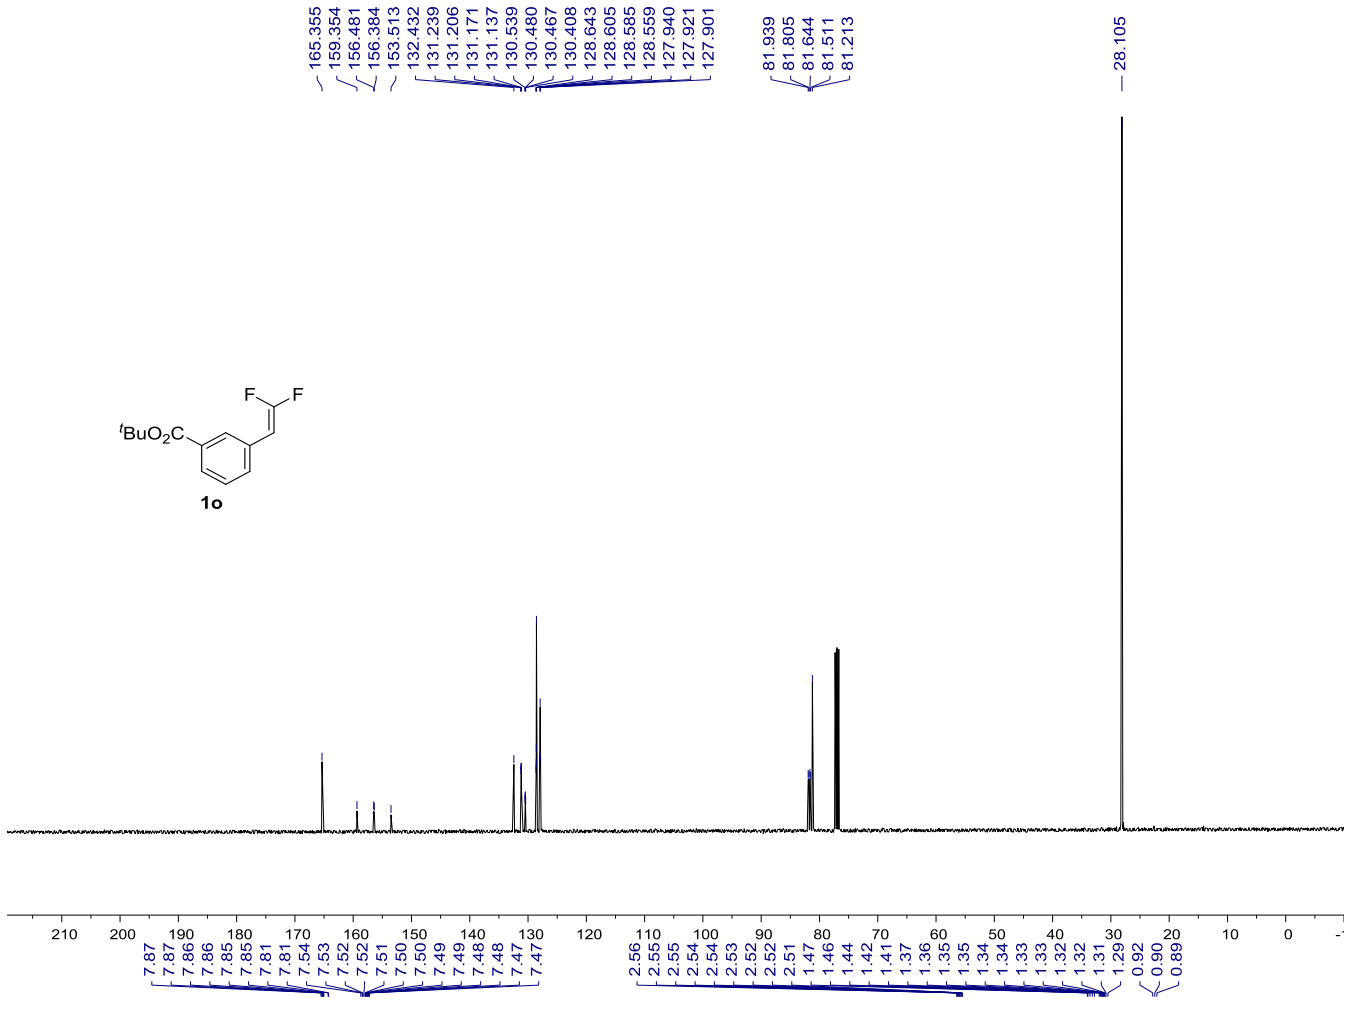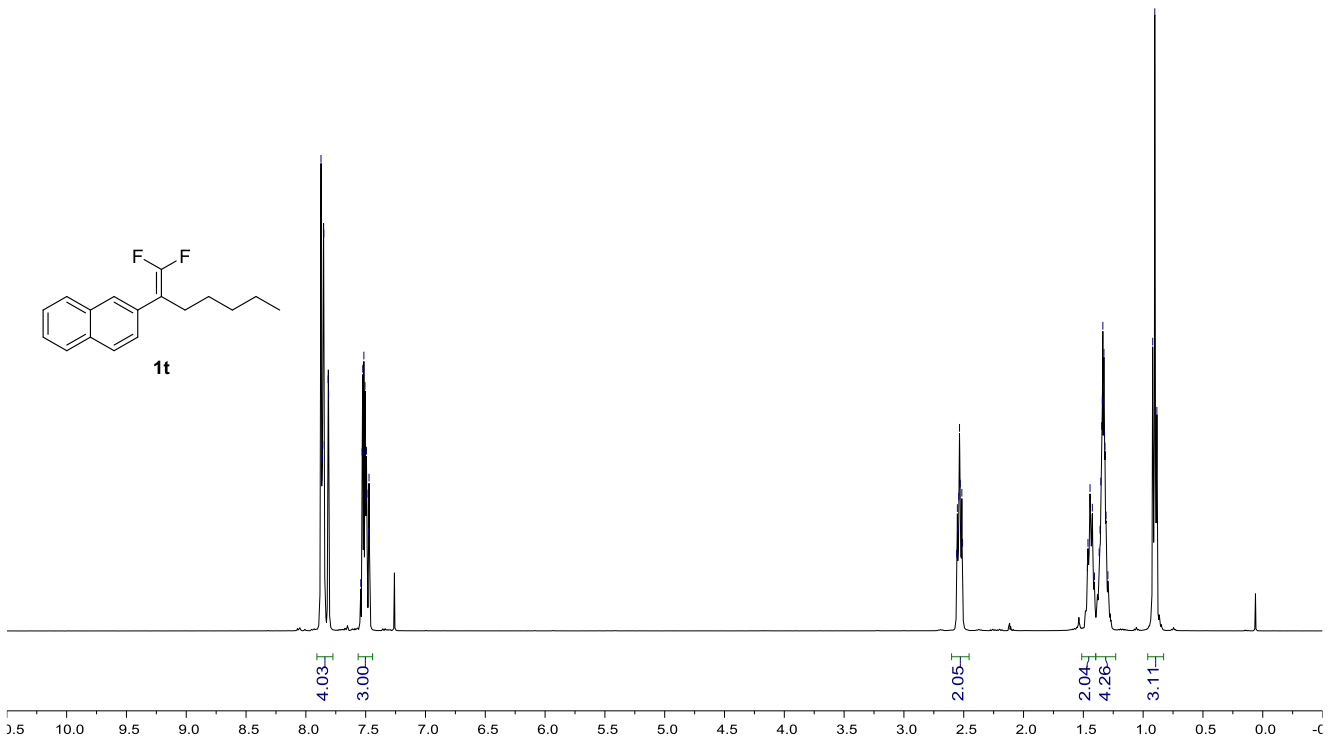

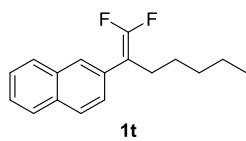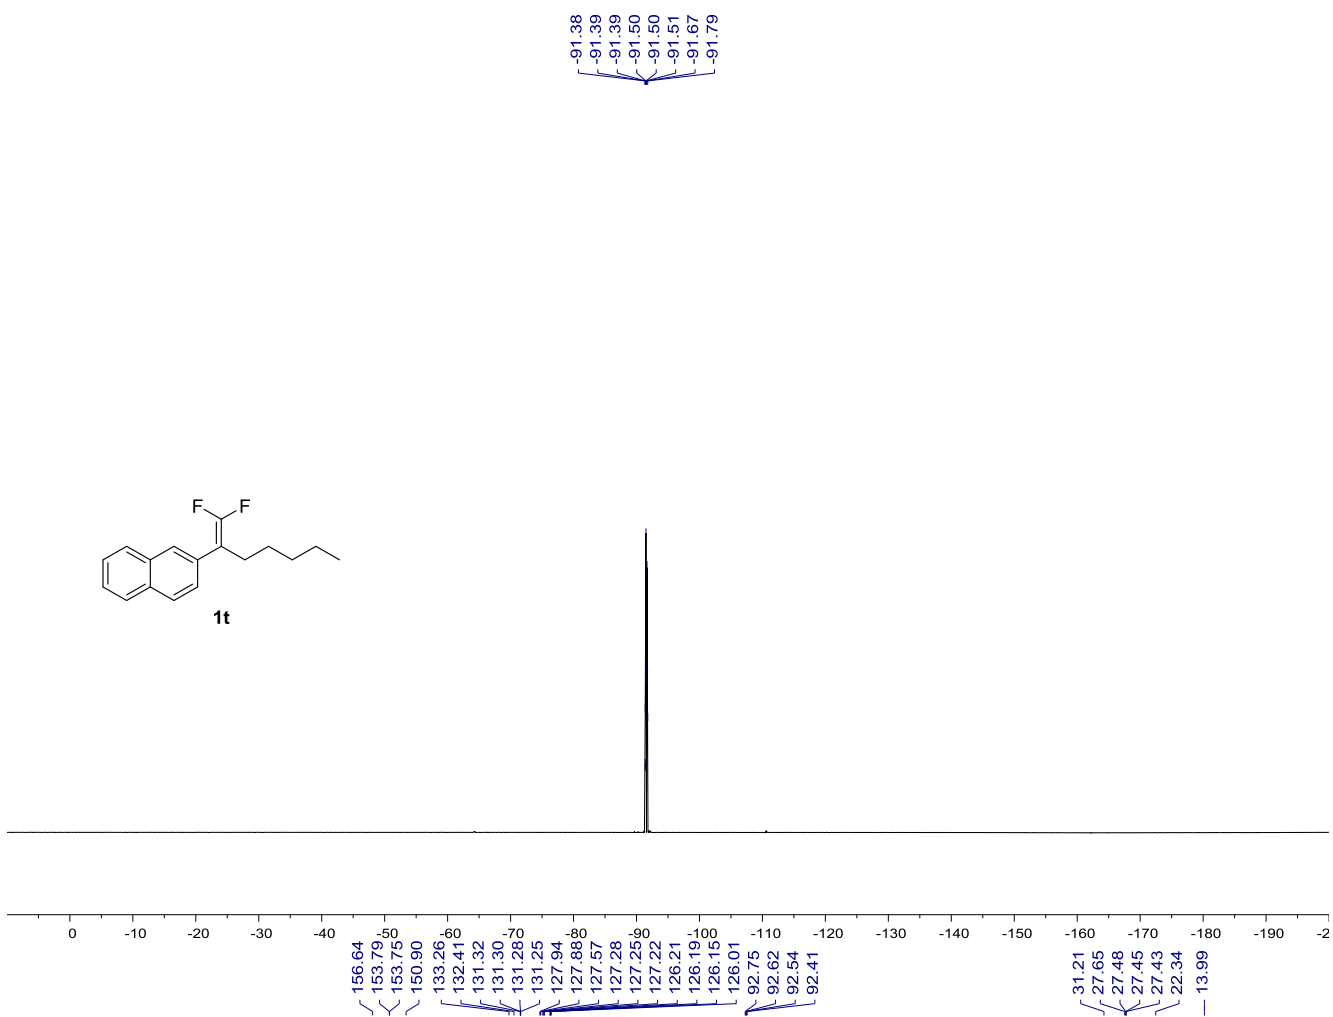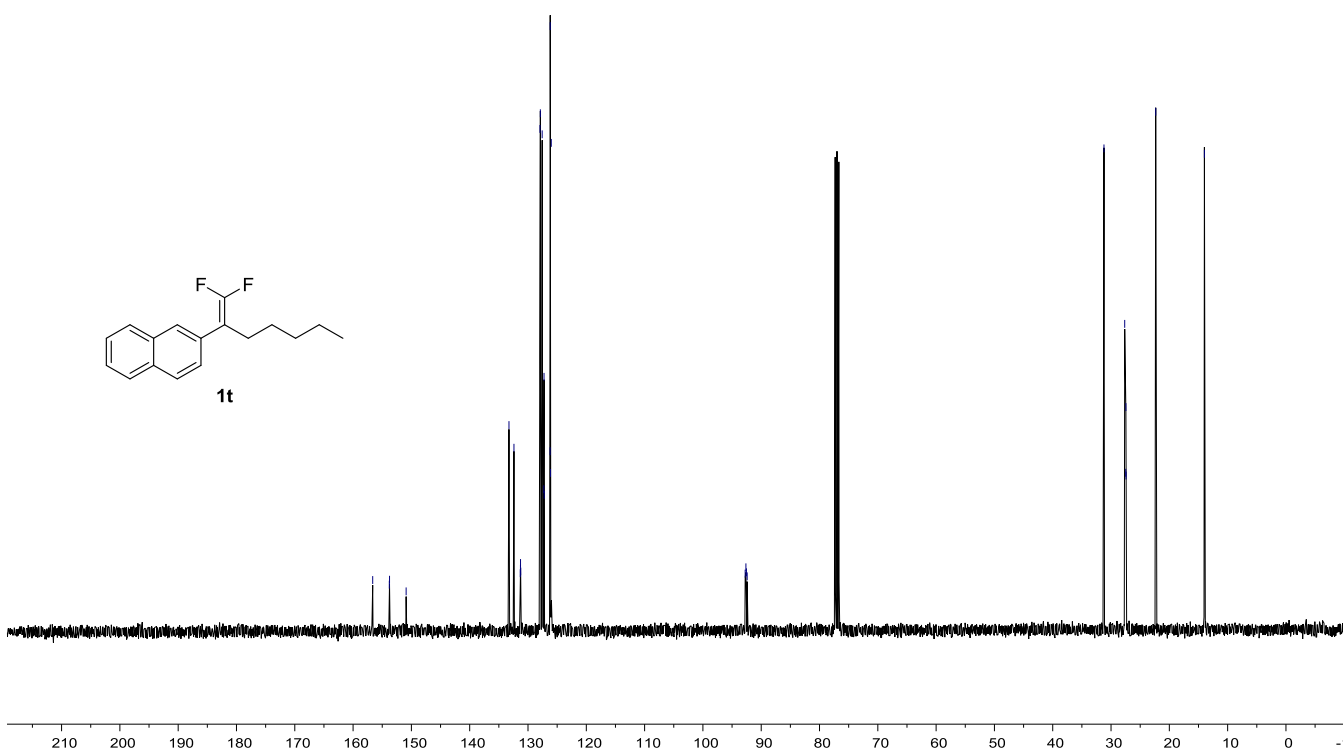

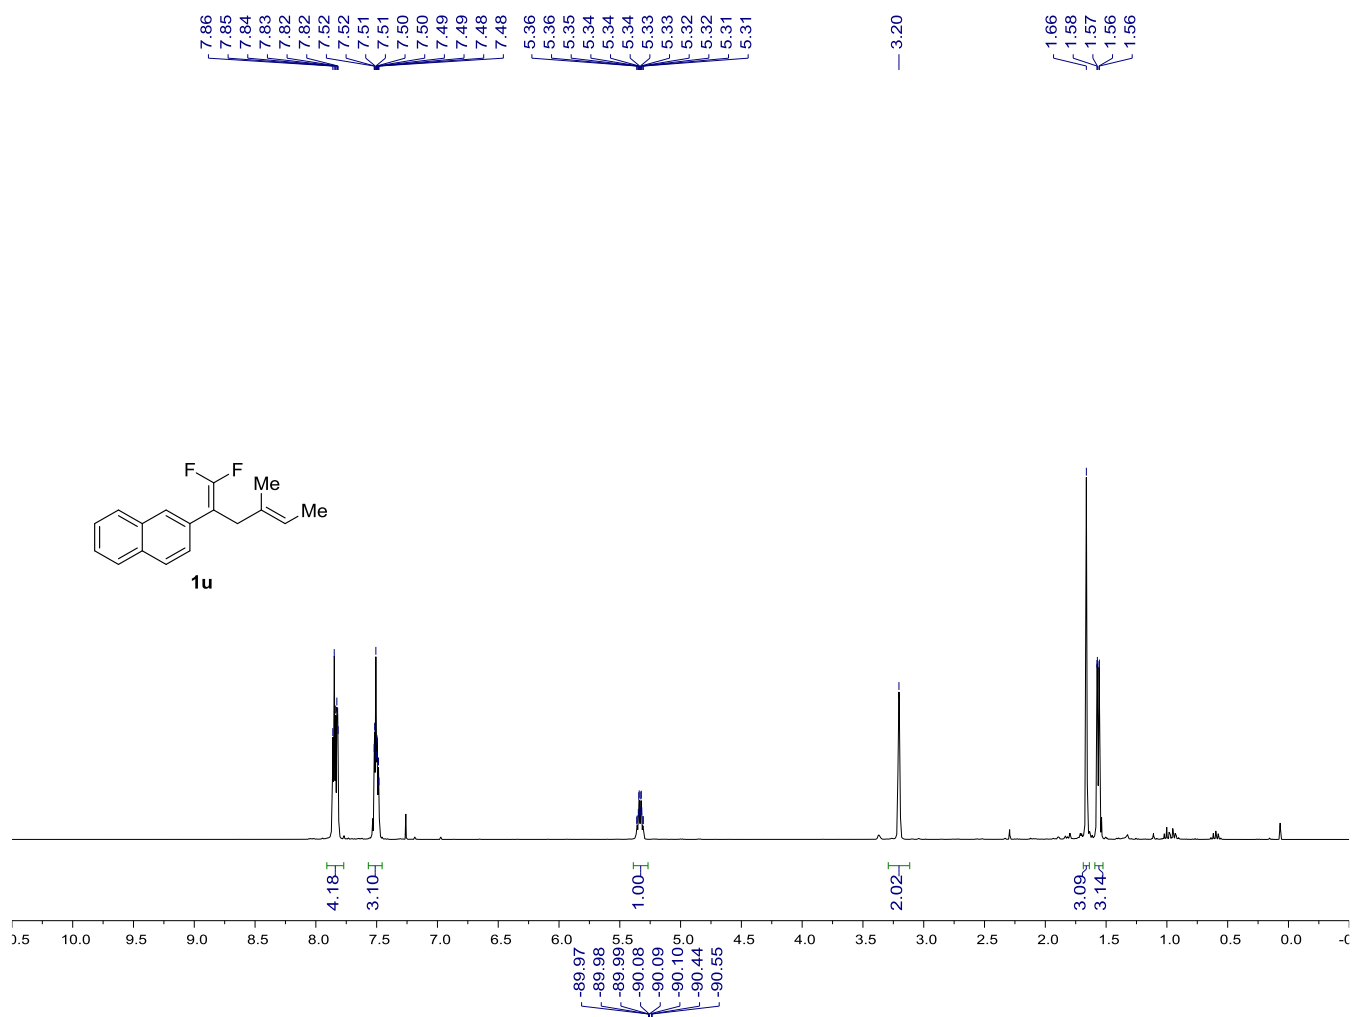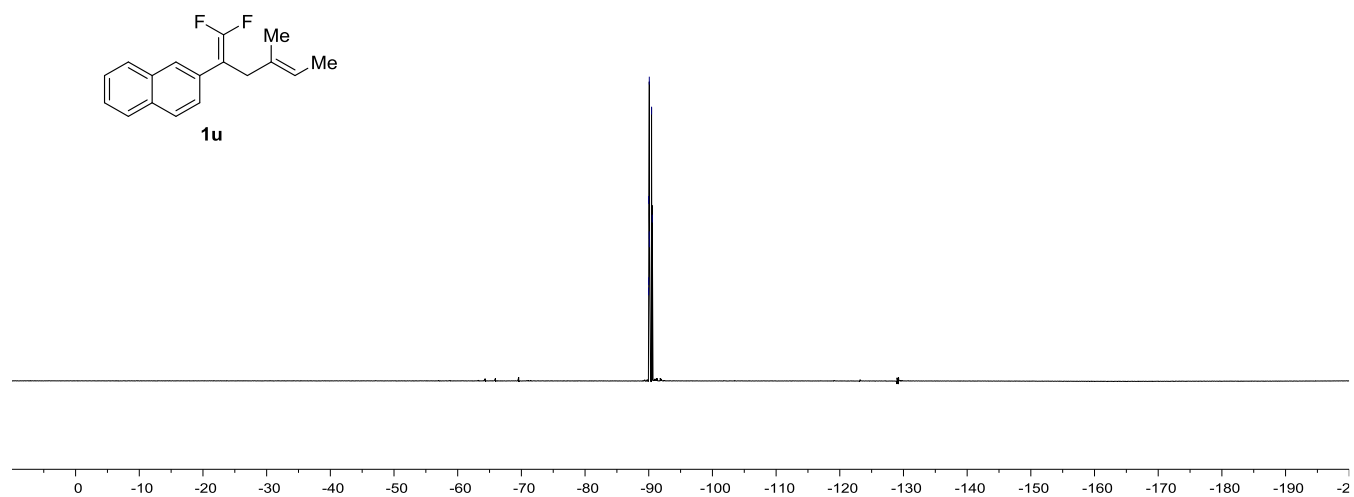



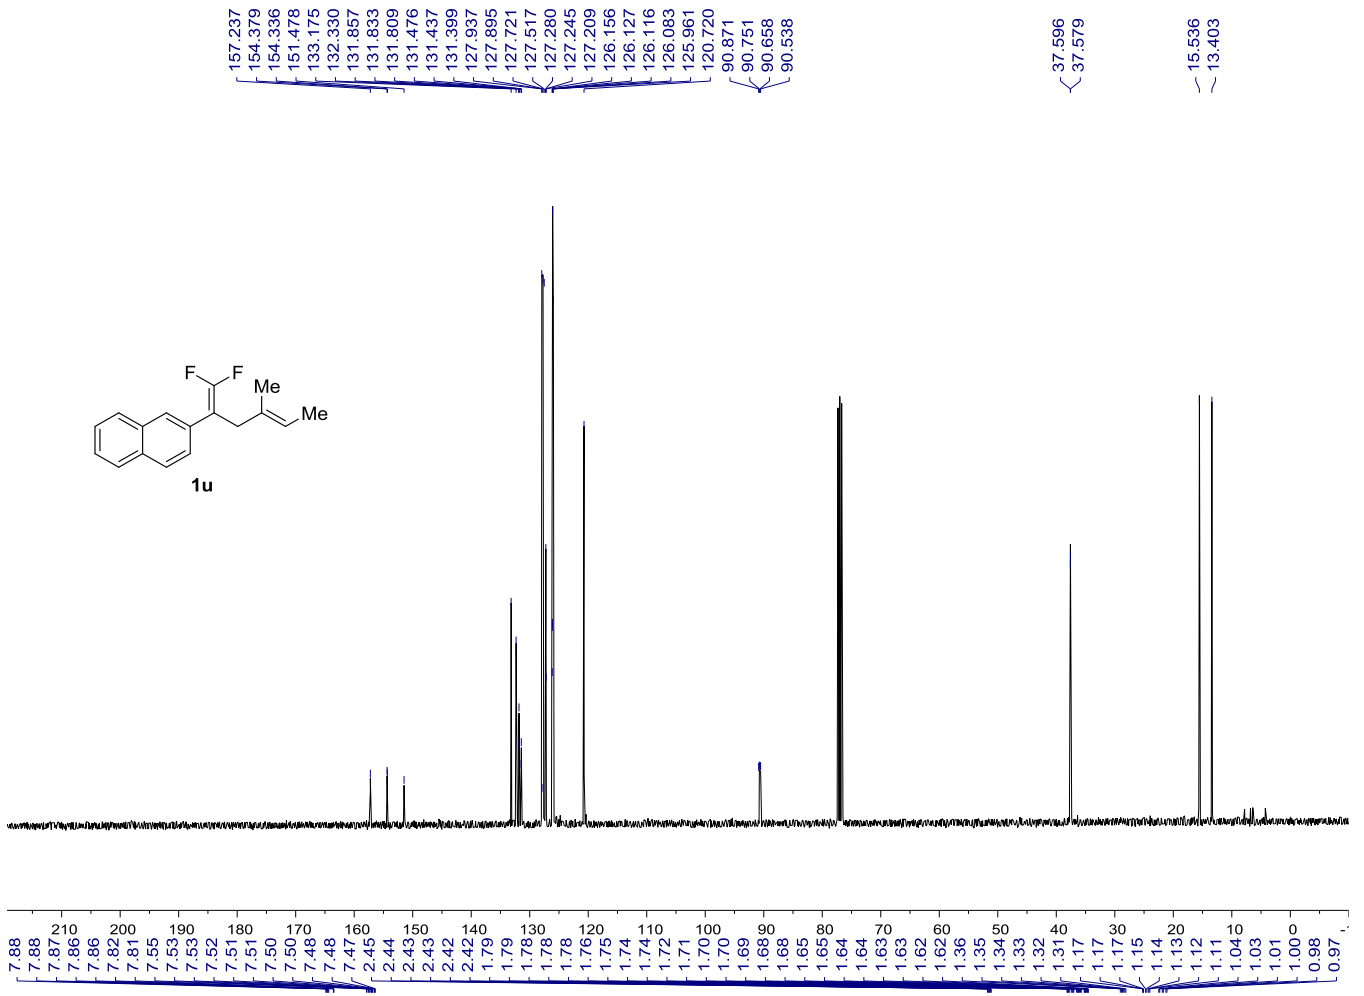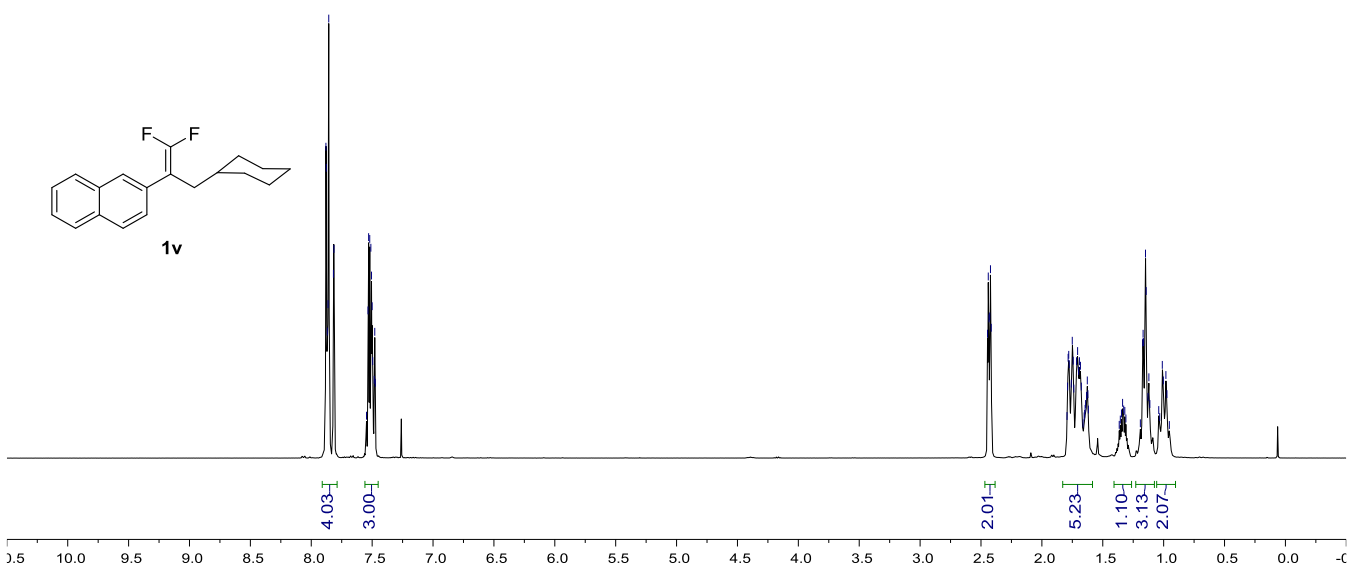

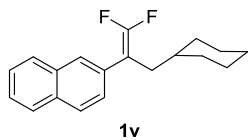

-90.75  
 -90.76  
 -90.77  
 -90.87  
 -90.88  
 -91.46  
 -91.47  
 -91.58

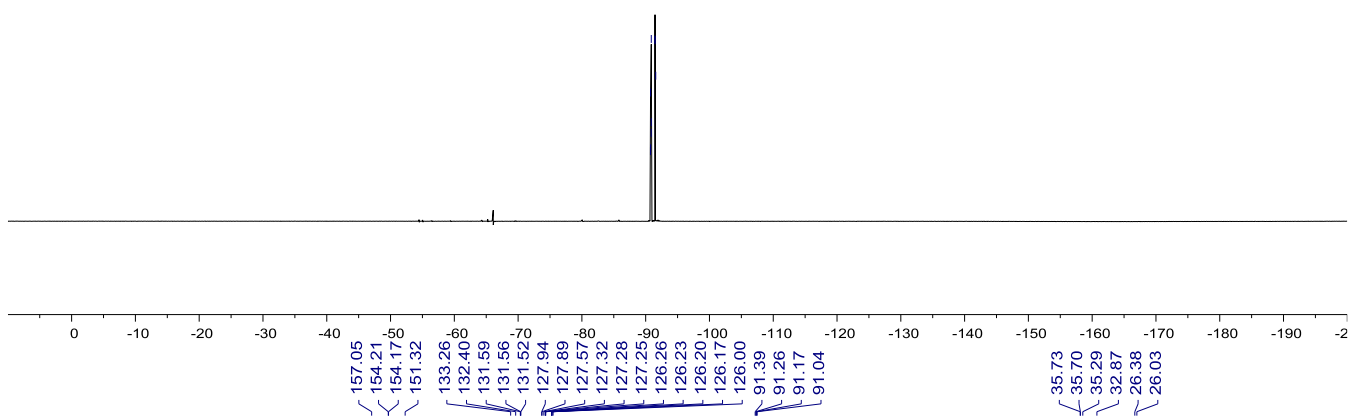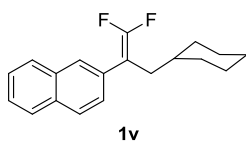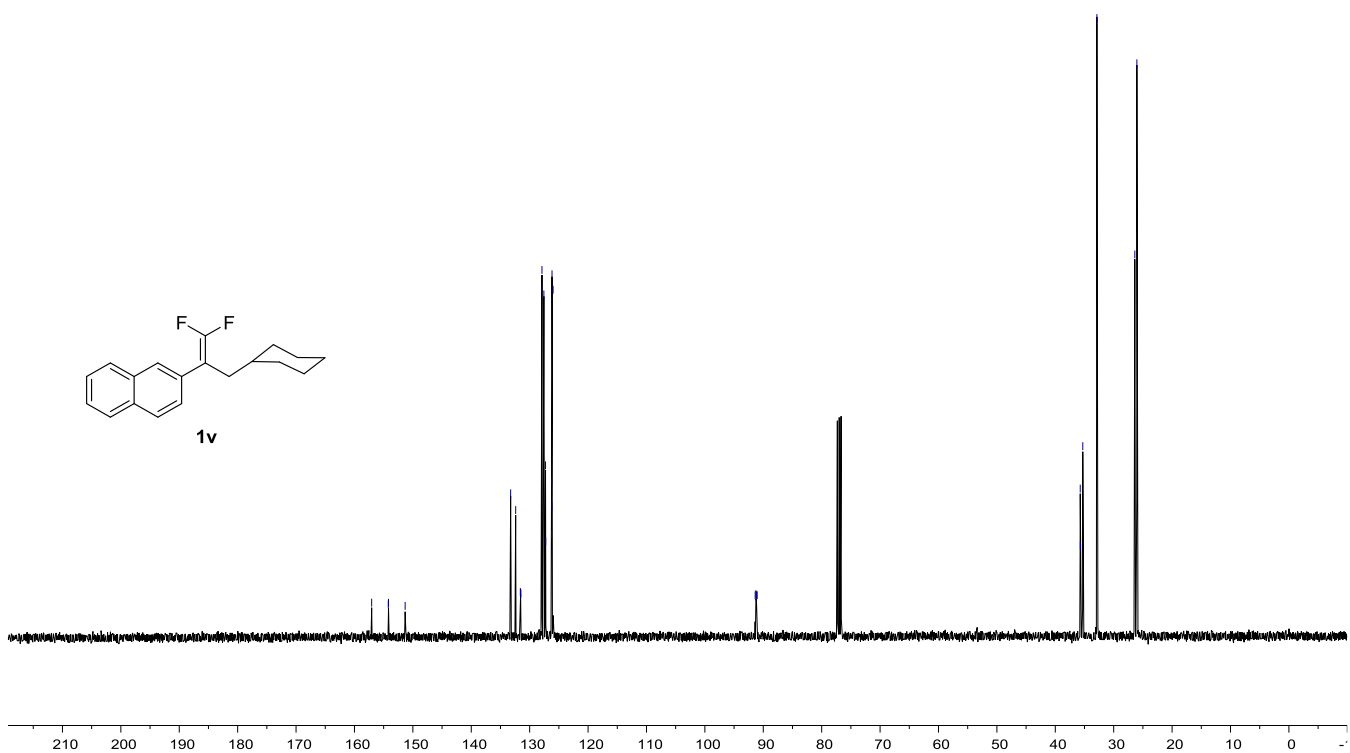

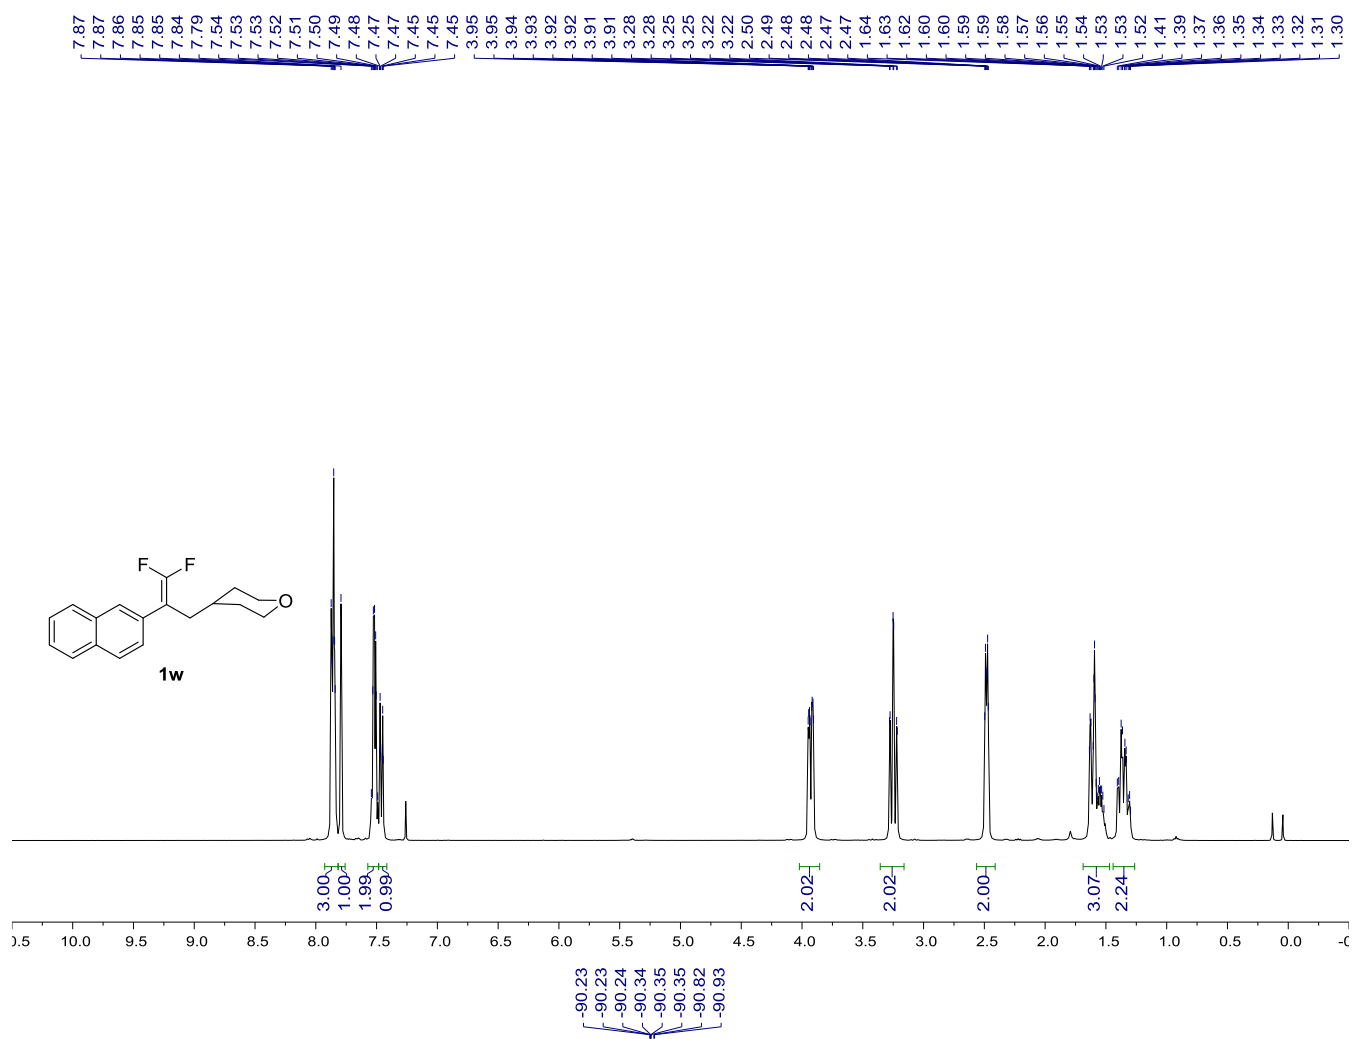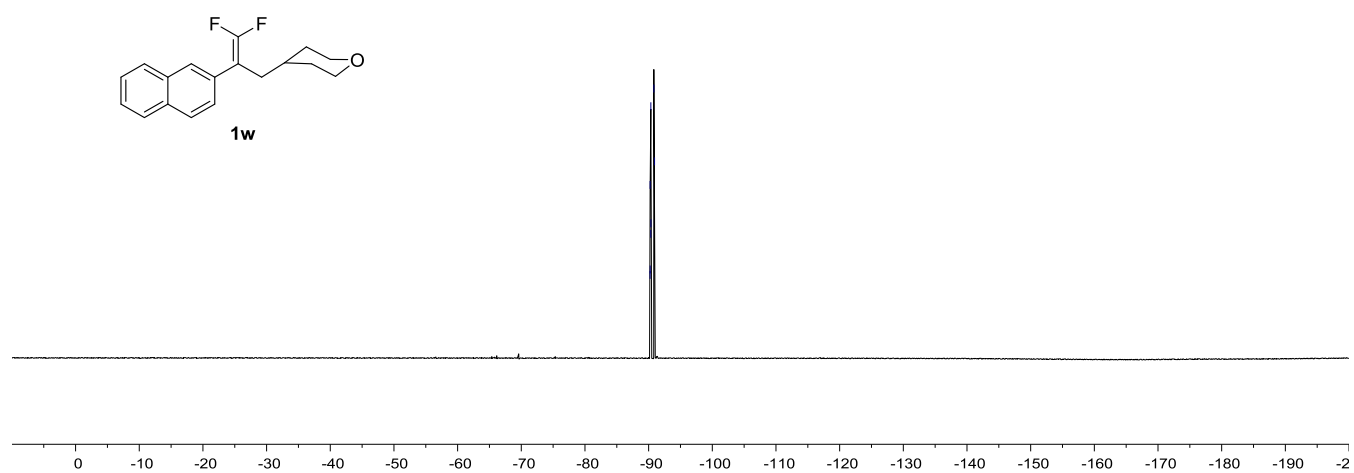

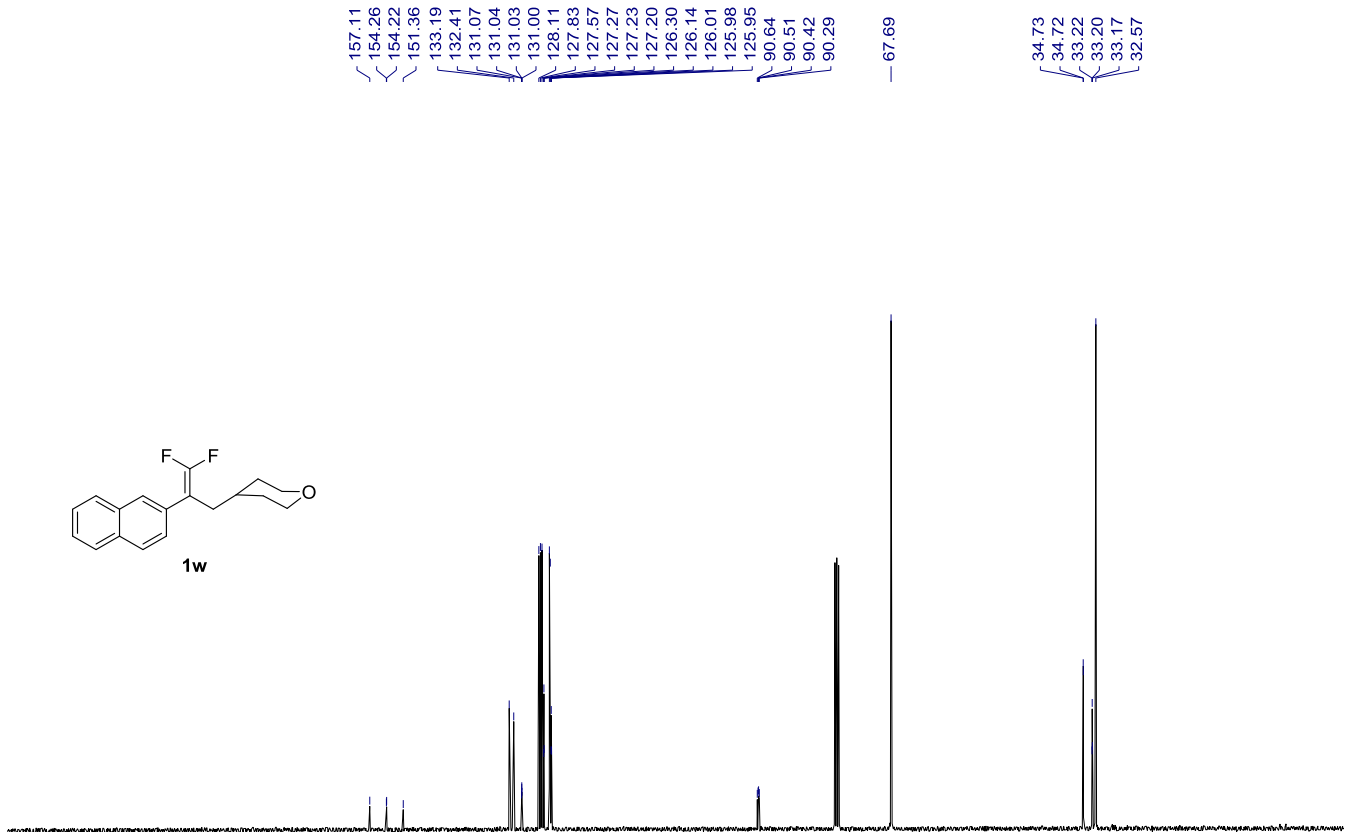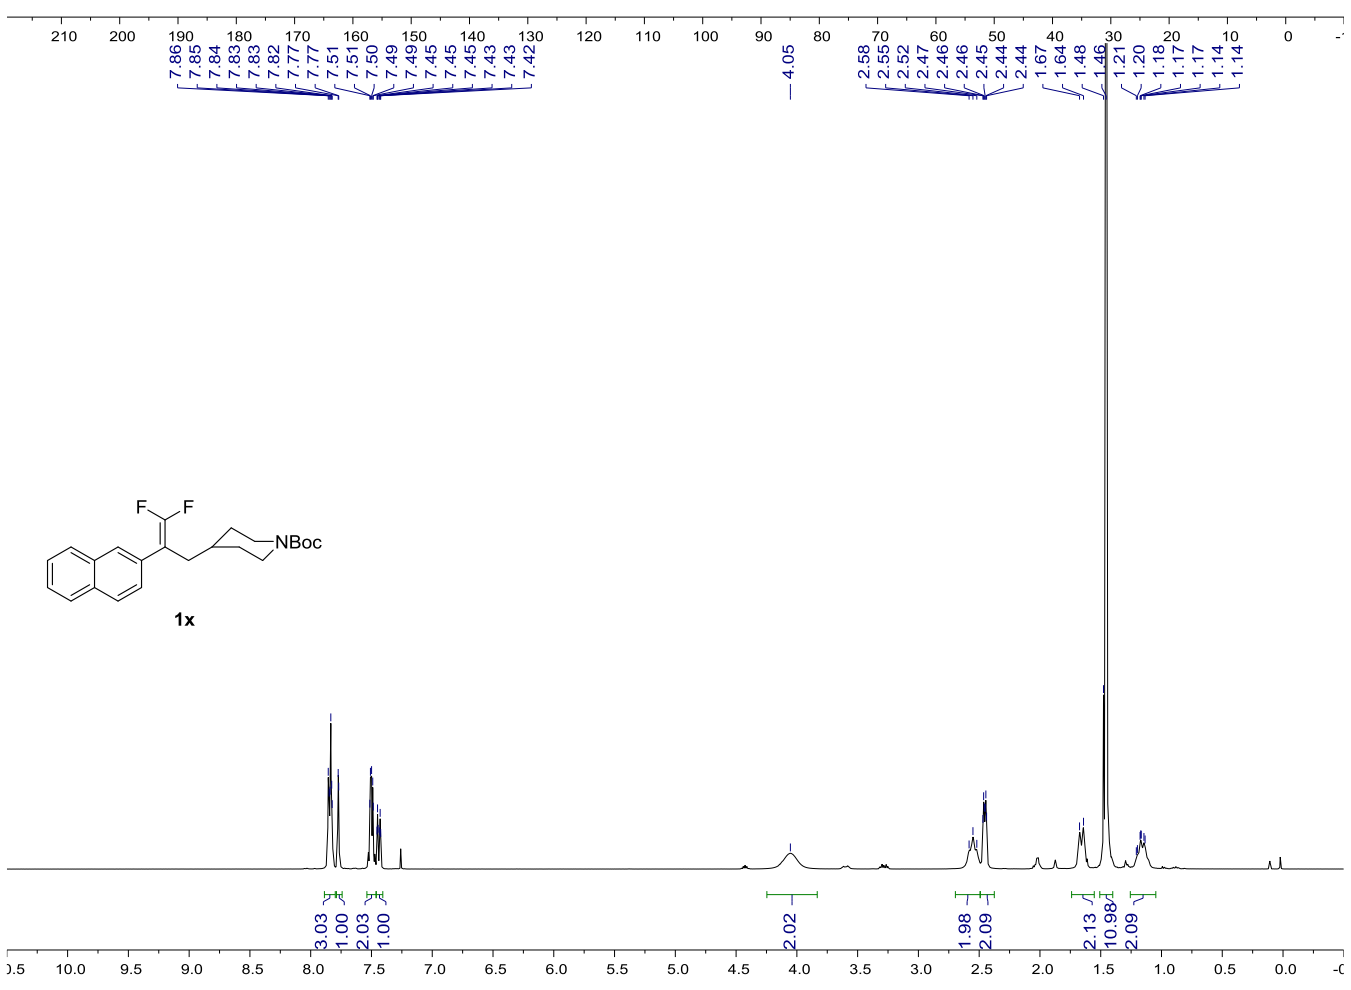

-90.16  
-90.16  
-90.17  
-90.27  
-90.27  
-90.28  
-90.79  
-90.90

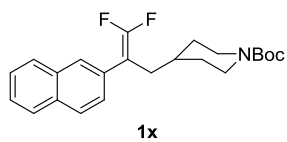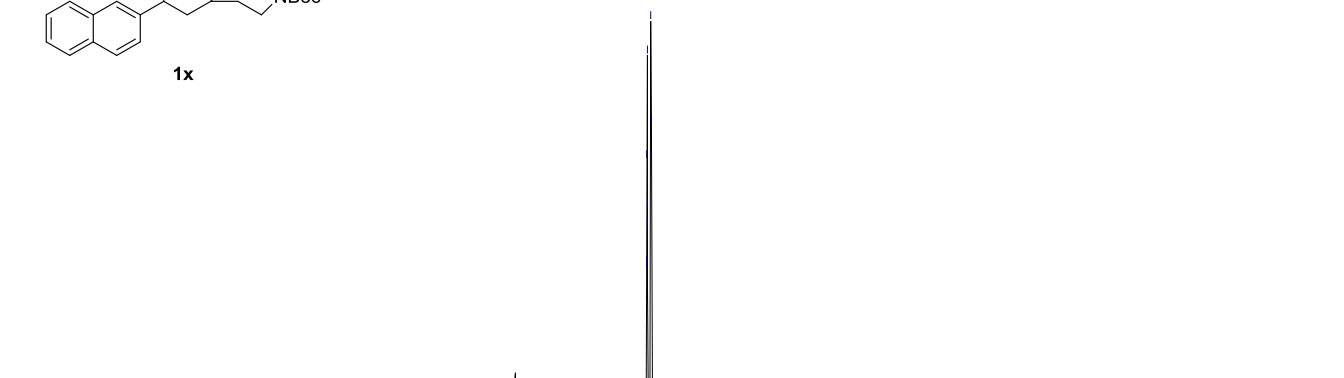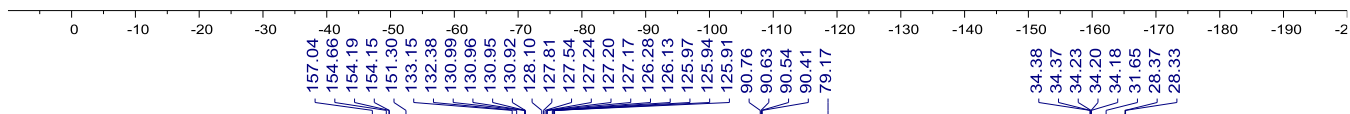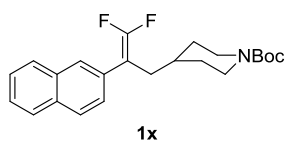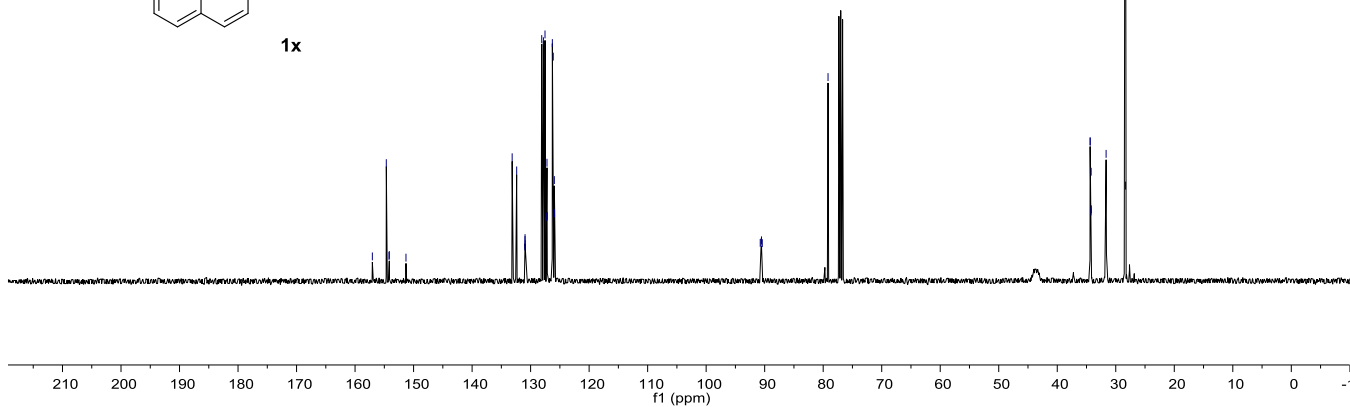

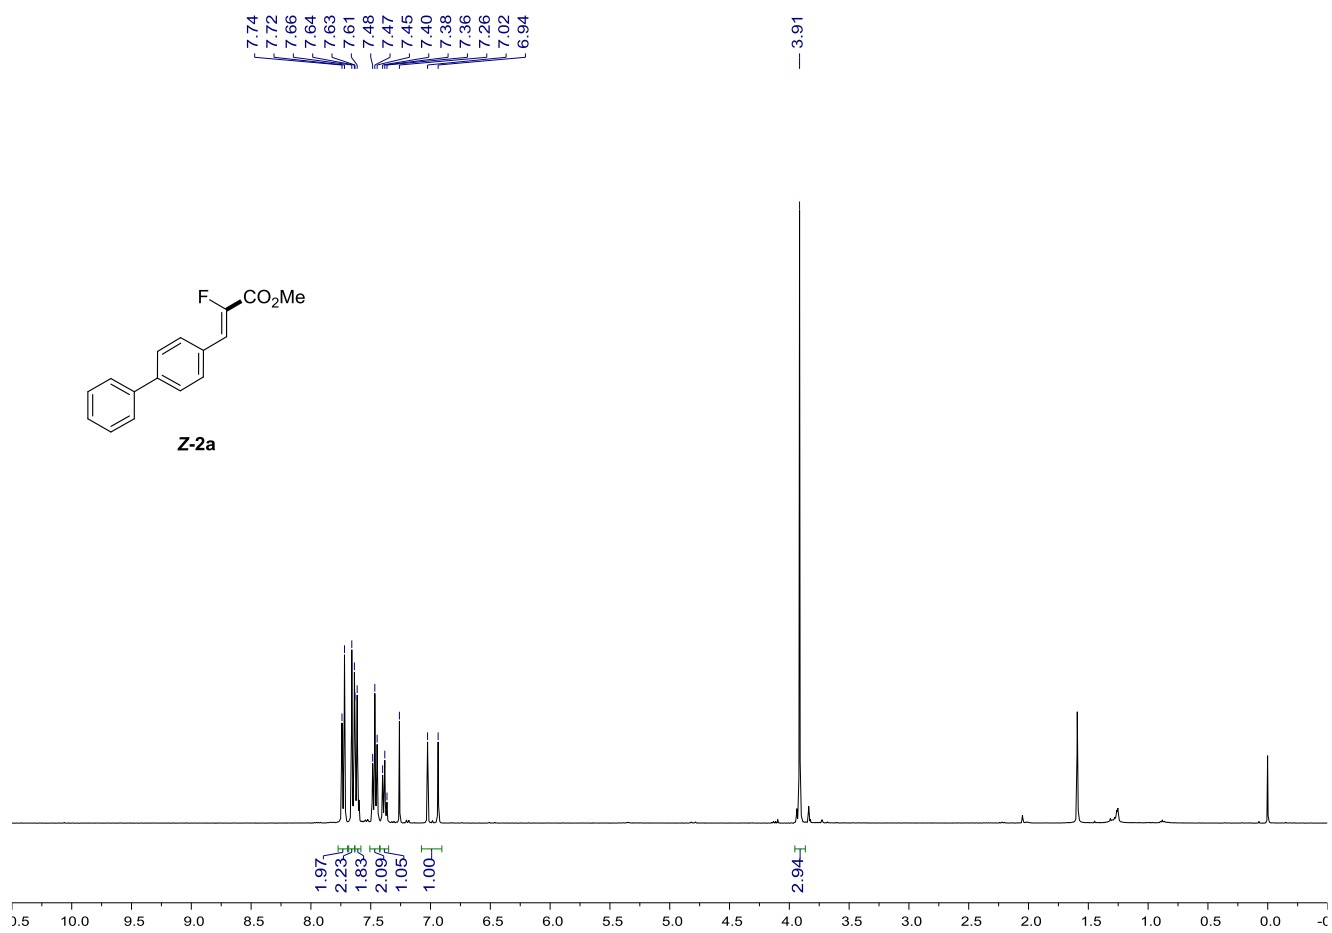

-125.46  
-125.56

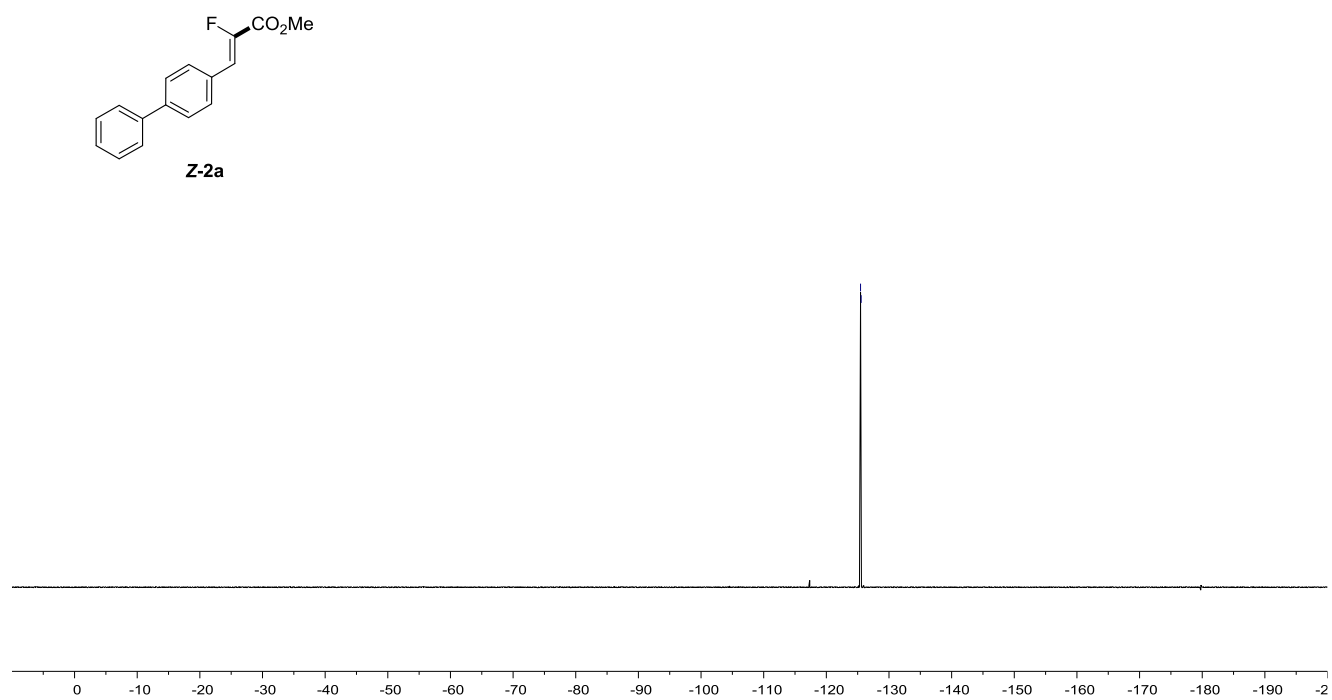

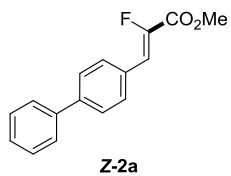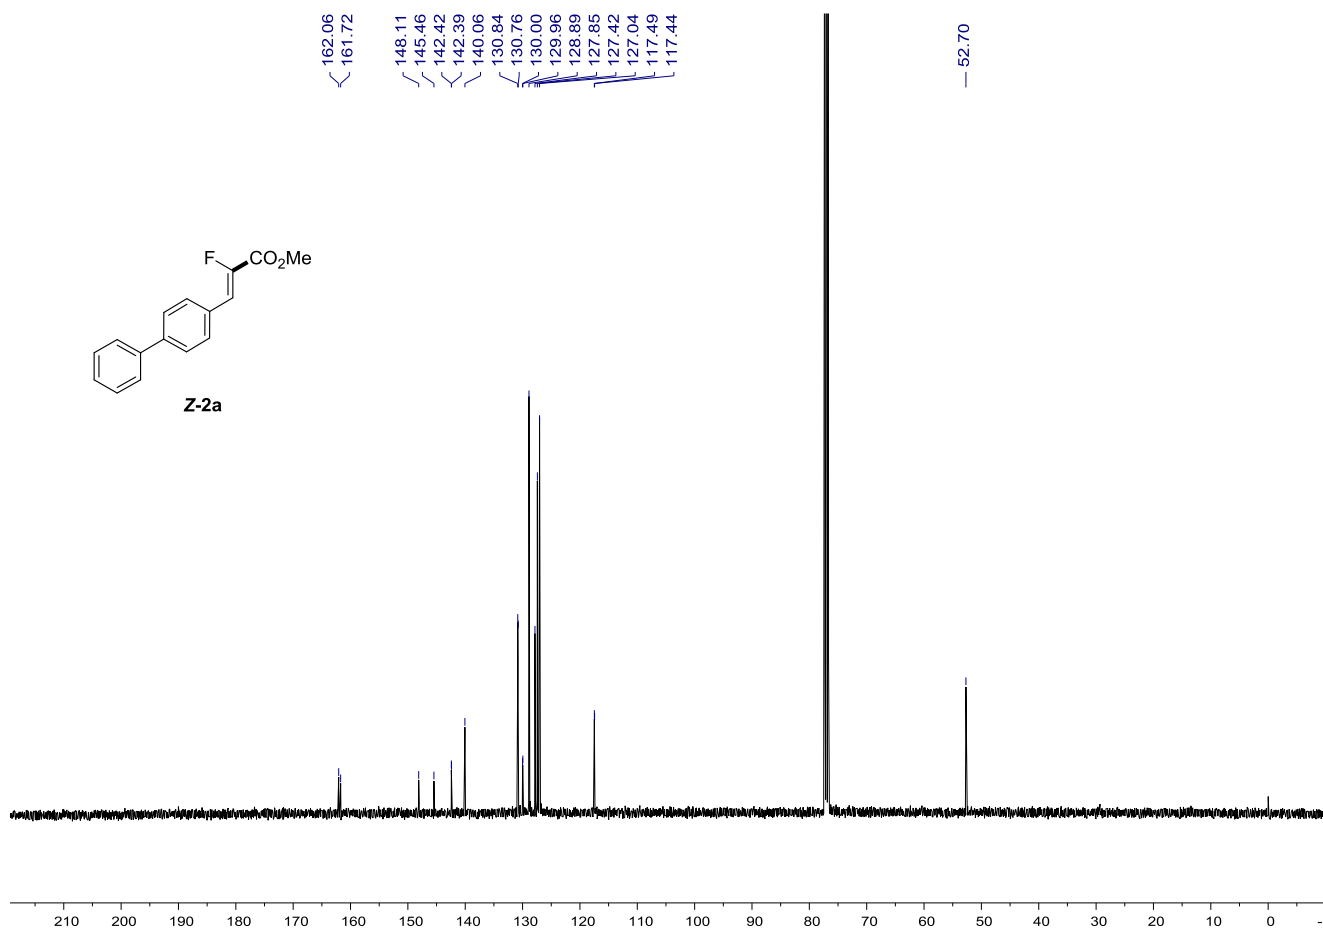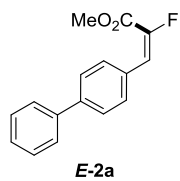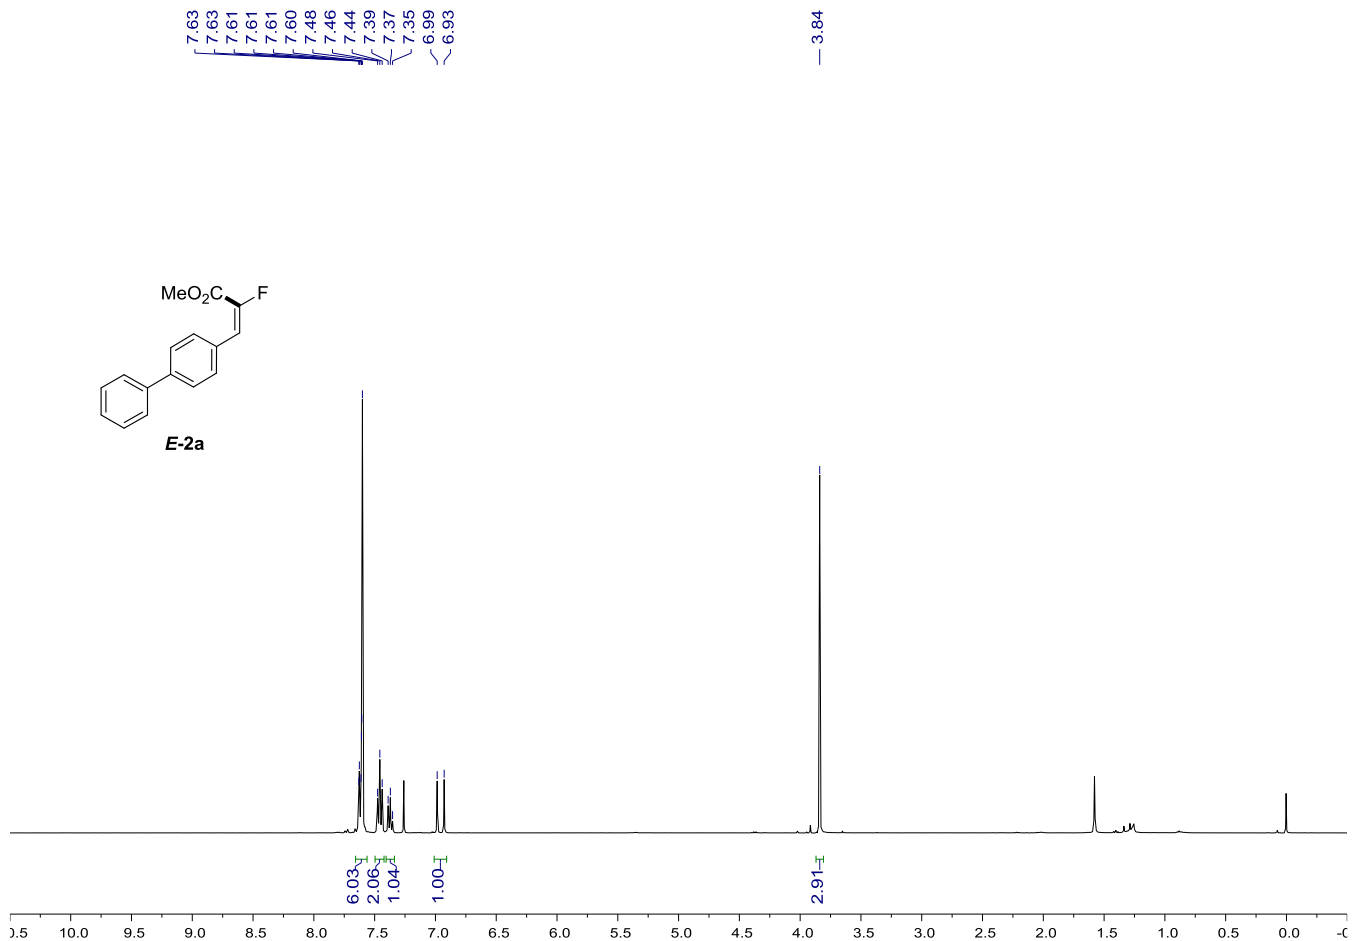

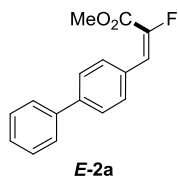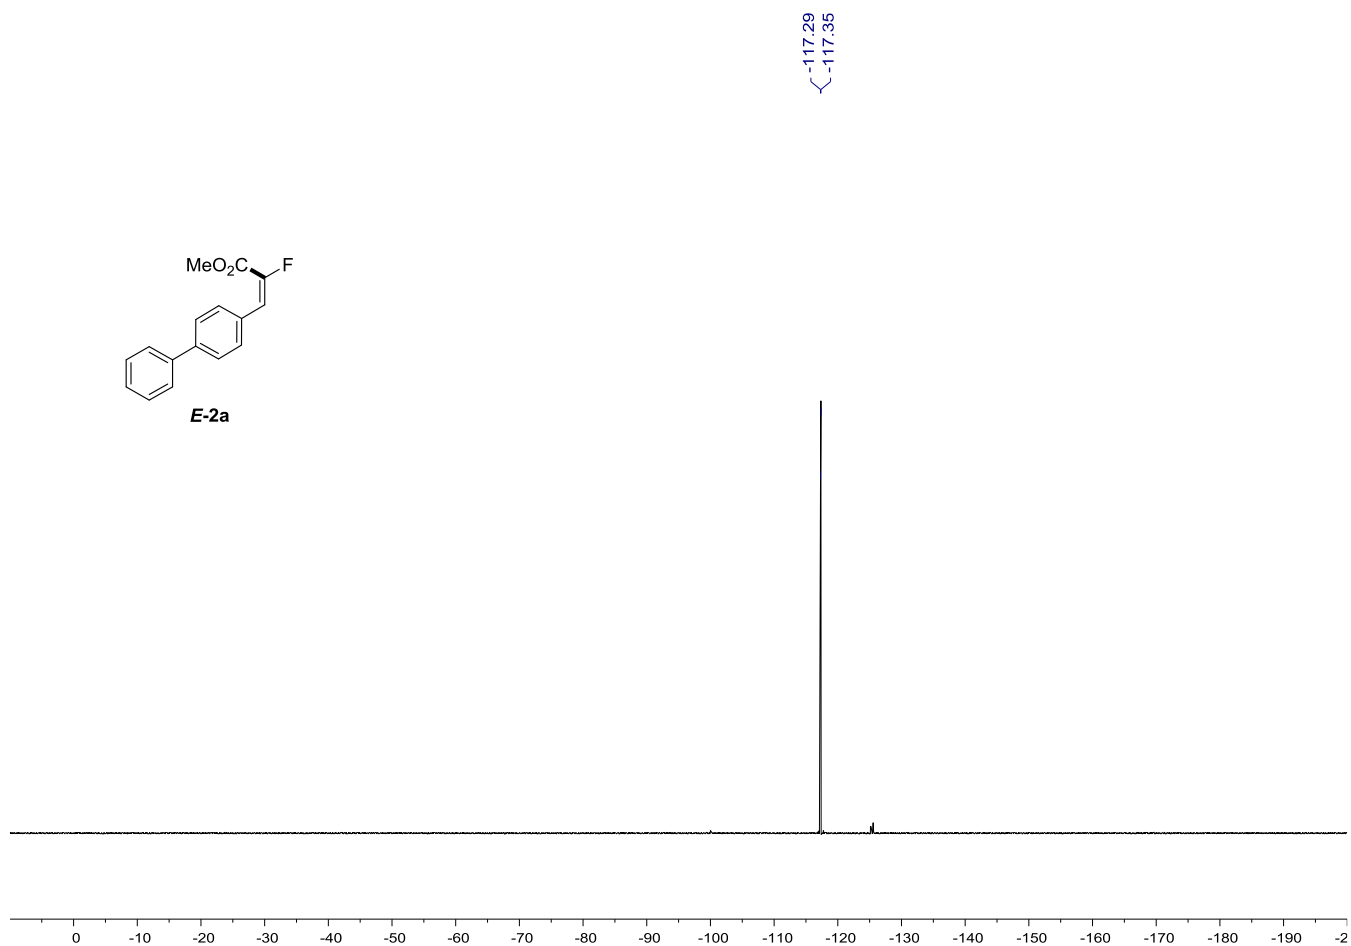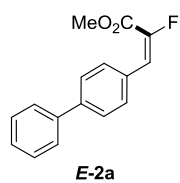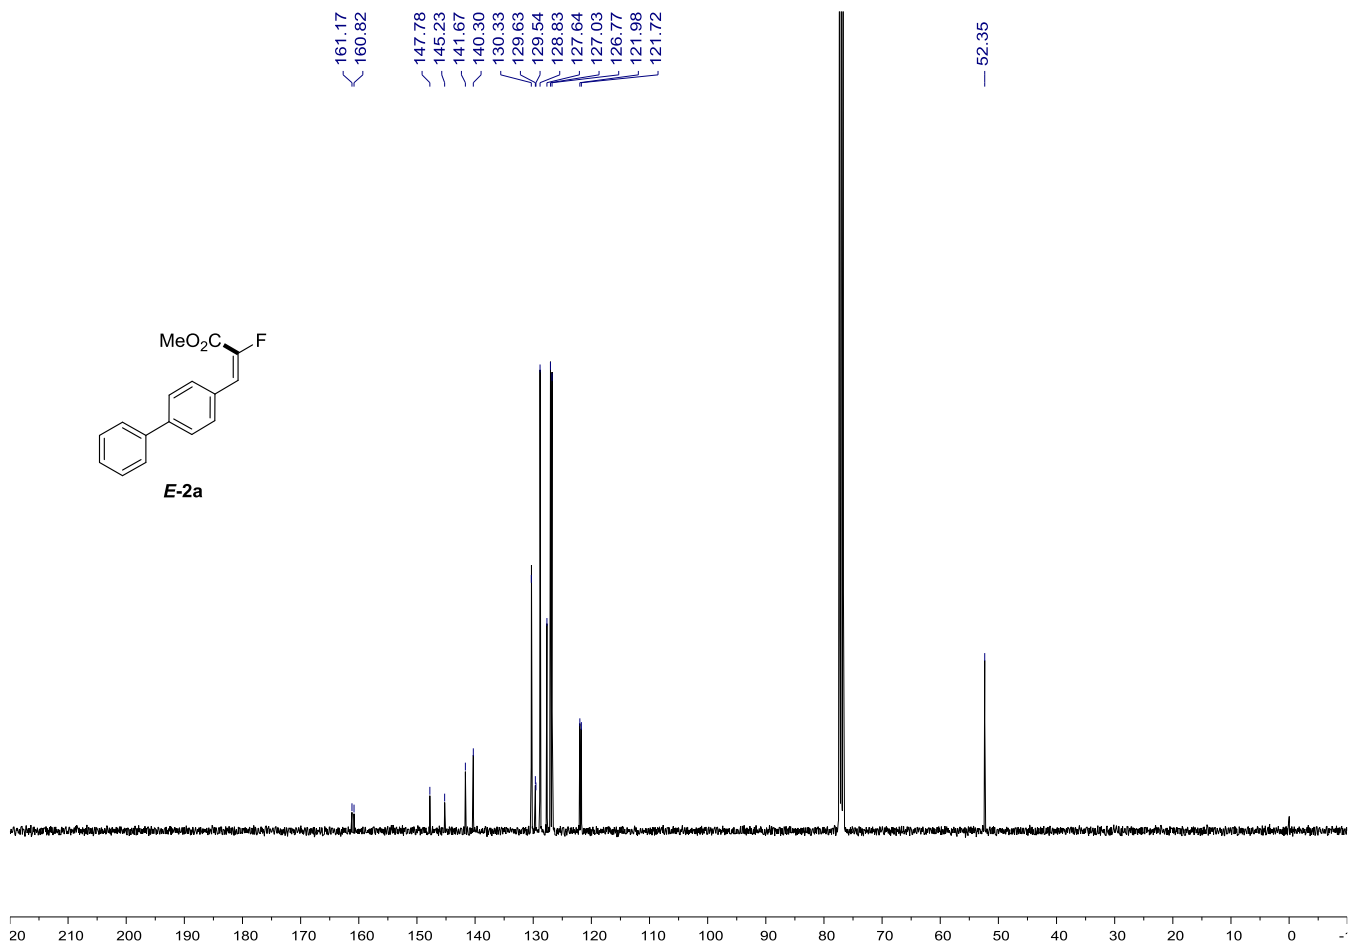



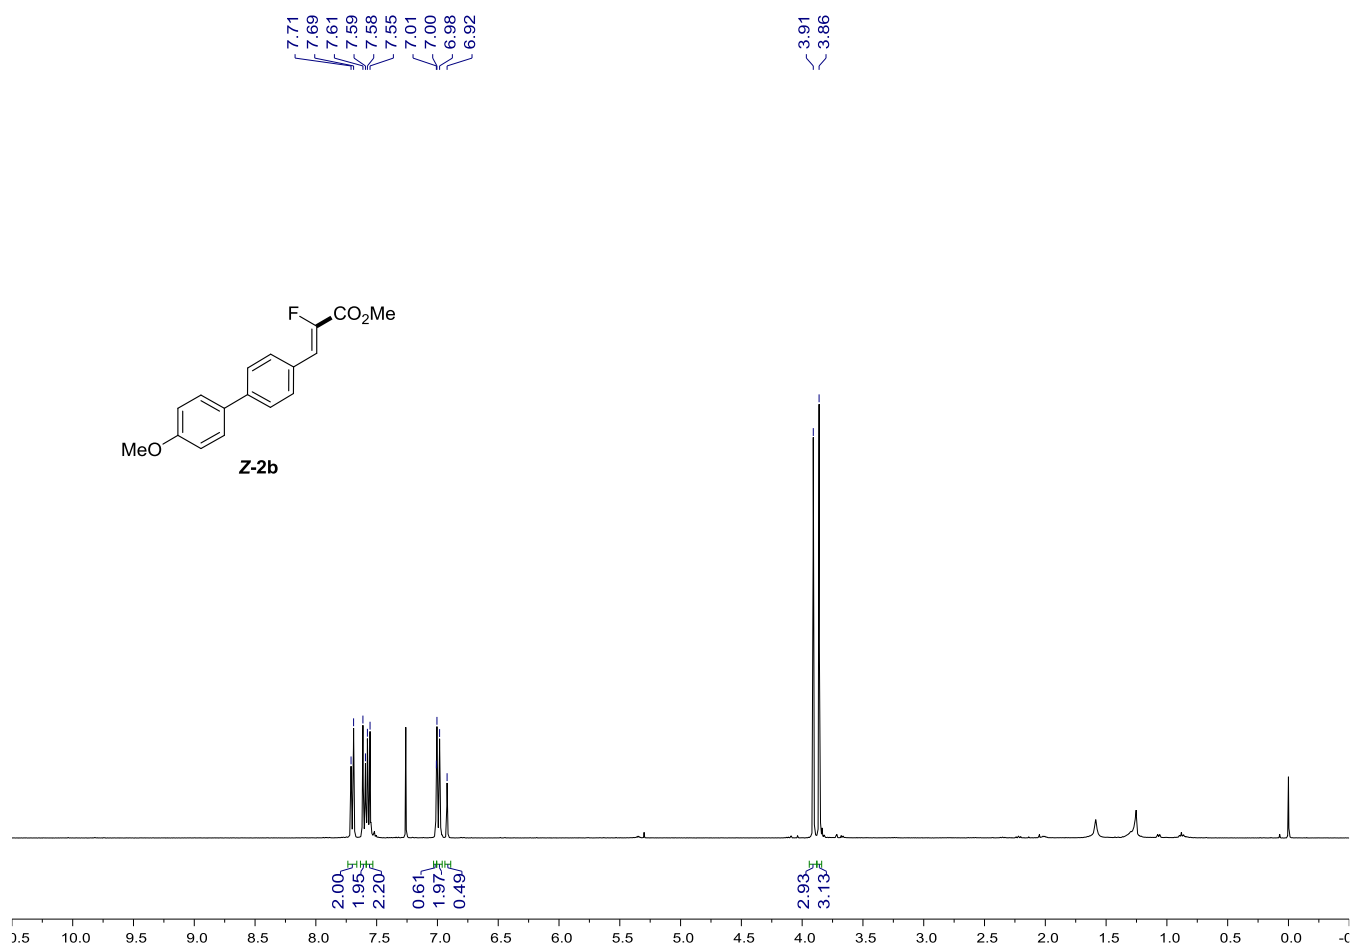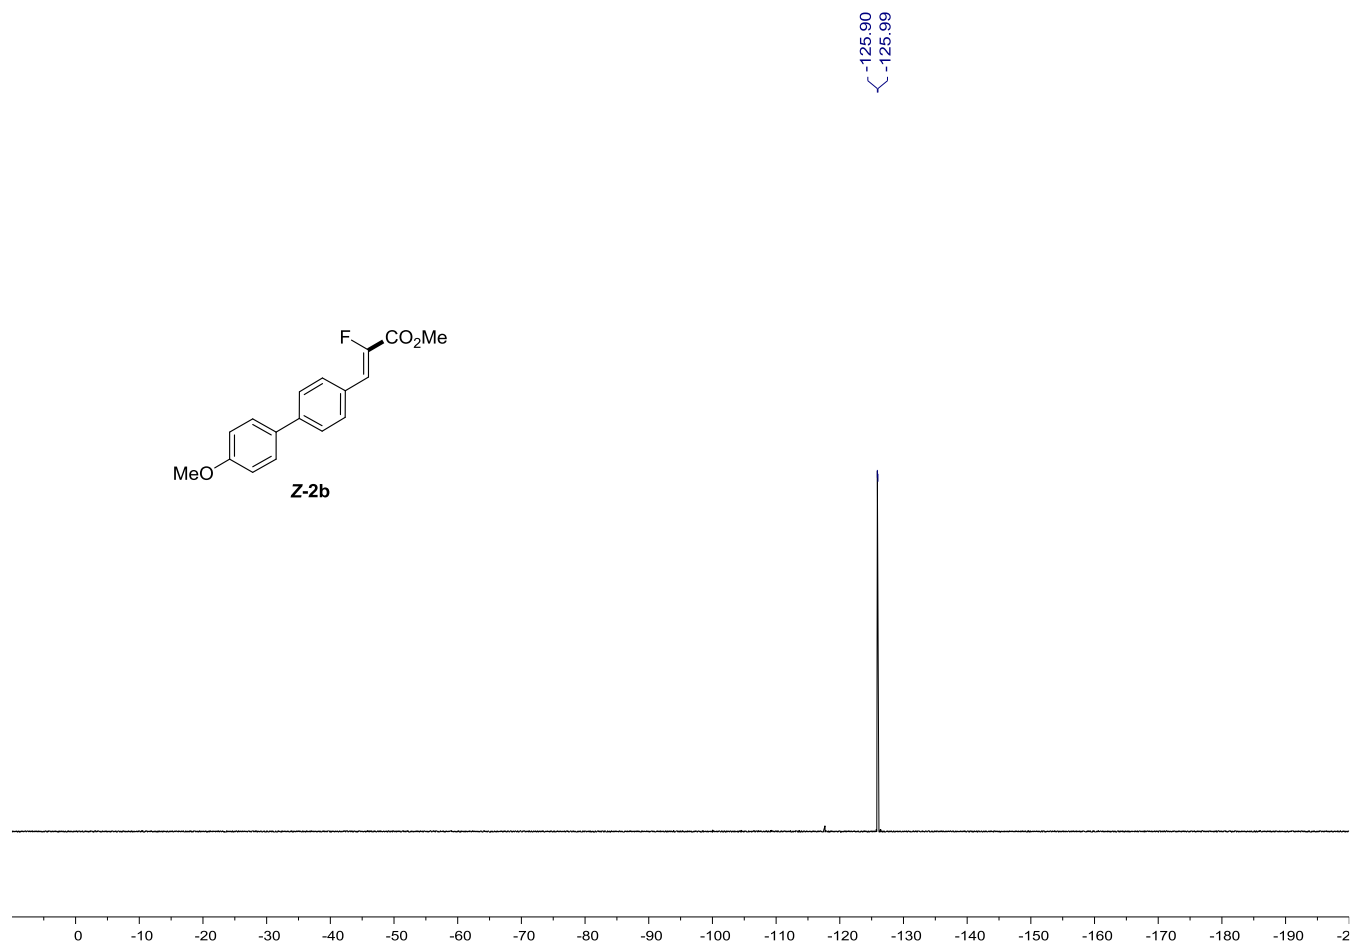

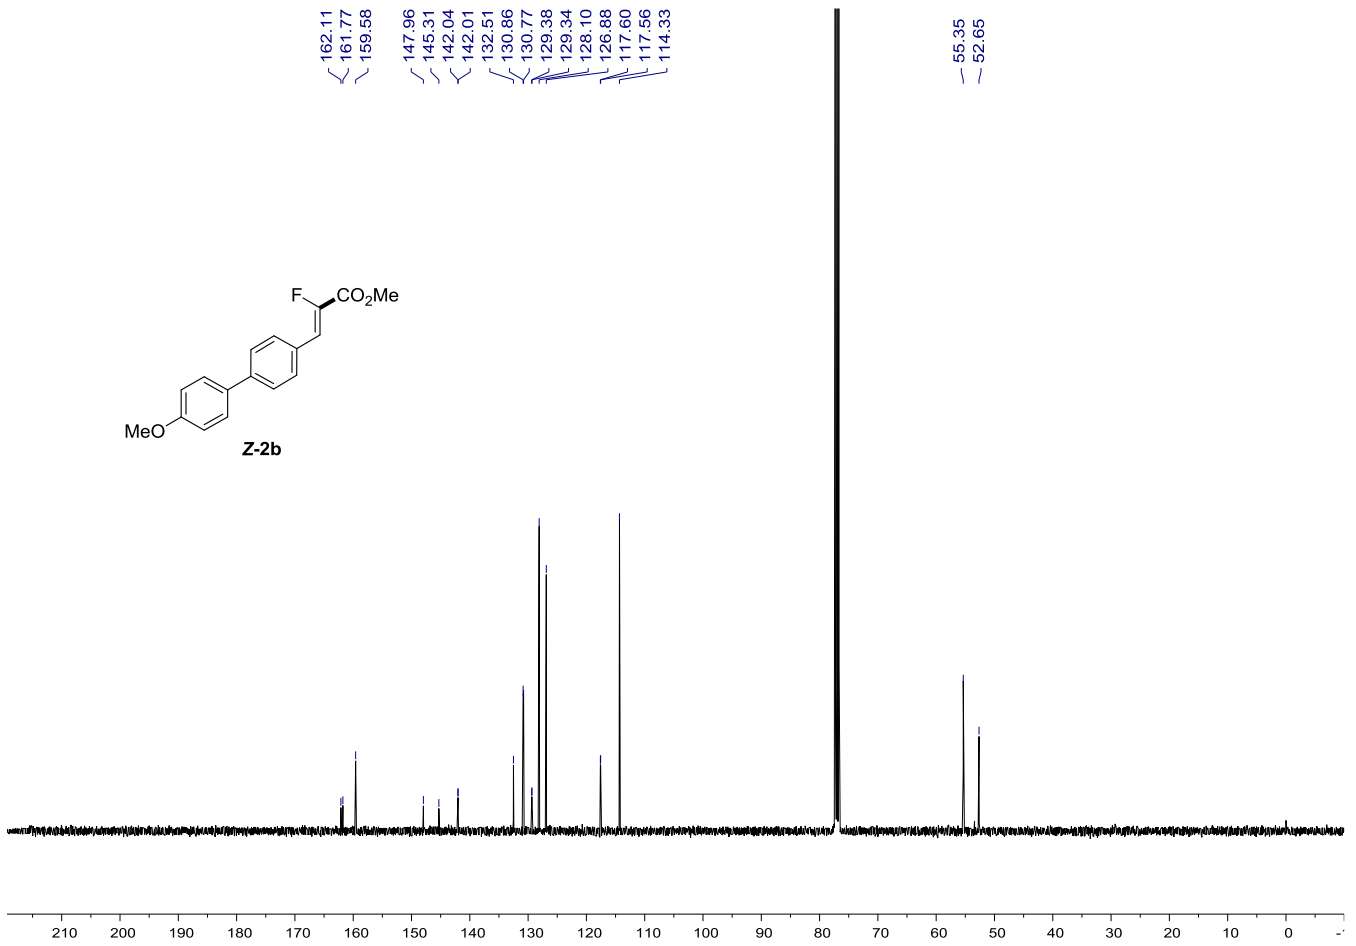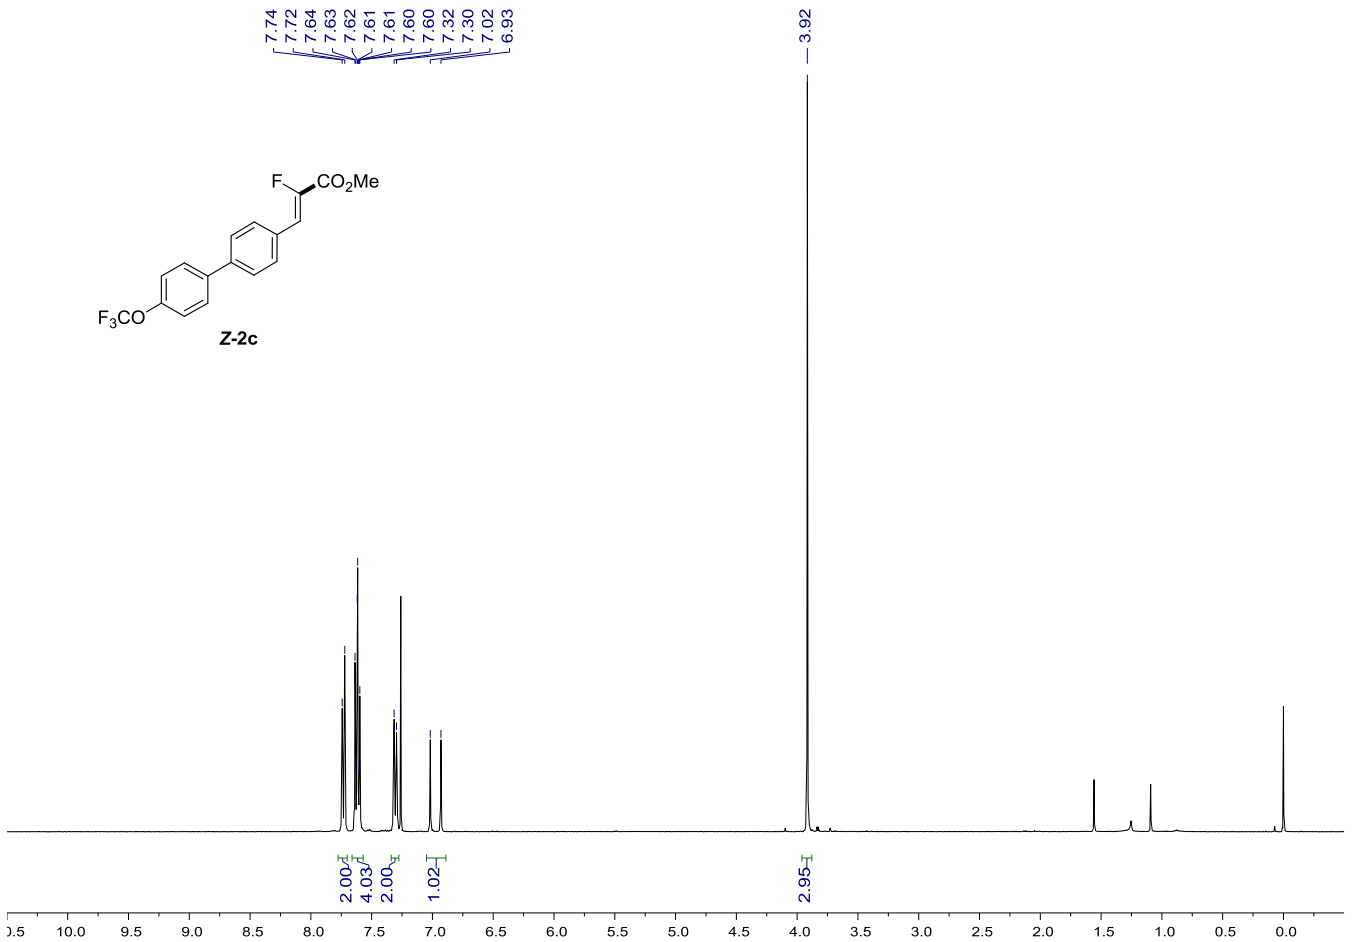

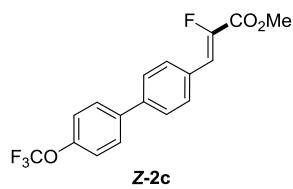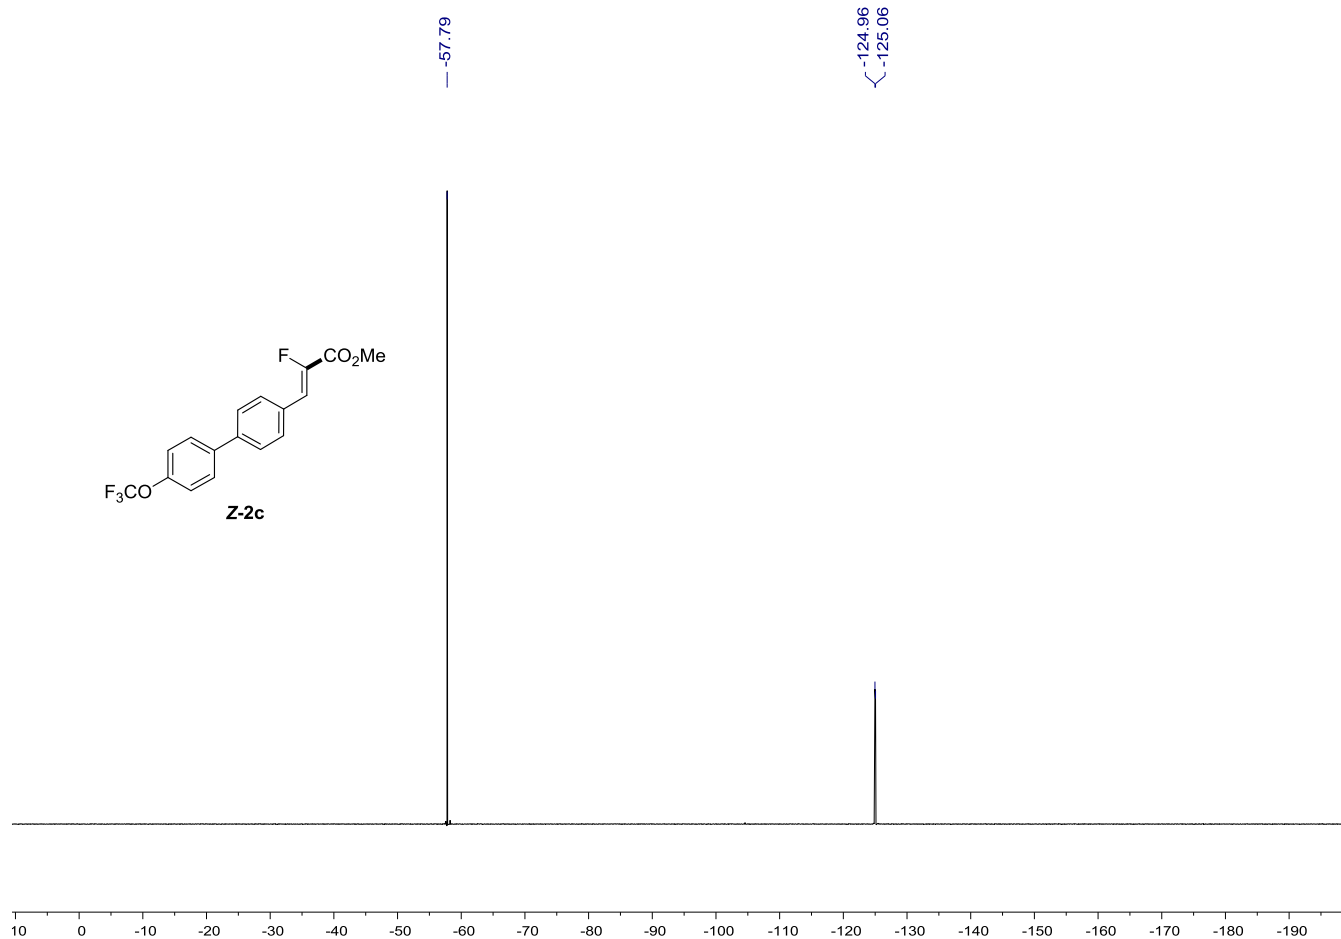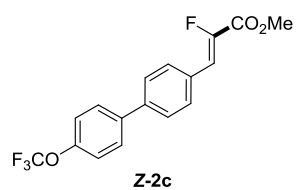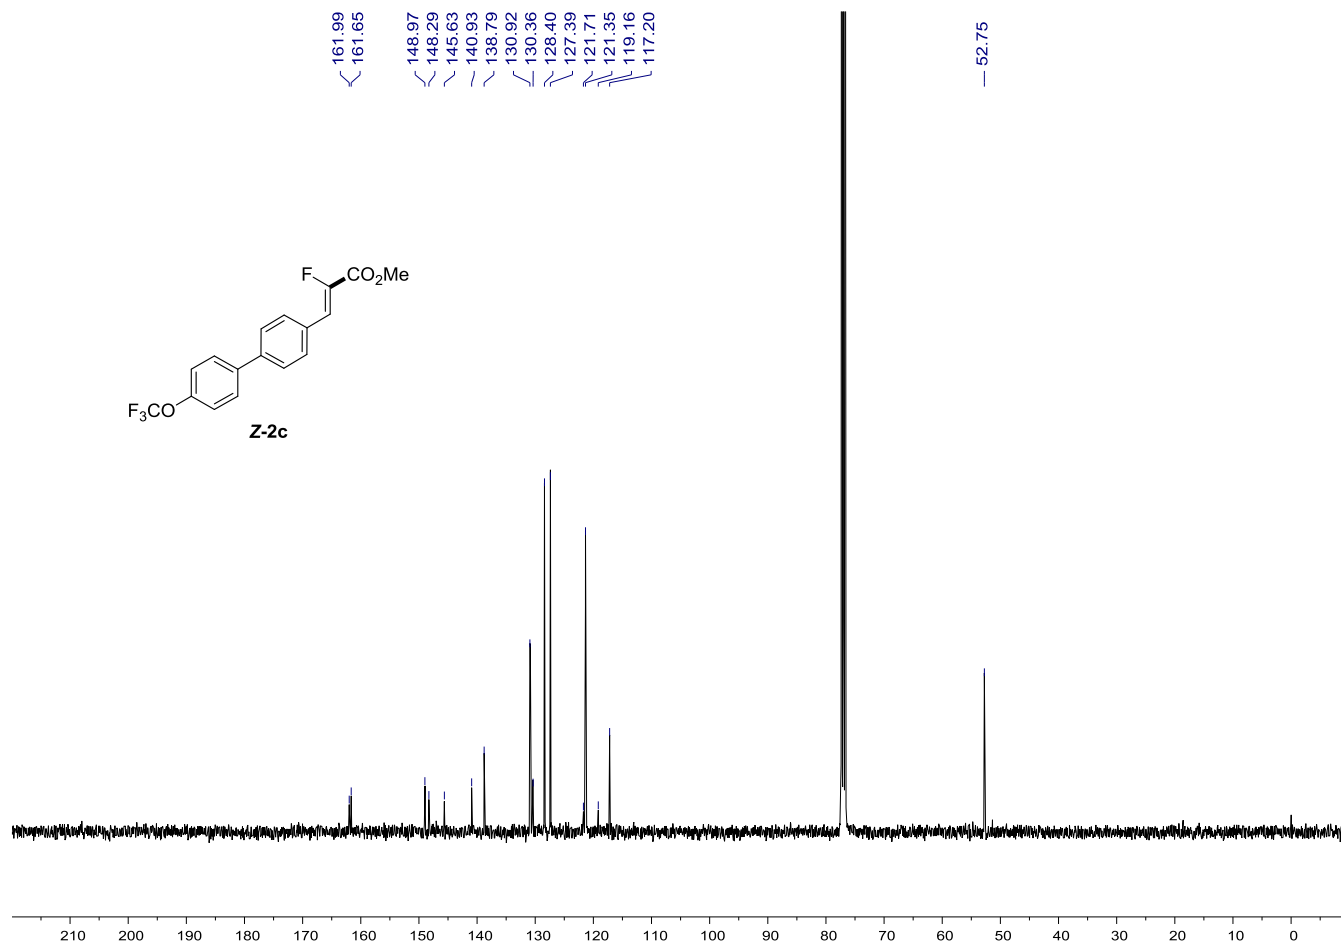

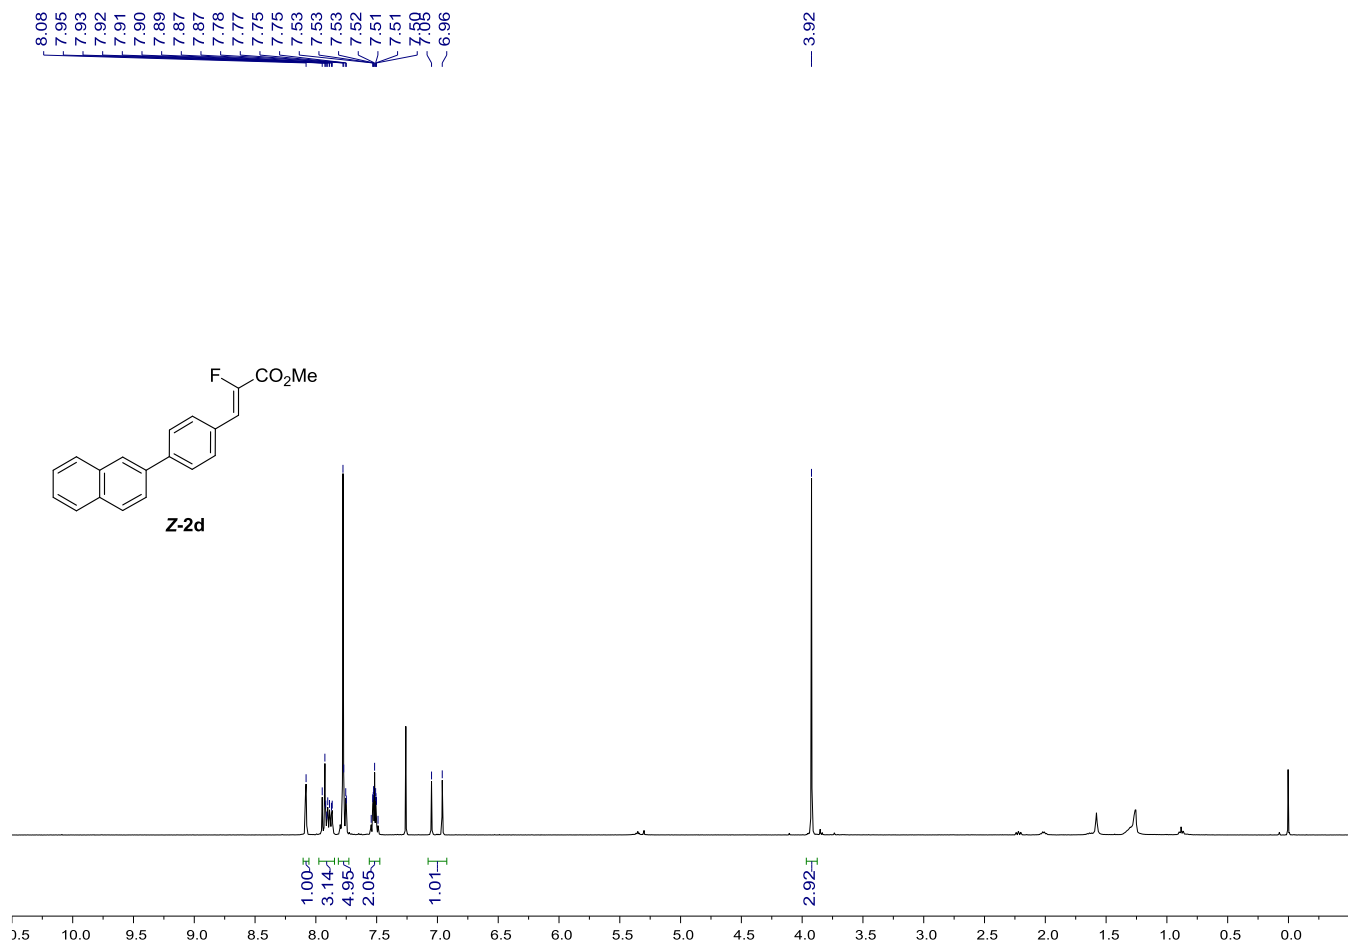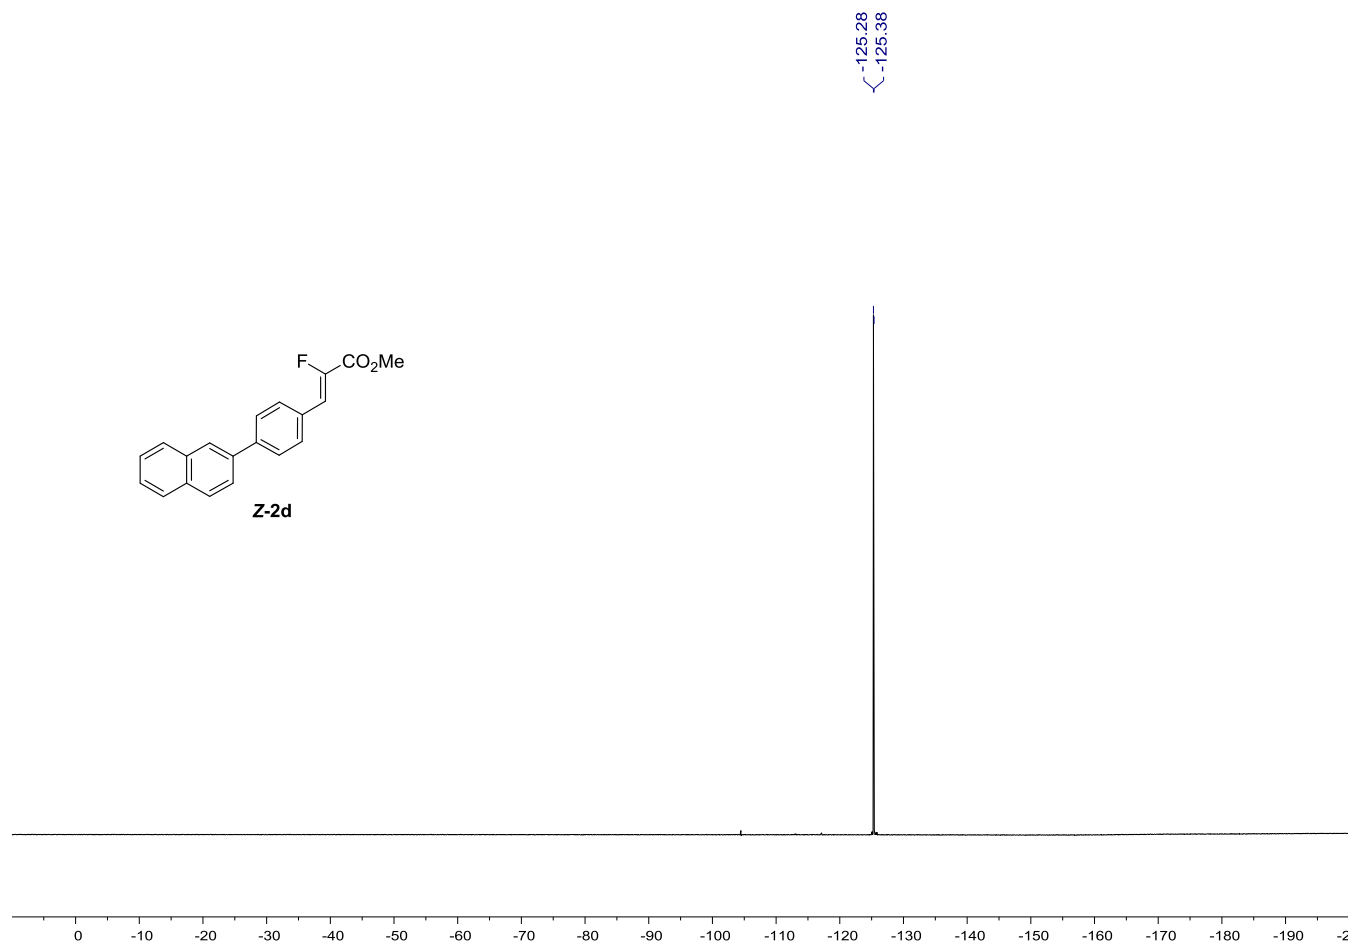

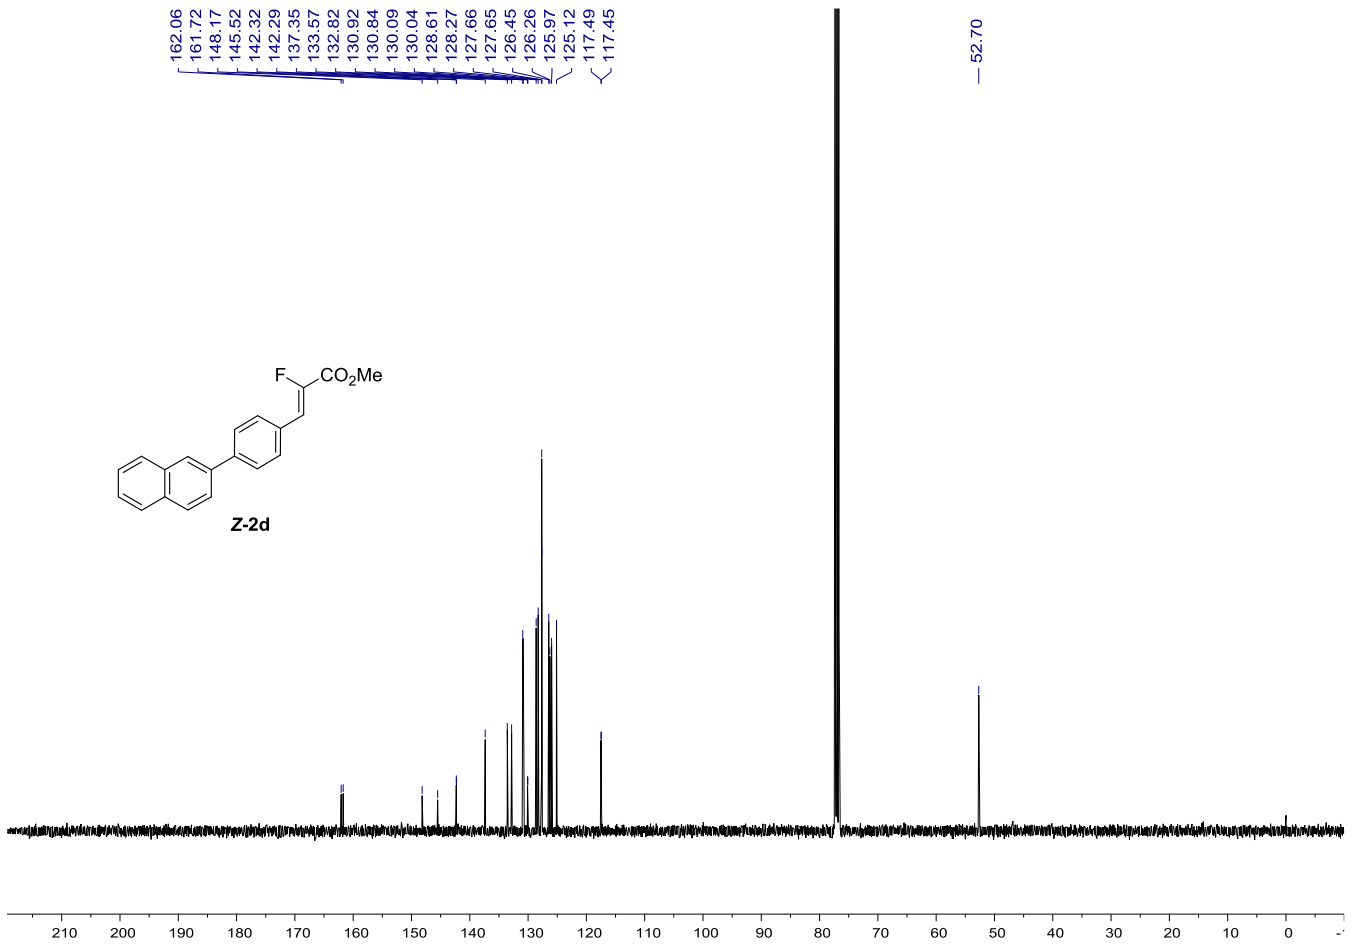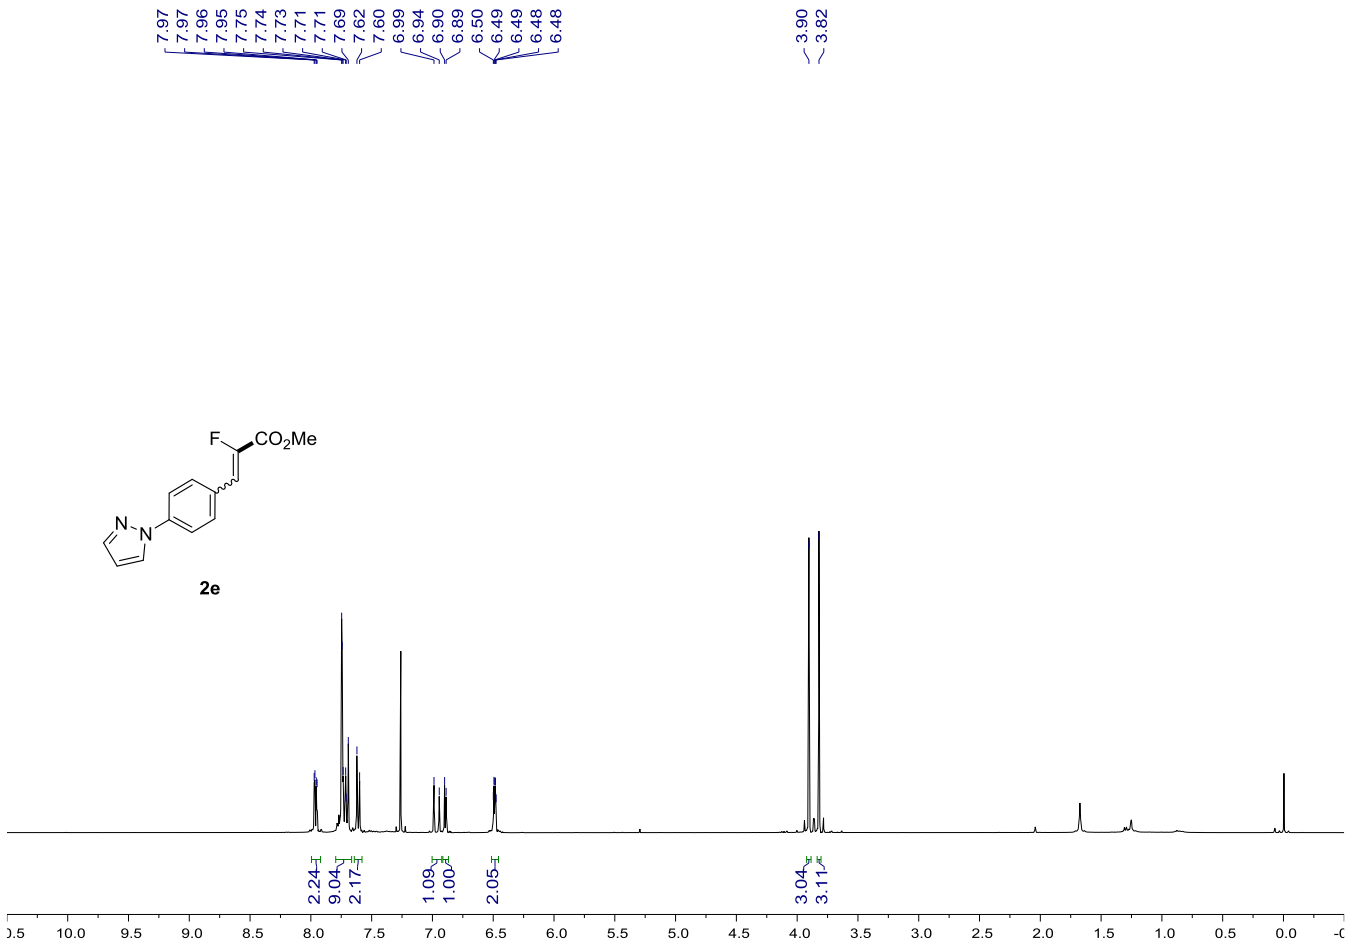

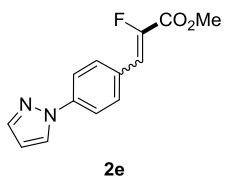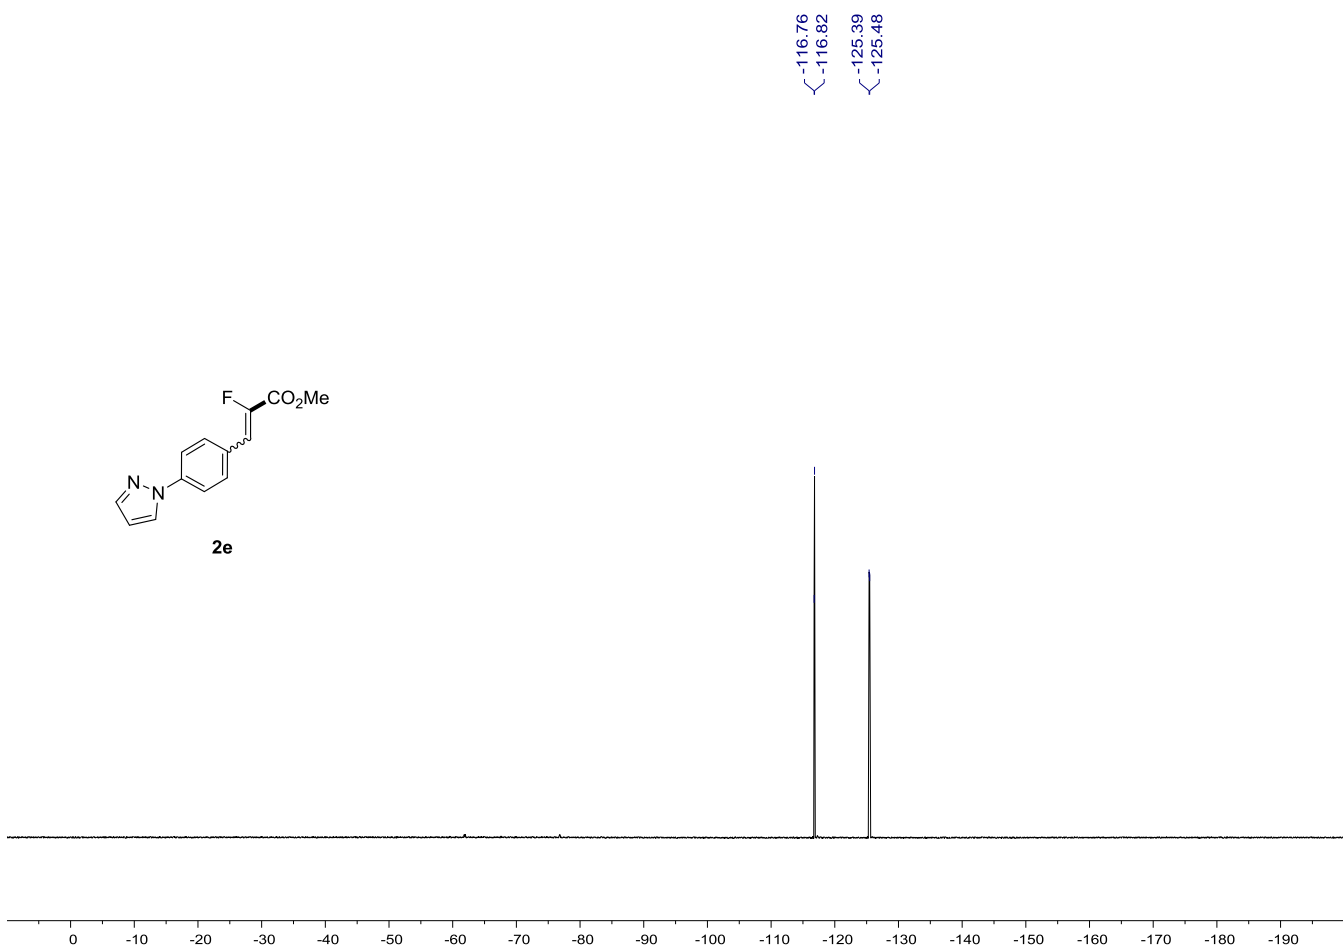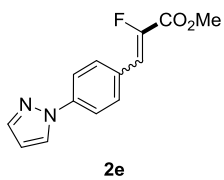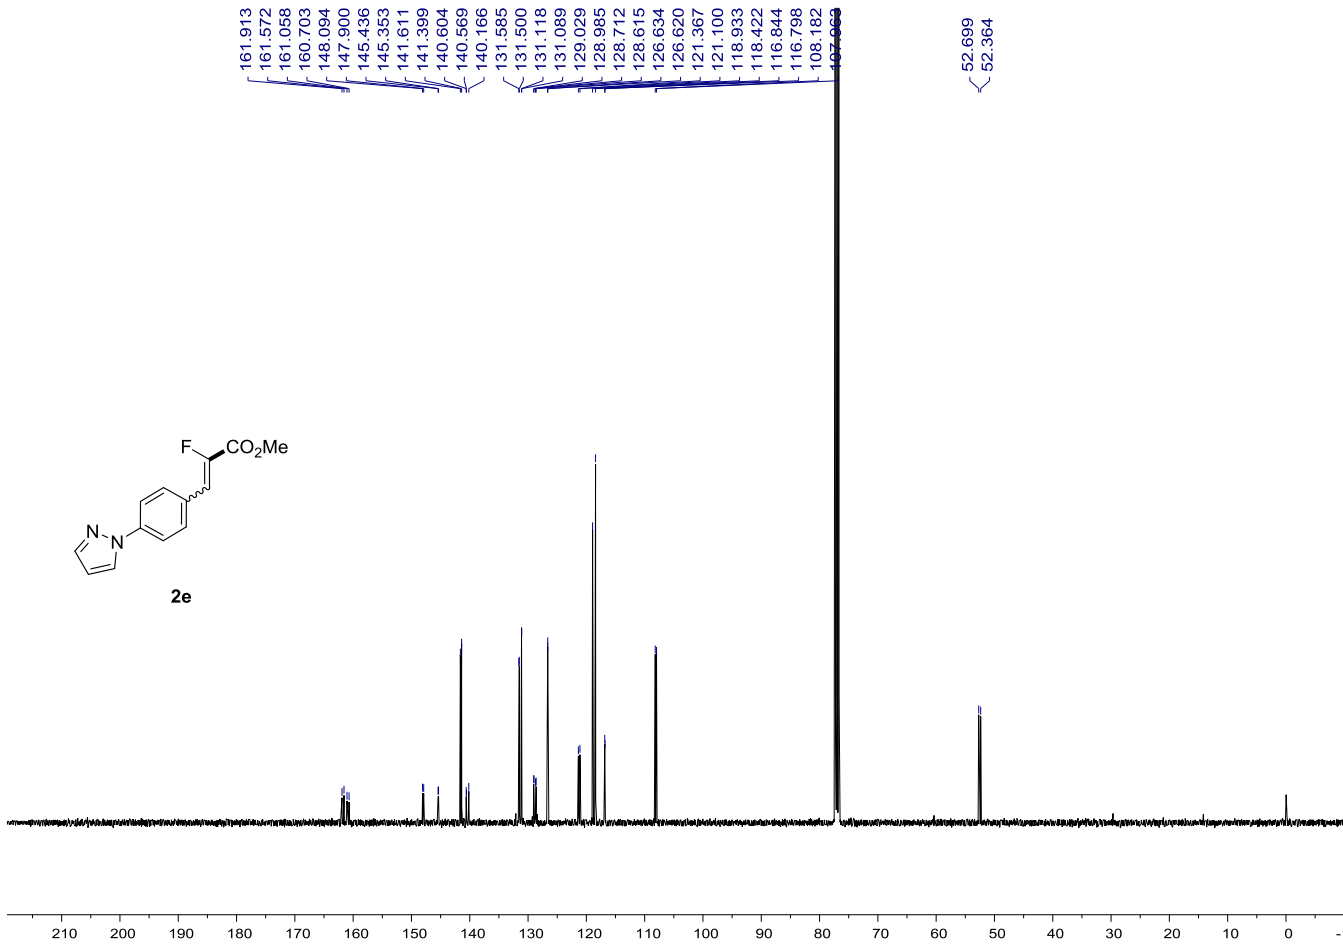

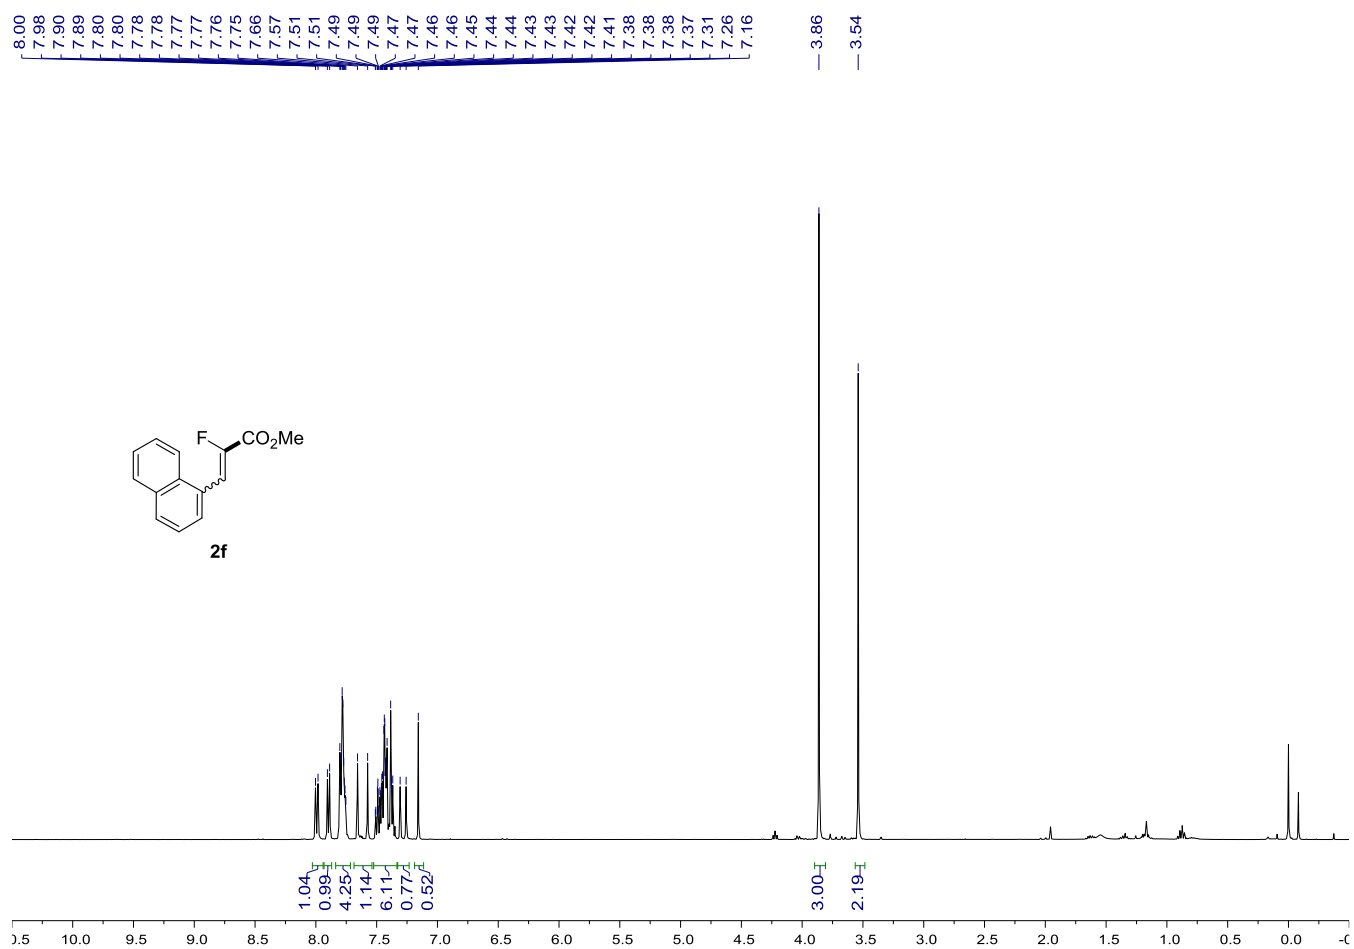

Chemical shift (ppm): -116.37, -116.42, -126.17, -126.26

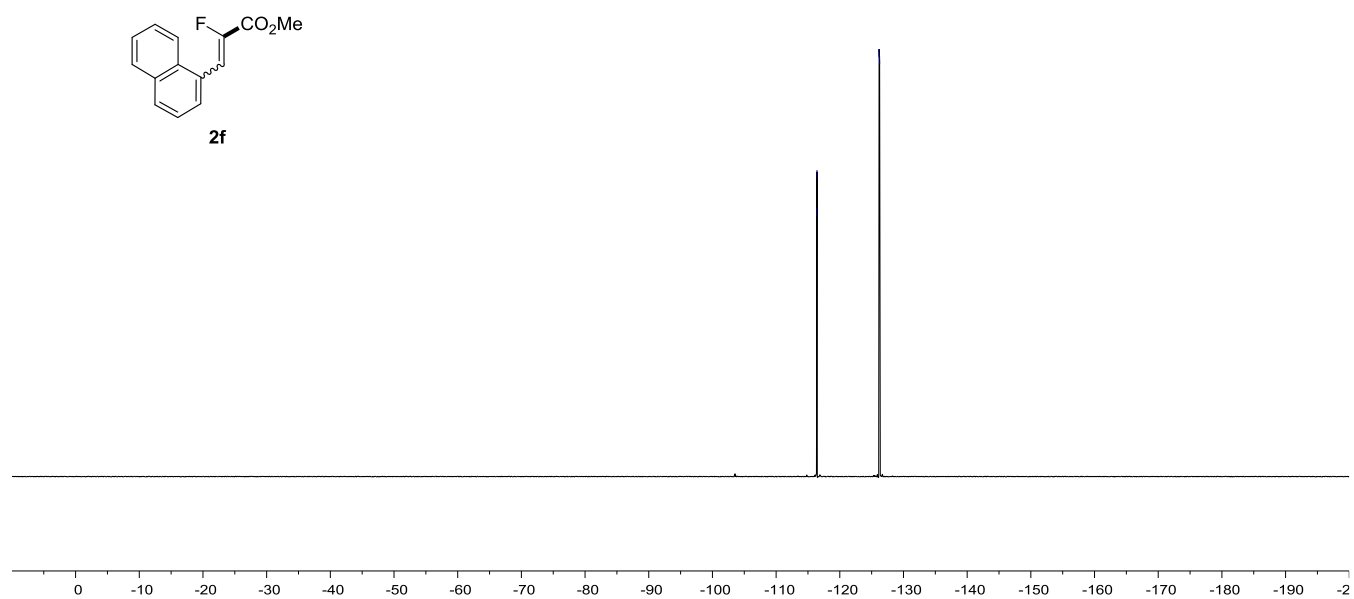

162.01  
161.67  
160.85  
160.49  
149.20  
148.85  
146.64  
146.18  
133.54  
133.23  
131.37  
131.29  
131.26  
130.12  
130.10  
128.98  
128.82  
128.71  
128.56  
128.37  
128.28  
127.34  
127.31  
126.92  
126.88  
126.86  
126.46  
126.08  
126.02  
125.41  
125.00  
124.27  
123.35  
119.51  
119.27  
114.11  
114.06  
52.73  
52.17

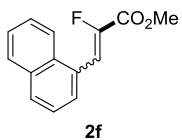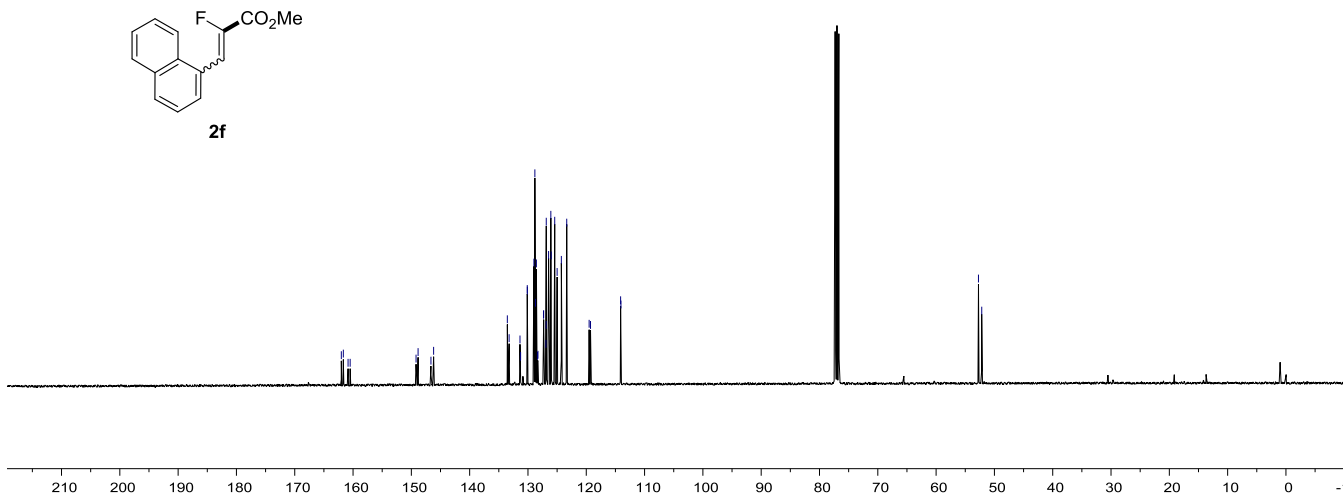

8.10  
7.88  
7.87  
7.86  
7.86  
7.85  
7.84  
7.83  
7.82  
7.79  
7.77  
7.77  
7.77  
7.54  
7.53  
7.53  
7.52  
7.52  
7.51  
7.51  
7.51  
7.05

3.93

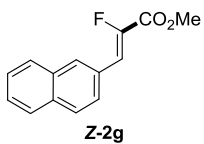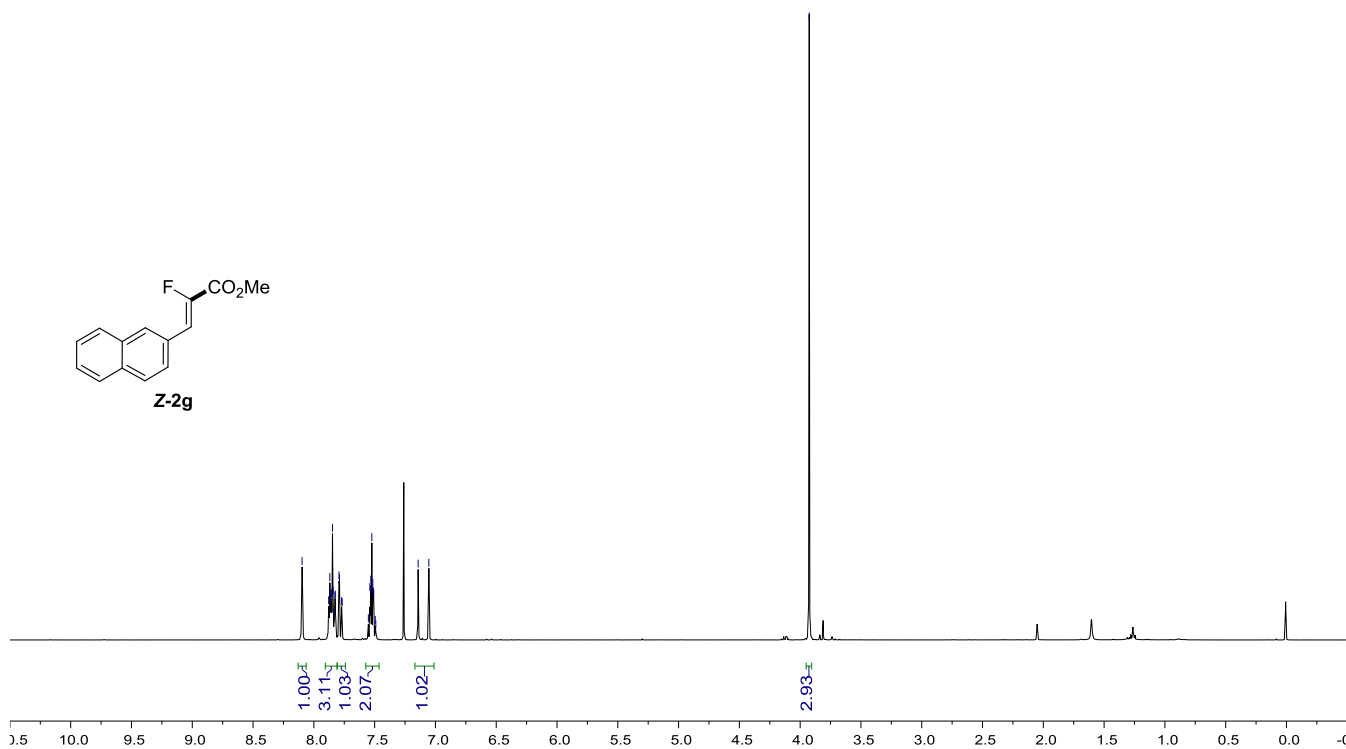



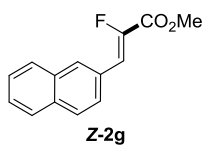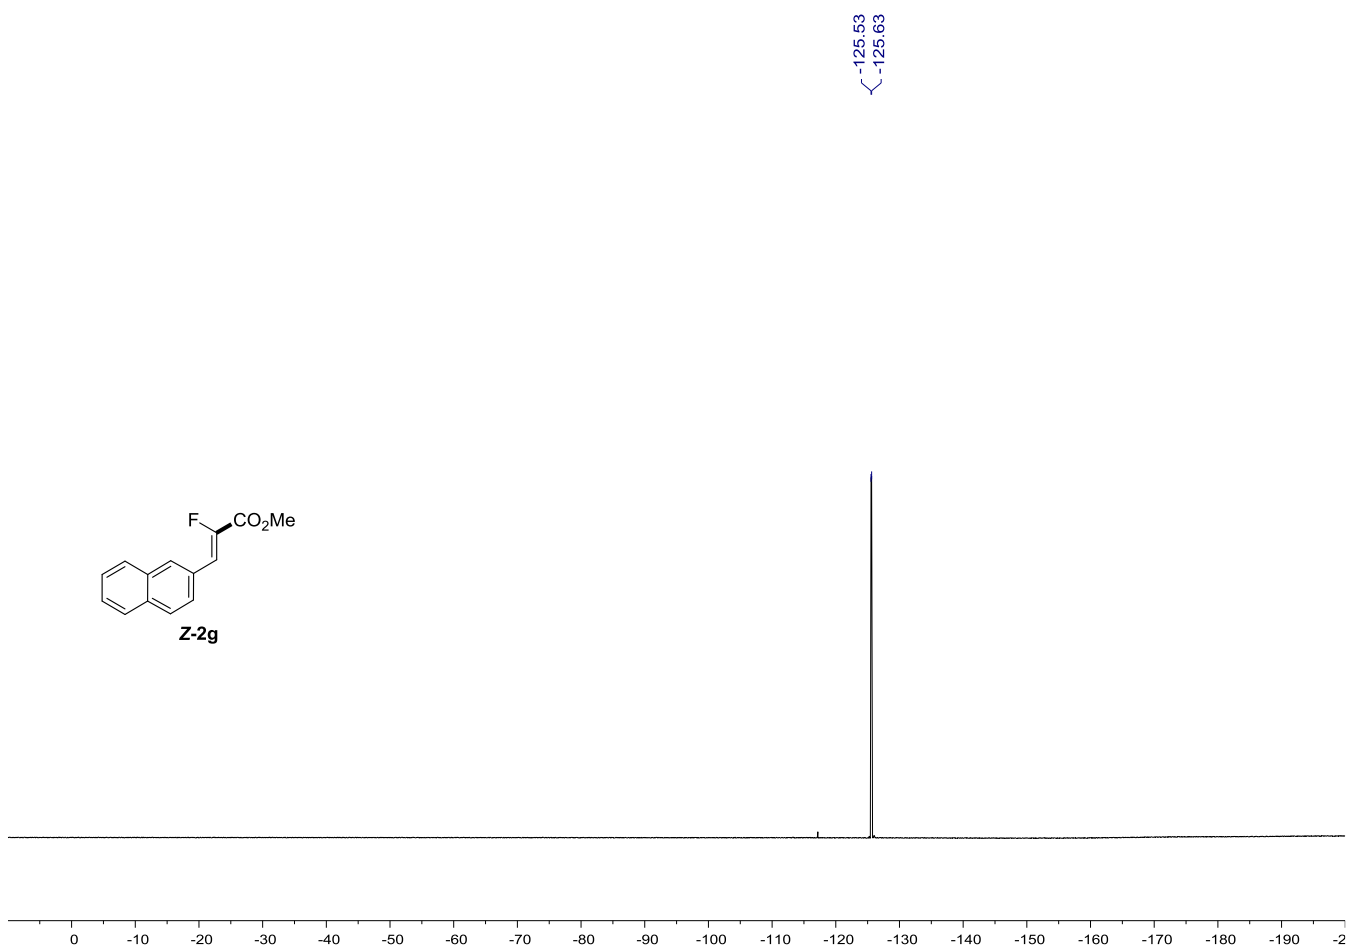

$\delta$  162.10  
 $\delta$  161.75  
 $\delta$  148.23  
 $\delta$  145.57  
 $\delta$  133.59  
 $\delta$  133.10  
 $\delta$  128.57  
 $\delta$  128.49  
 $\delta$  127.64  
 $\delta$  127.31  
 $\delta$  126.80  
 $\delta$  126.58  
 $\delta$  52.69

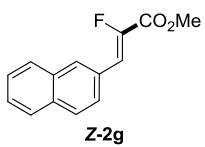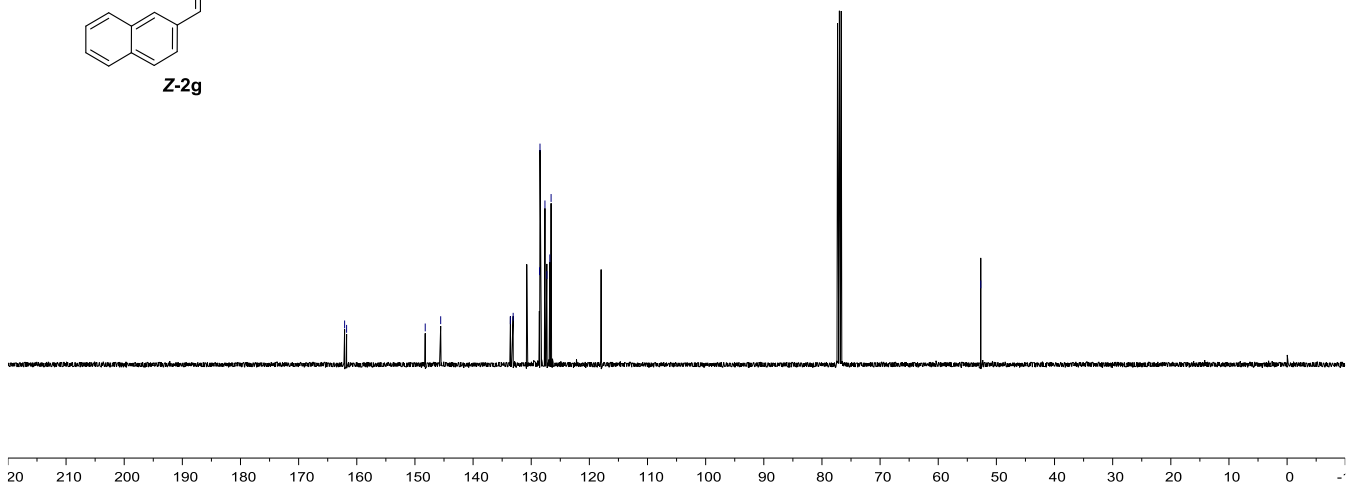

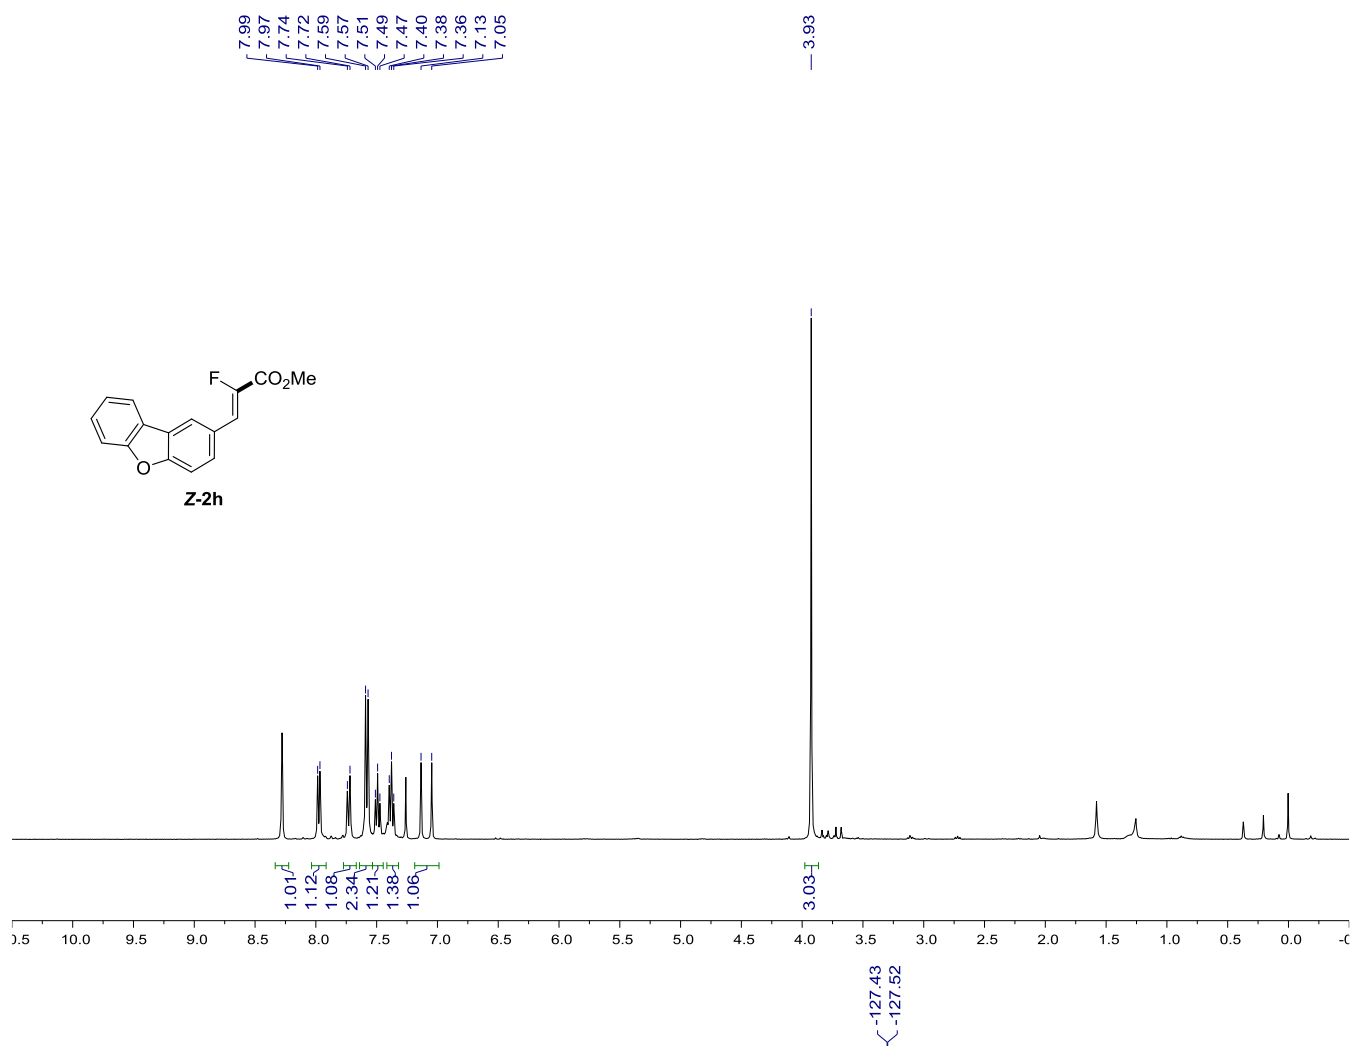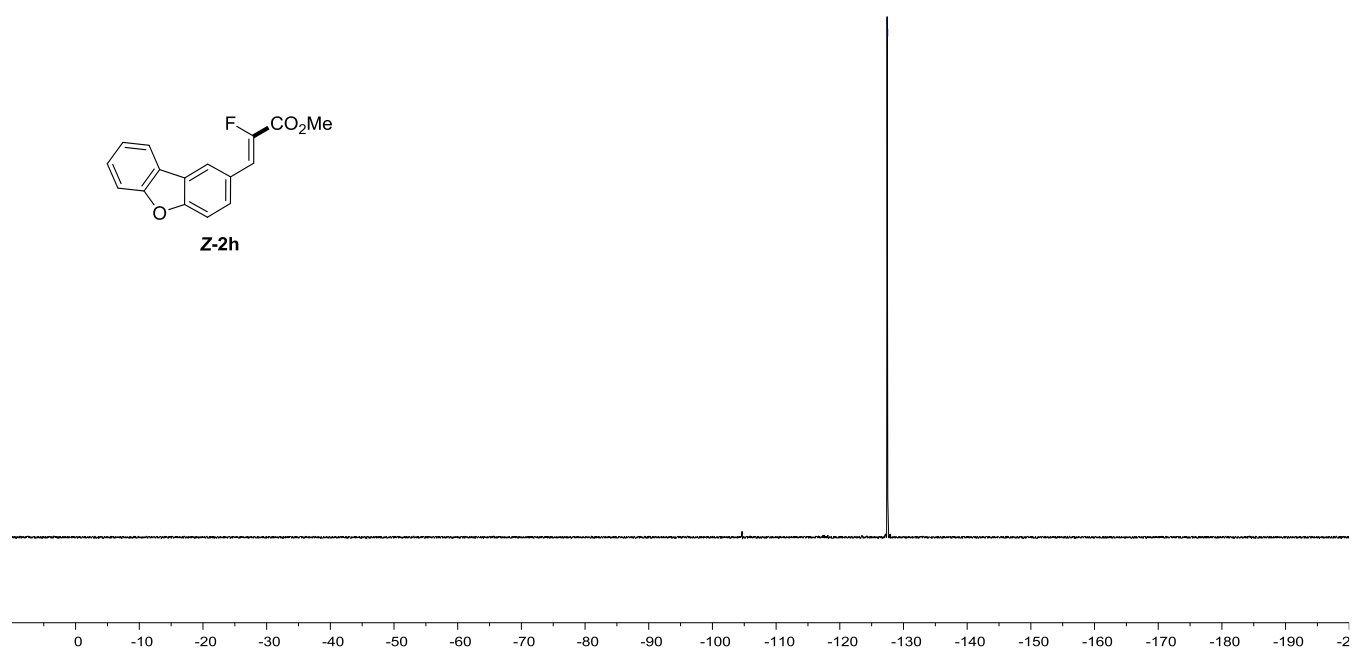

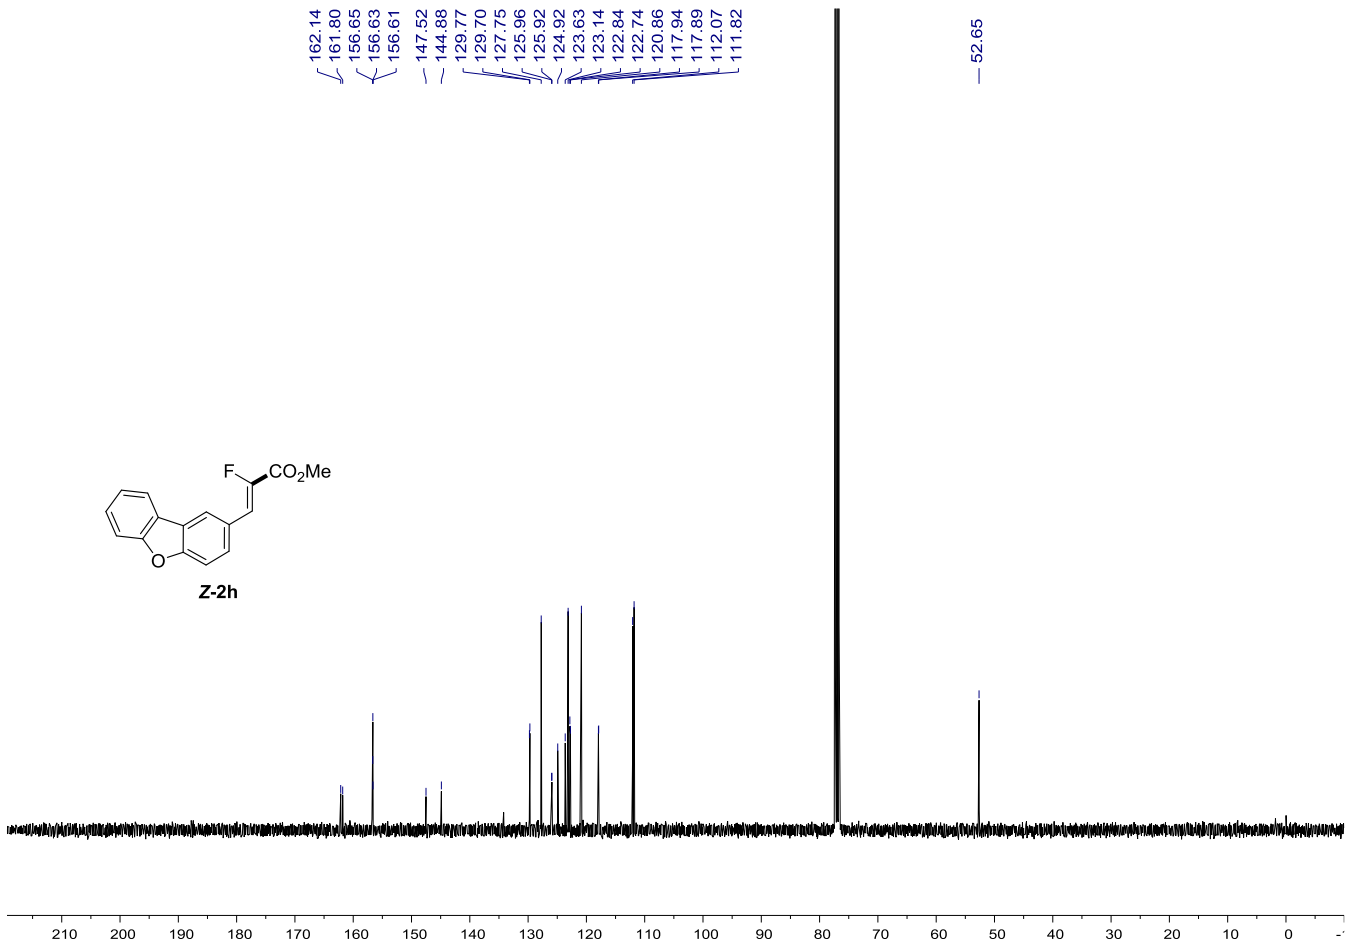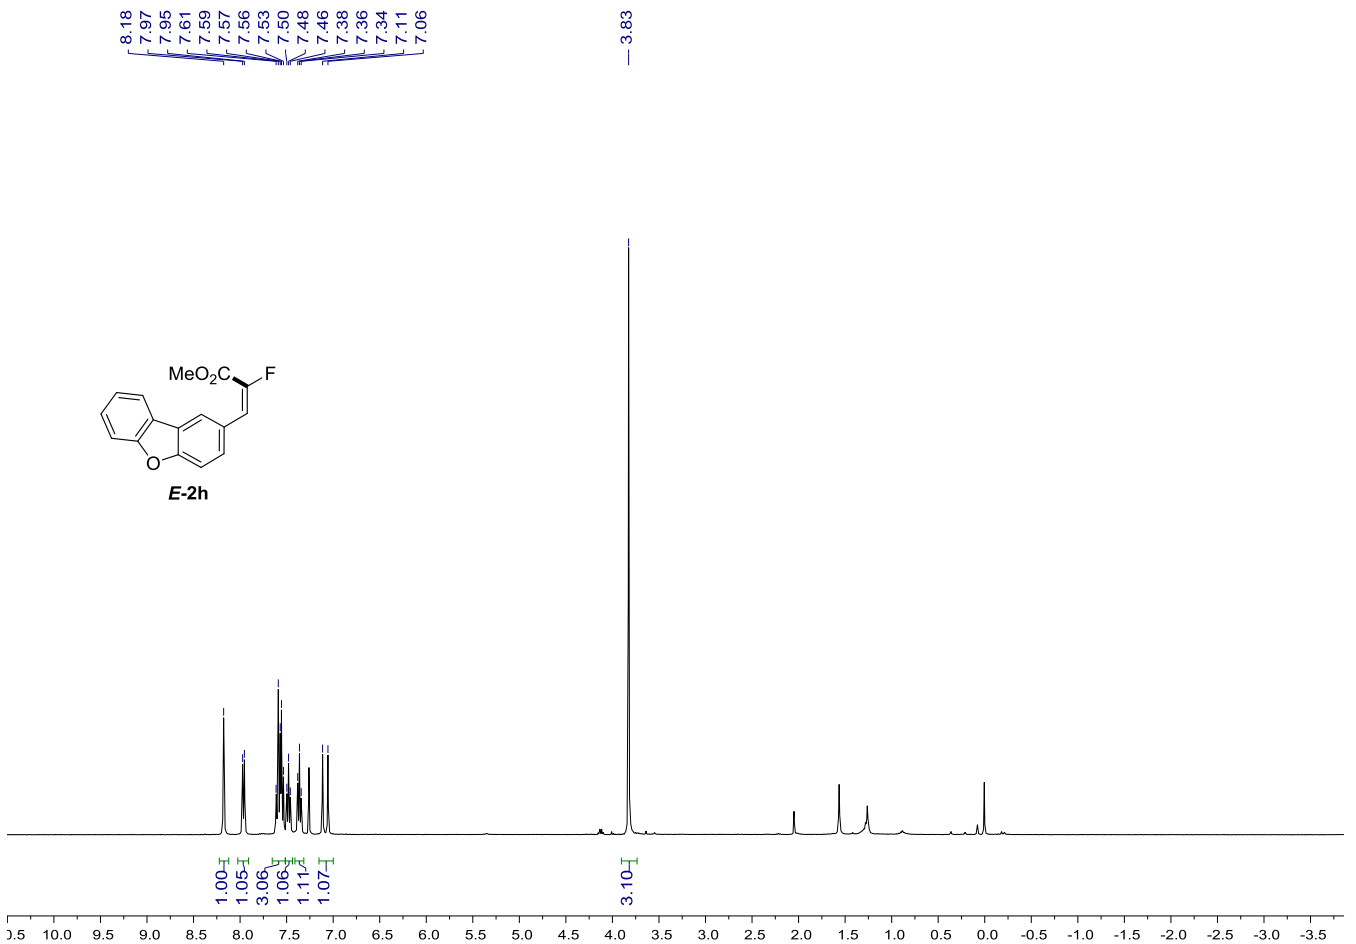

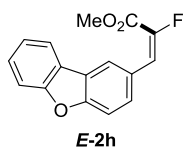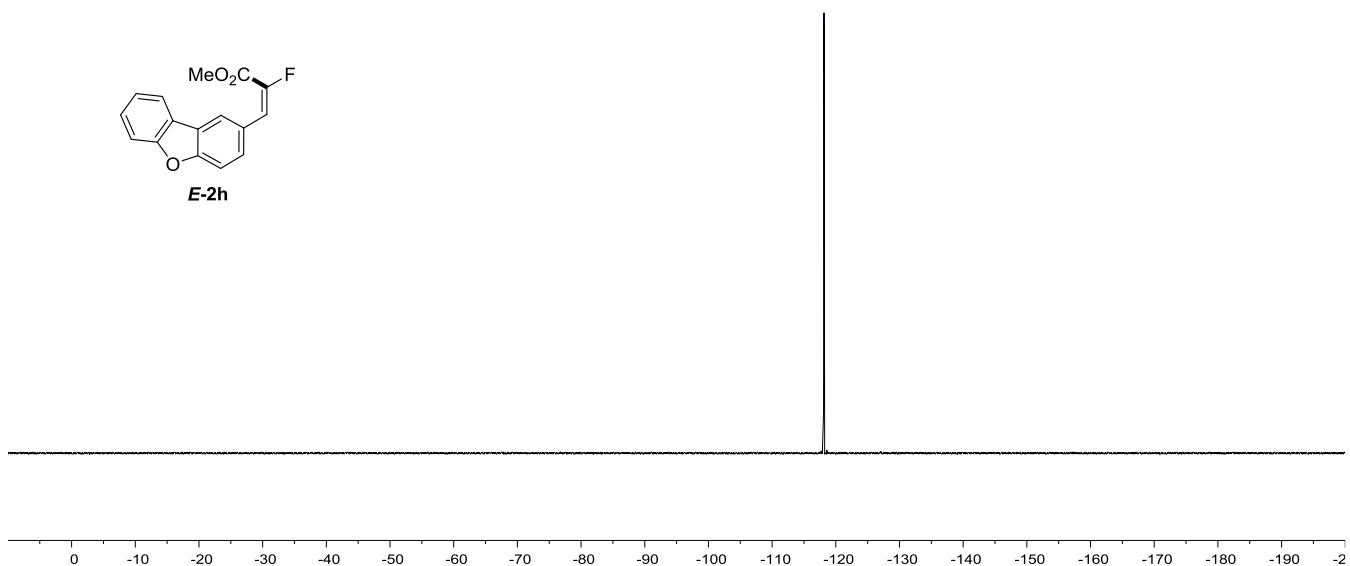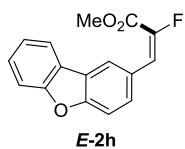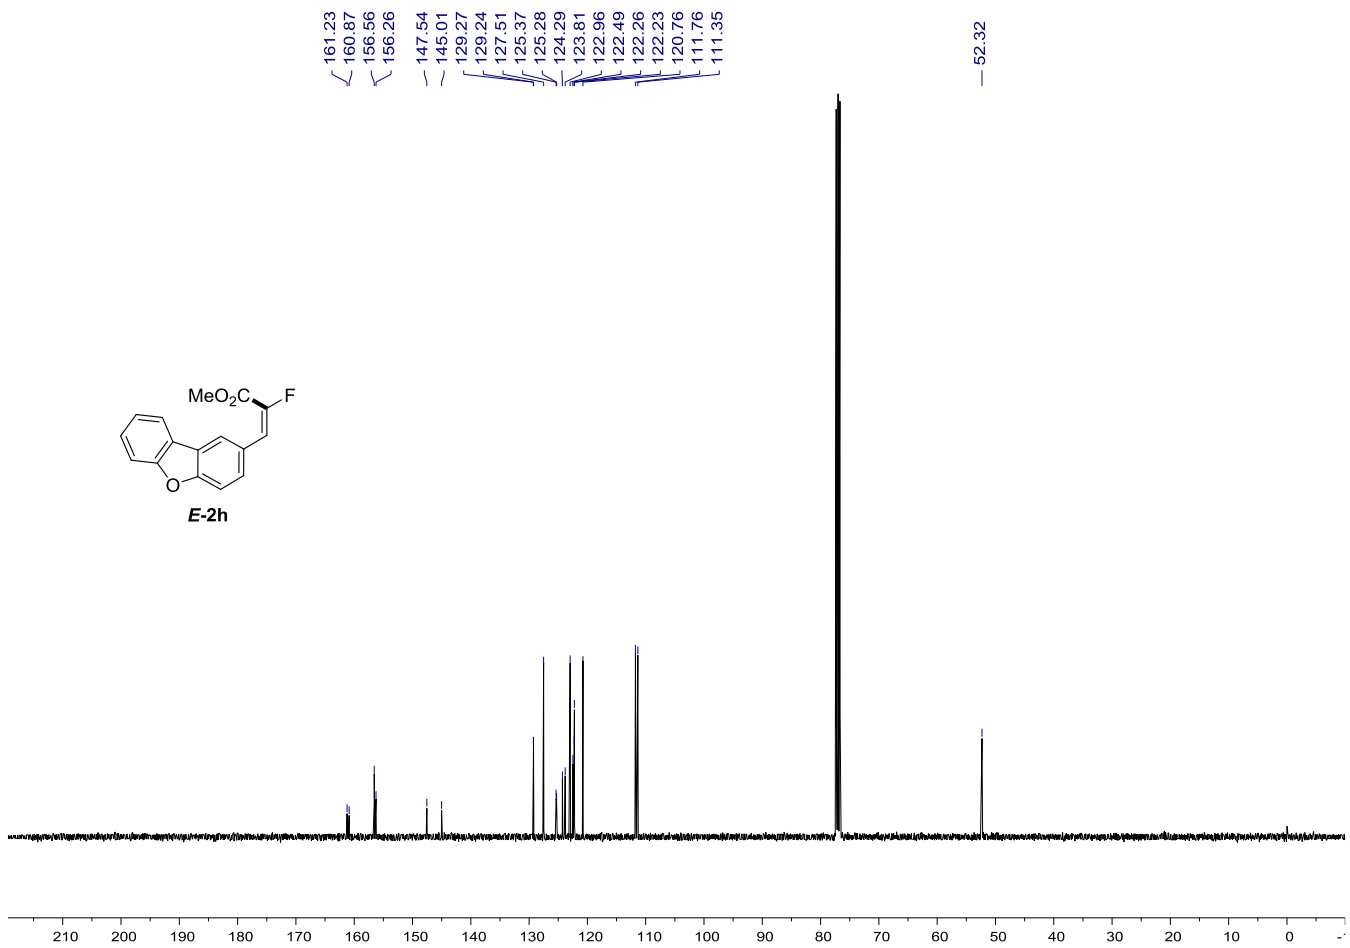

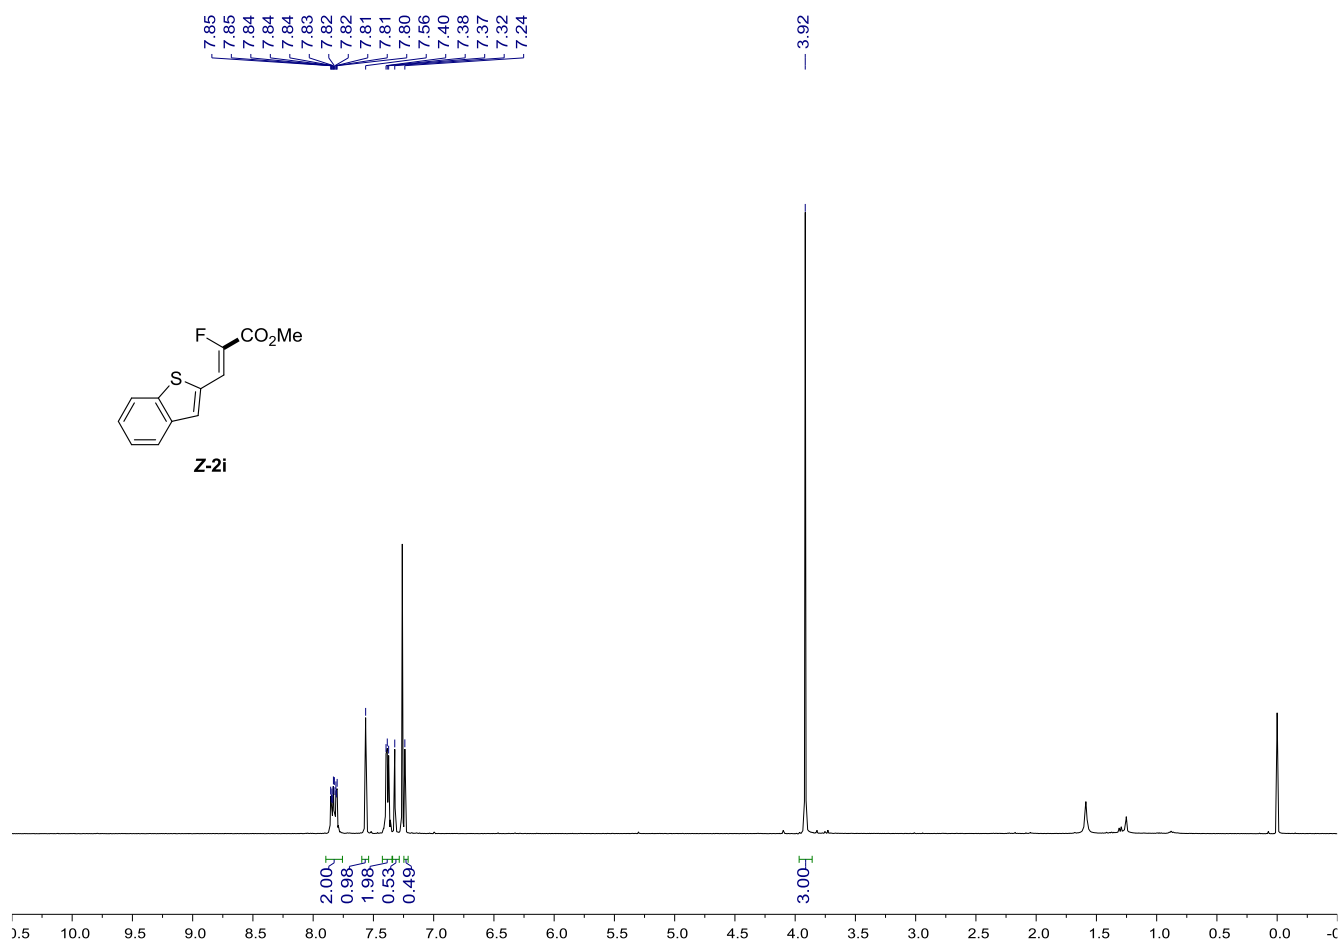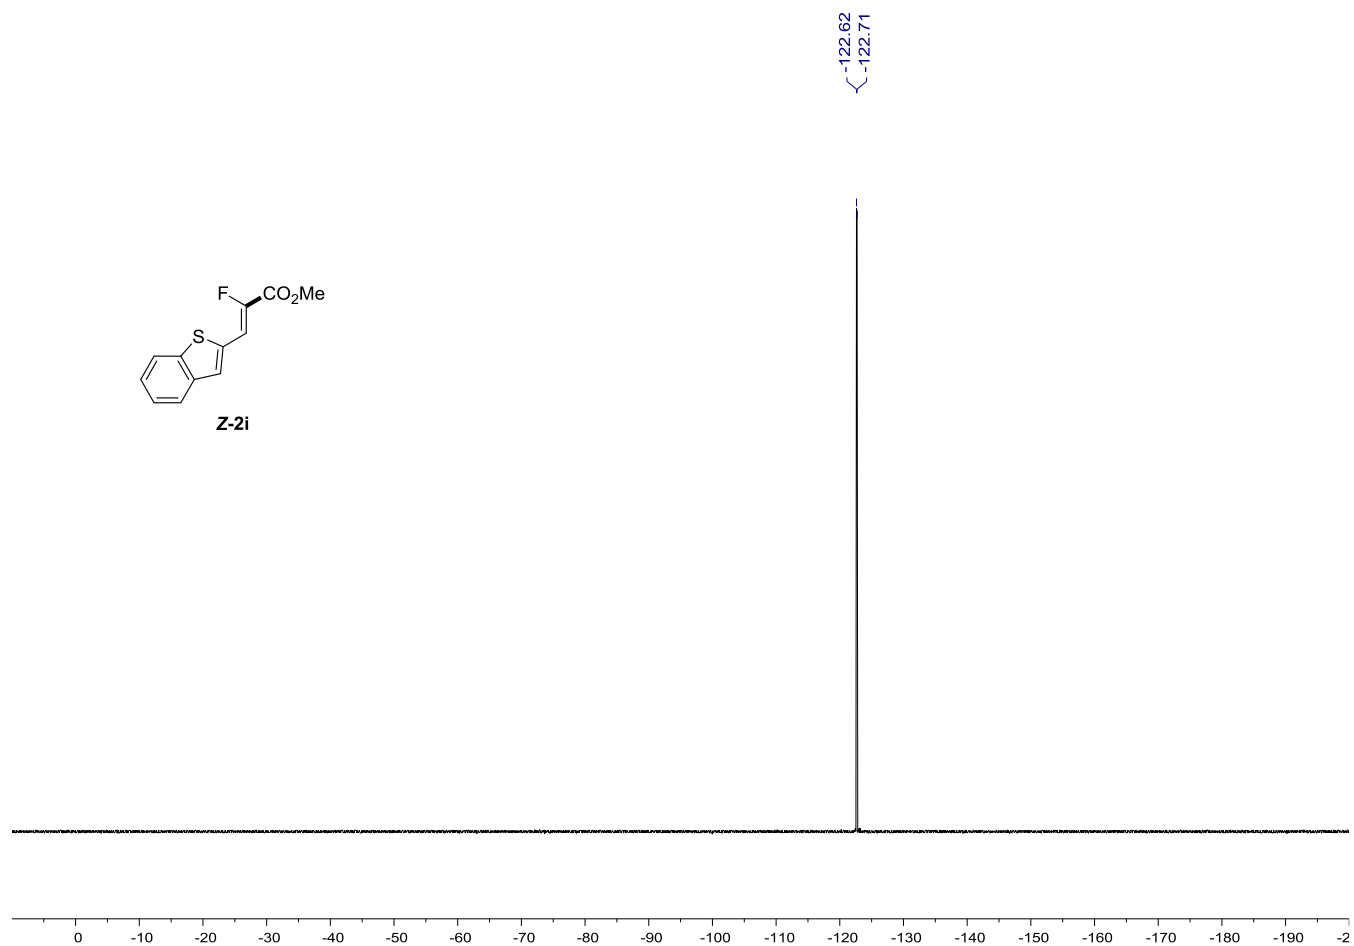

161.44  
161.11  
147.61  
144.94  
141.83  
141.76  
138.73  
133.46  
128.30  
125.87  
124.78  
124.32  
124.30  
122.28  
— 112.62

— 52.76

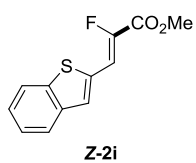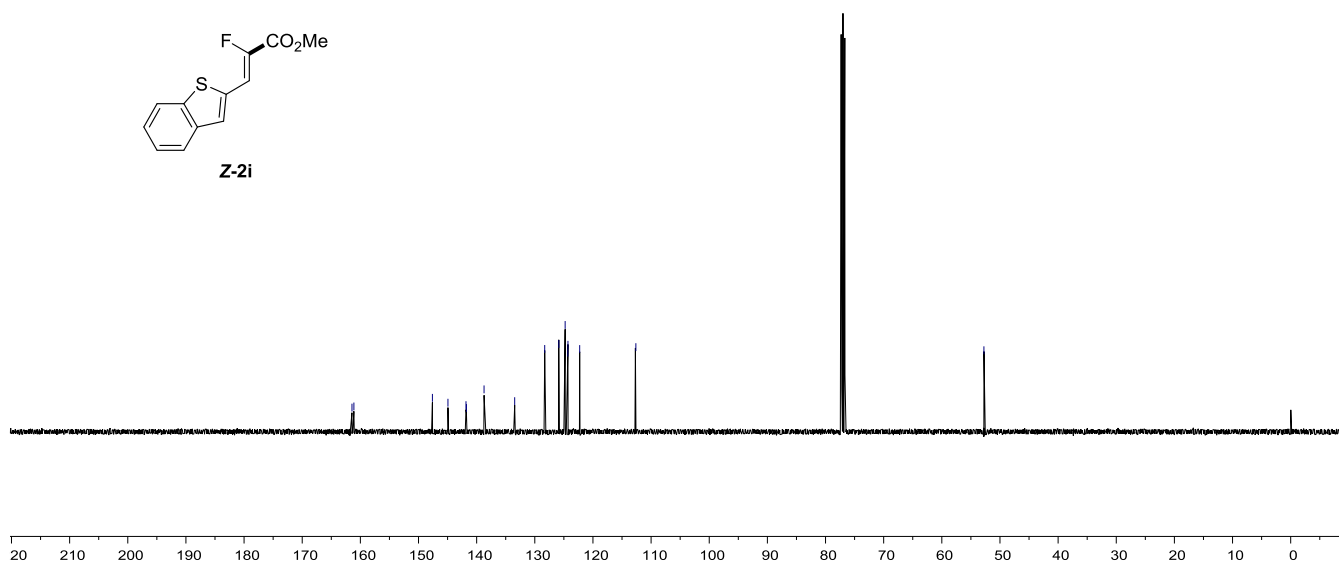

7.85  
7.84  
7.83  
7.83  
7.82  
7.82  
7.81  
7.81  
7.79  
7.78  
7.77  
7.77  
7.75  
7.62  
7.62  
7.61  
7.61  
7.40  
7.40  
7.38  
7.38  
7.38  
7.37  
7.36  
7.36  
7.35  
7.34  
7.34  
7.19  
7.19  
7.13  
7.13

— 3.96

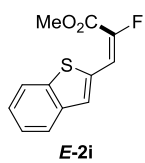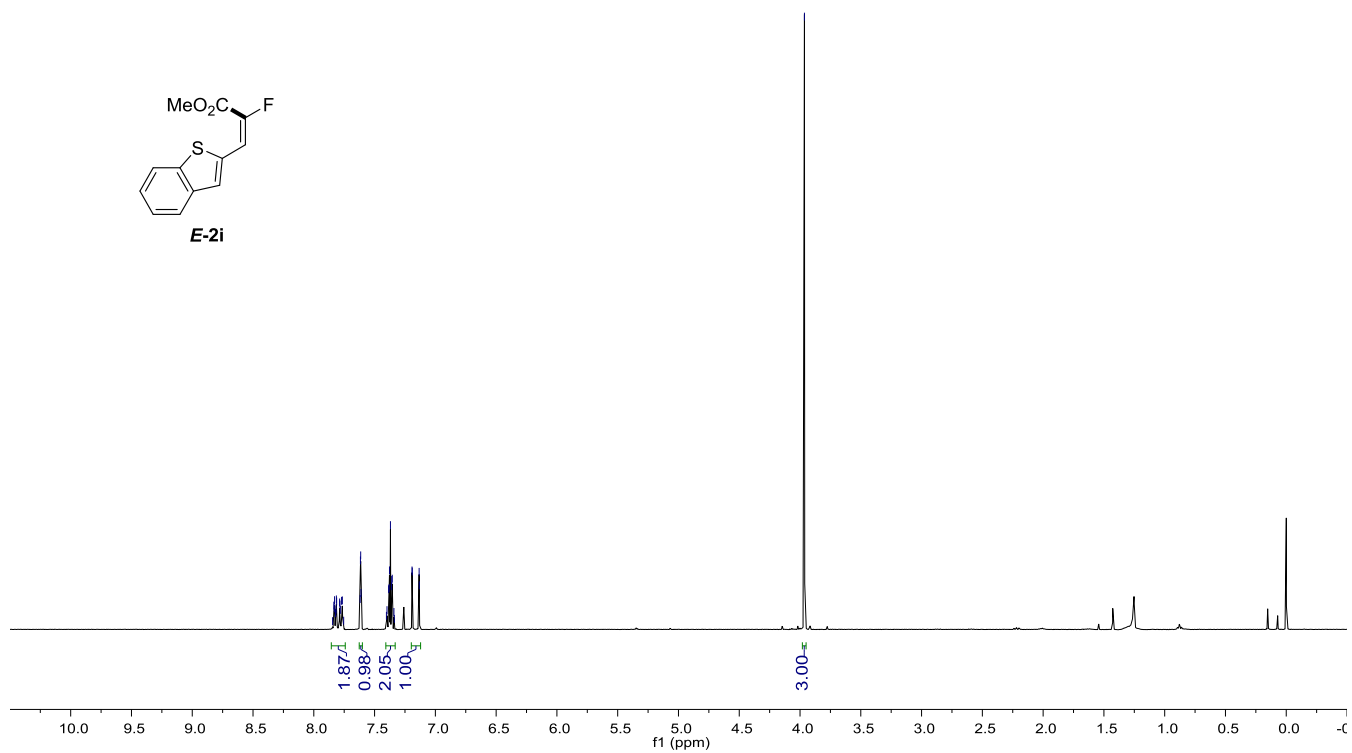

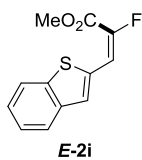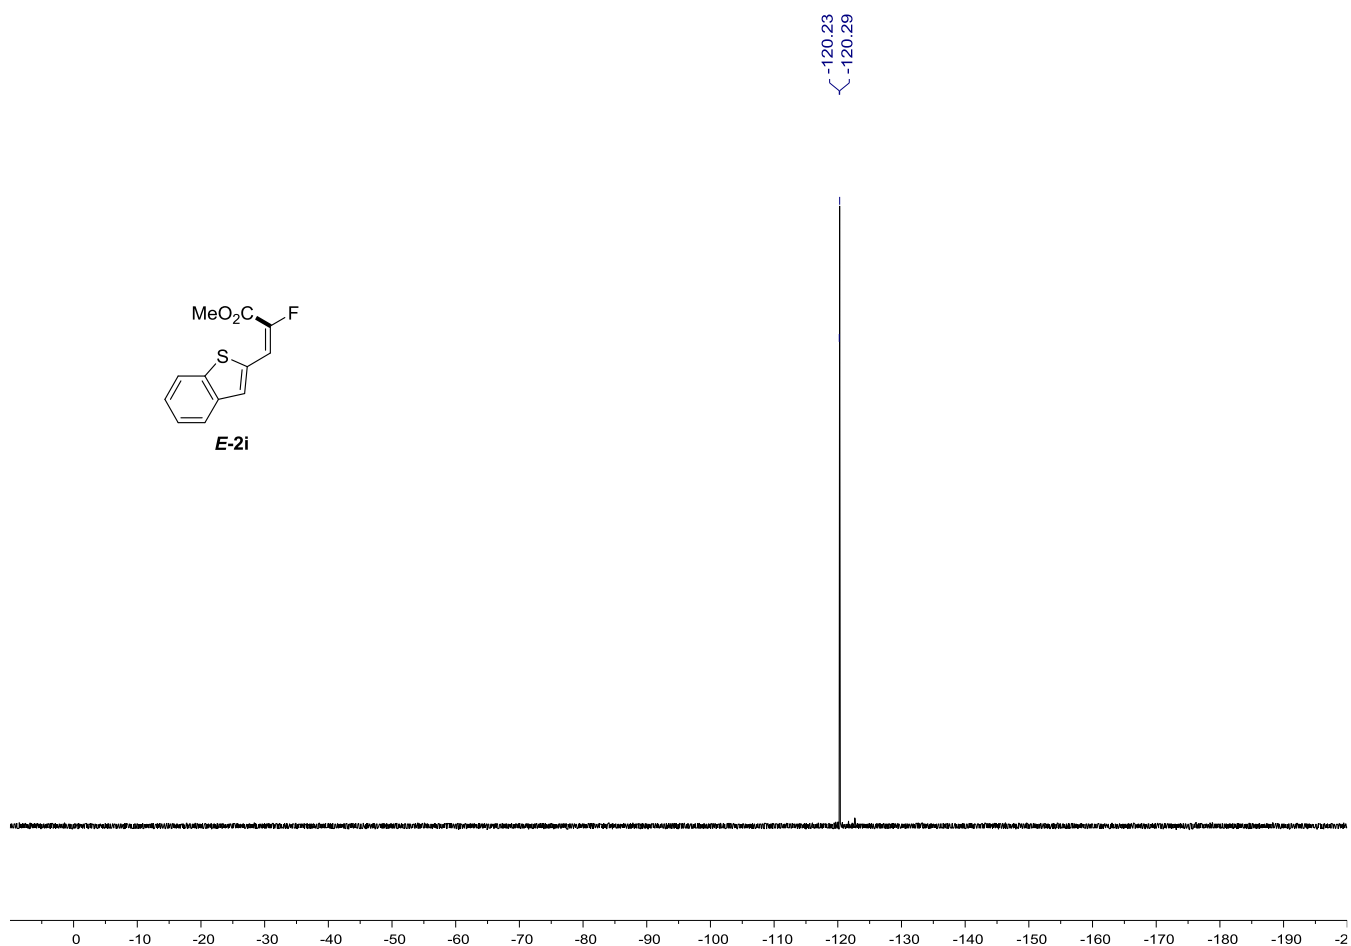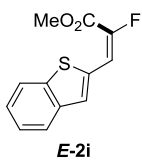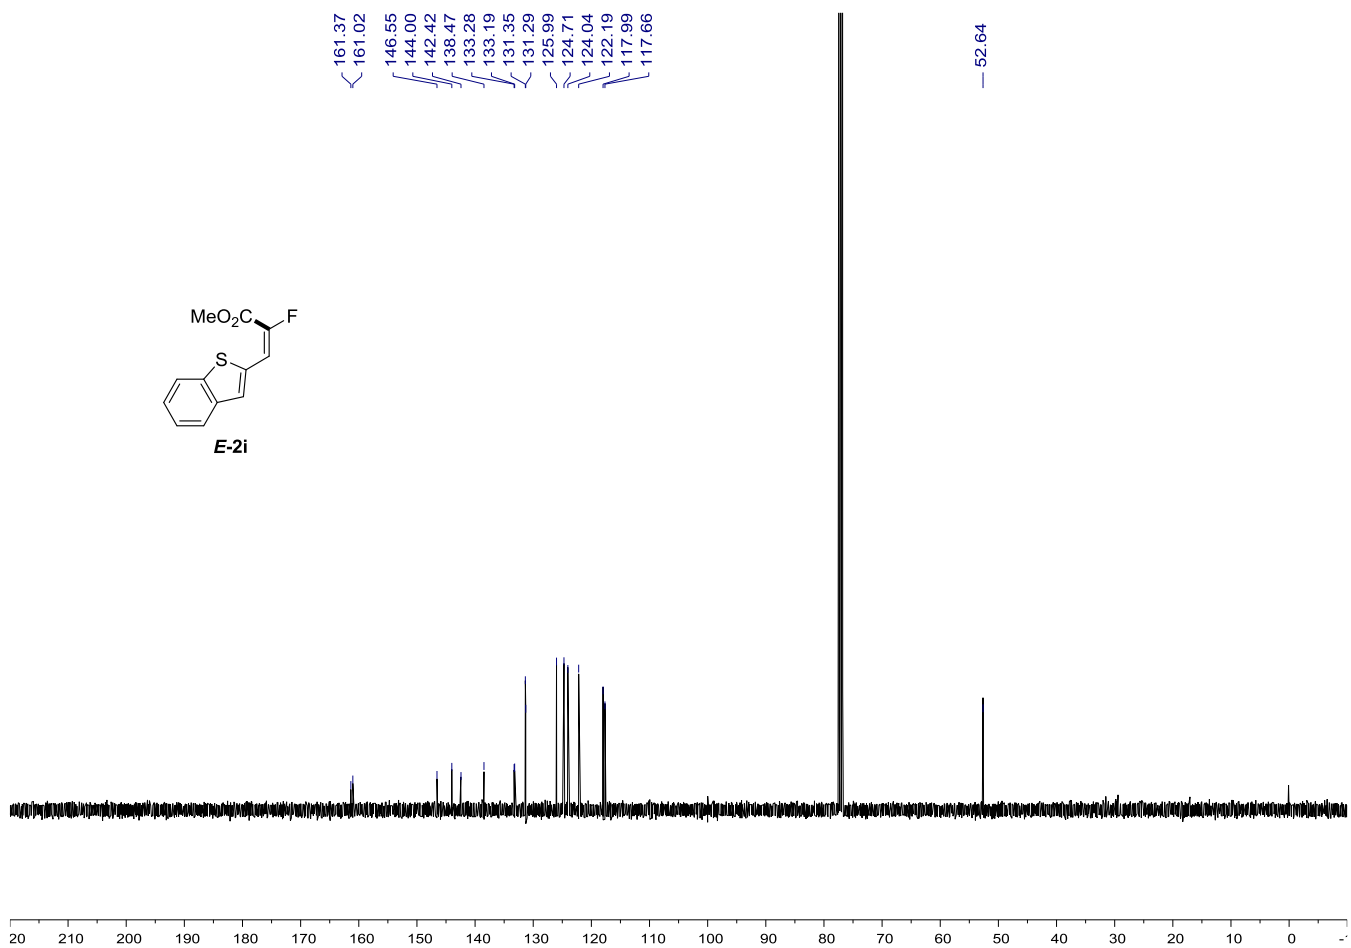

8.52  
7.71  
7.70  
7.58  
7.56  
7.50  
7.48  
7.11  
7.02  
6.59  
6.58

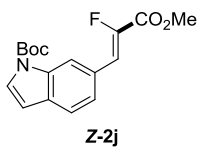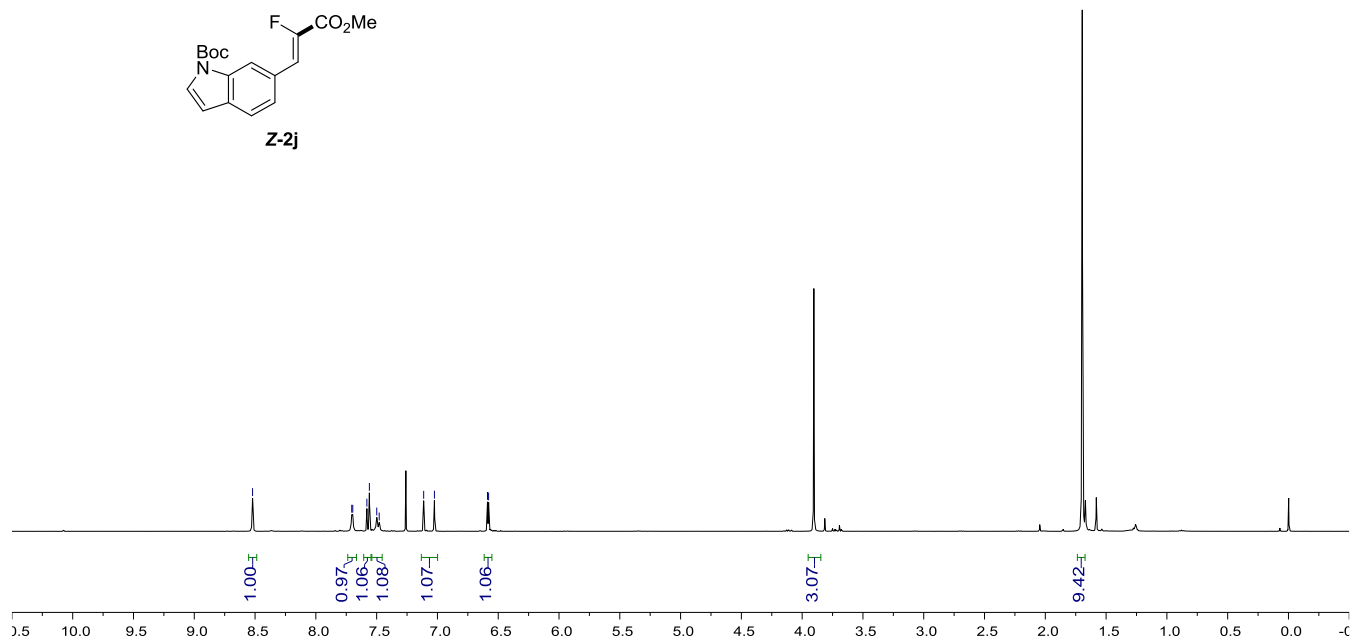

126.93  
127.02

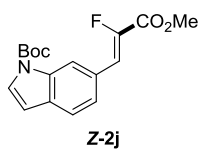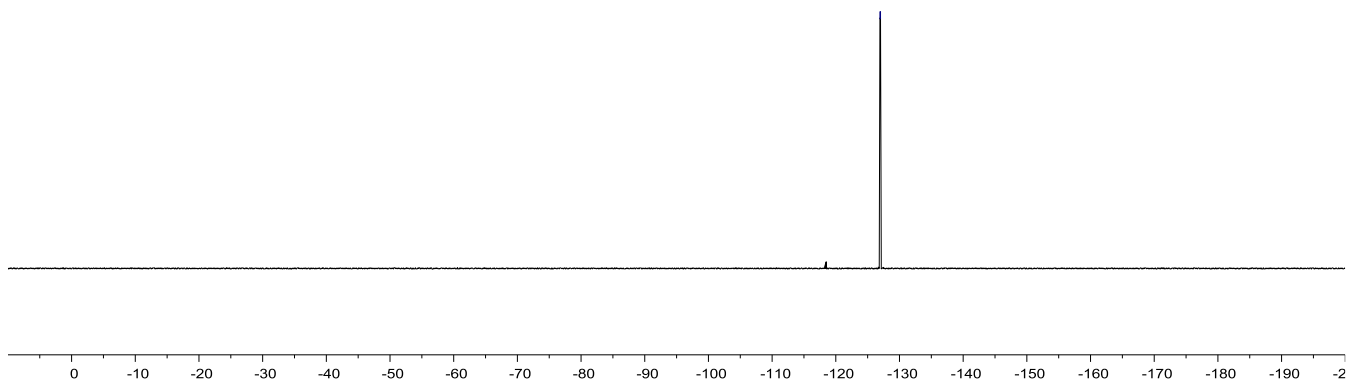



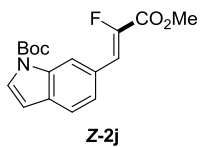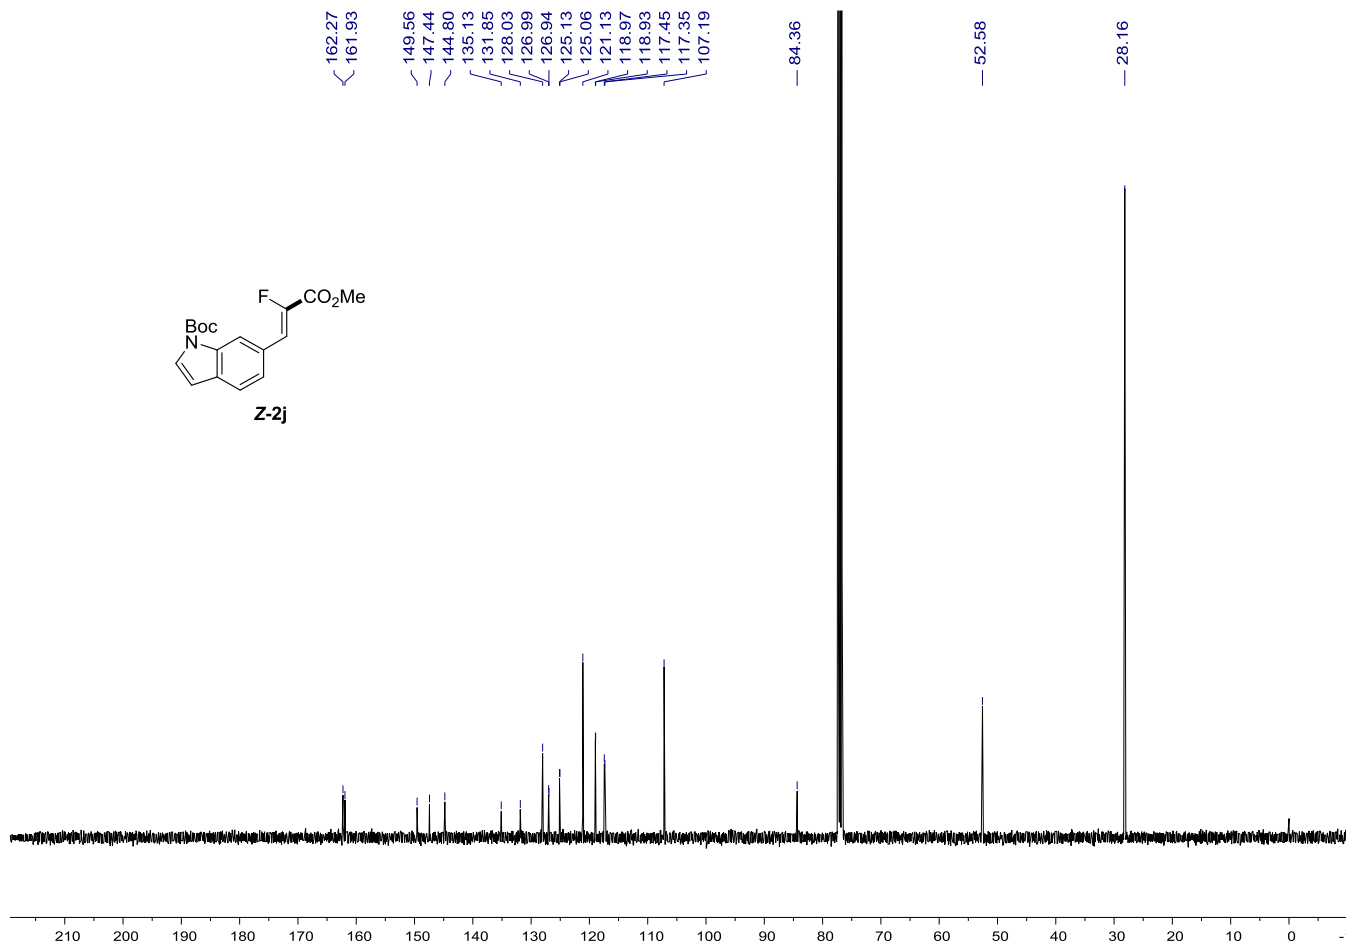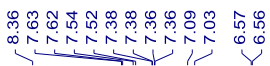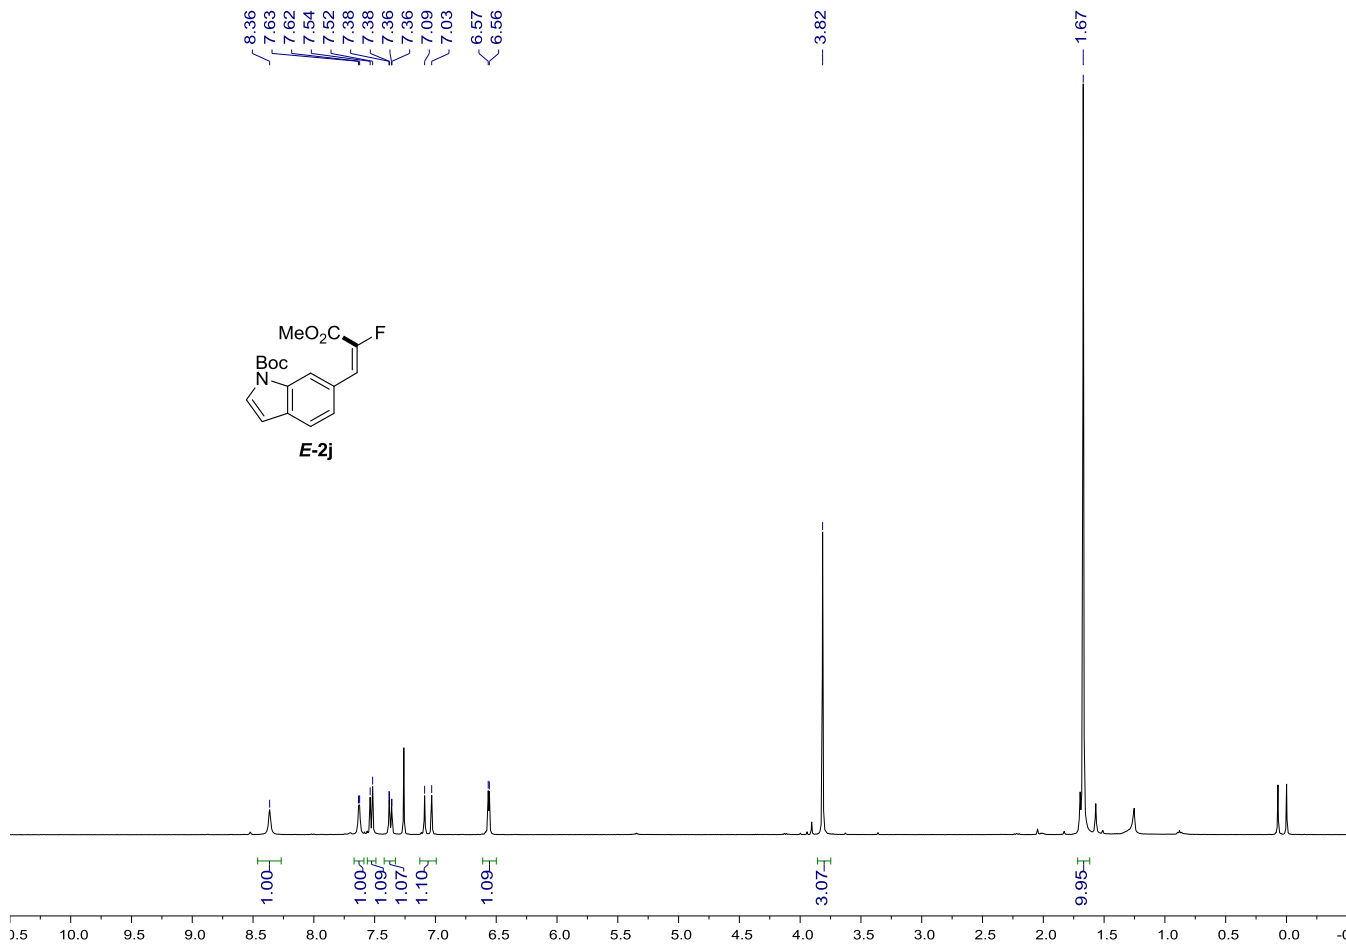

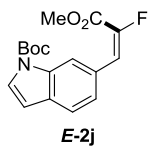

-118.44  
-118.51

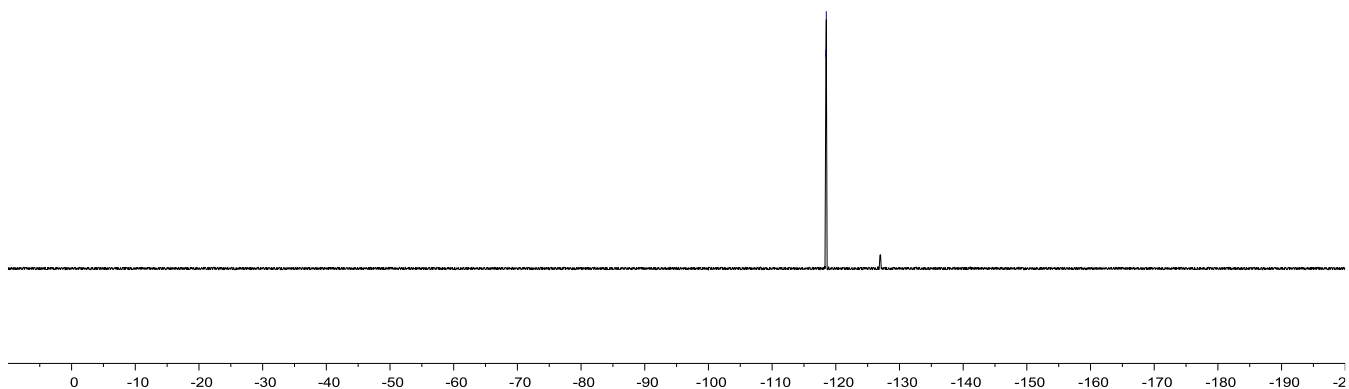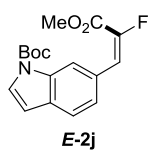

161.29  
 160.94  
 149.55  
 147.41  
 144.89  
 134.92  
 131.08  
 127.31  
 126.65  
 126.56  
 124.58  
 124.55  
 123.24  
 122.98  
 120.44  
 116.83  
 116.80  
 107.20

84.01

52.25

28.19

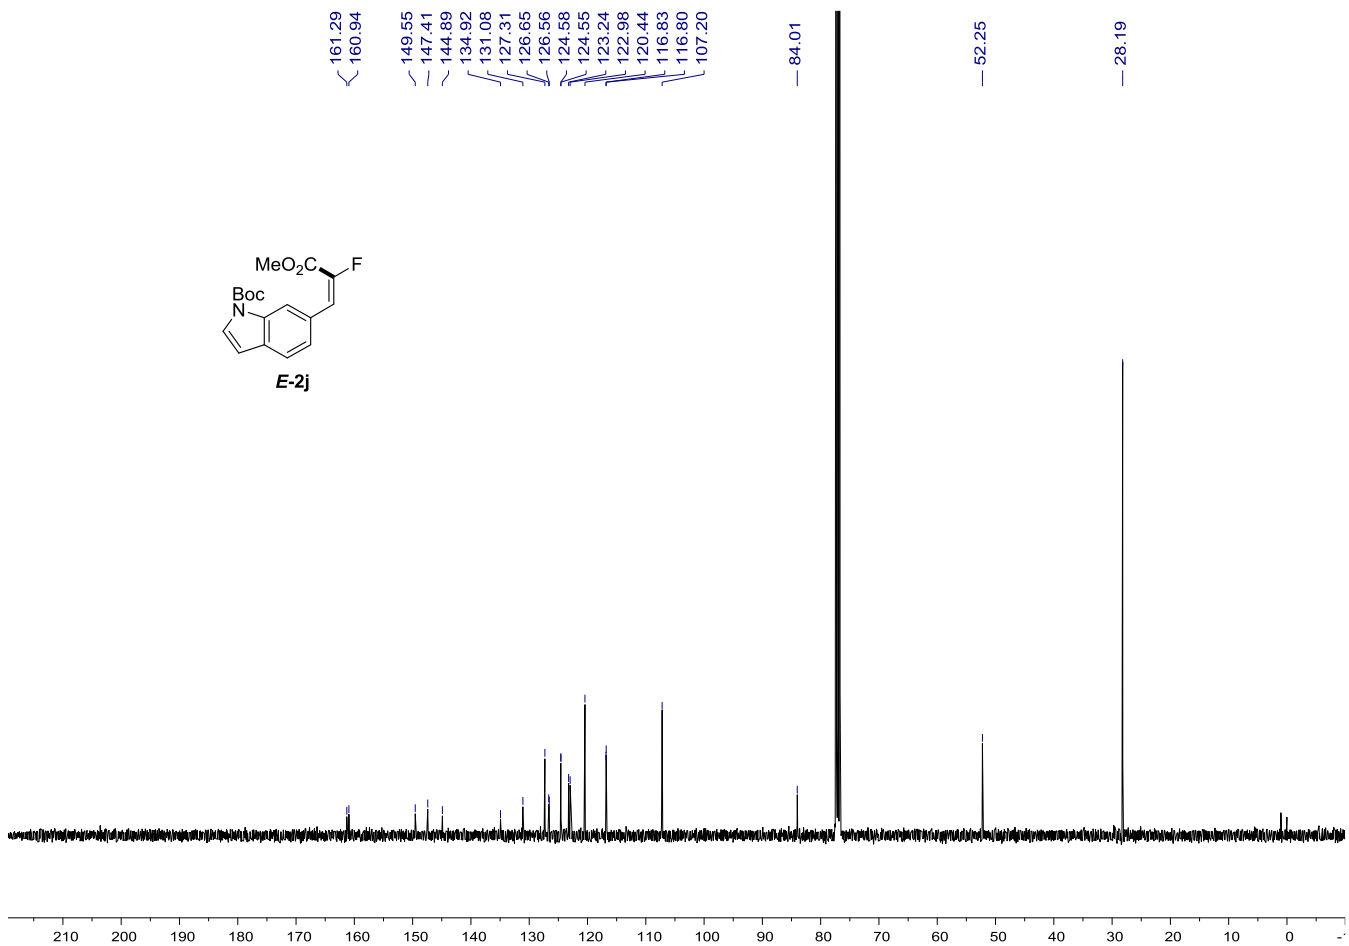

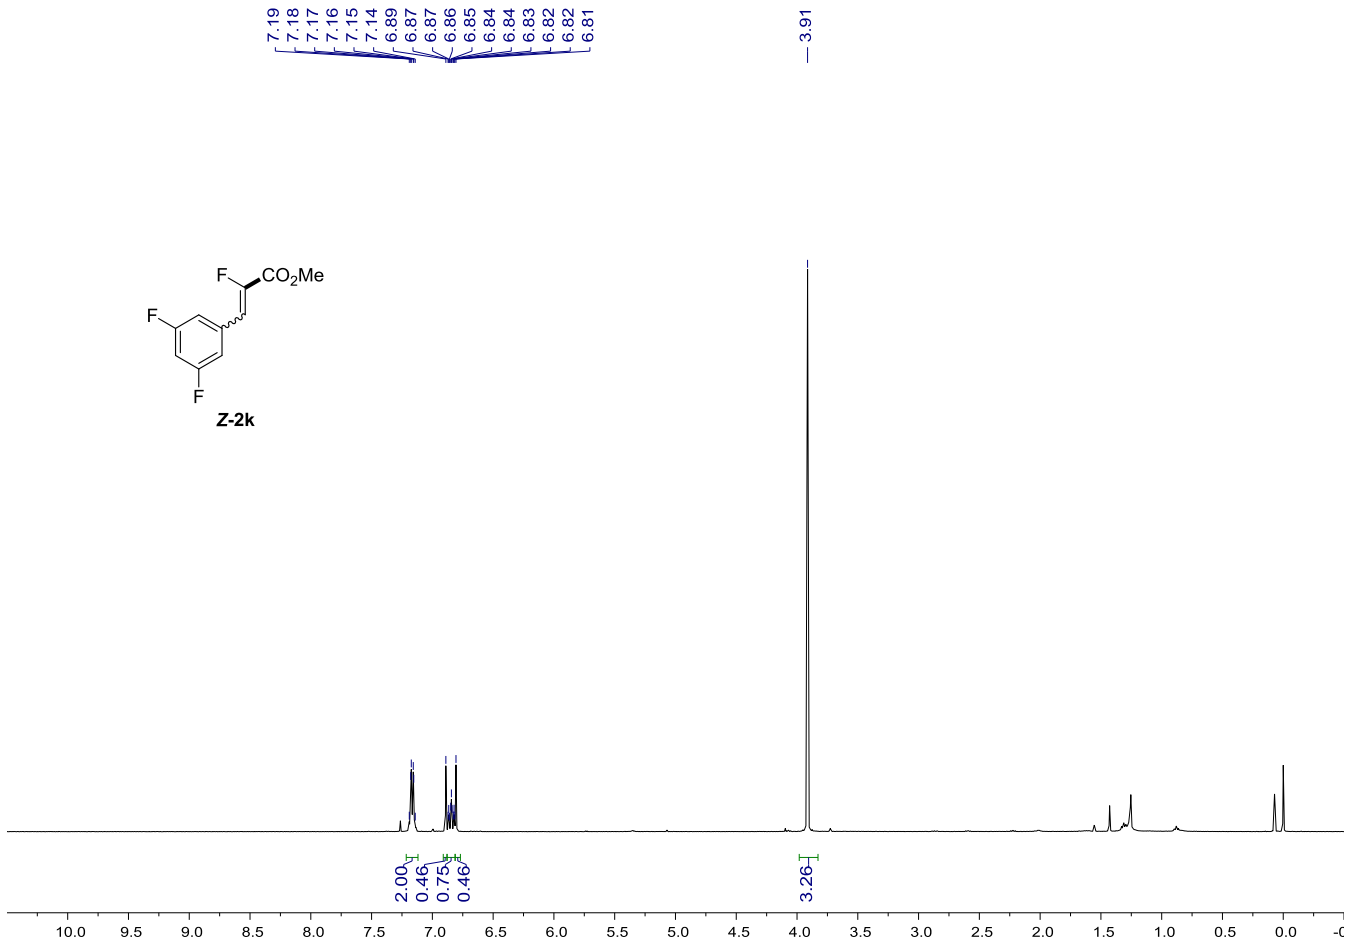

Chemical shift values (ppm): -108.99, -109.01, -109.03, -121.46, -121.55

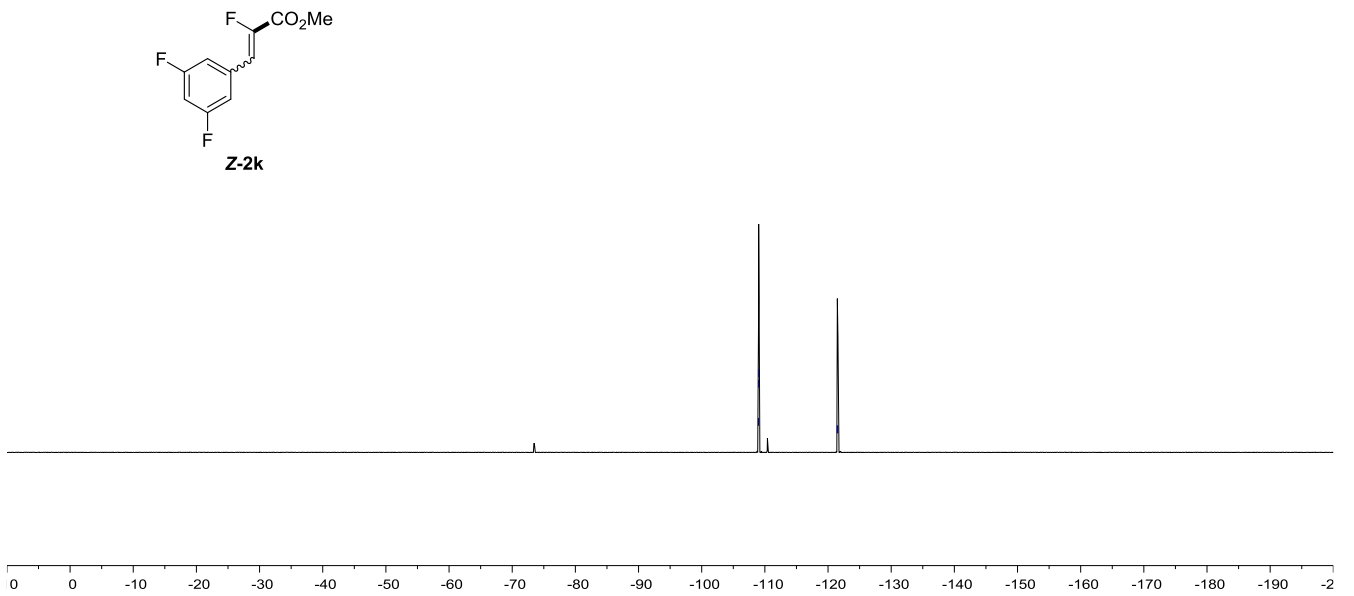

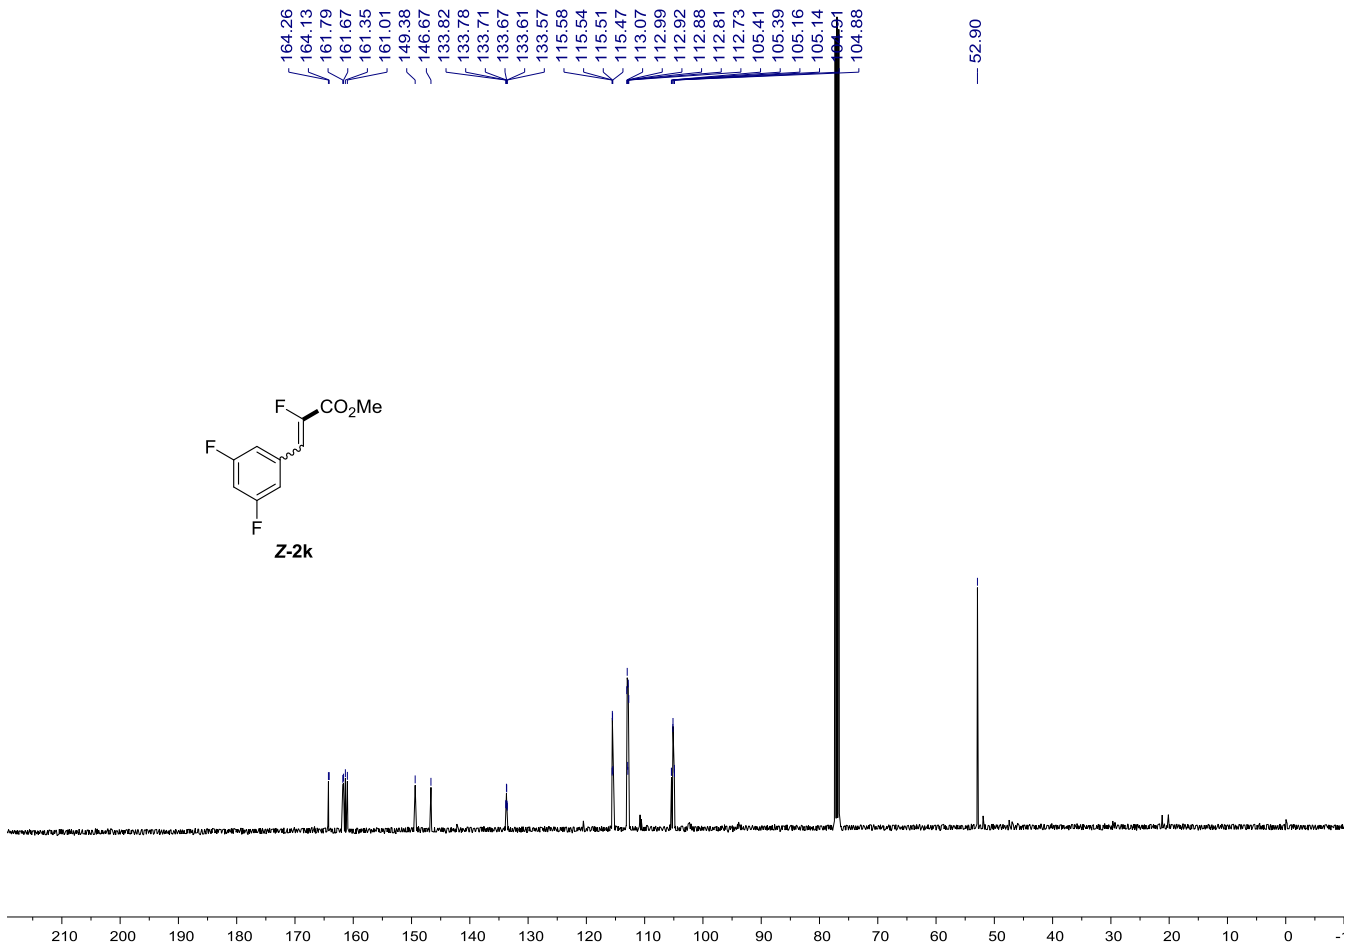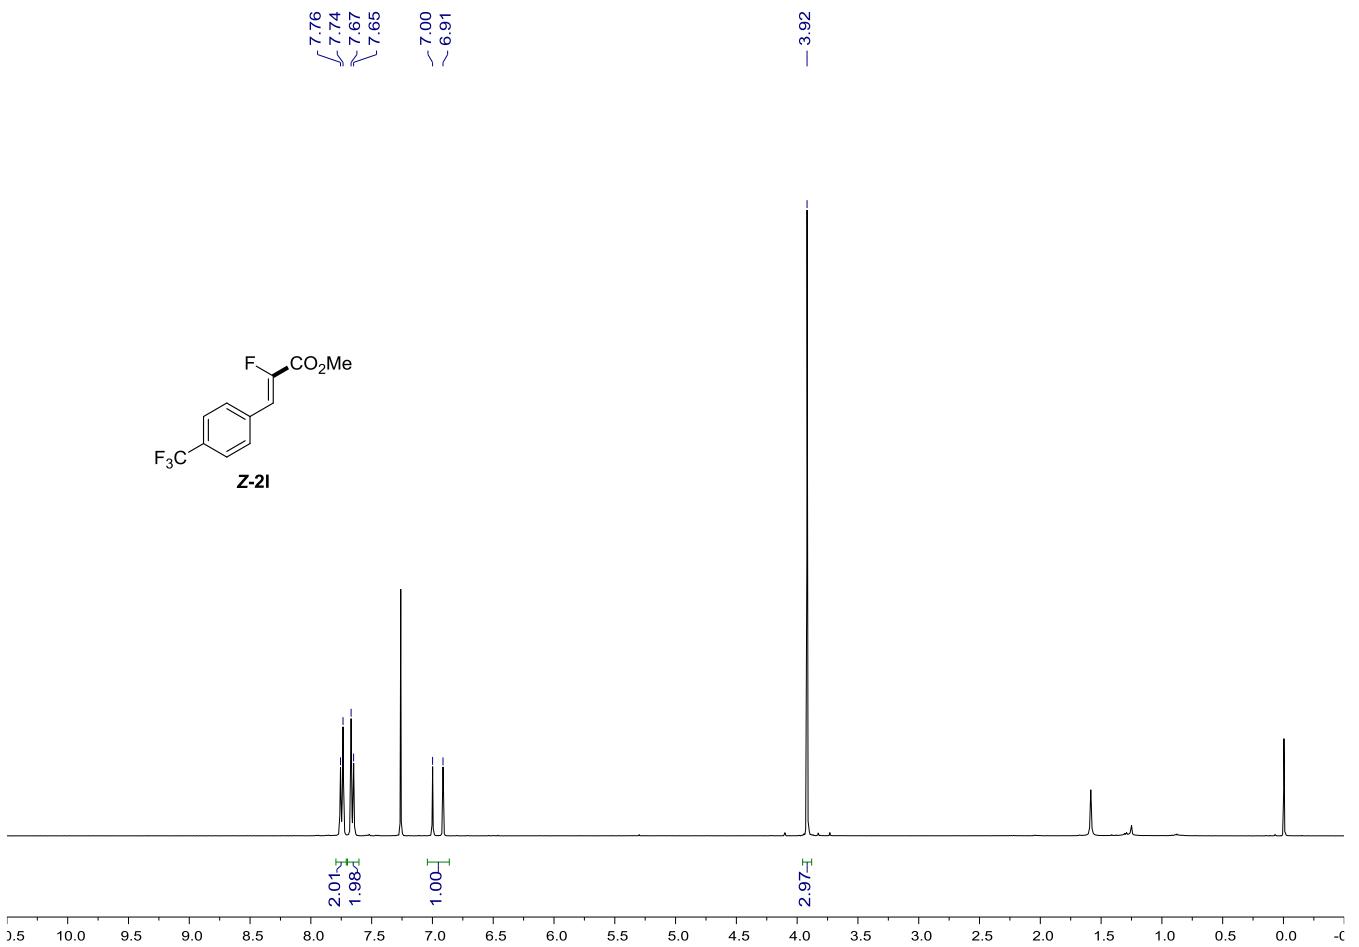

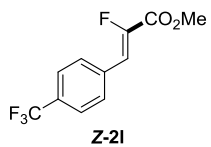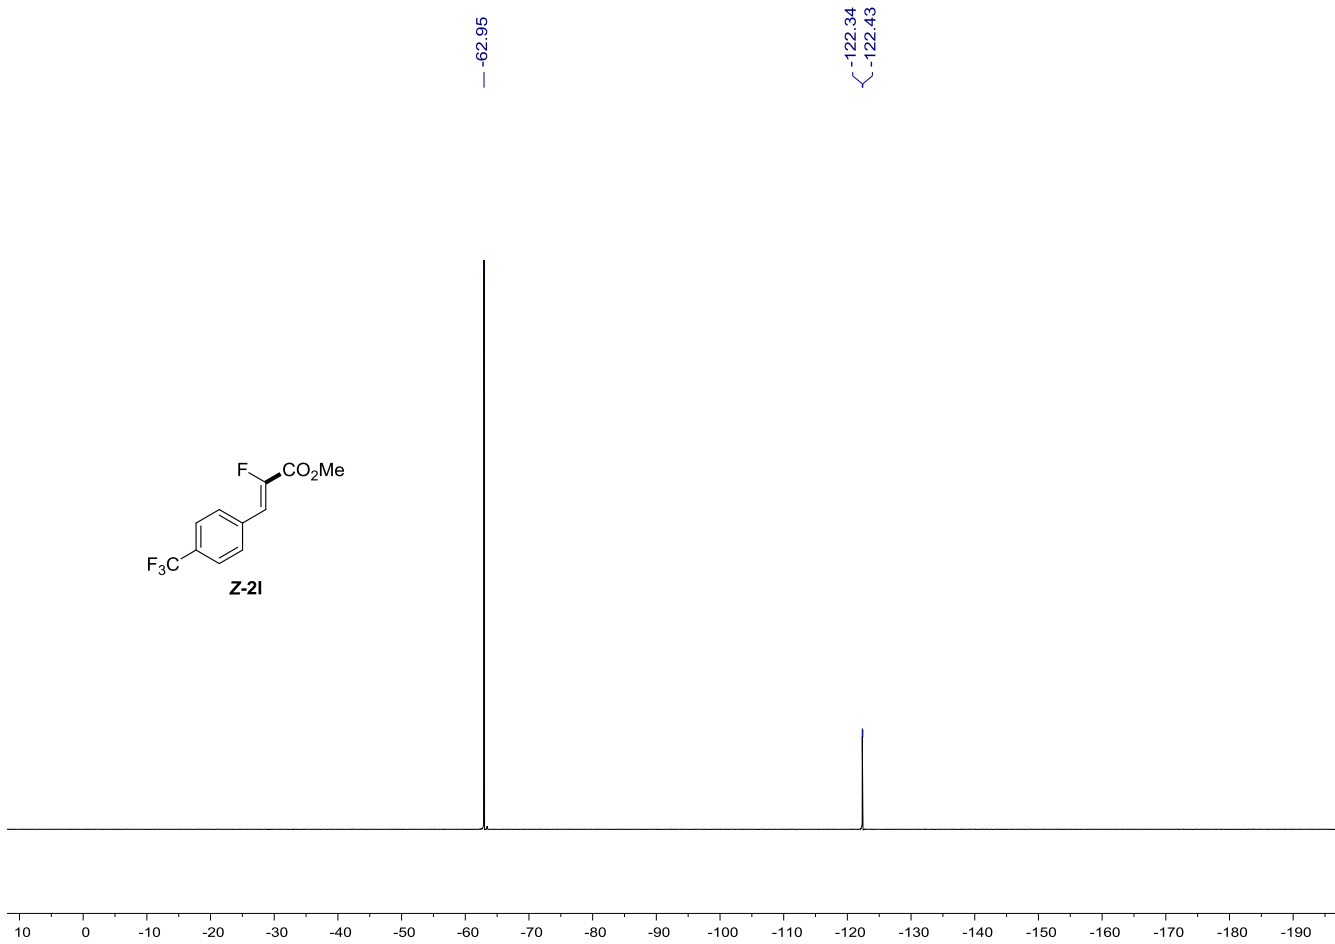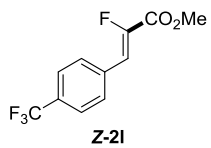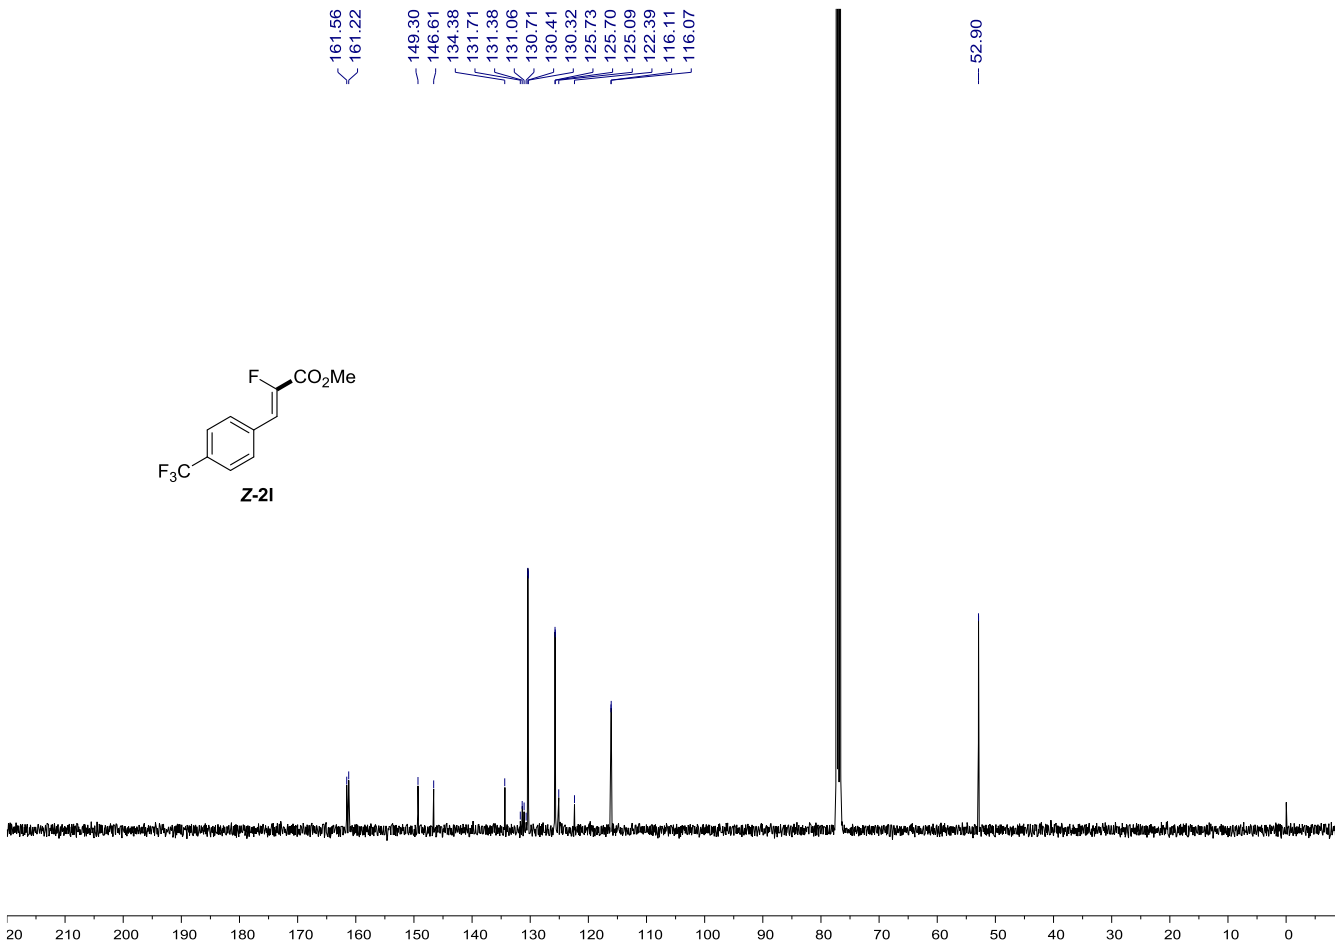

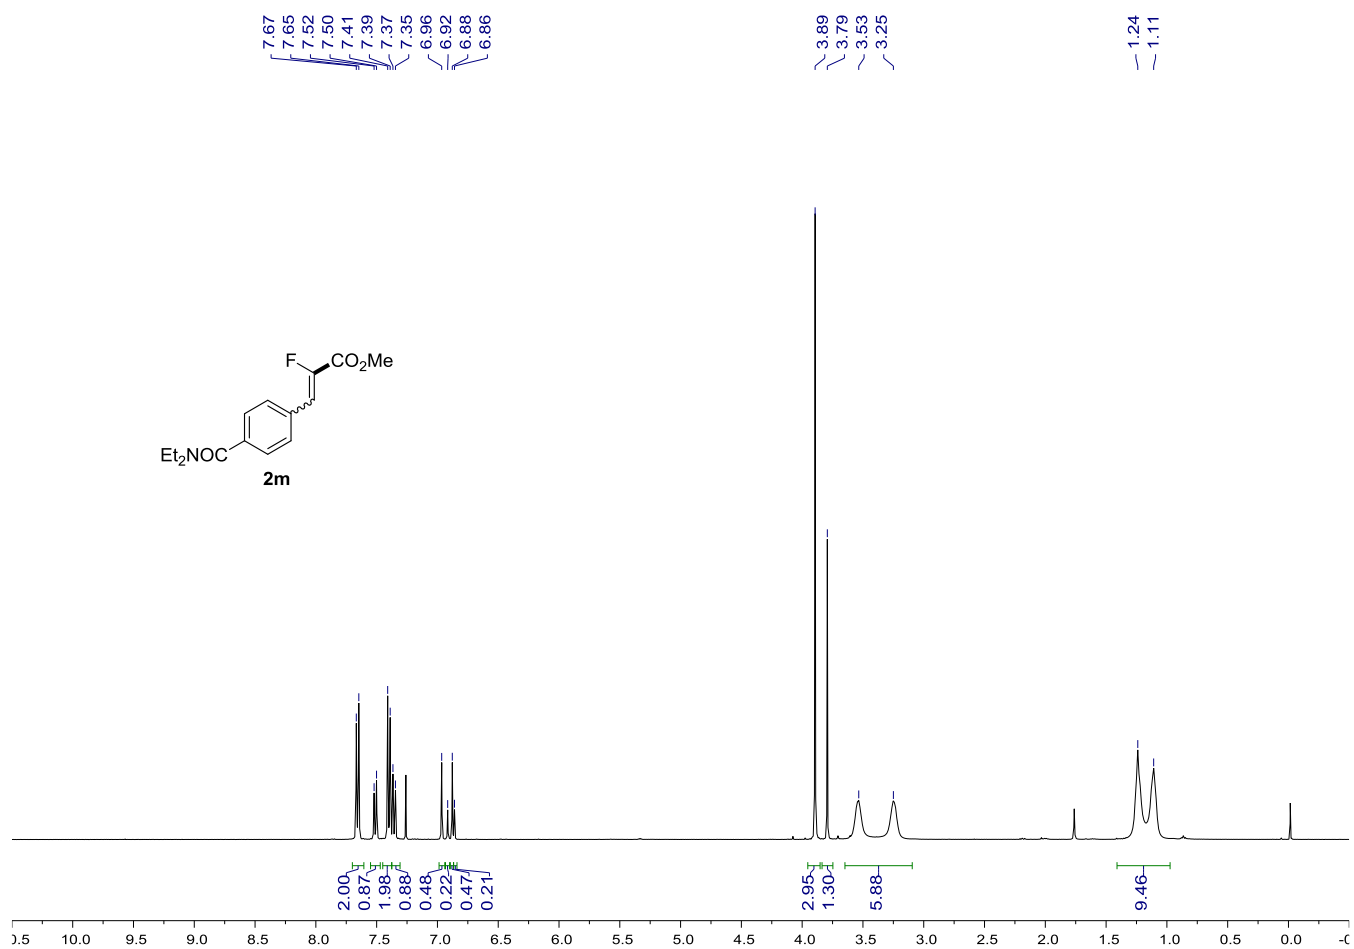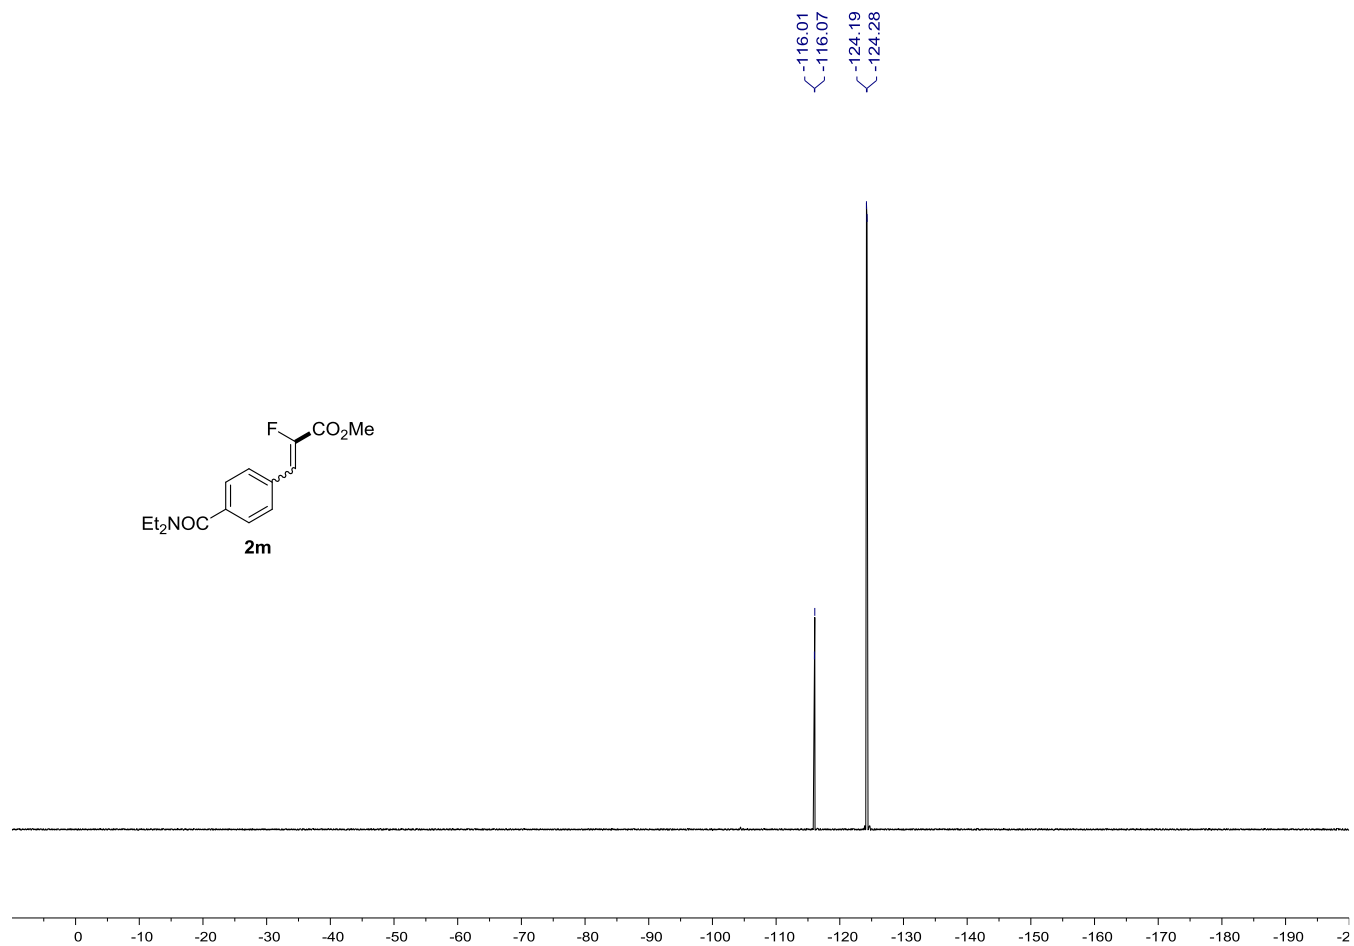

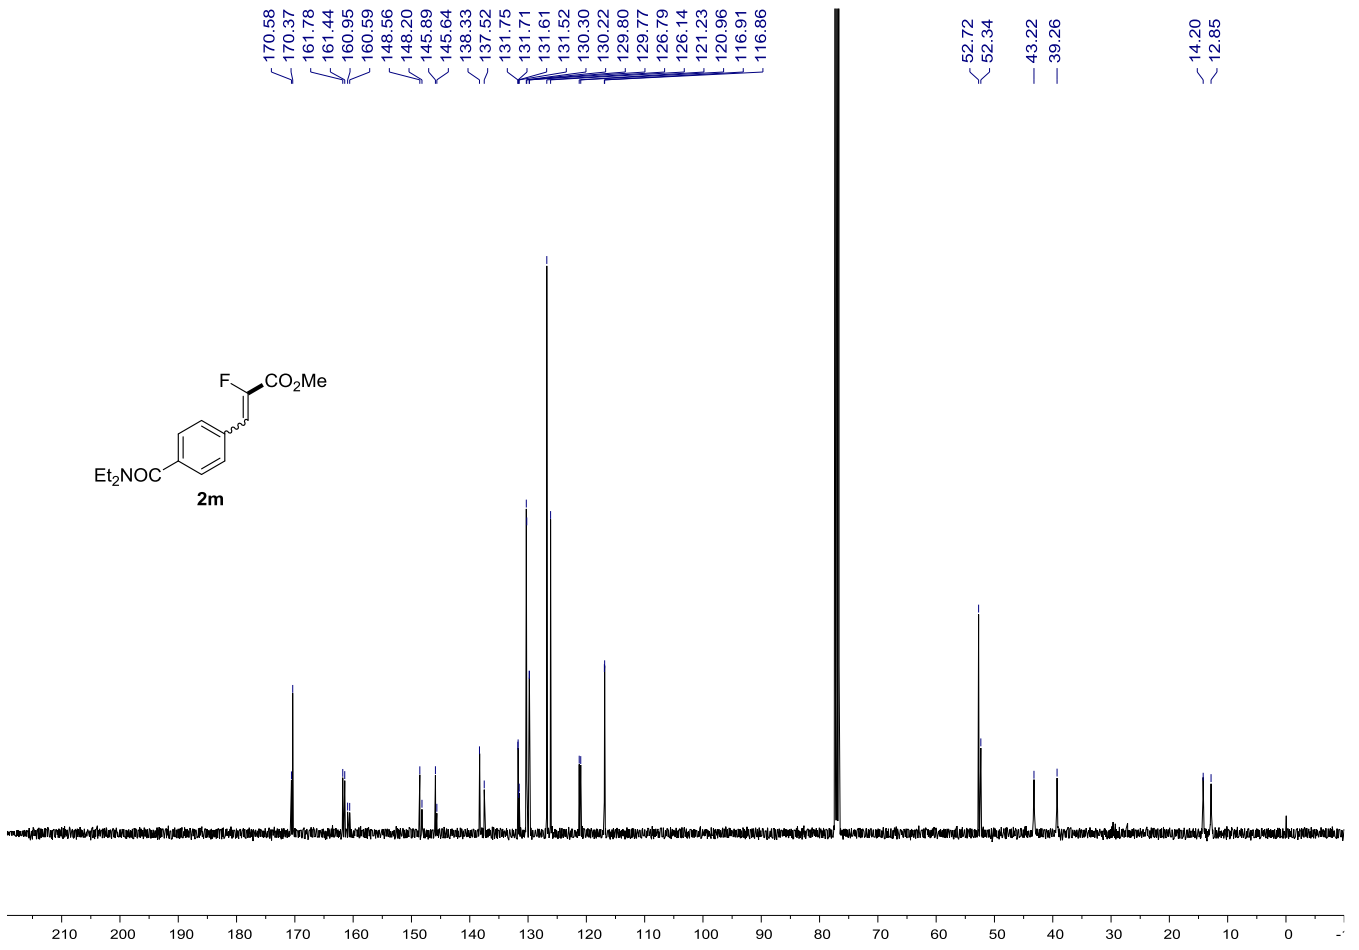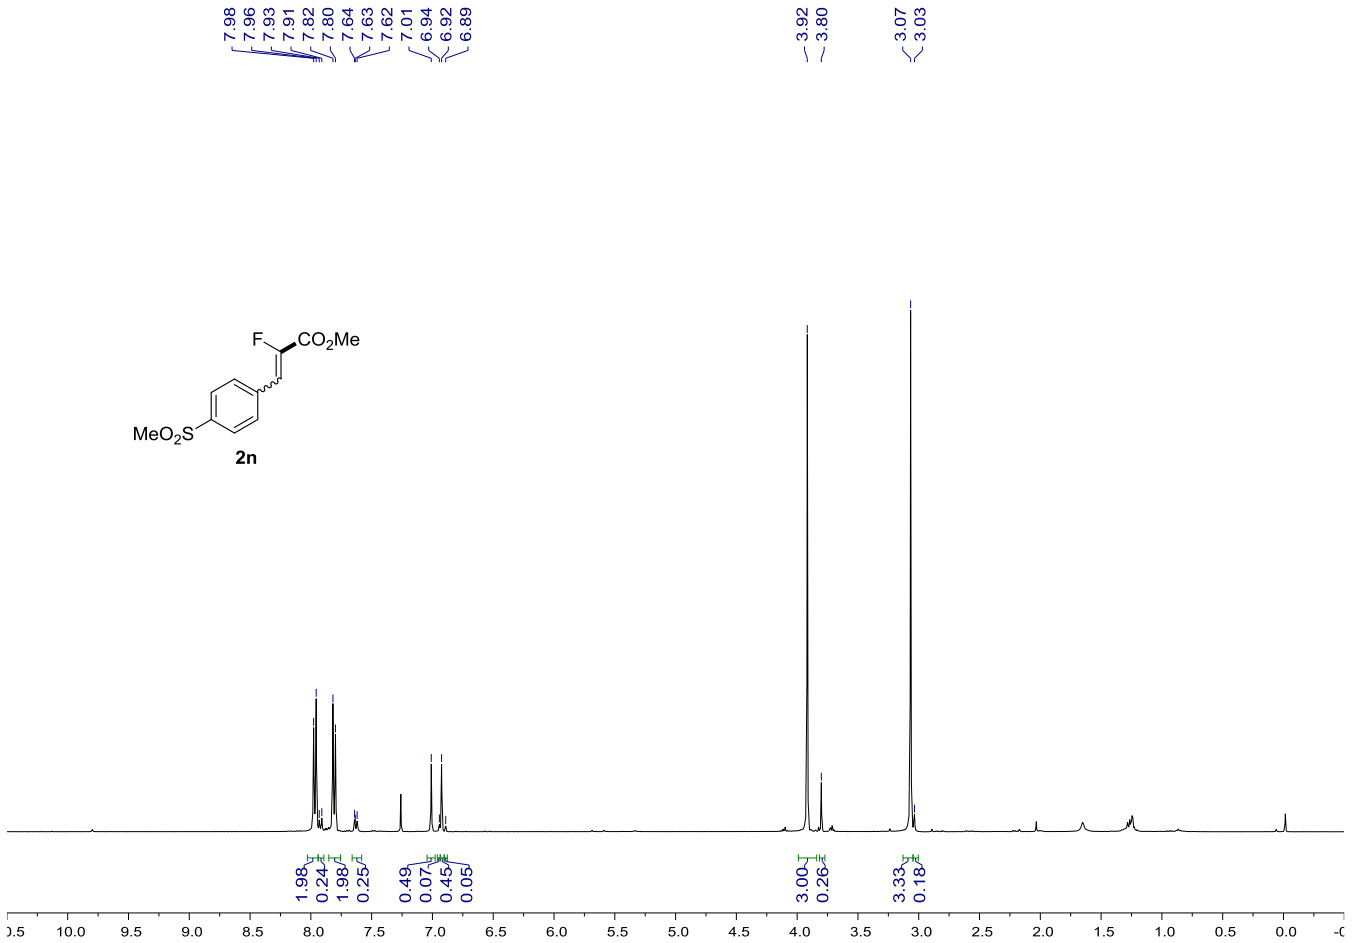

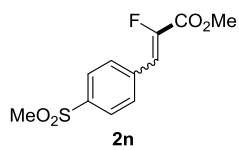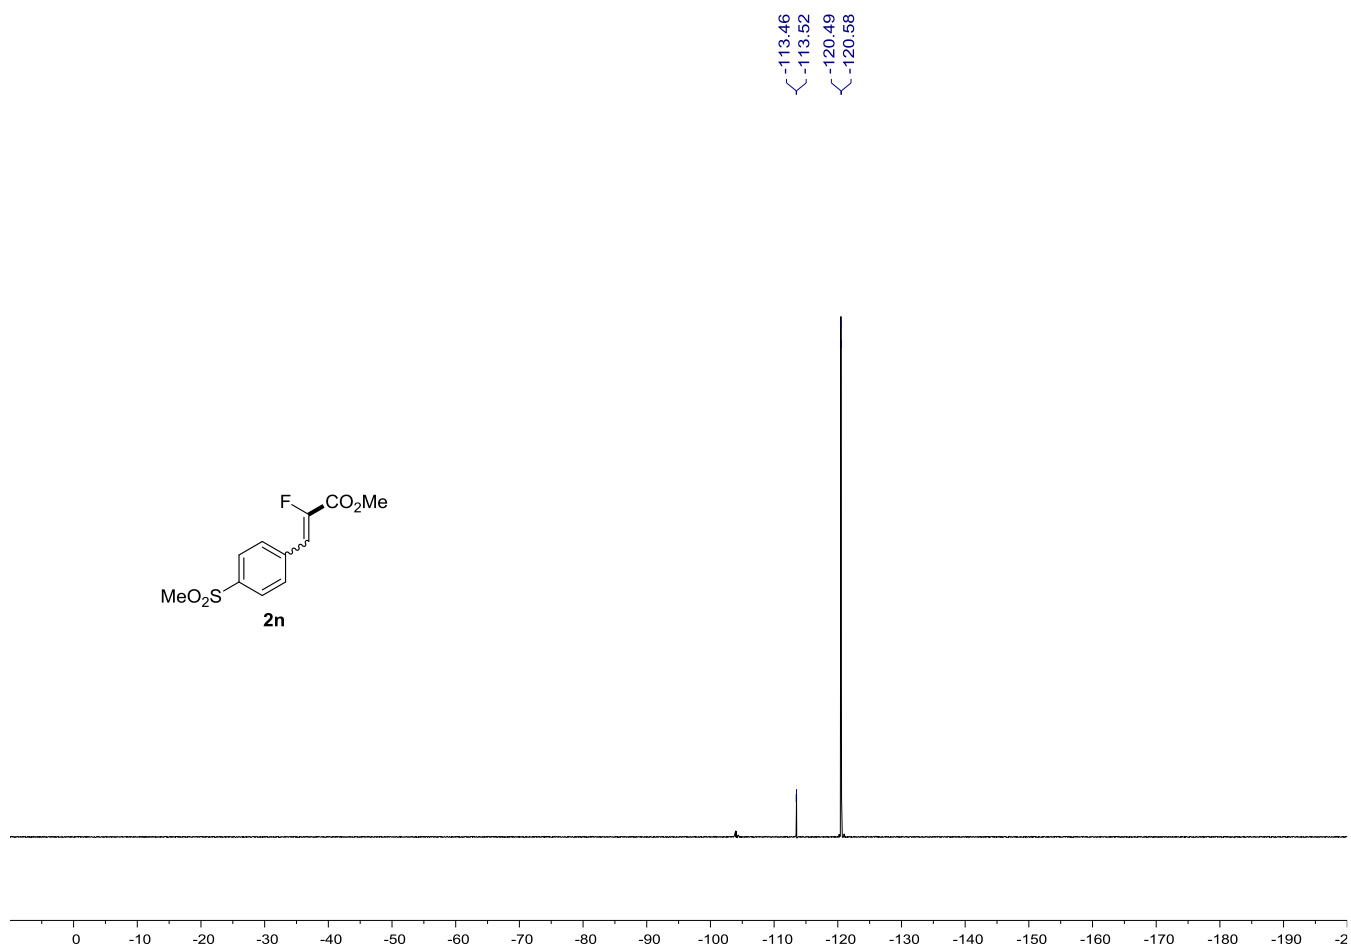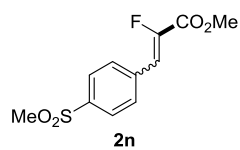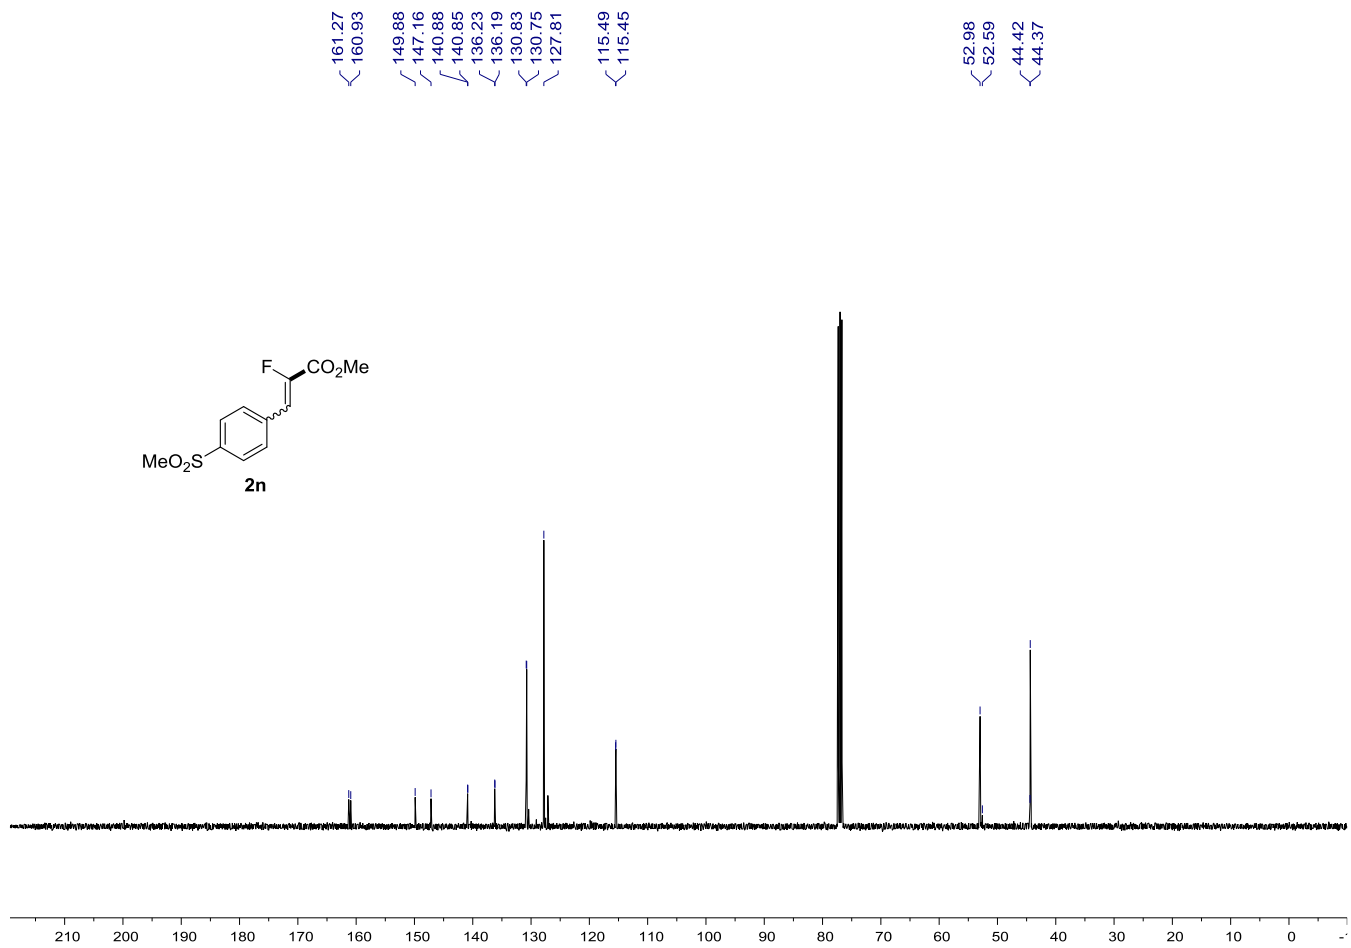



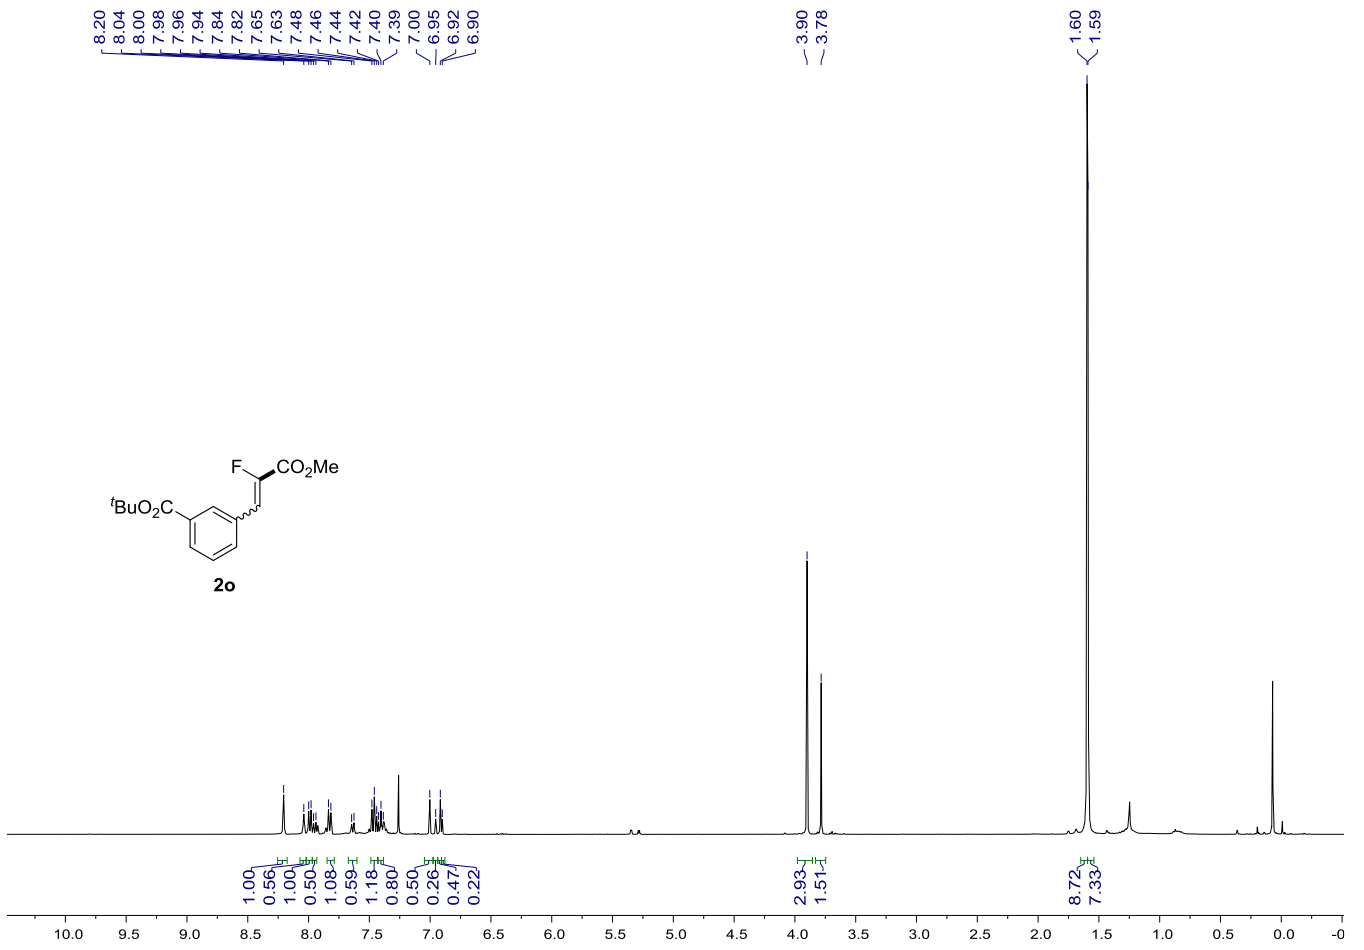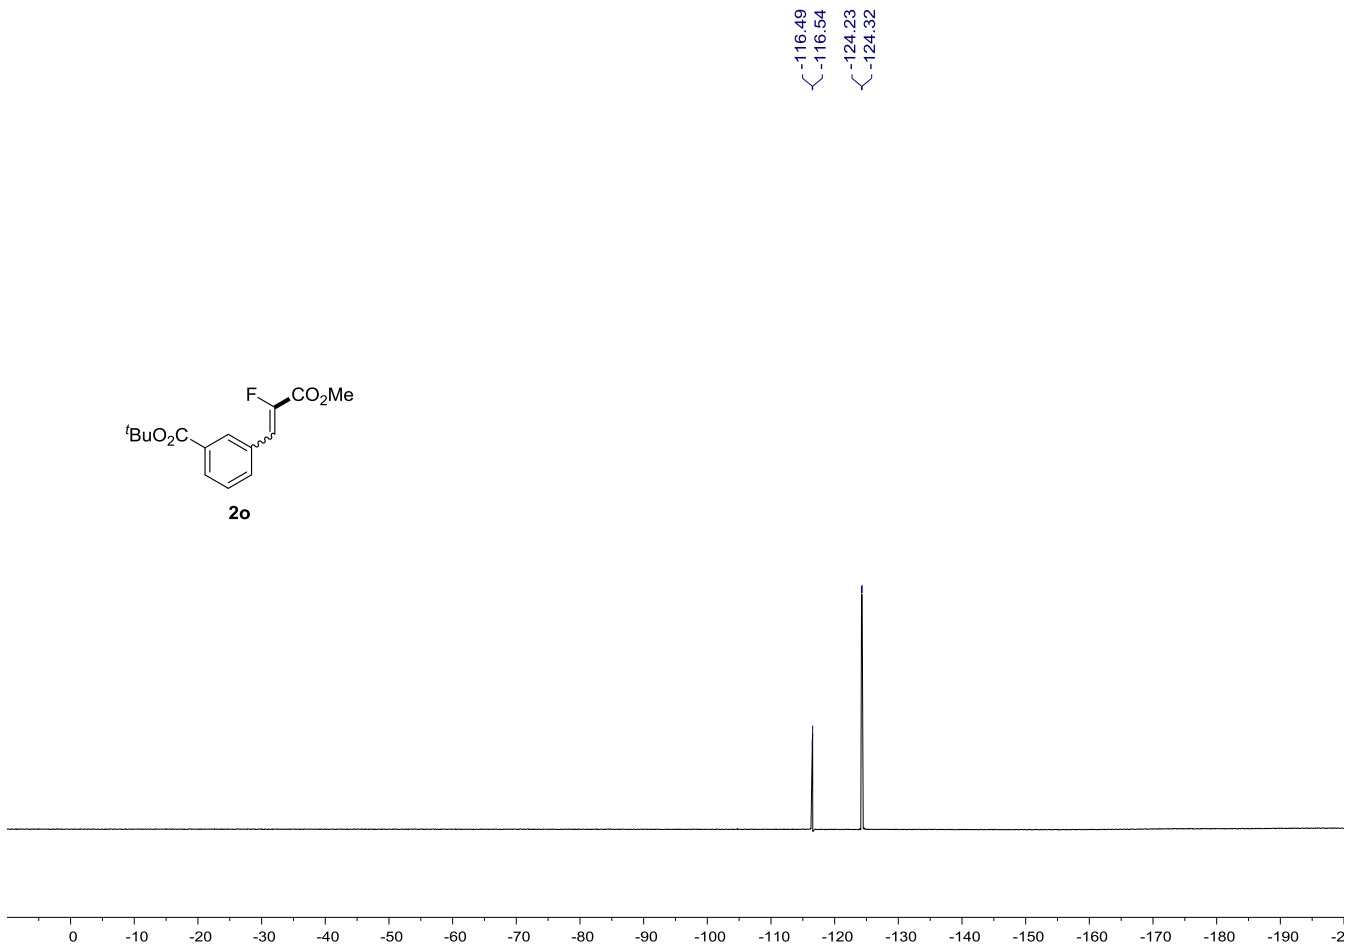

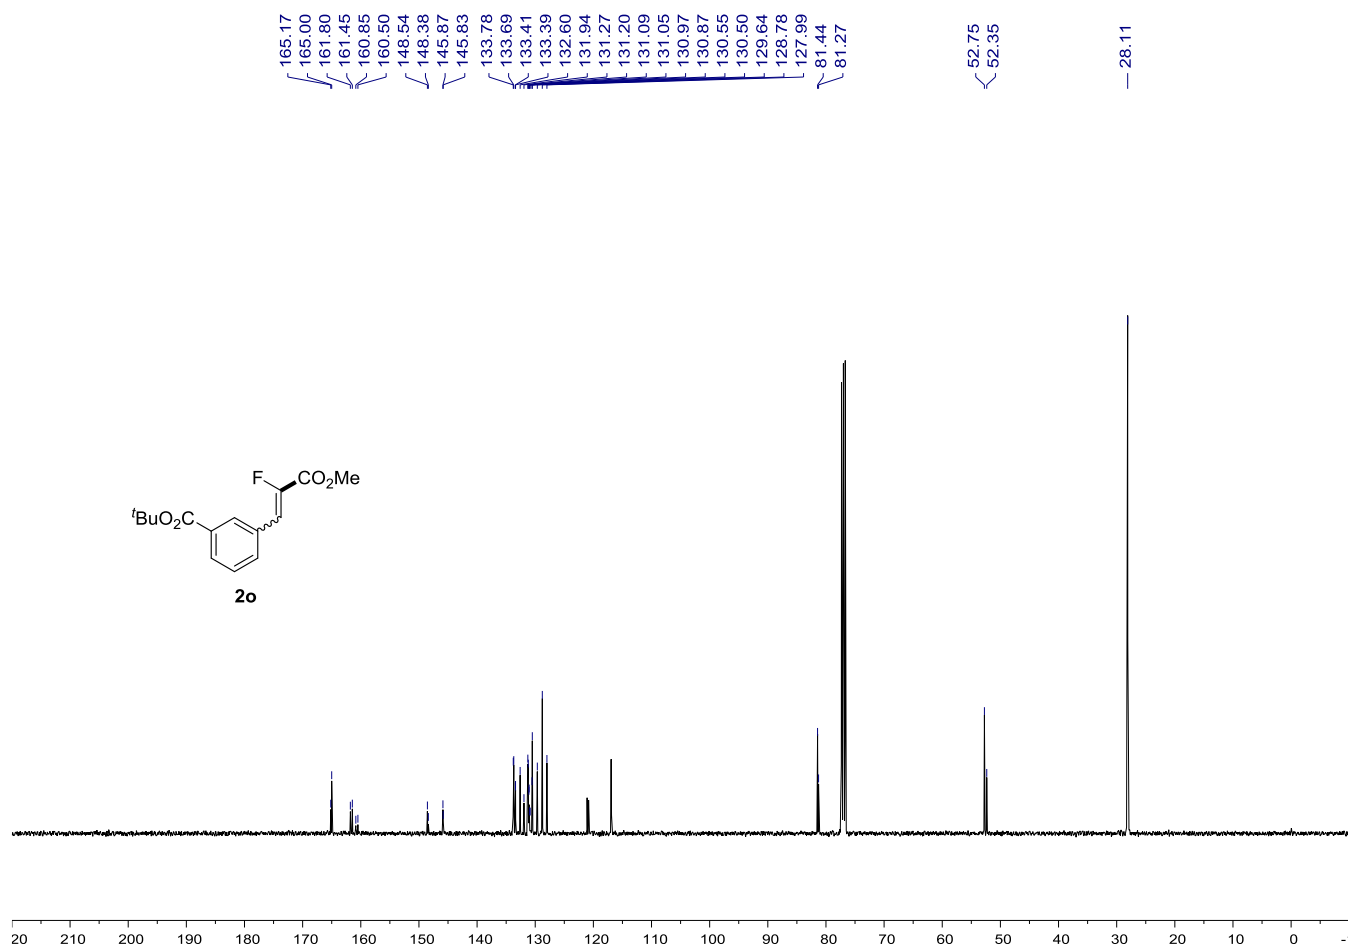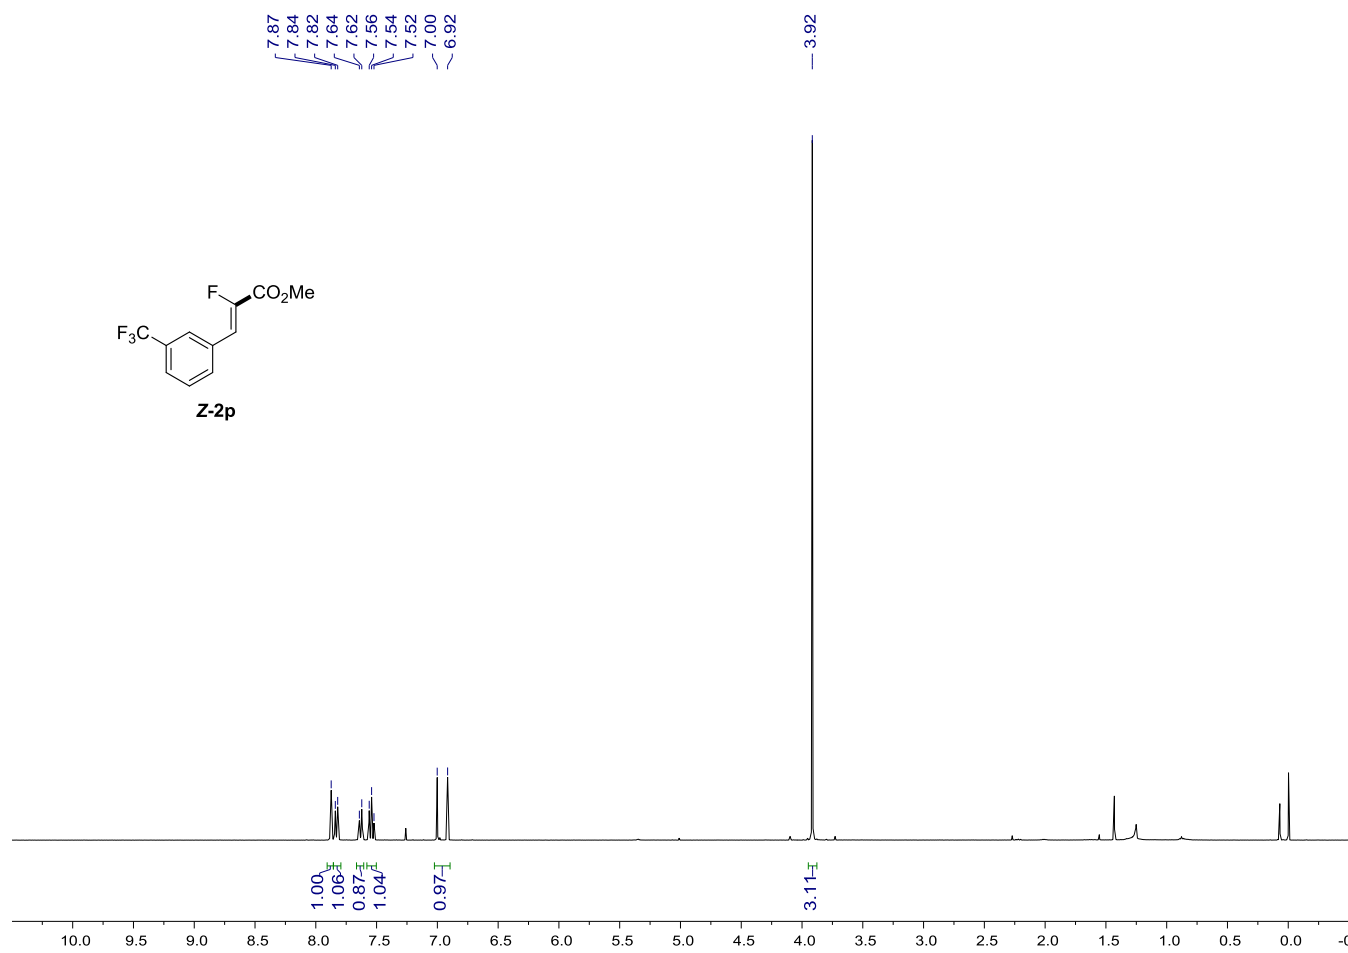

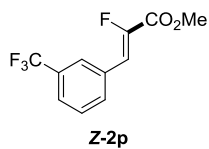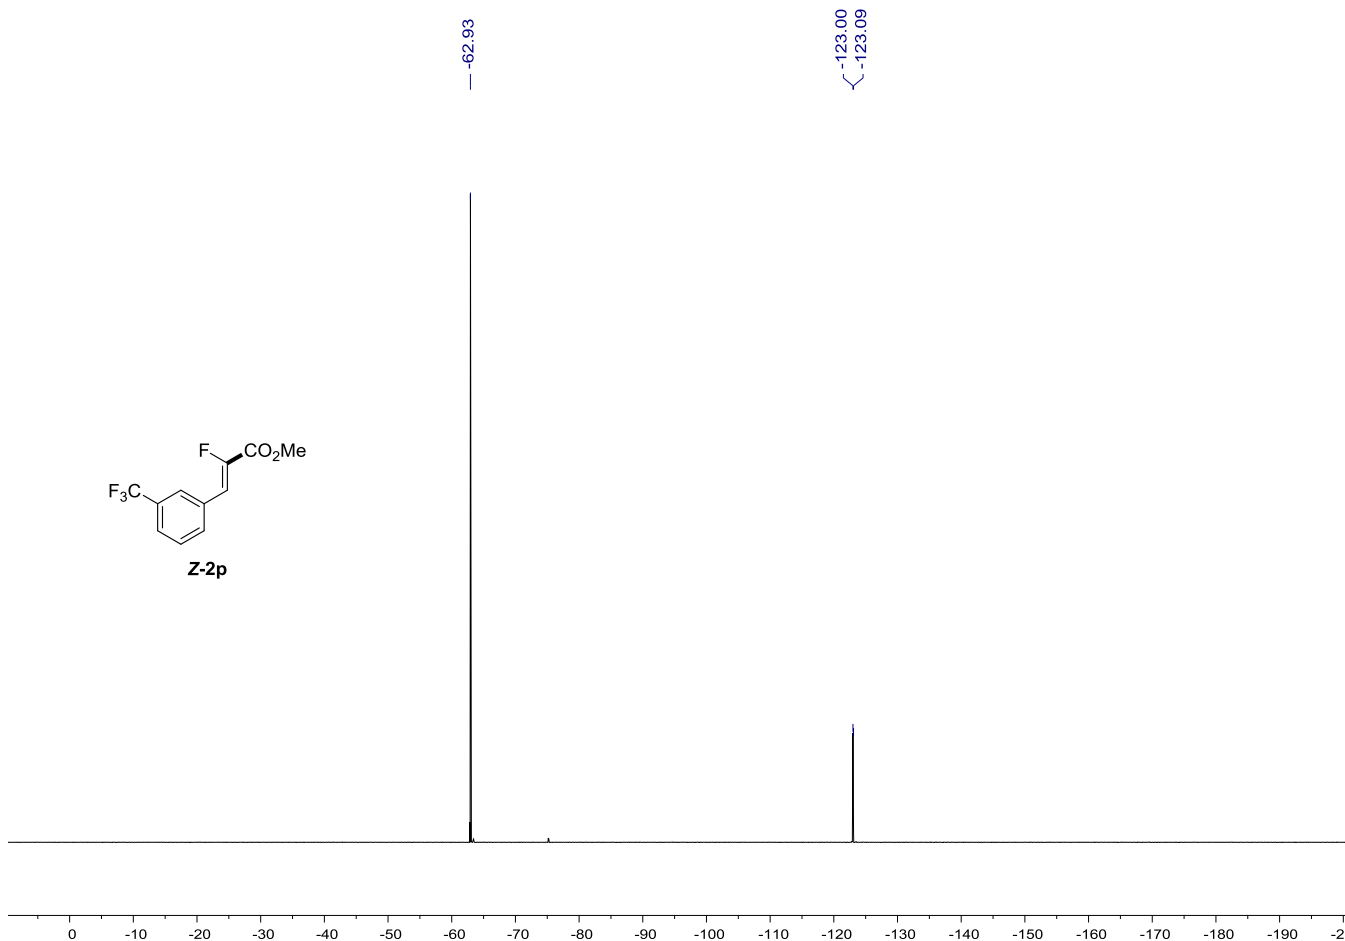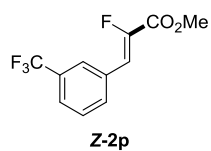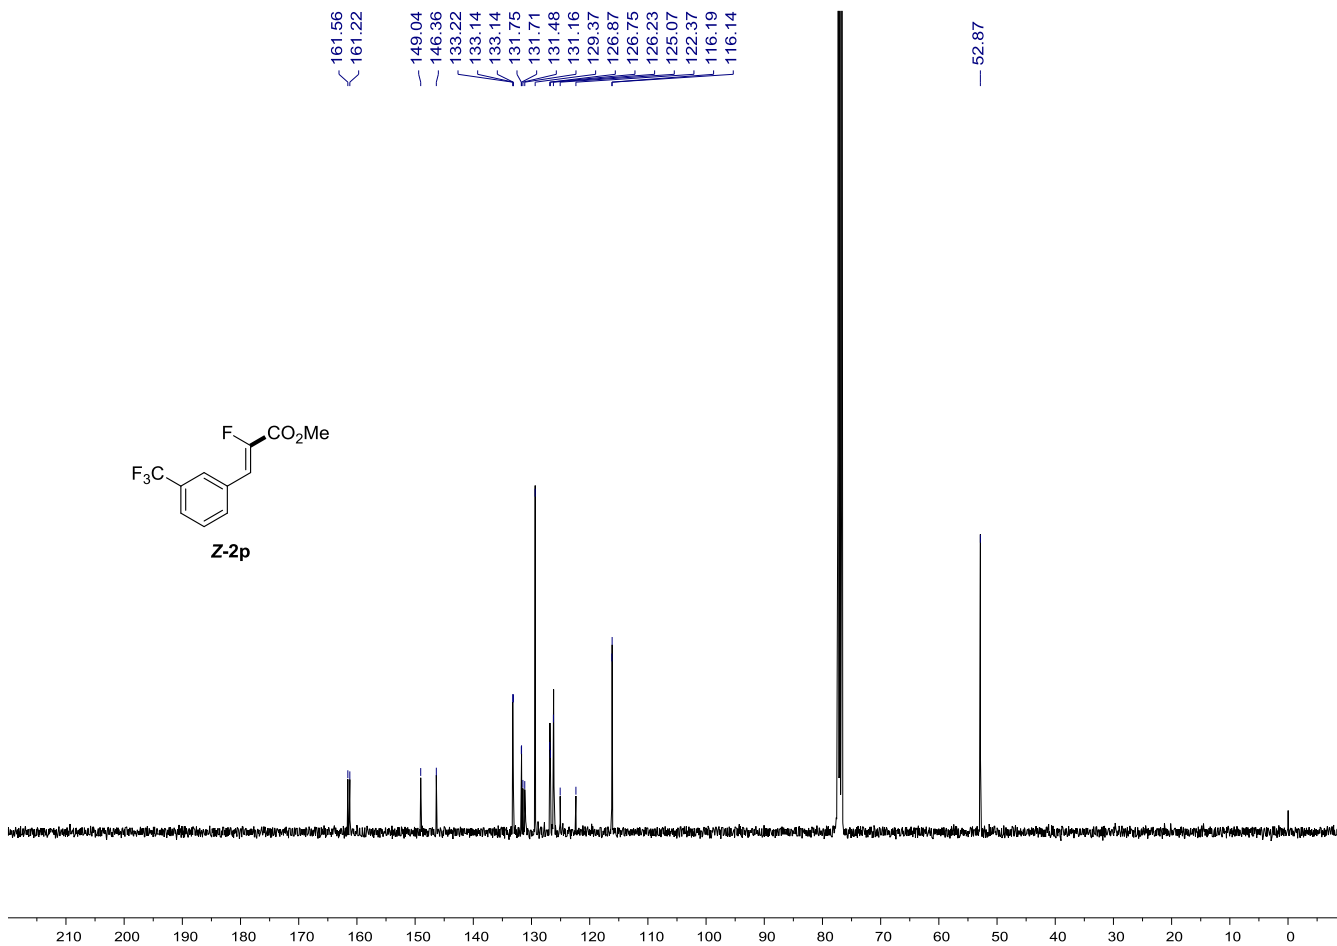

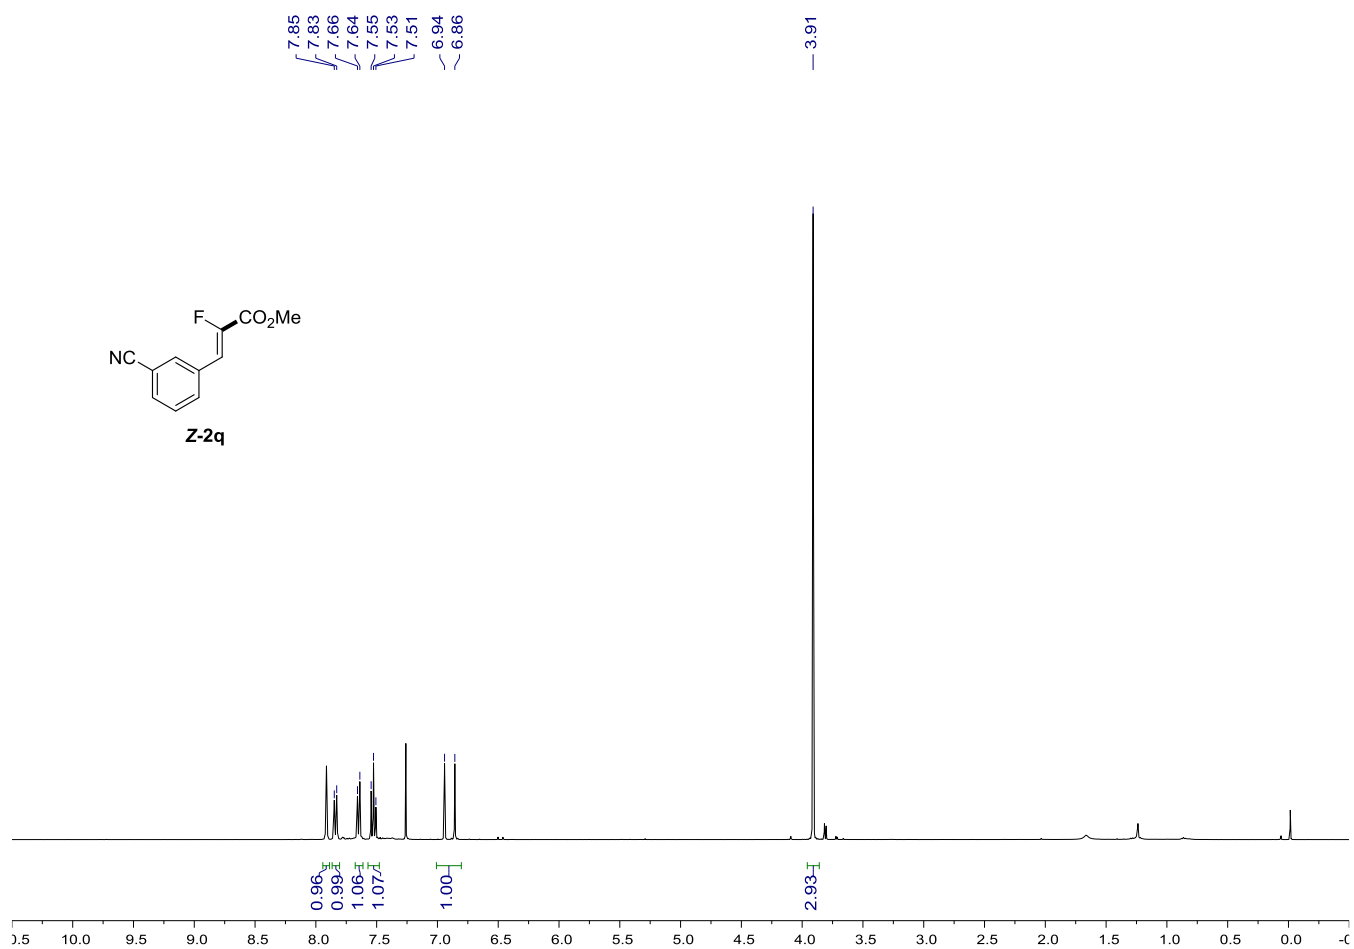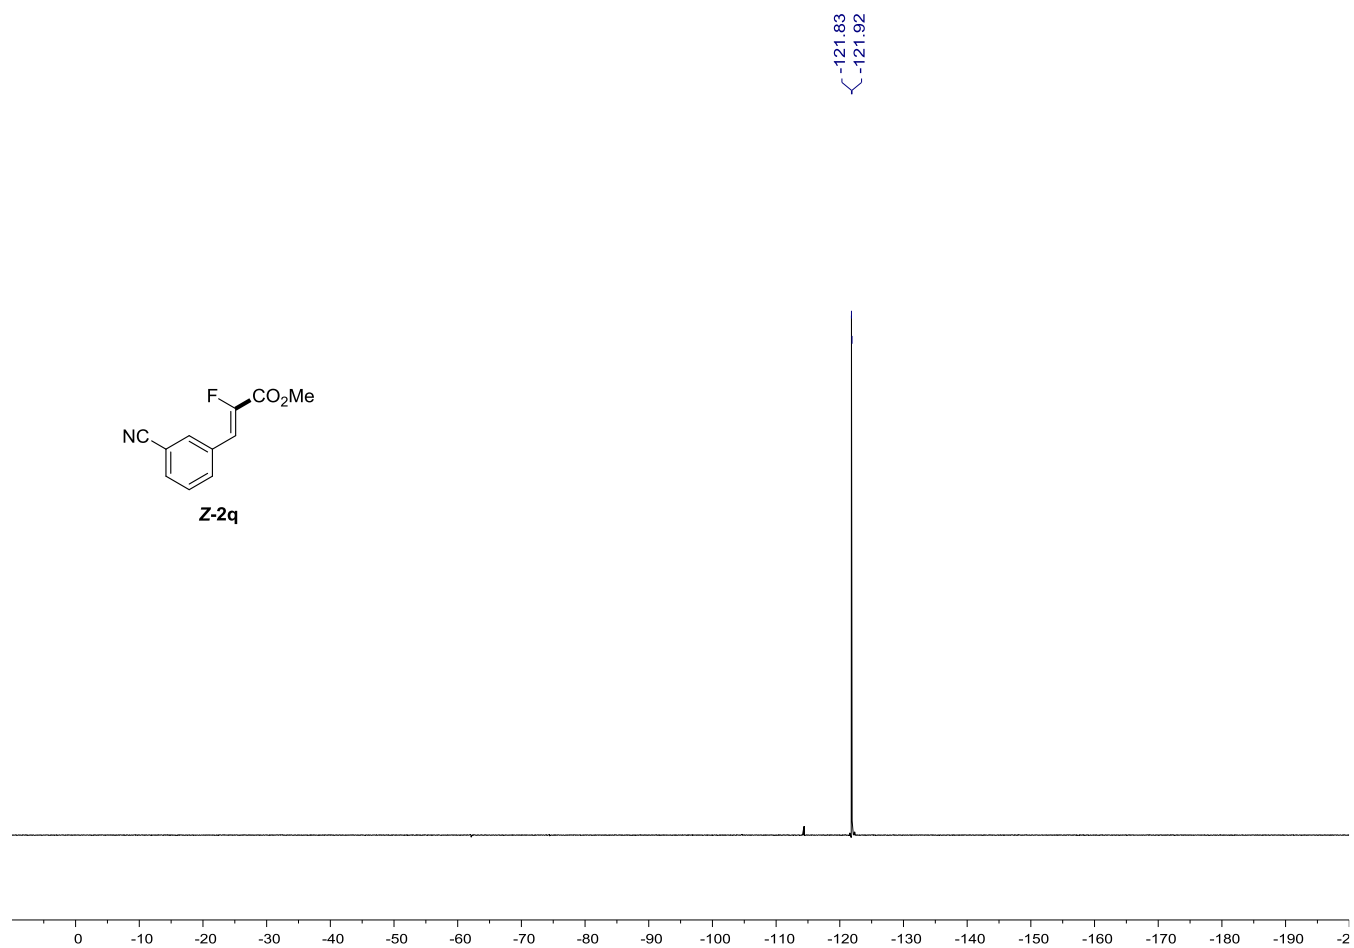

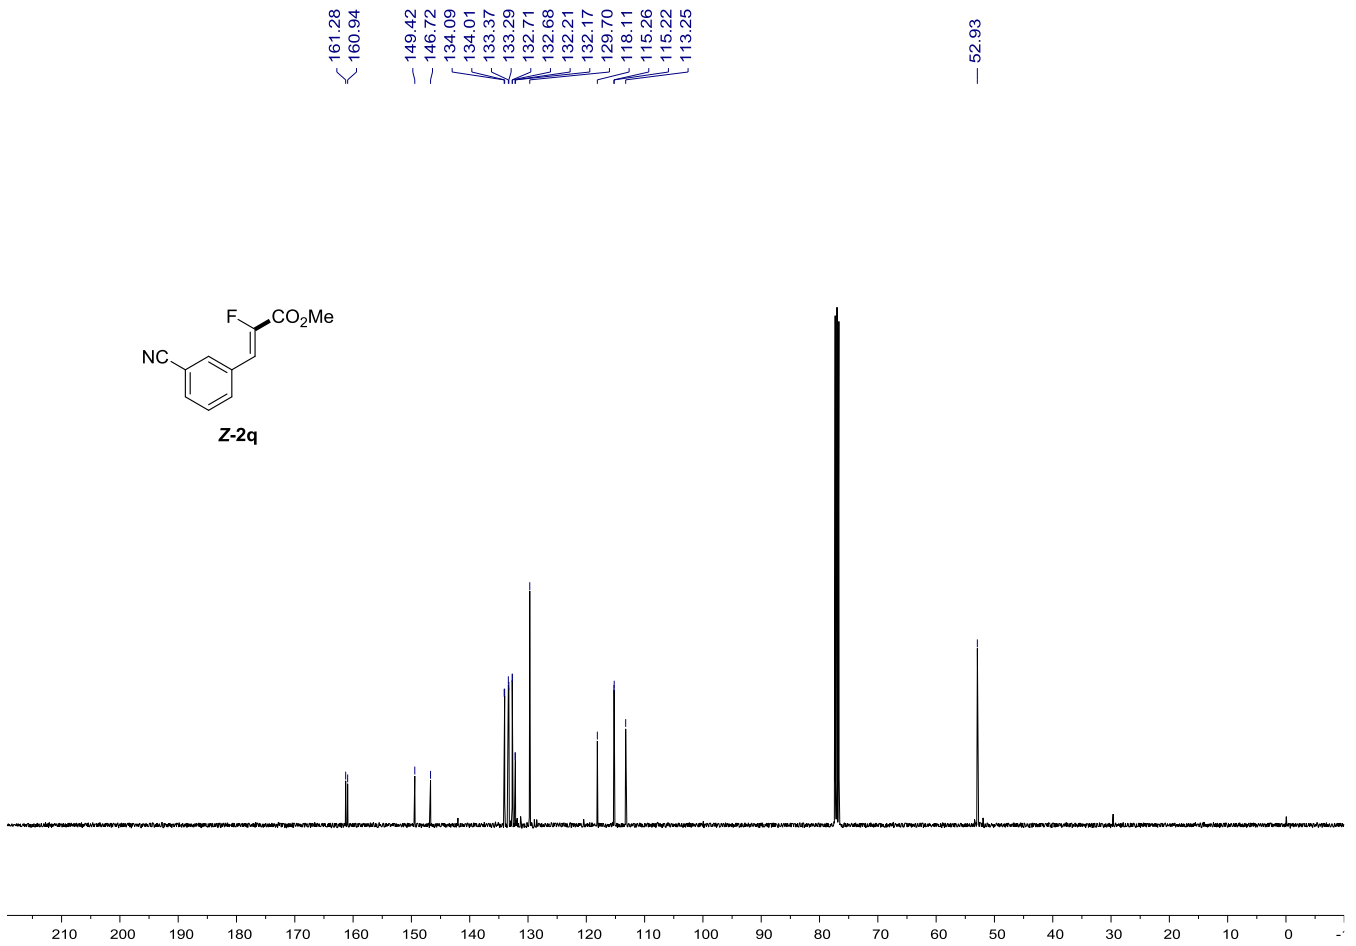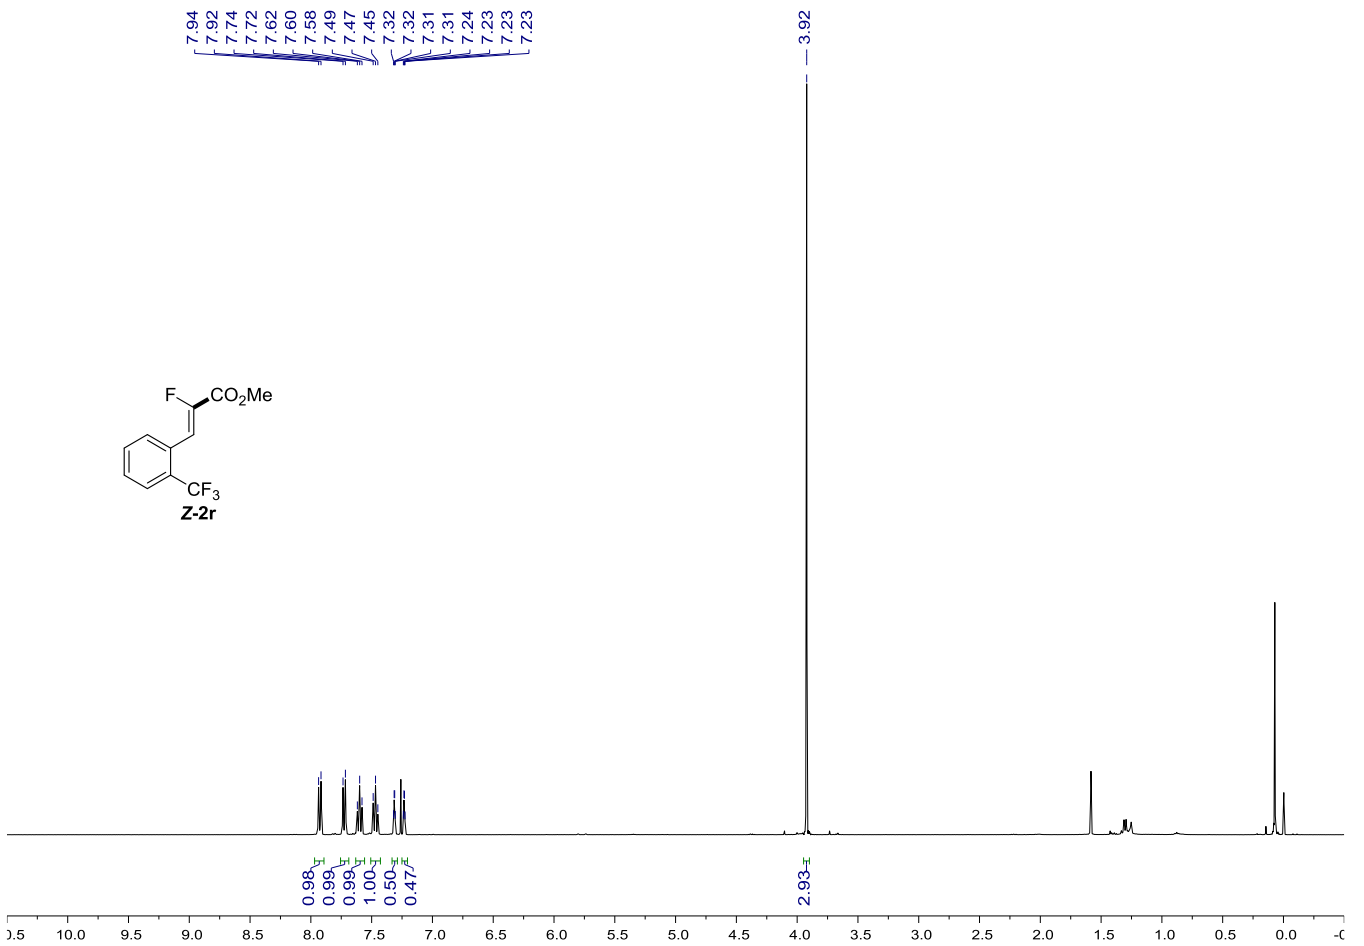

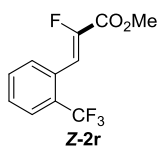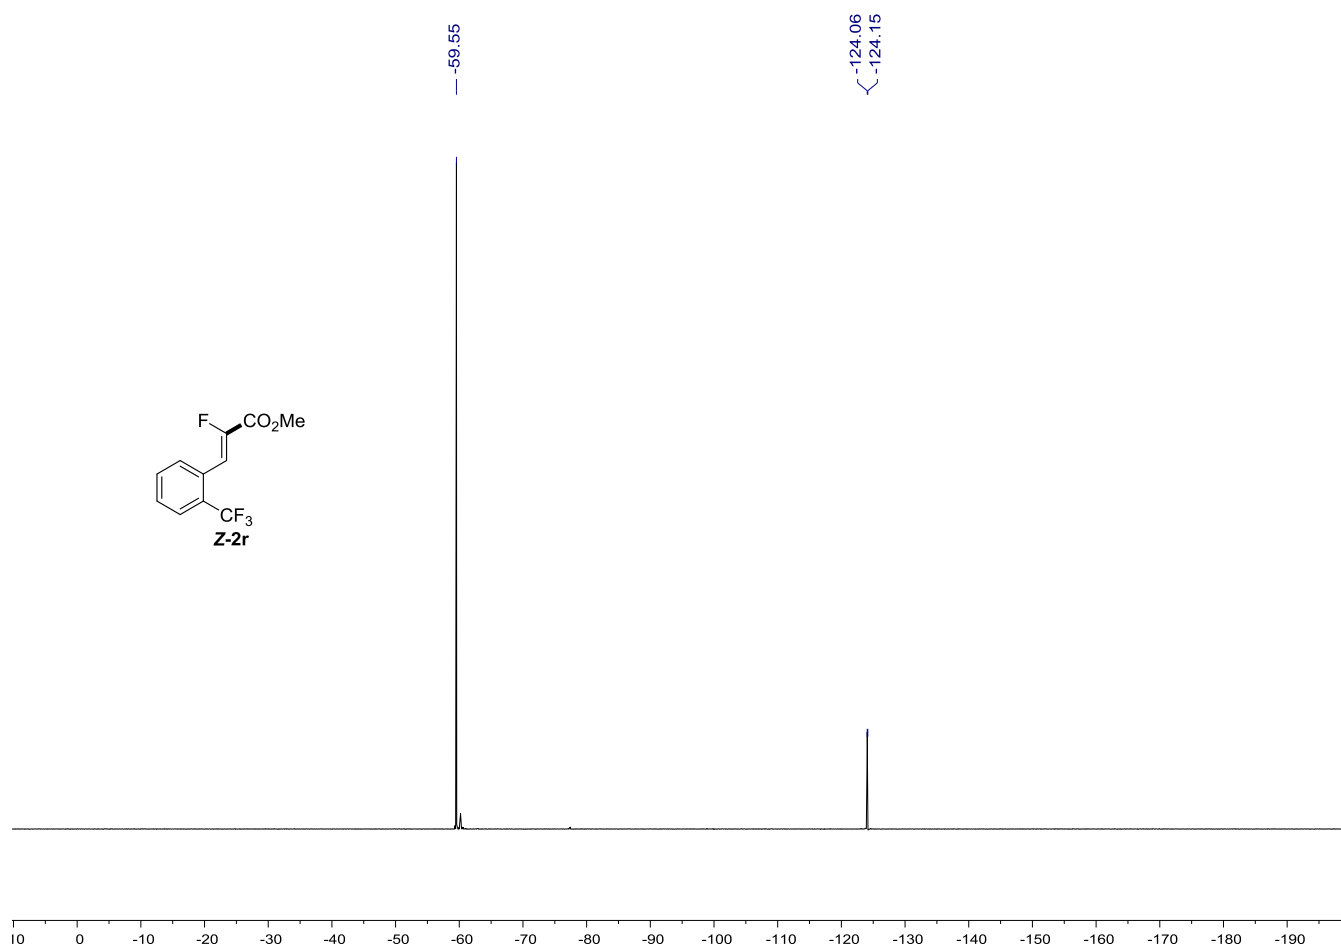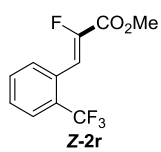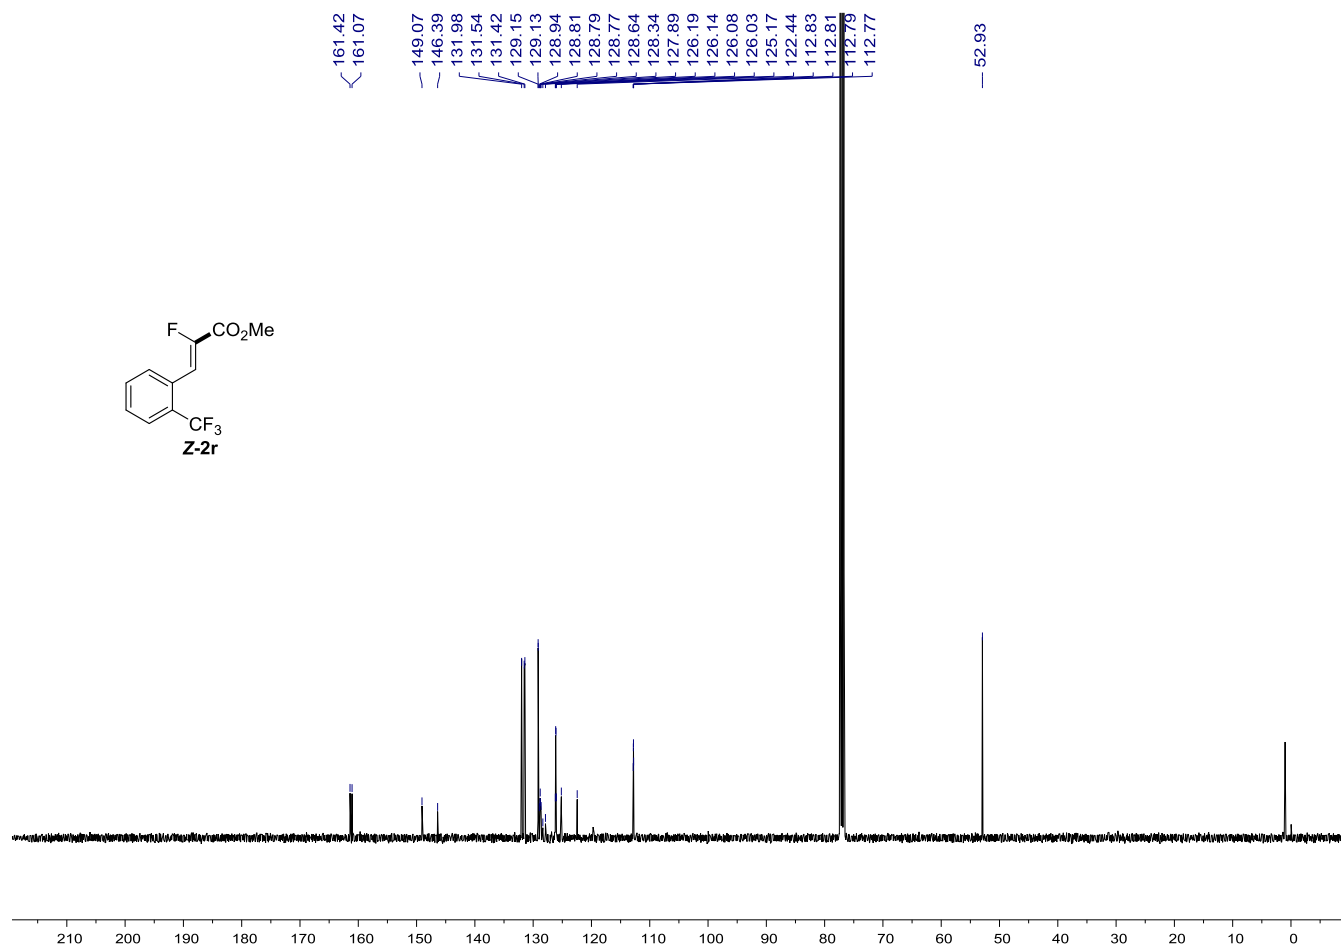

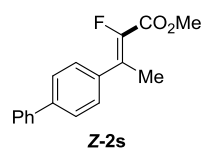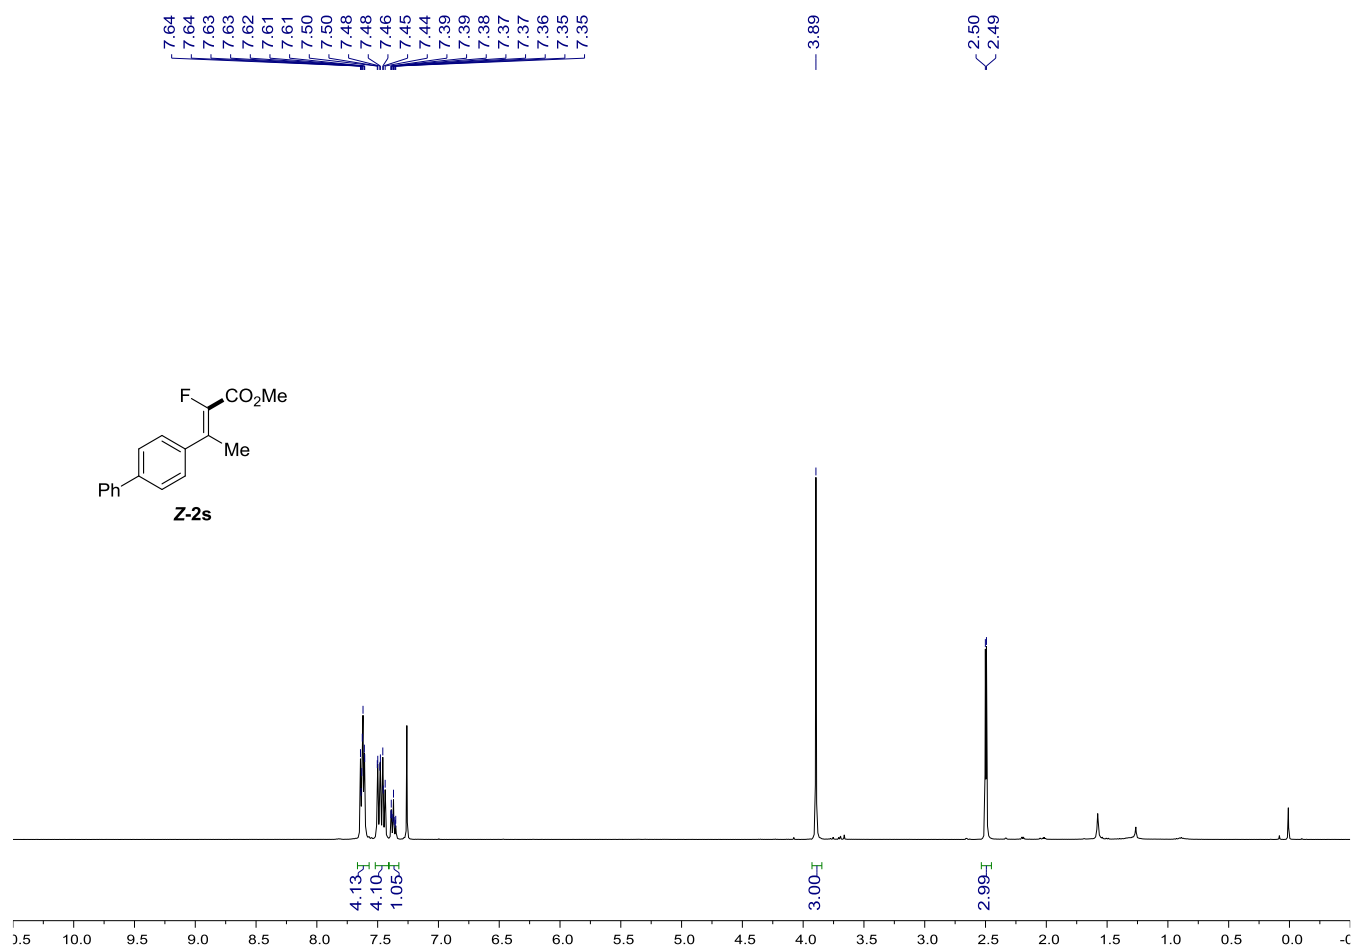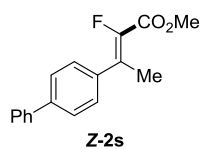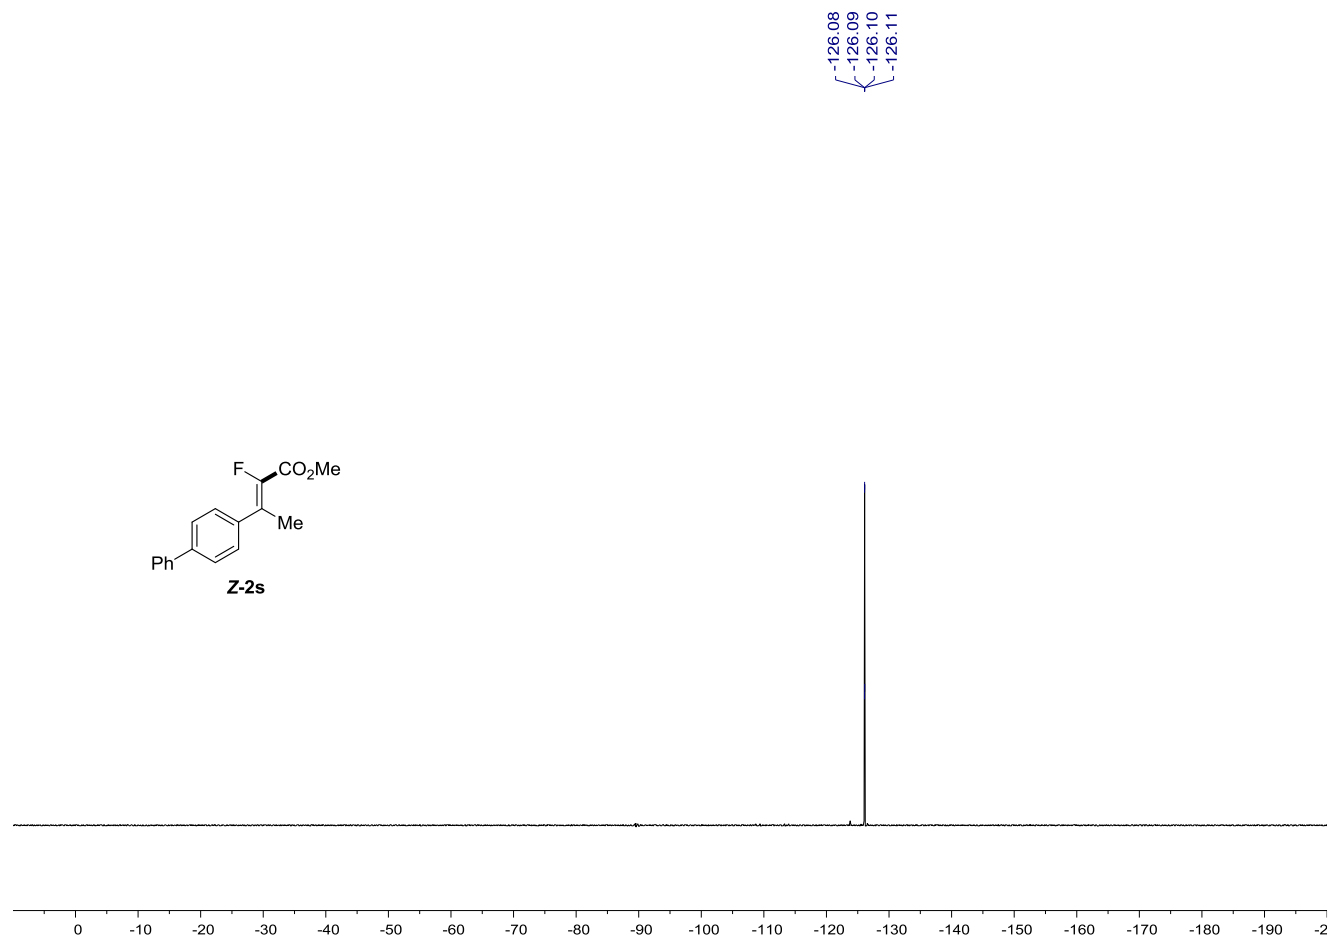

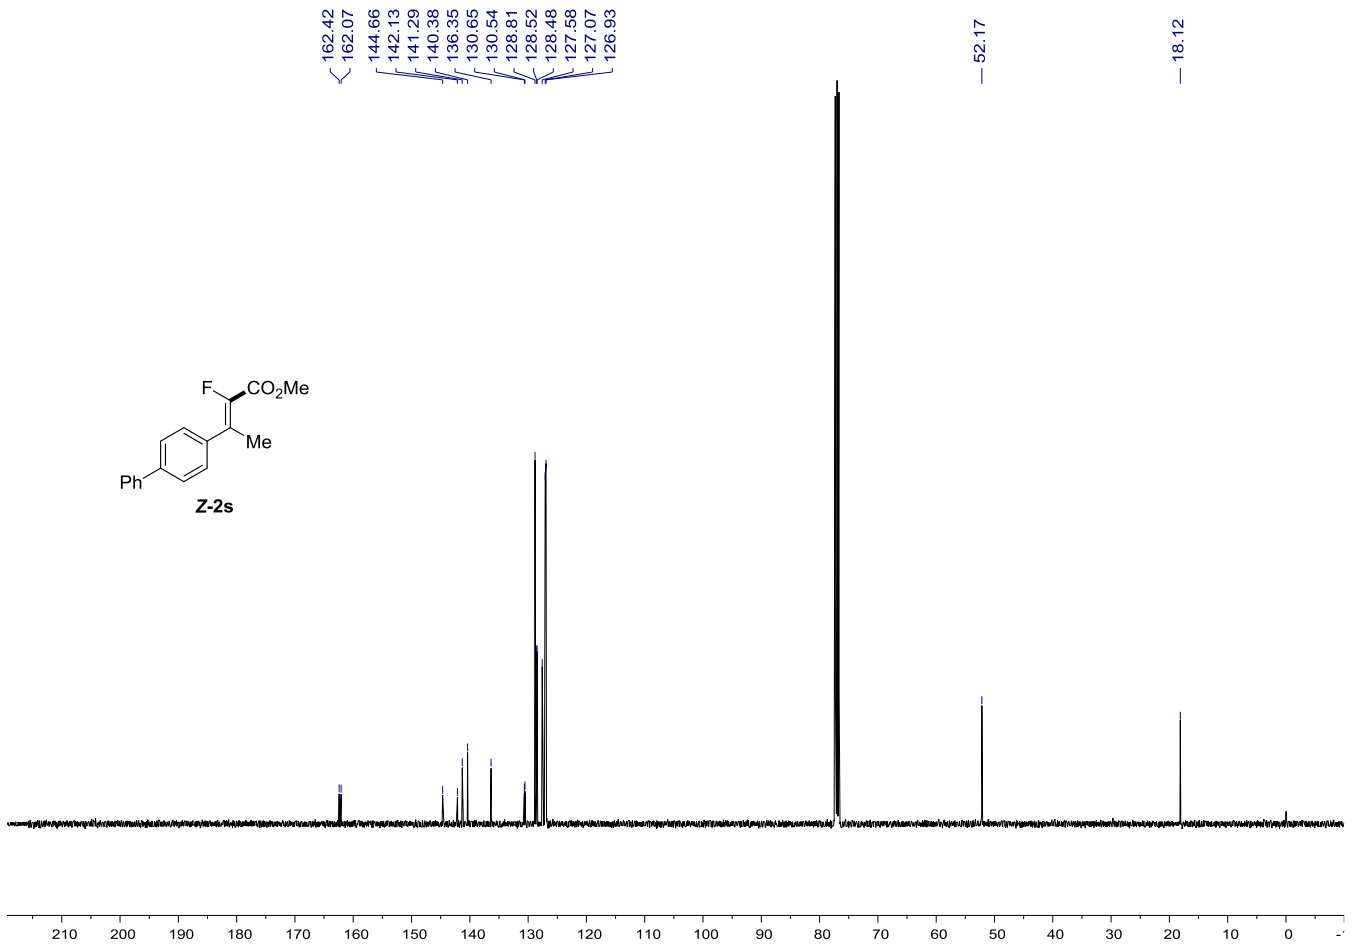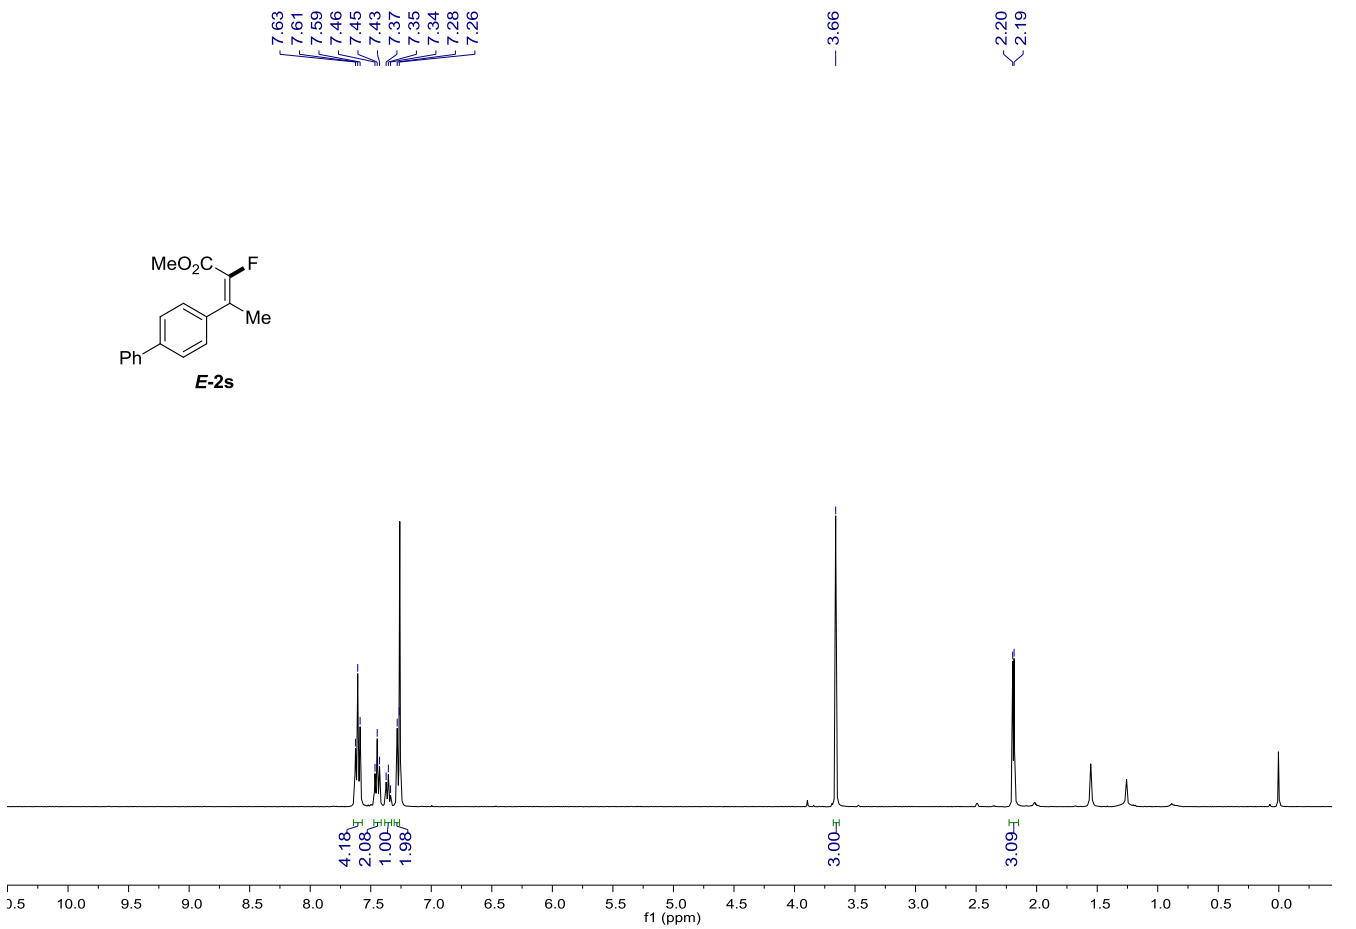



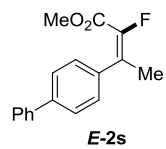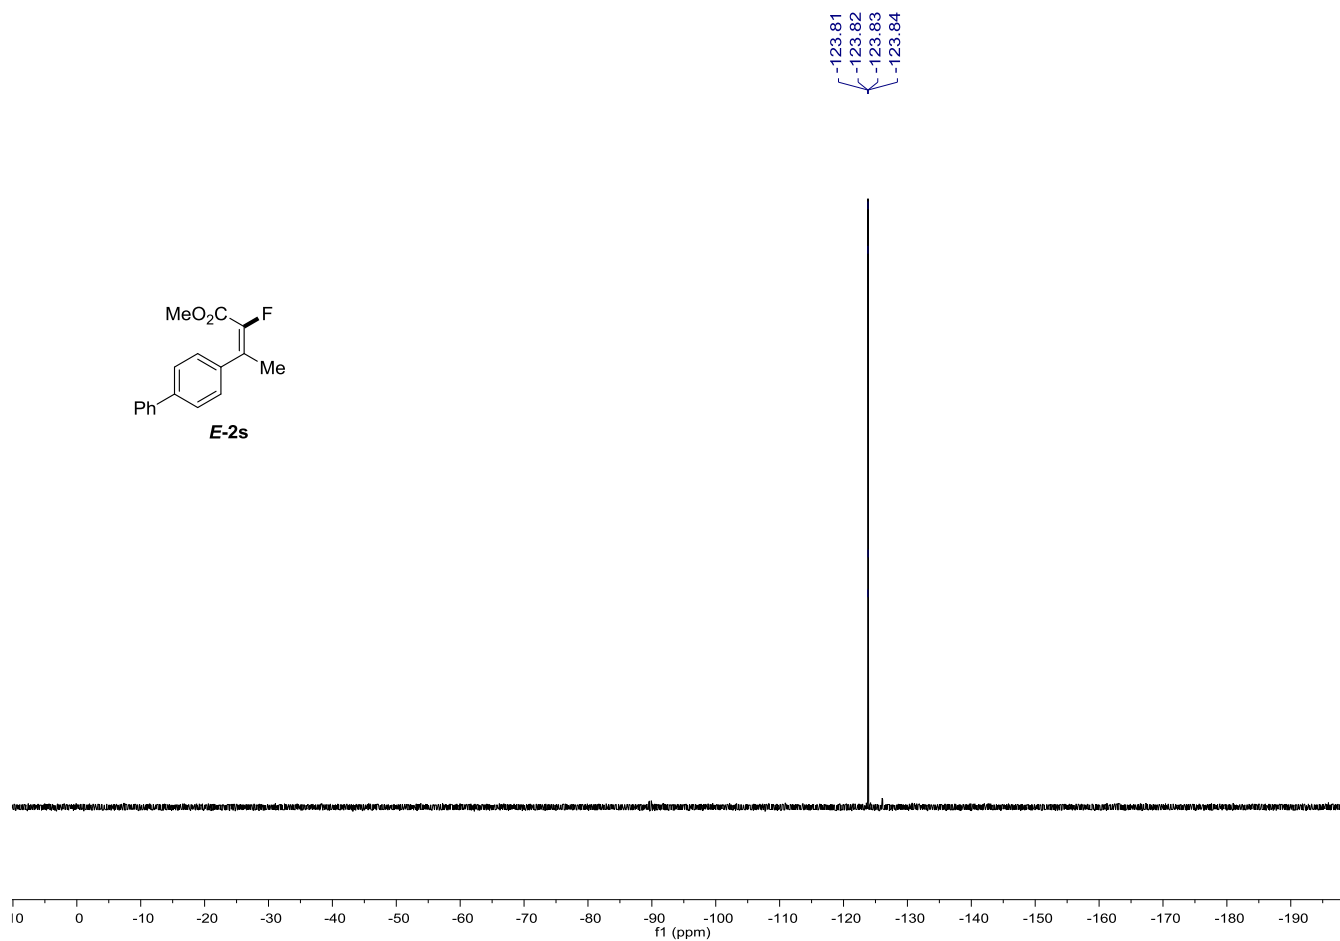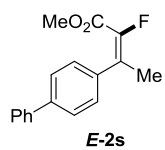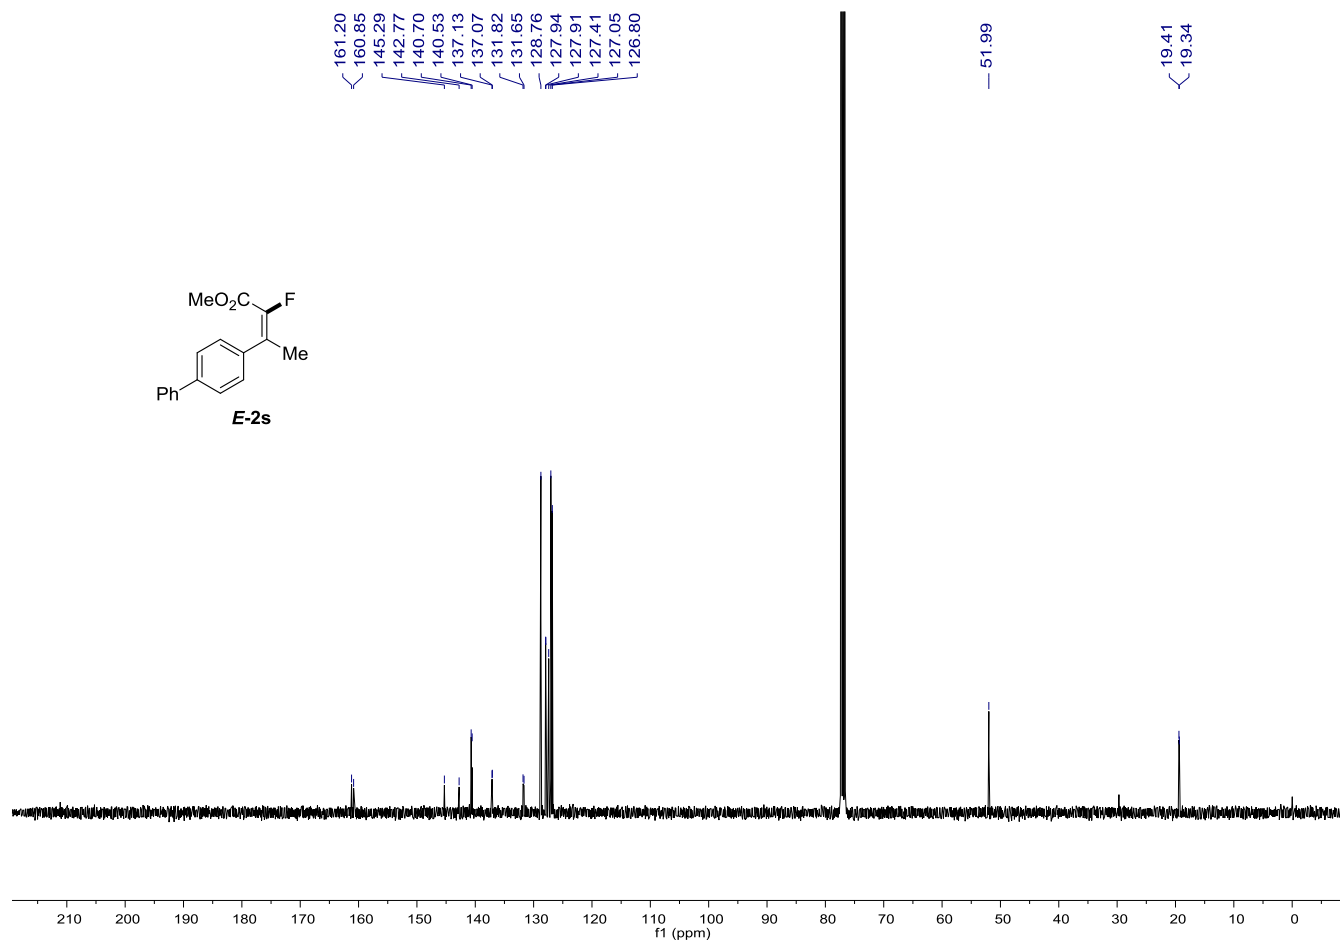

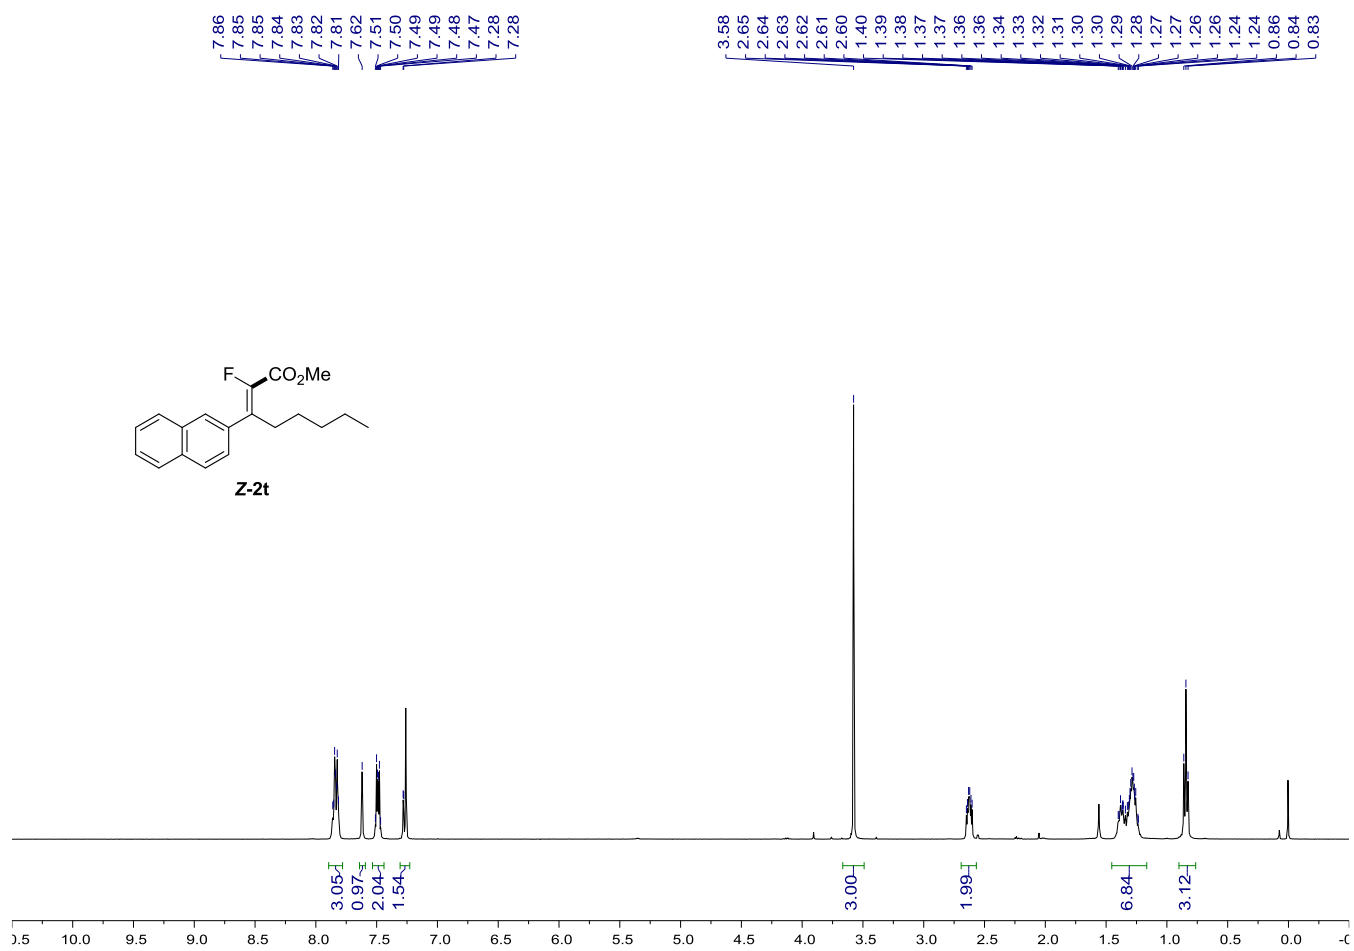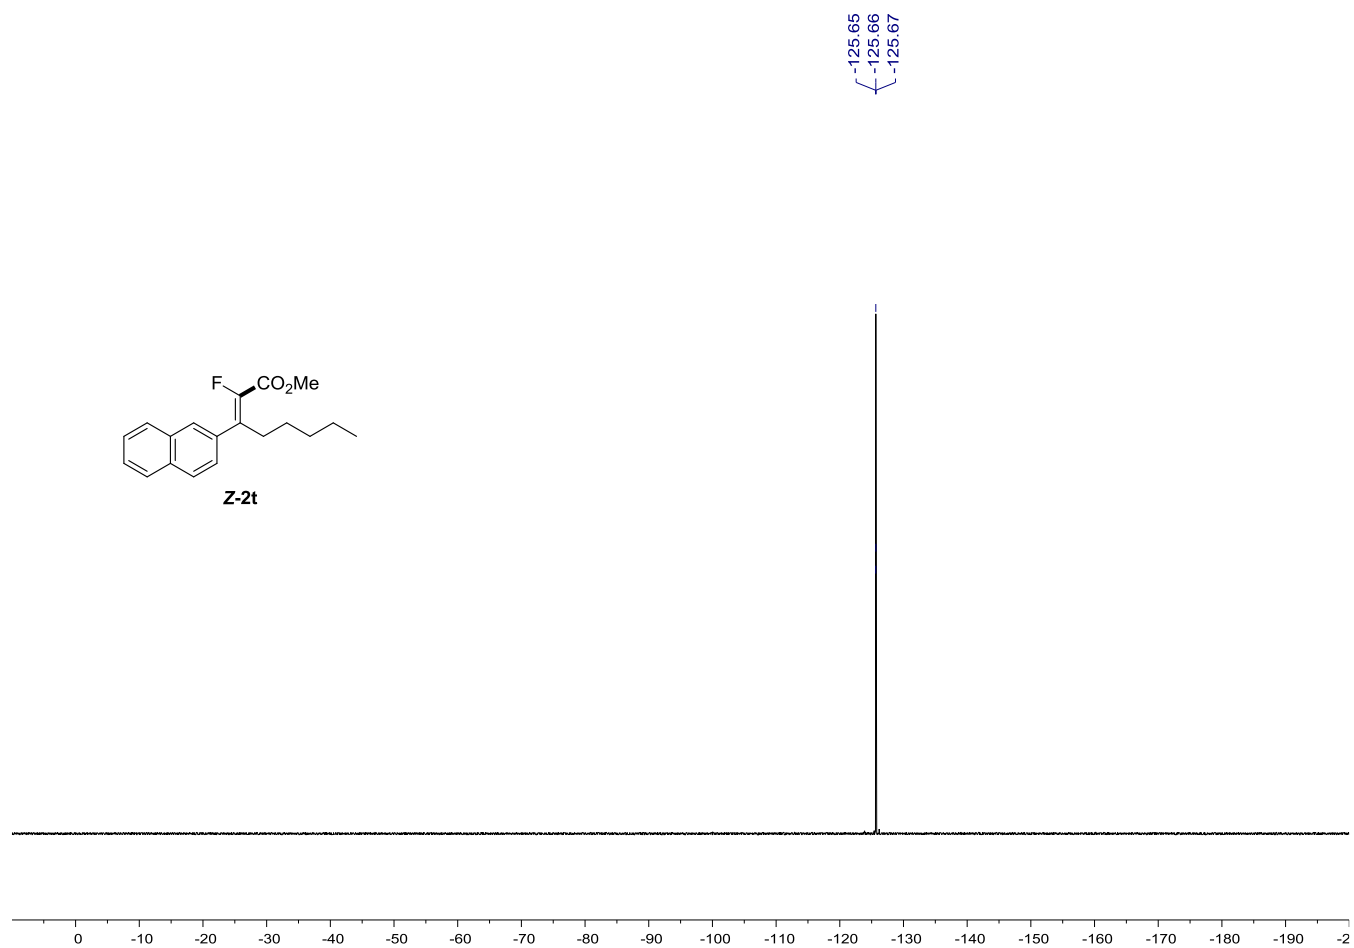

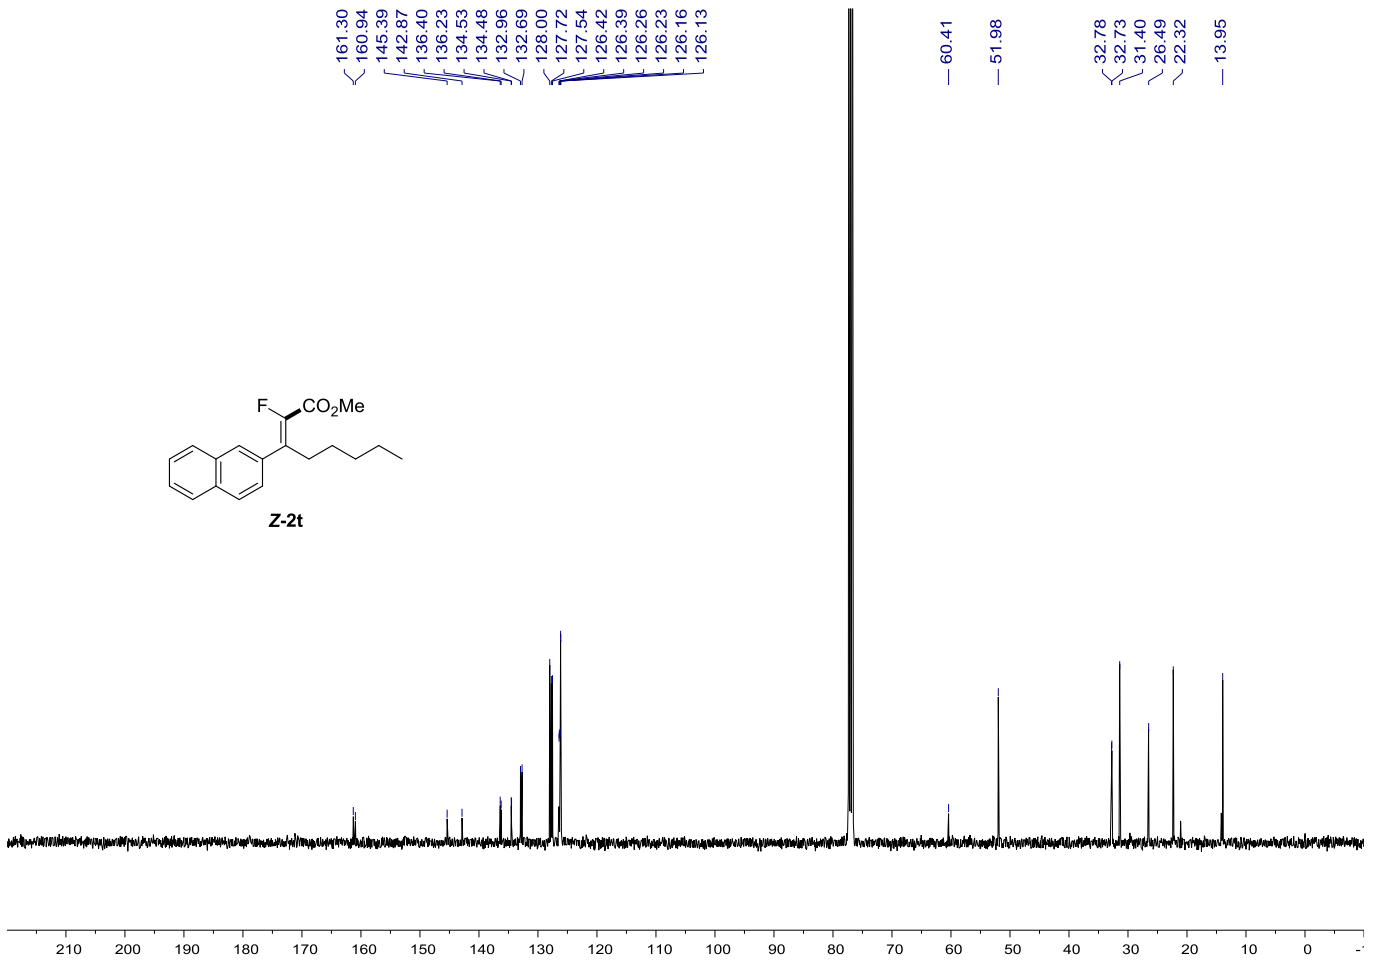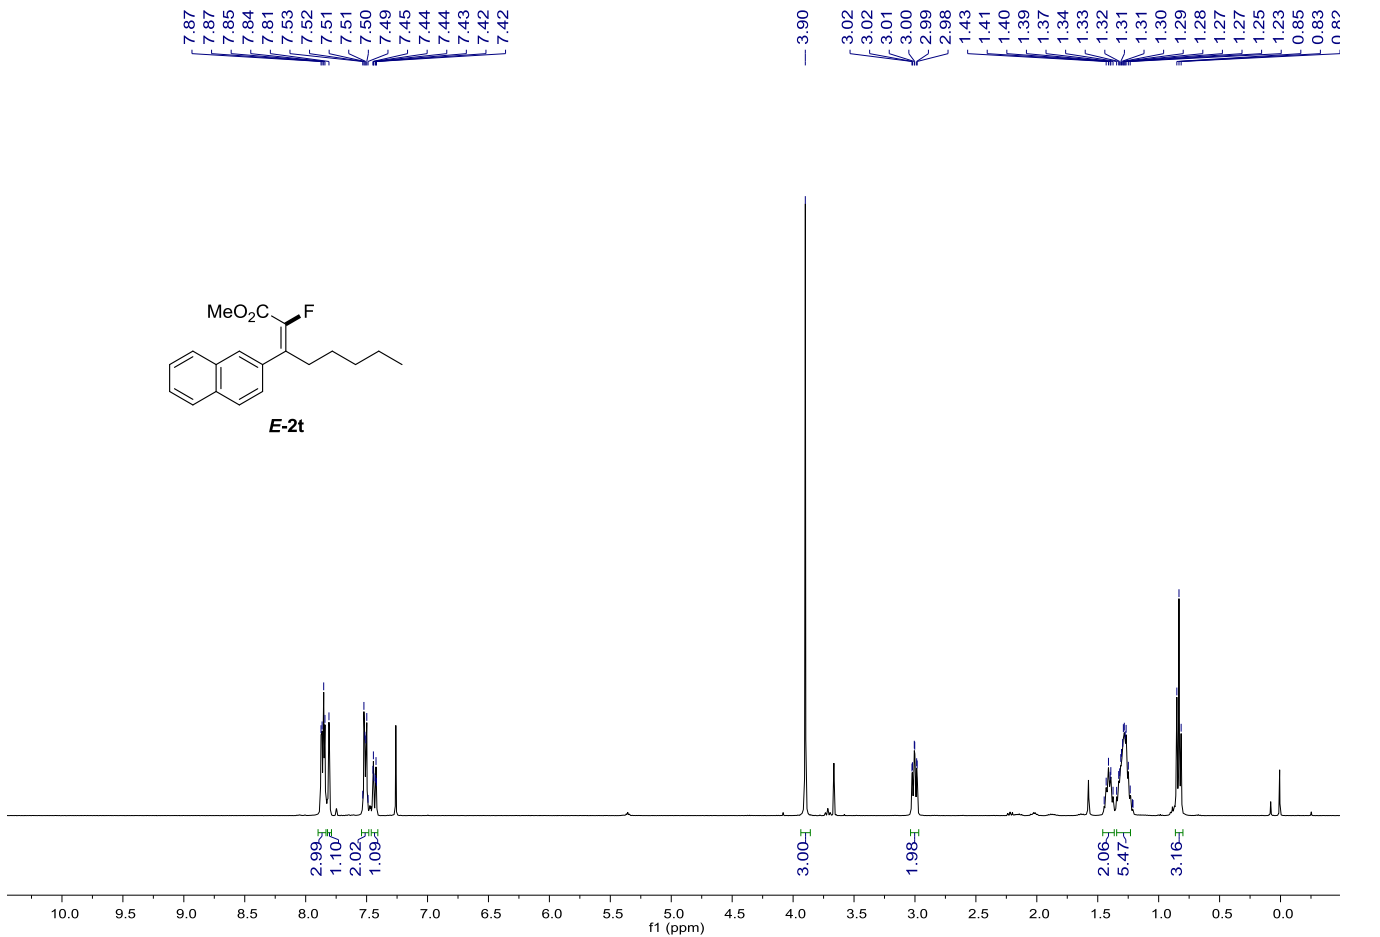

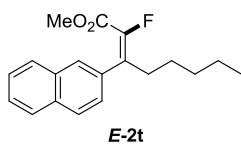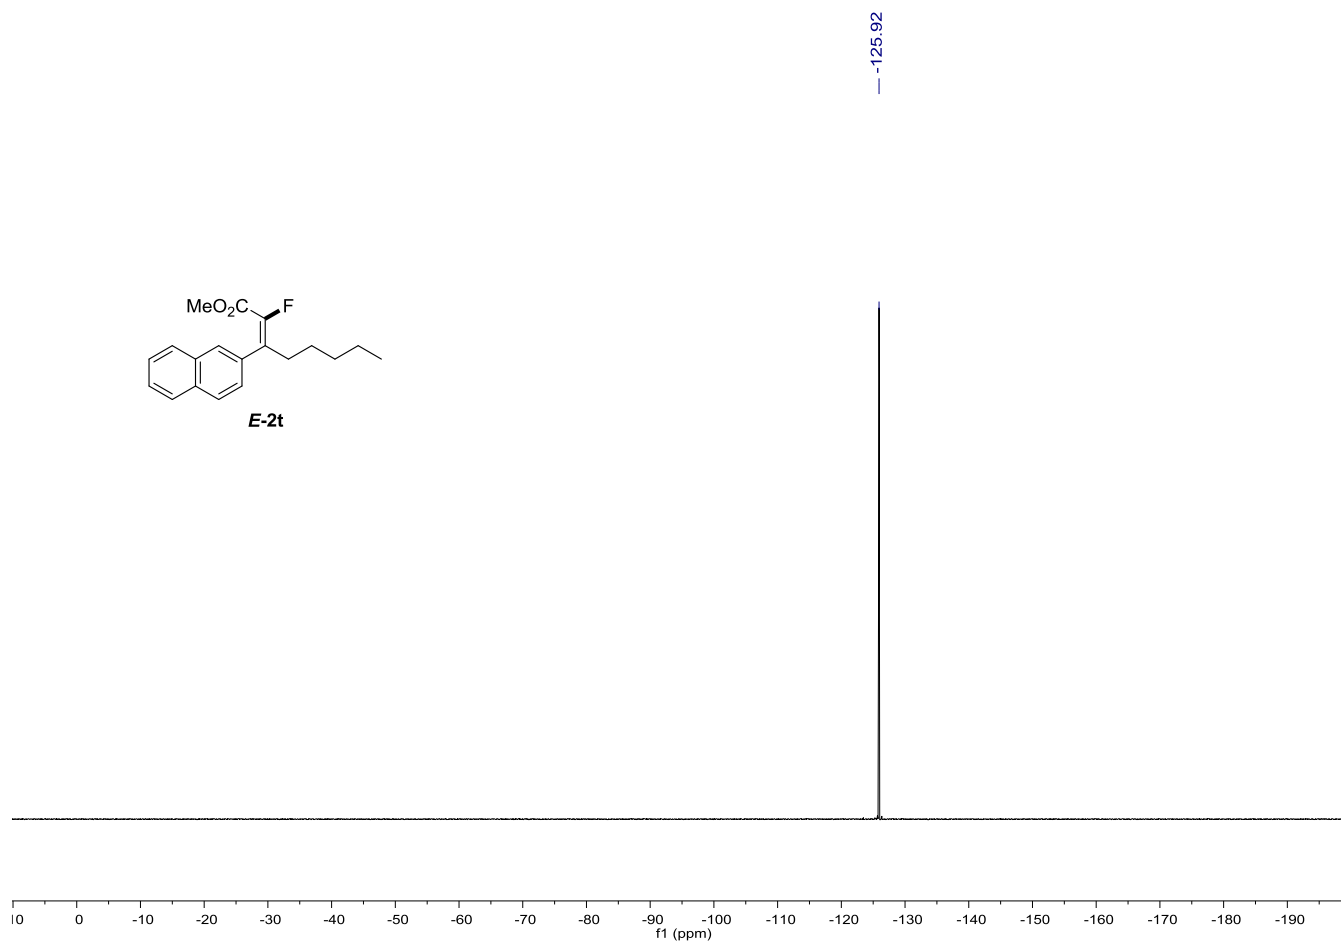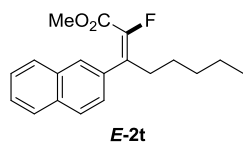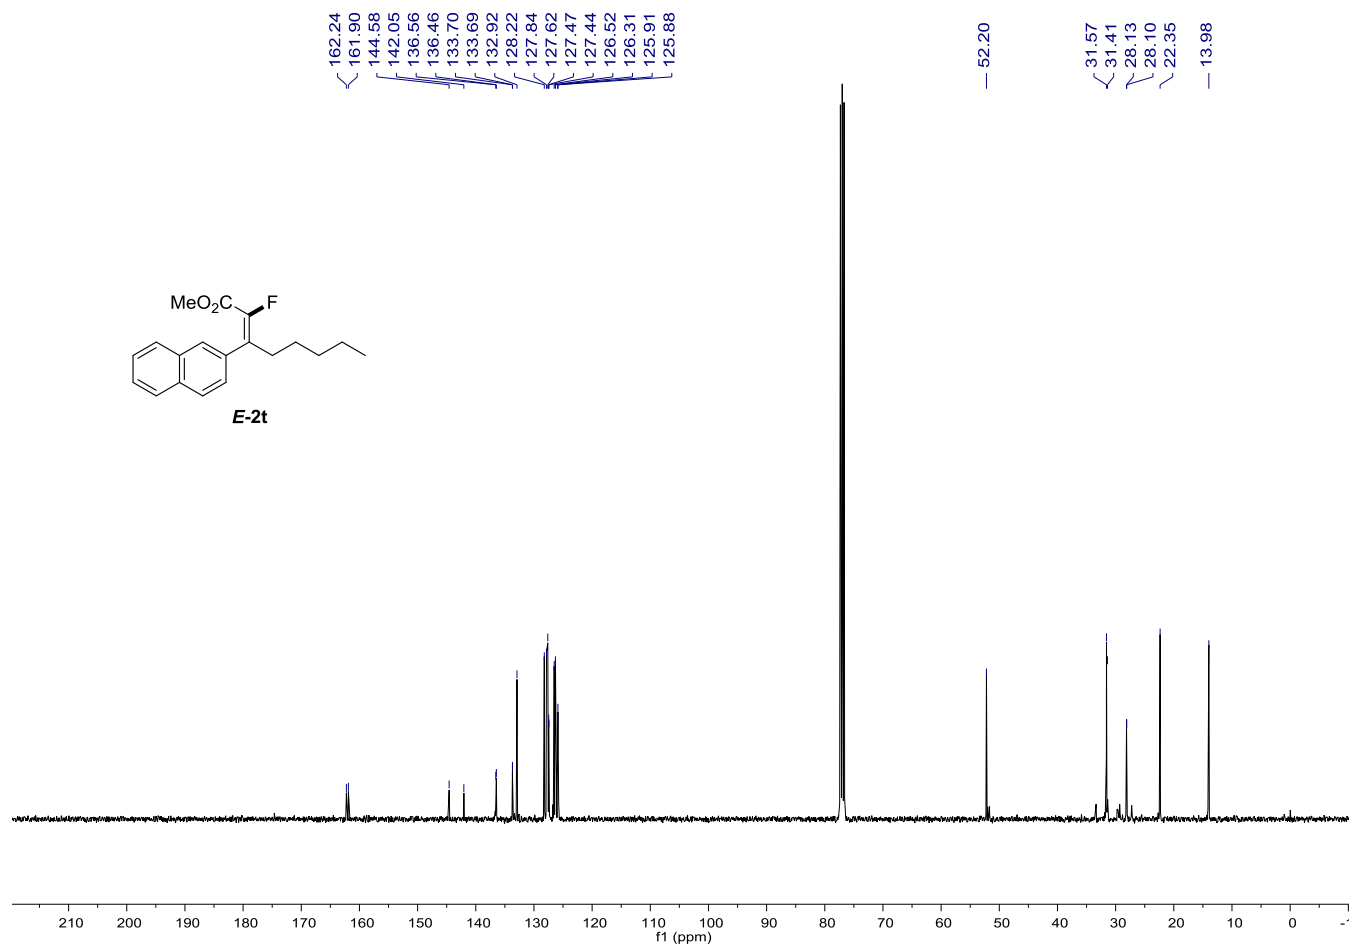

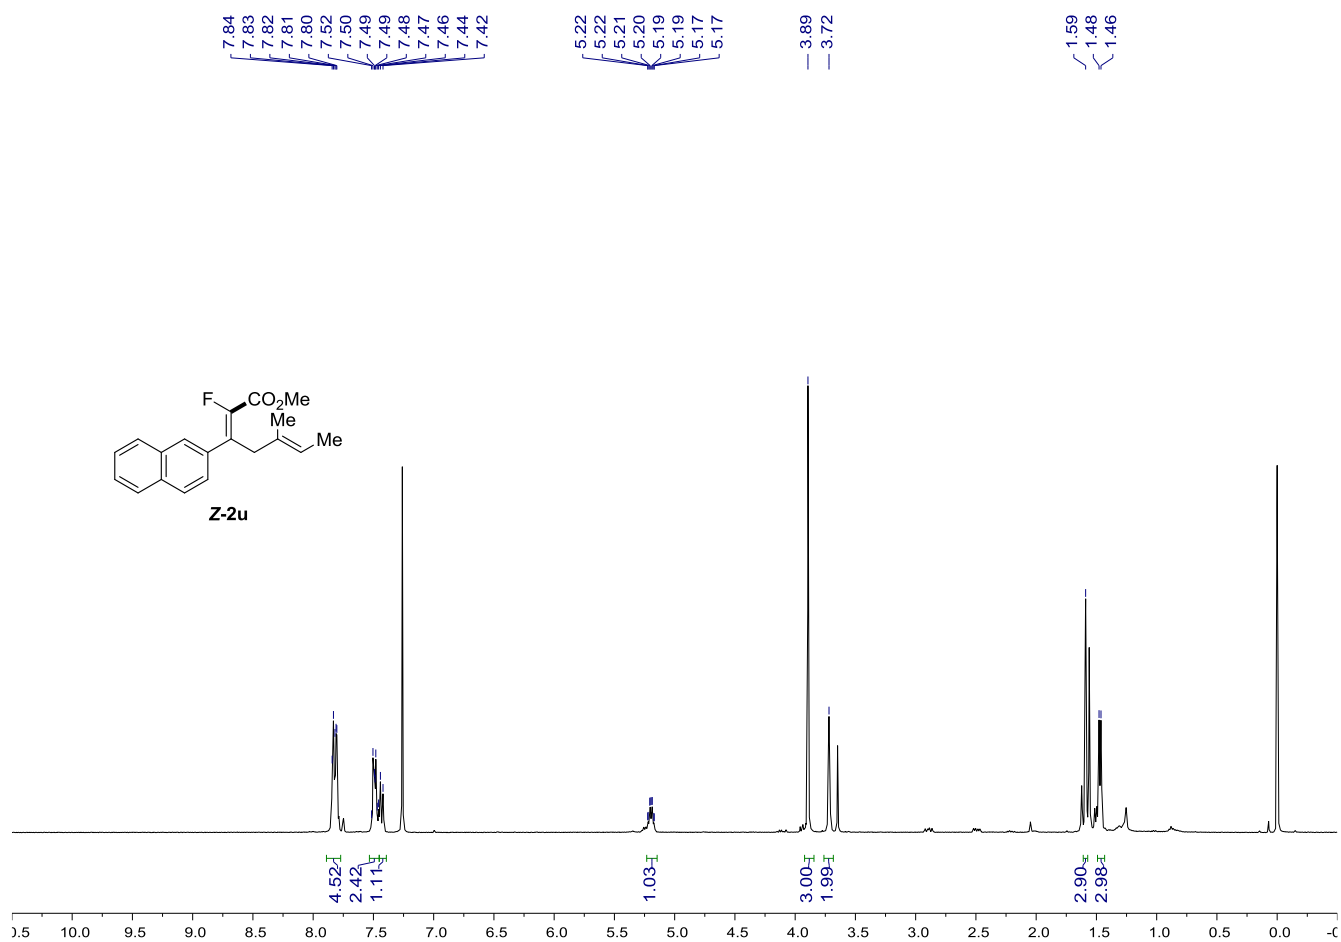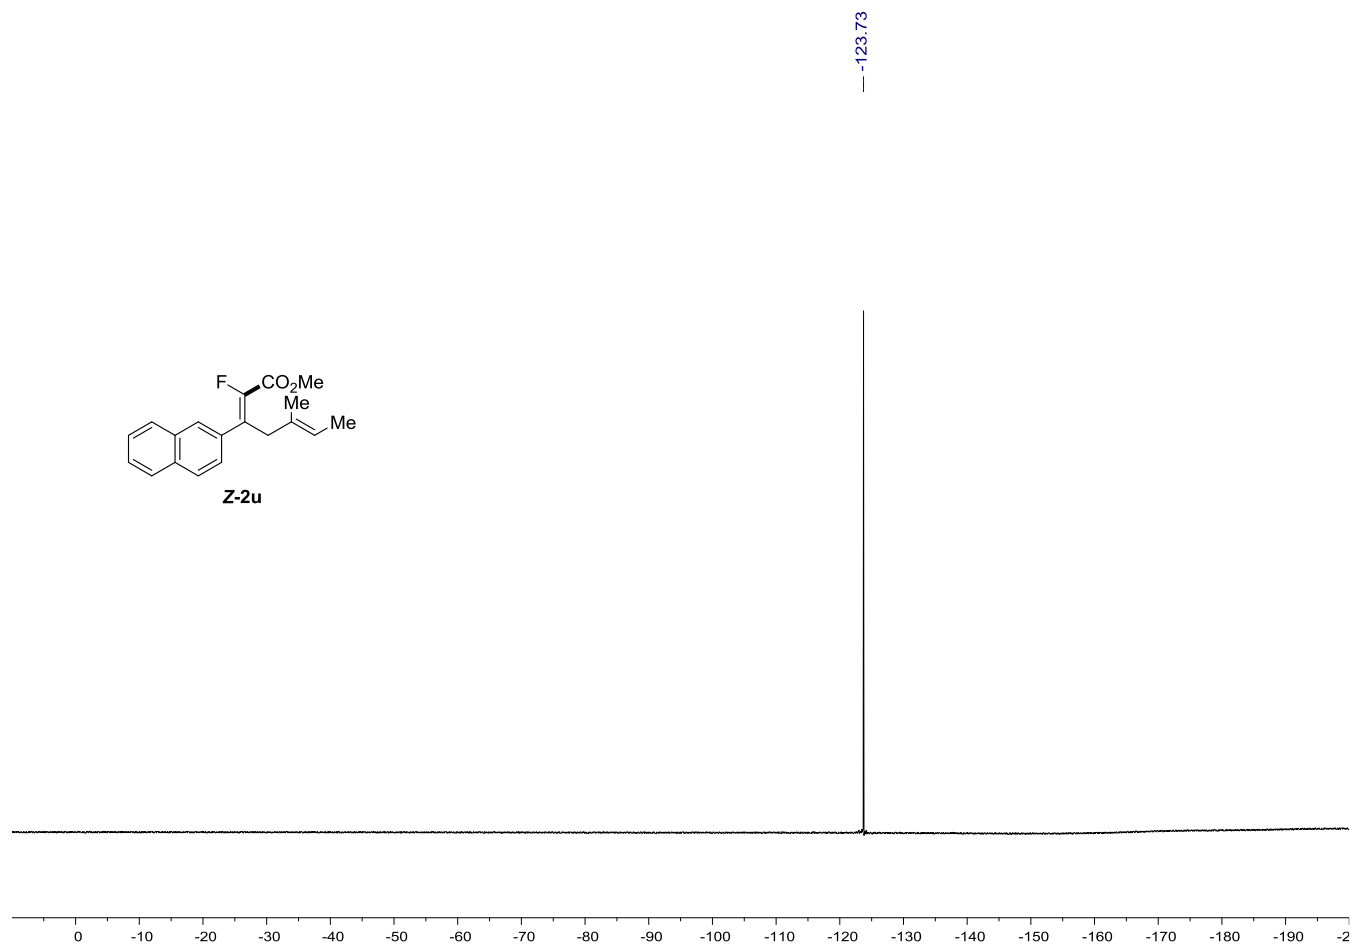

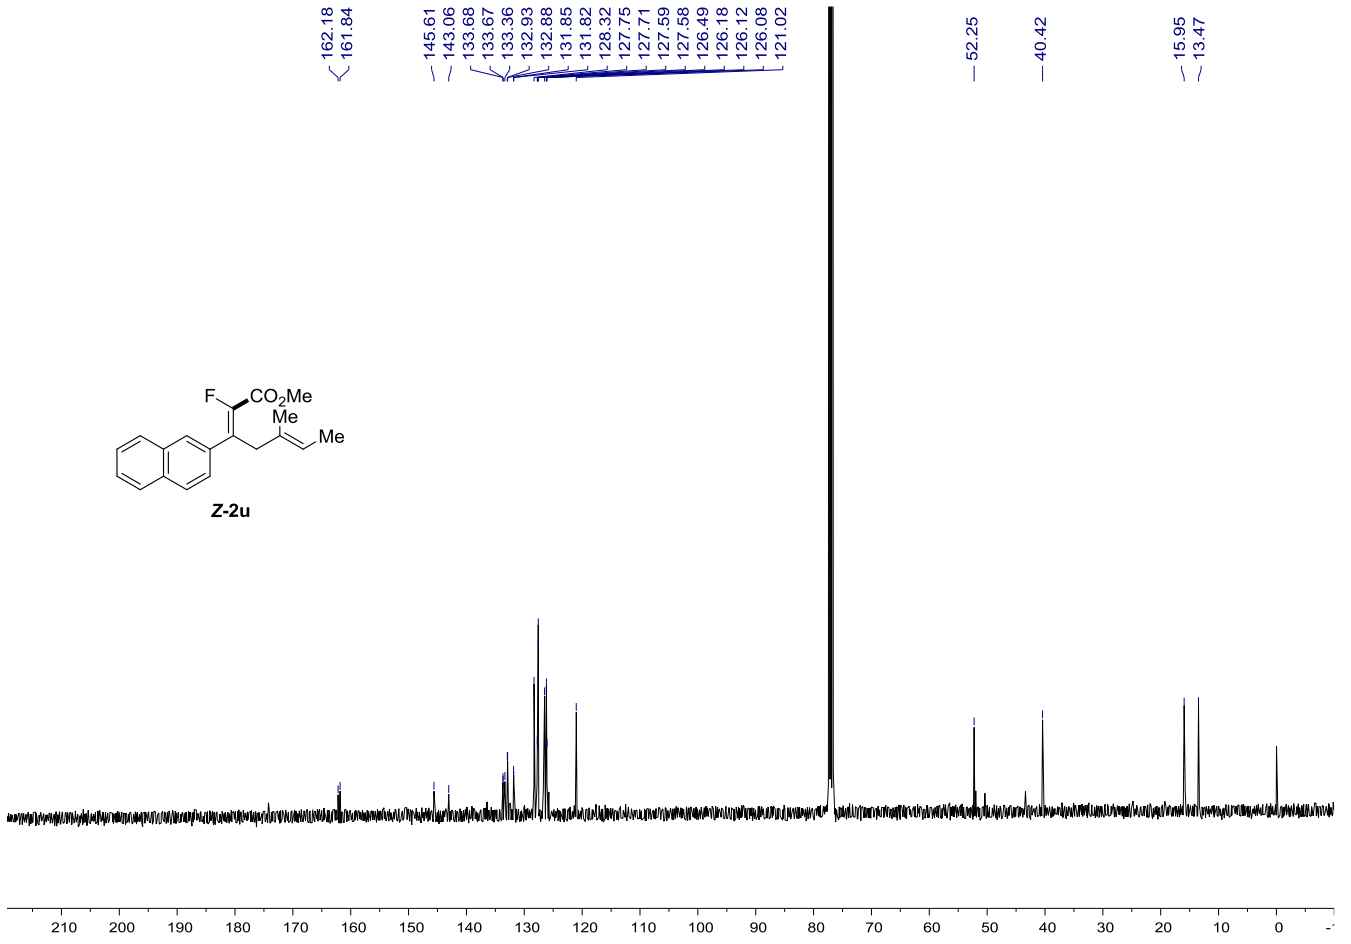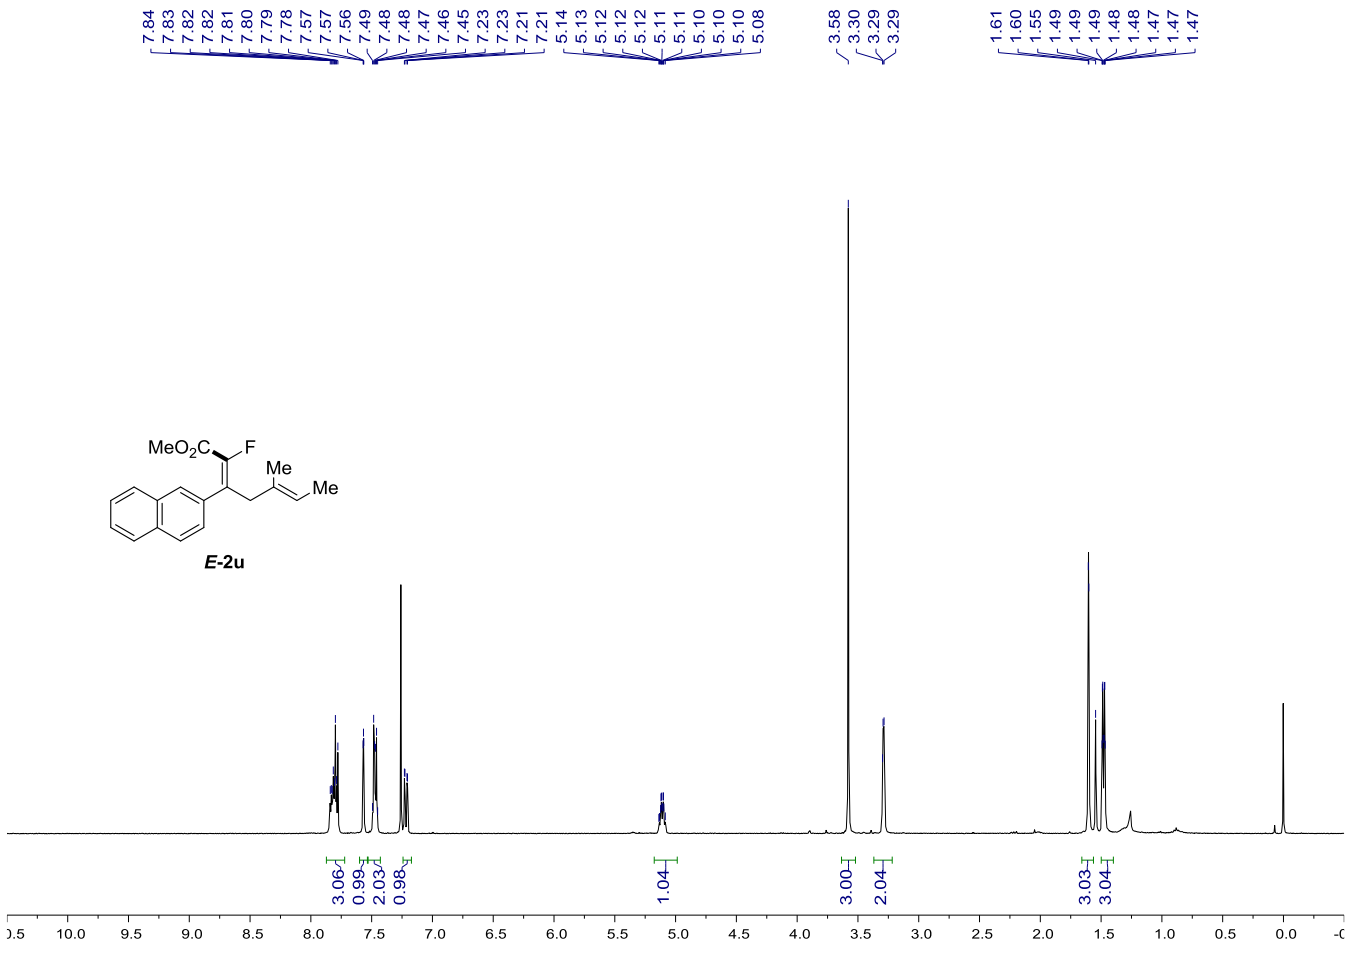

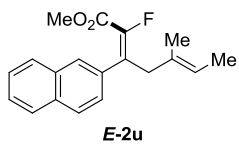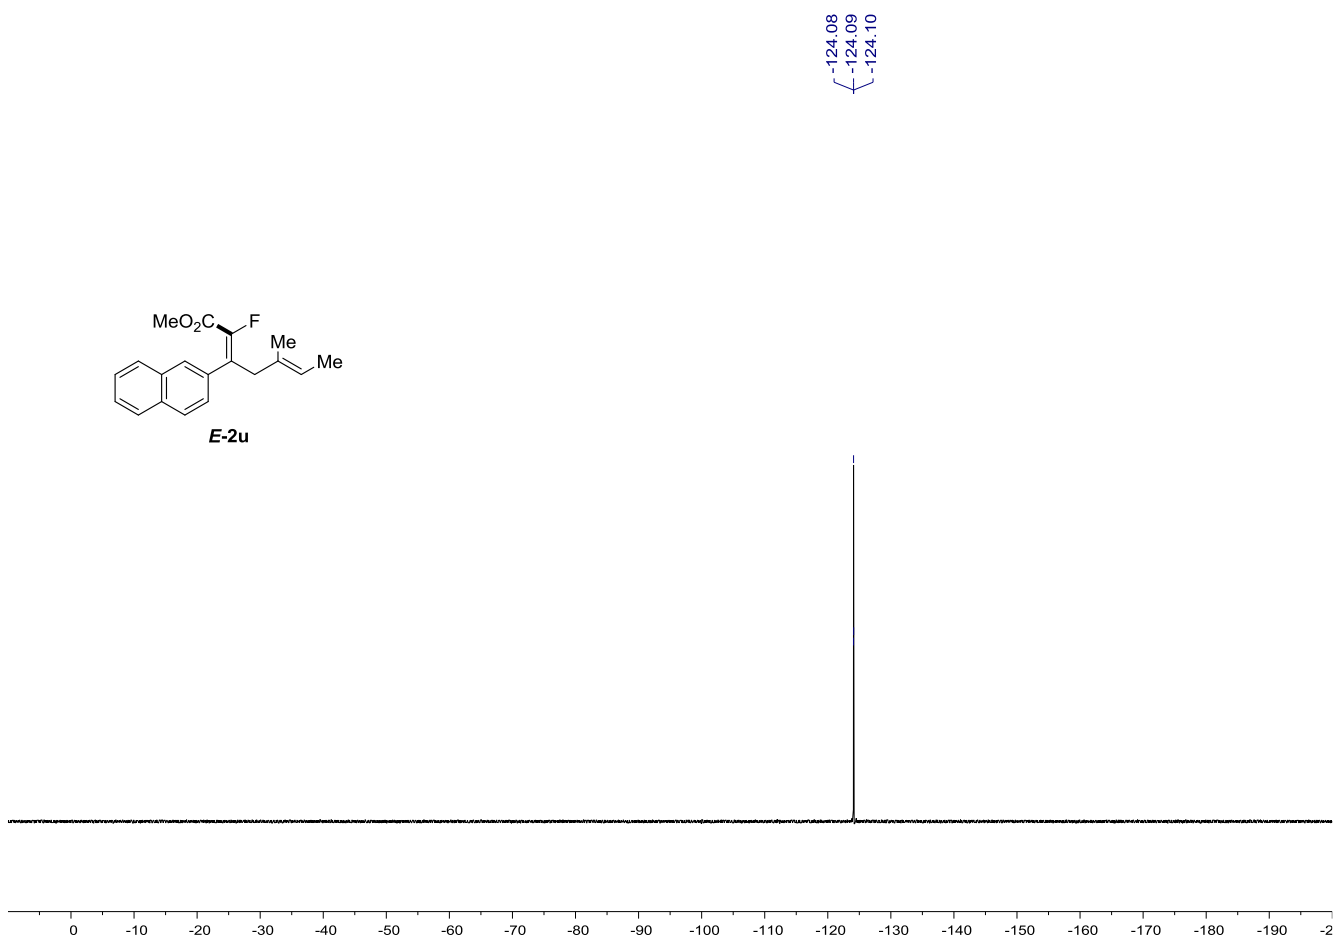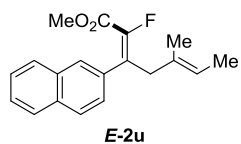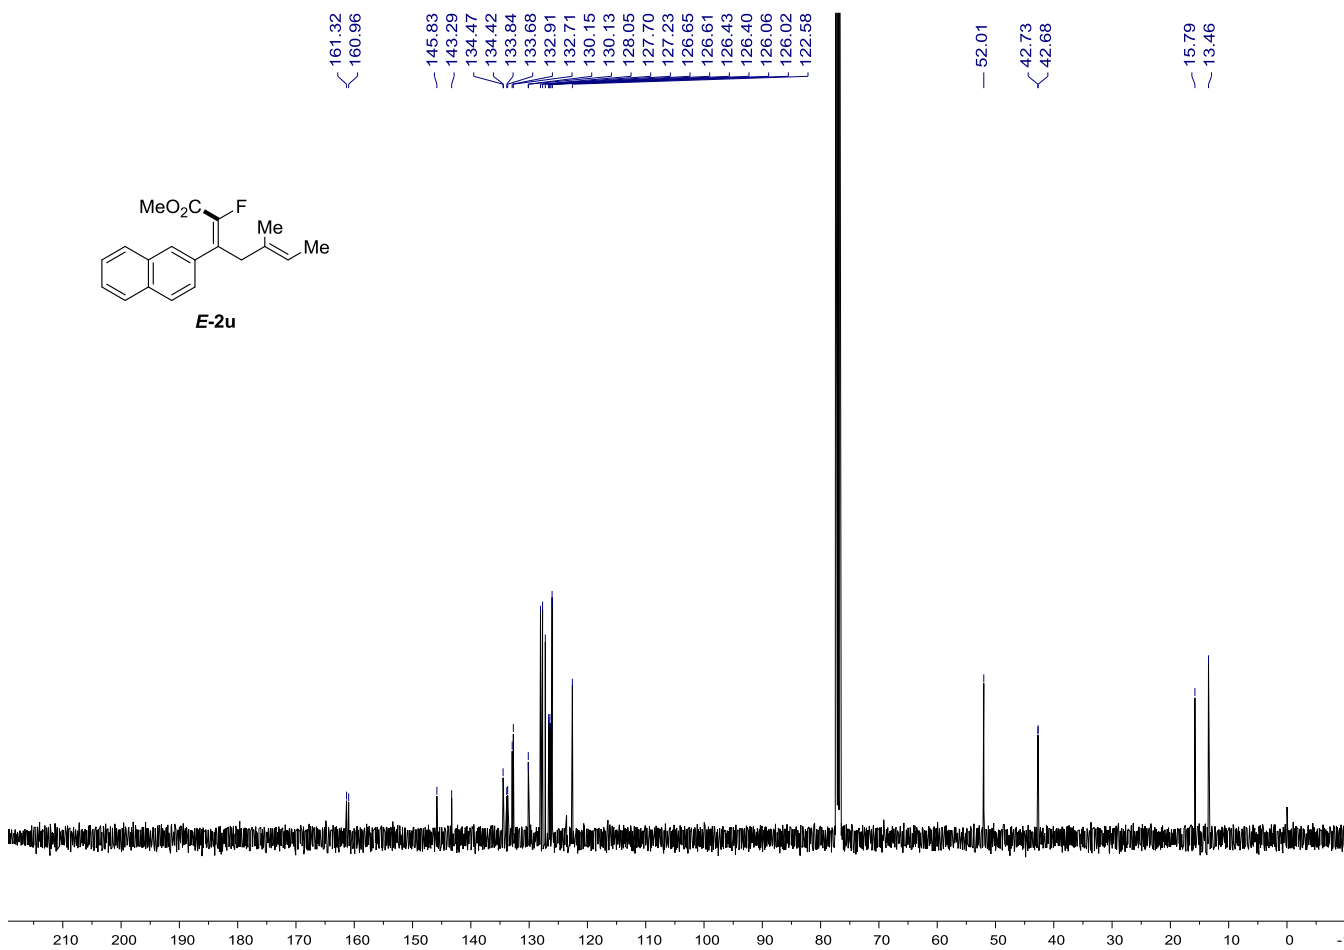

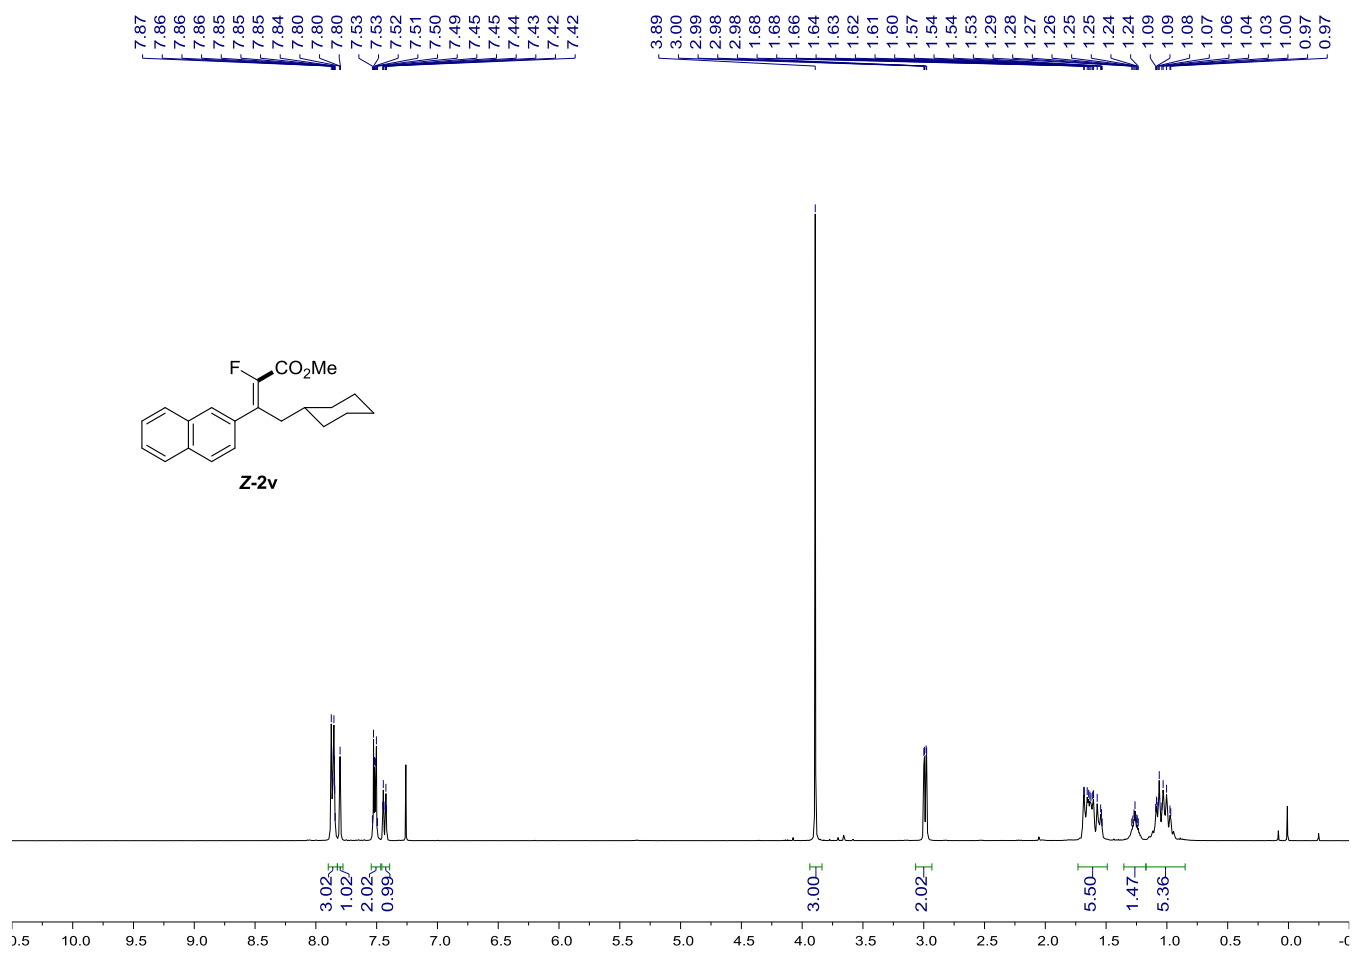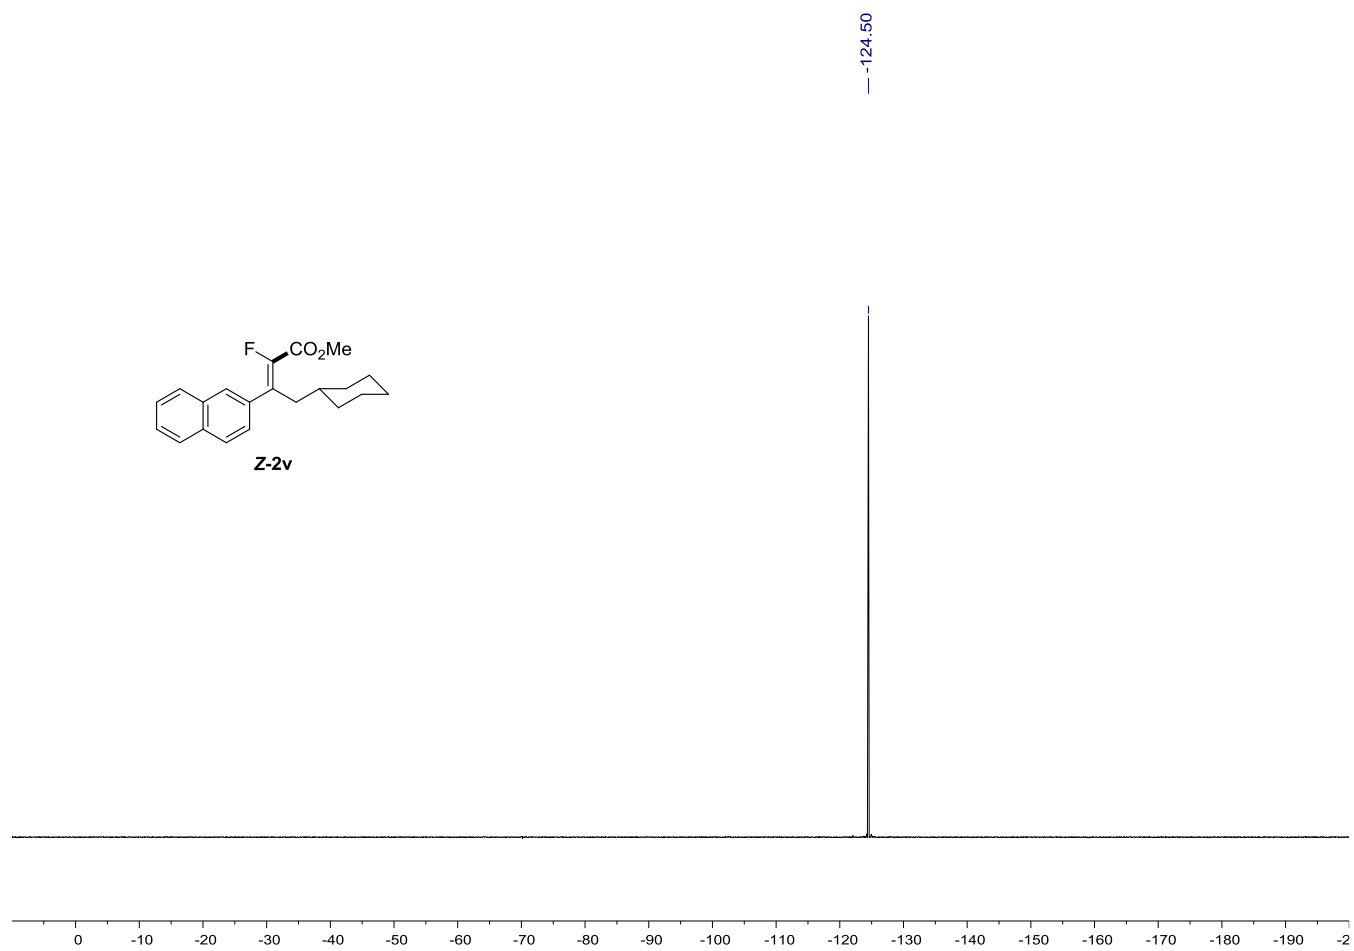



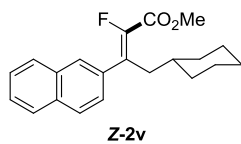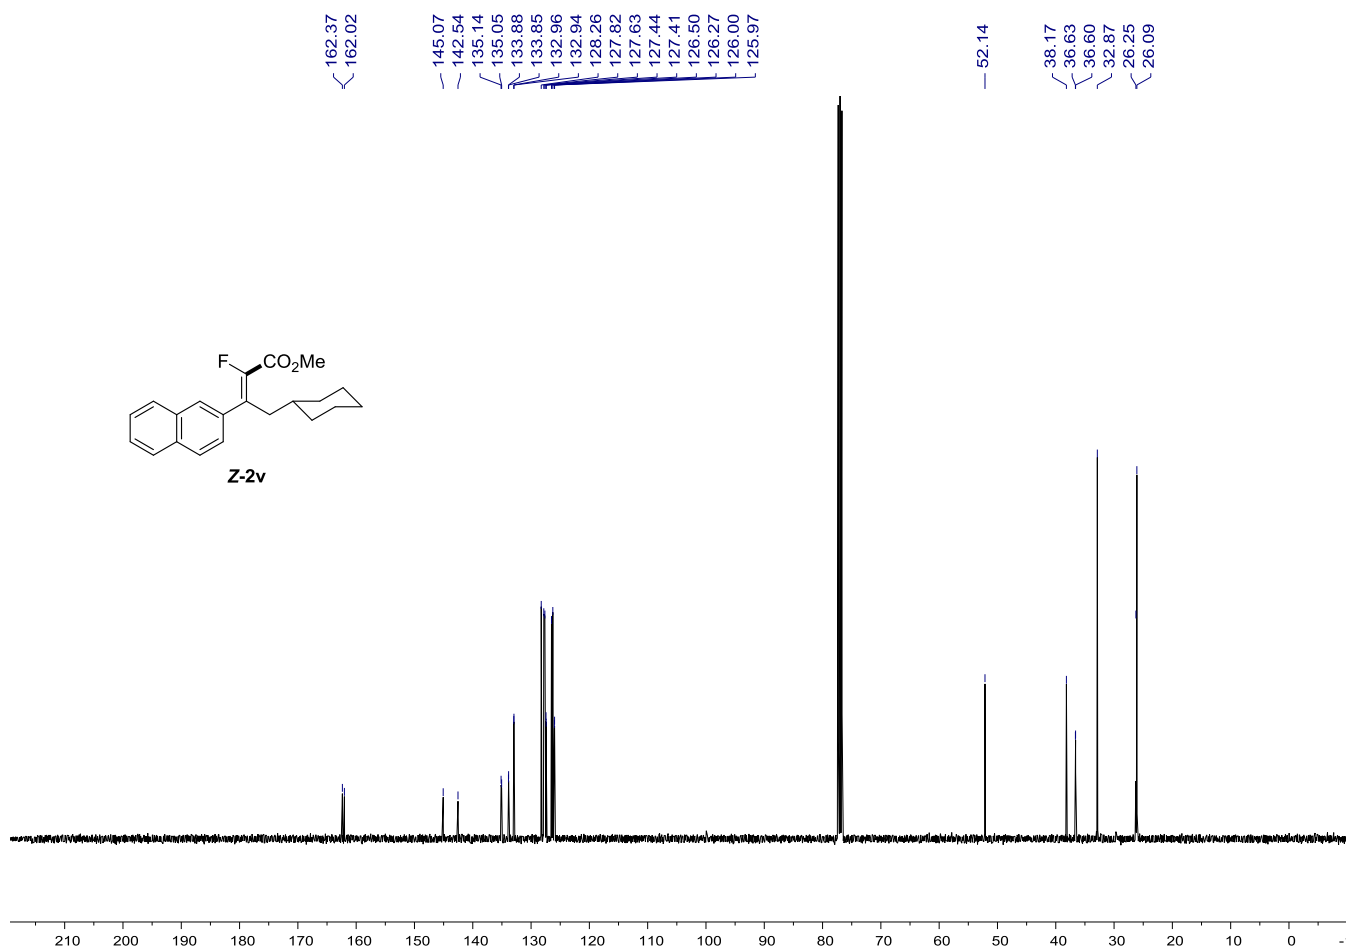

7.87, 7.86, 7.86, 7.85, 7.84, 7.83, 7.82, 7.63, 7.62, 7.51, 7.50, 7.50, 7.49, 7.48, 7.47, 7.29, 7.28, 7.27, 7.26

3.58, 2.56, 2.55, 2.54, 2.53, 1.72, 1.71, 1.68, 1.67, 1.65, 1.65, 1.64, 1.60, 1.58, 1.56, 1.30, 1.29, 1.28, 1.27, 1.26, 1.25, 1.13, 1.13, 1.11, 1.11, 1.09, 1.09, 1.08, 1.08, 1.05, 1.03, 1.03, 1.00

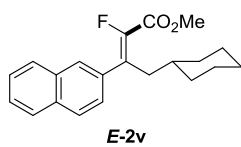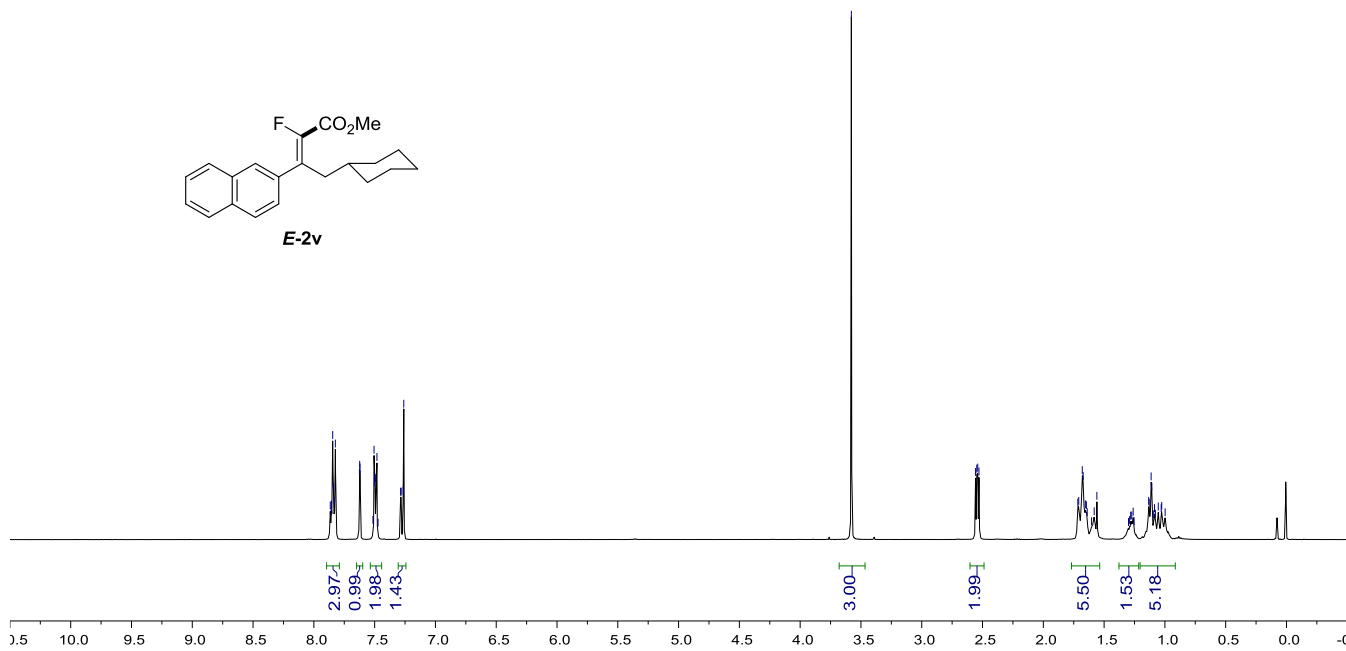

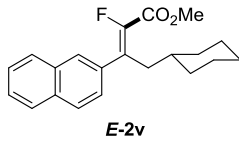

-124.25  
 -124.26  
 -124.27

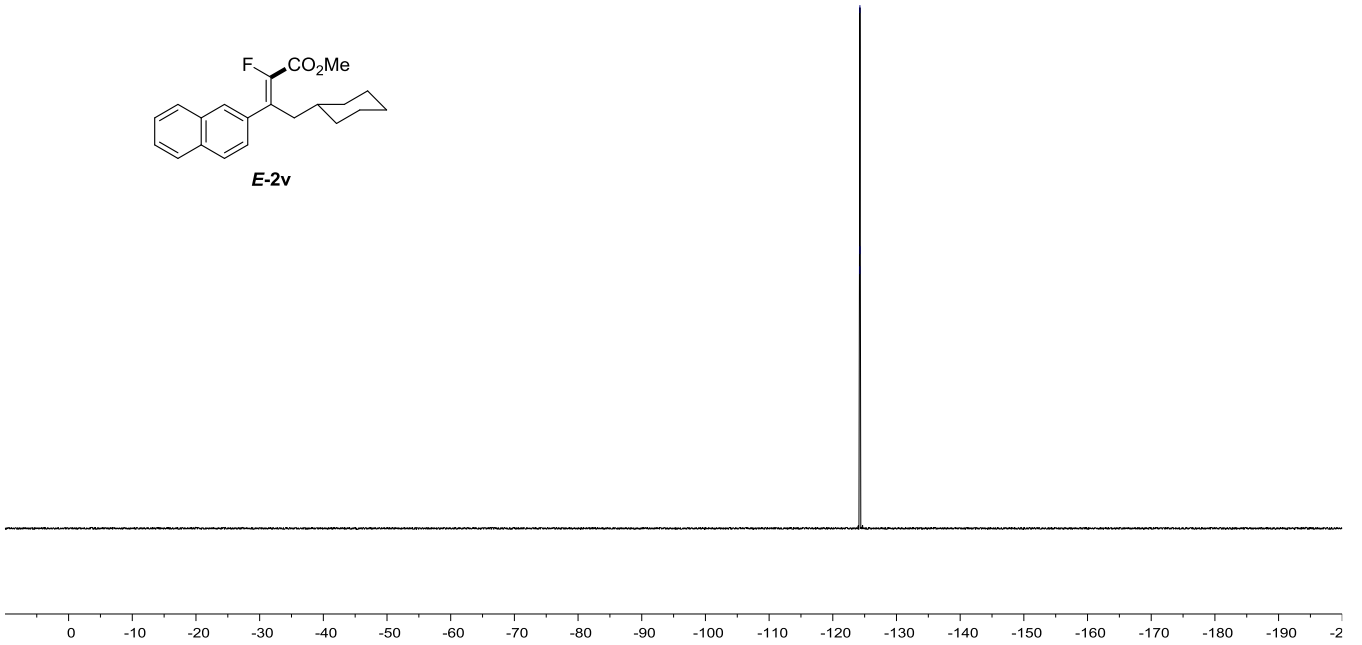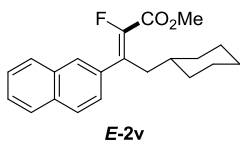

161.30  
160.94

145.91  
 143.39  
 134.97  
 134.81  
 134.76  
 134.70  
 133.00  
 132.73  
 128.03  
 127.73  
 127.52  
 126.49  
 126.46  
 126.36  
 126.33  
 126.15

51.95  
 40.51  
 40.47  
 35.29  
 33.01  
 26.24  
 26.01

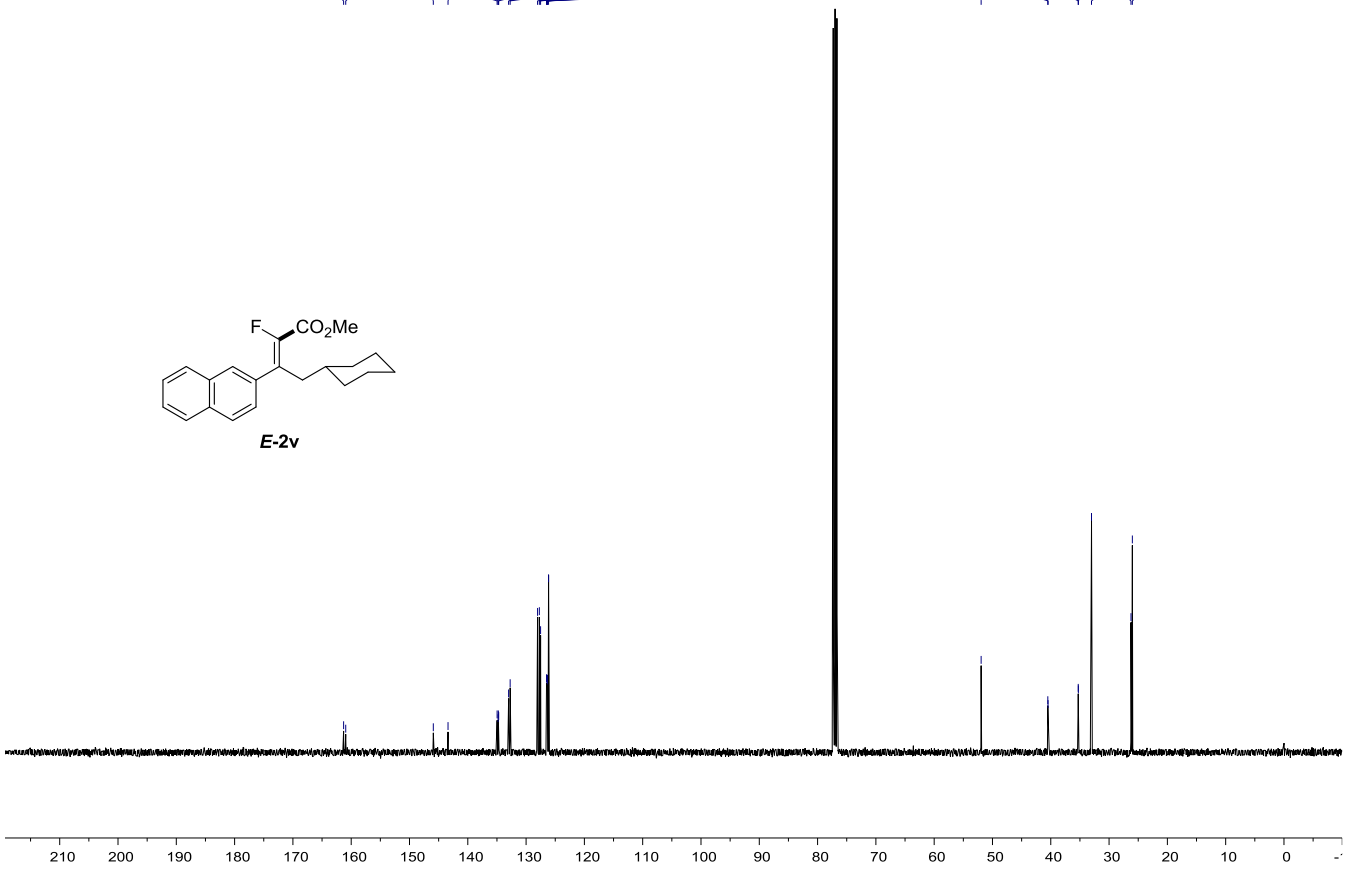

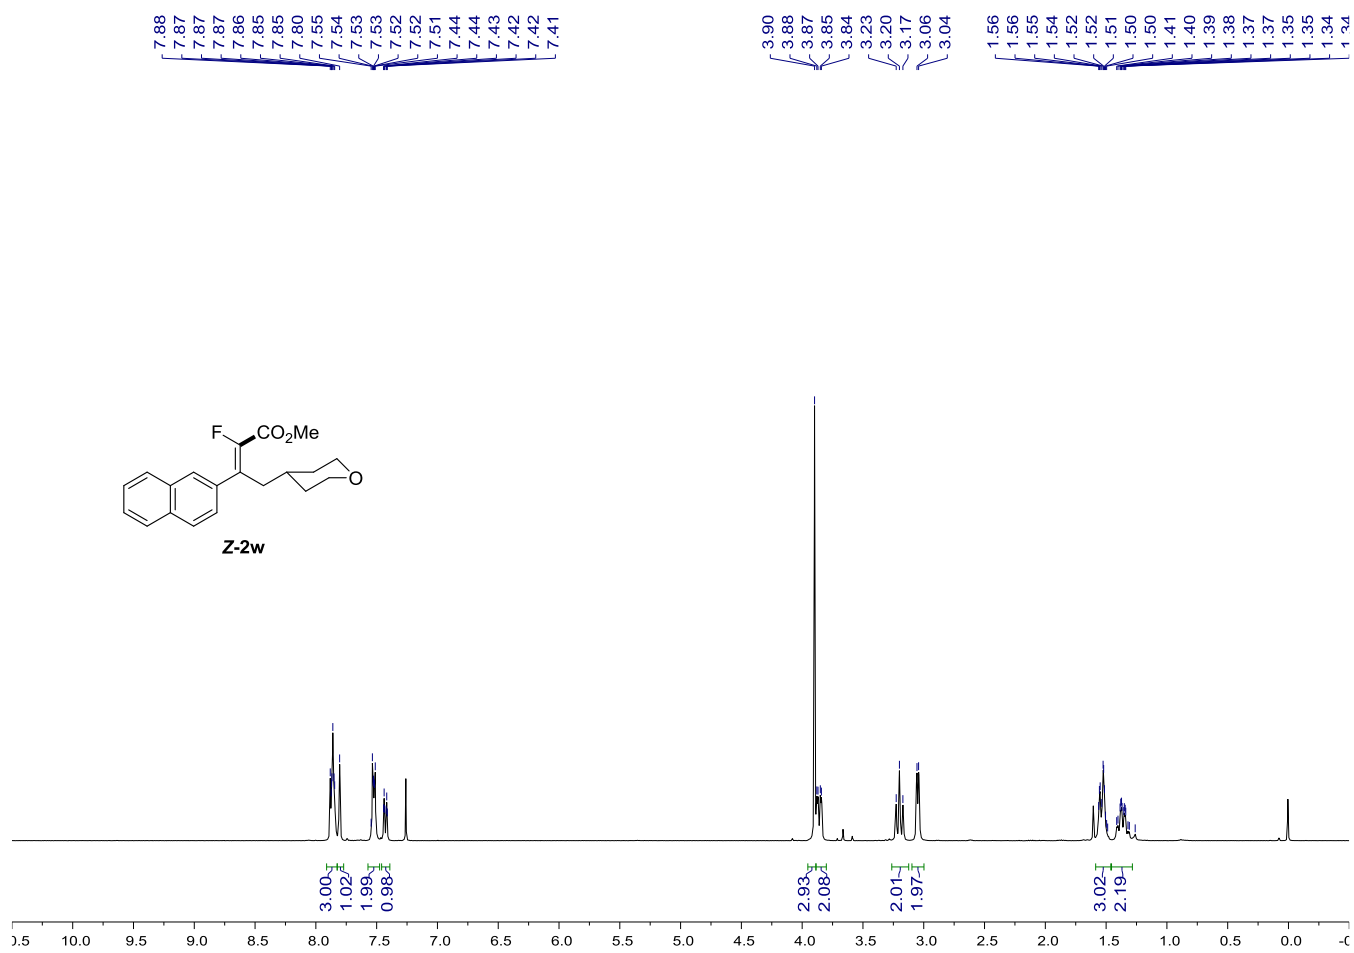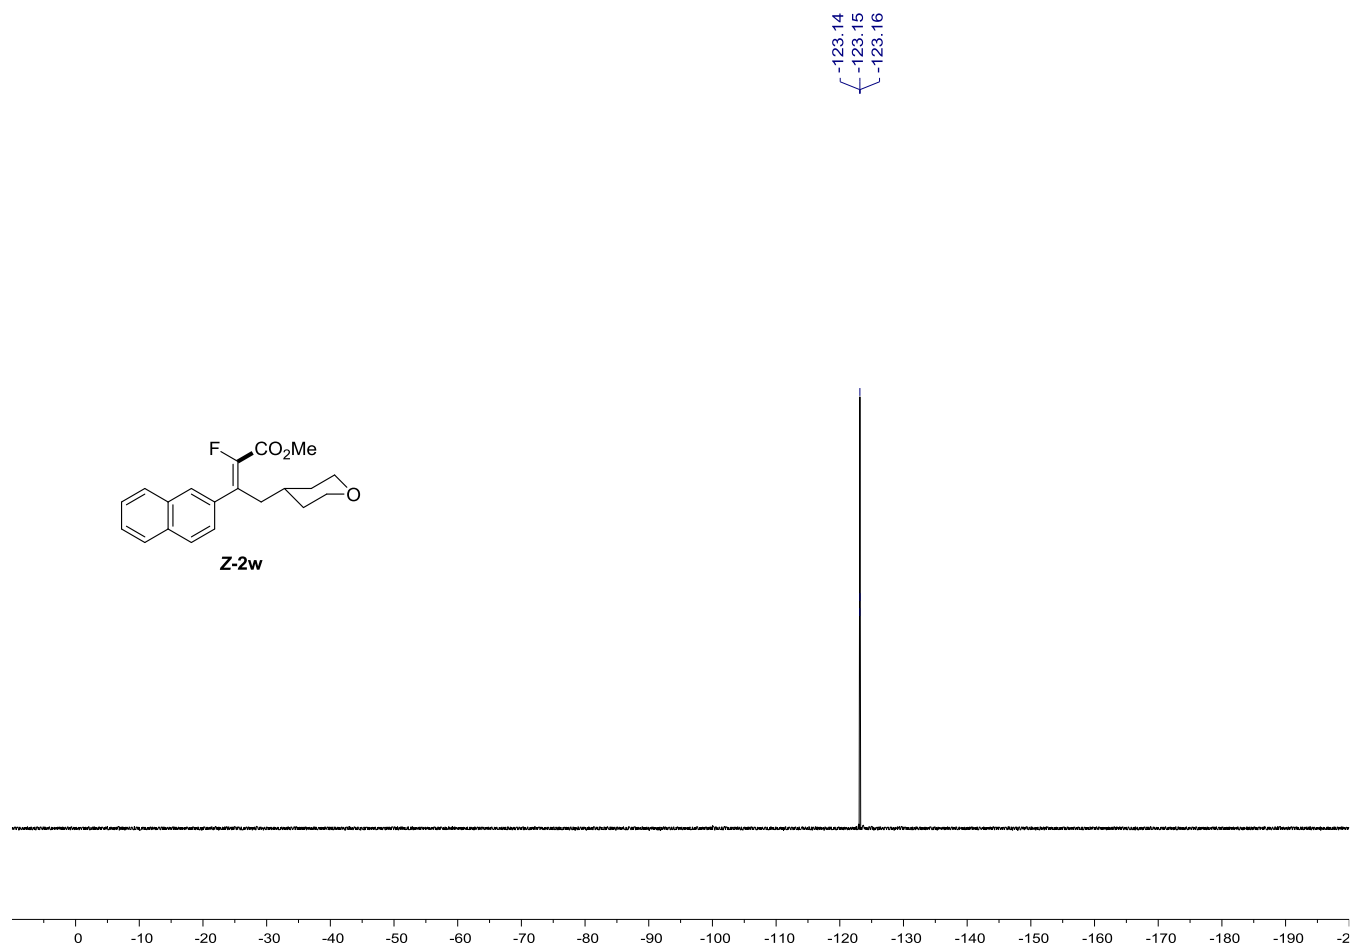

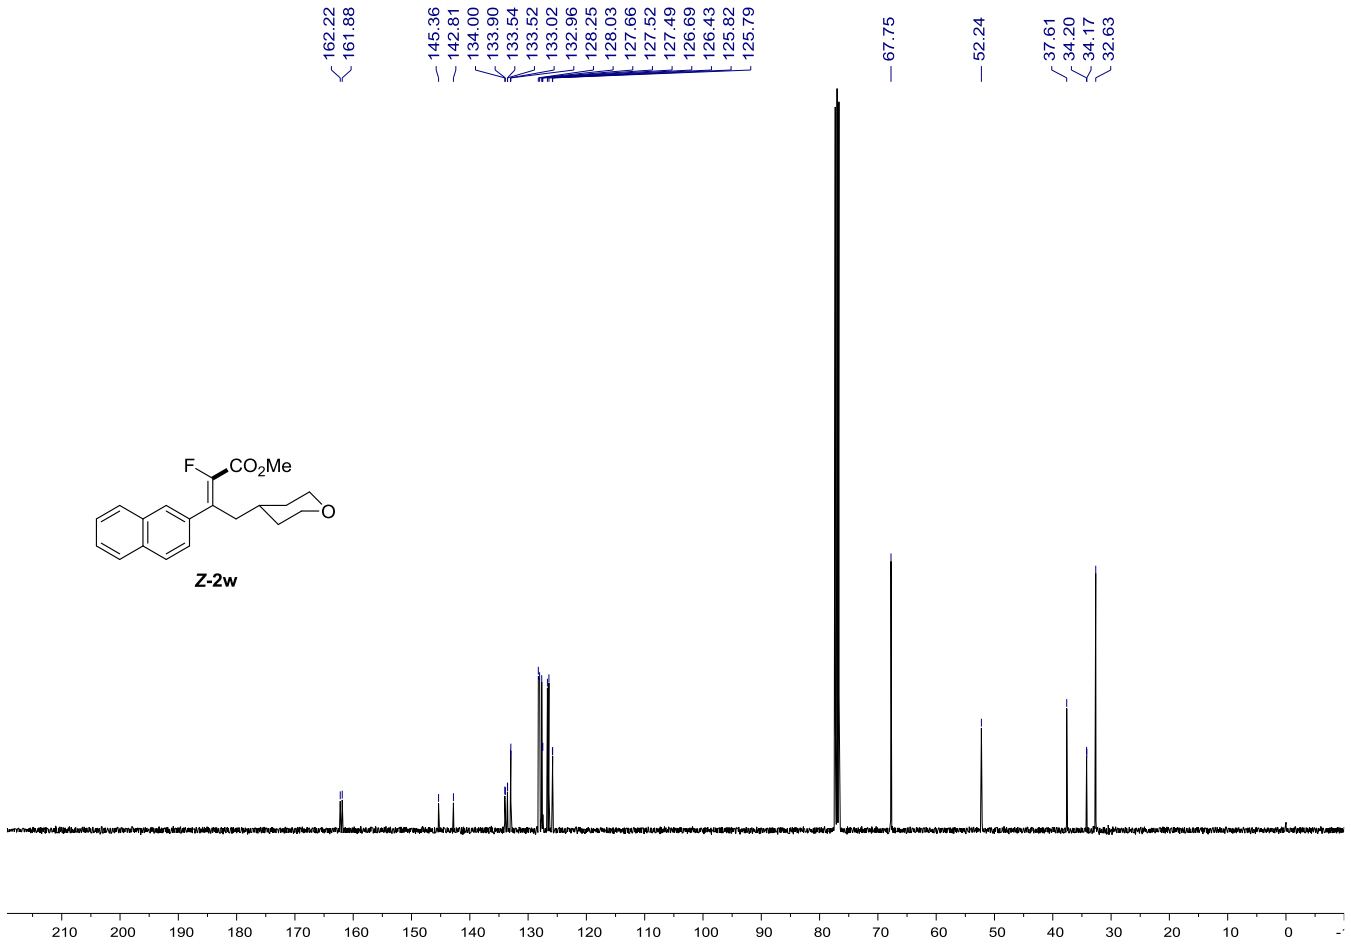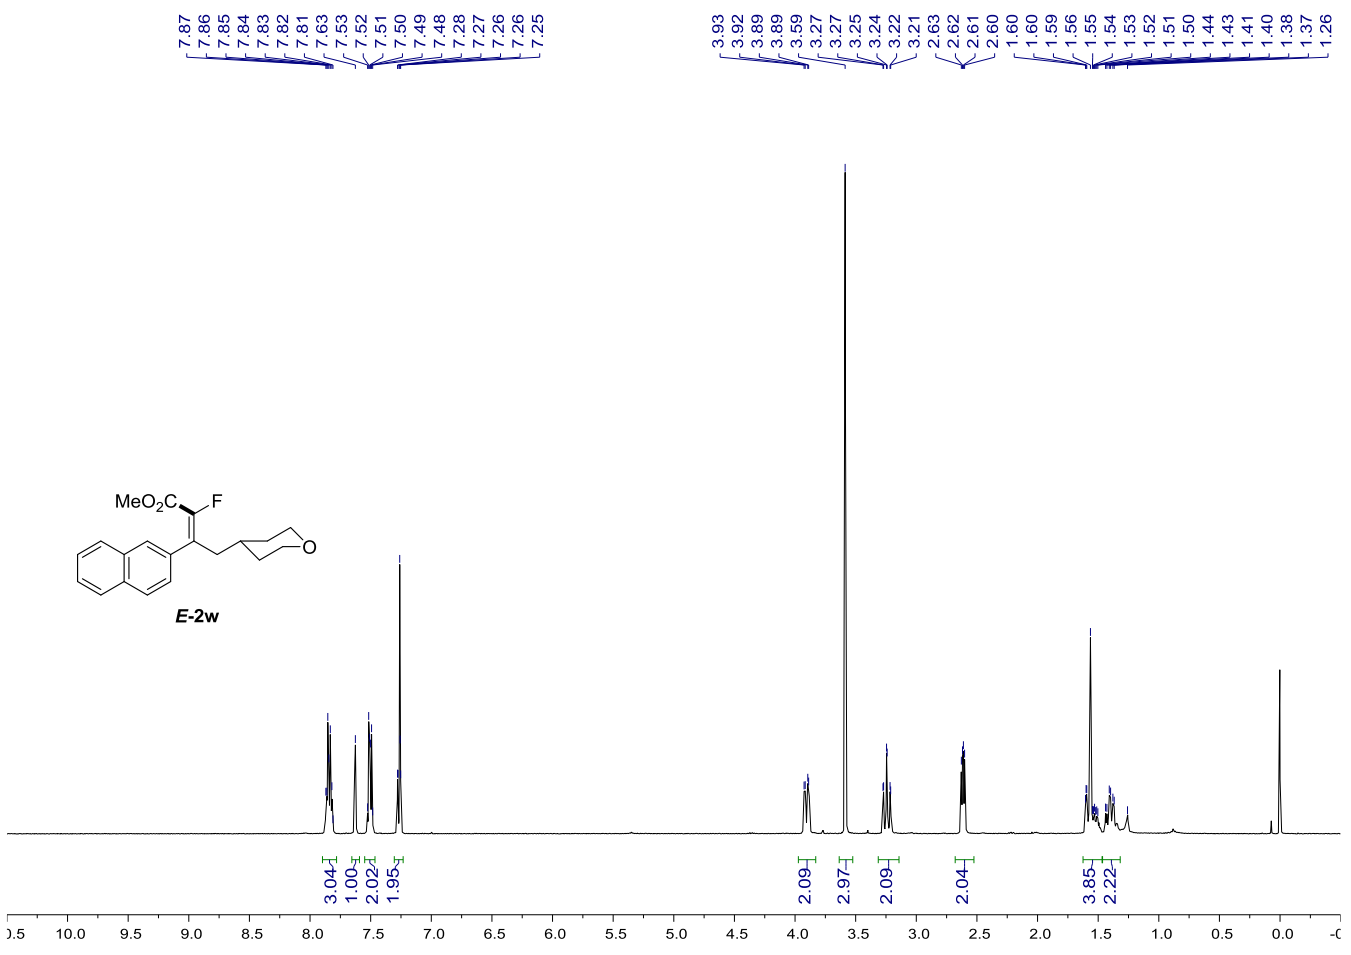

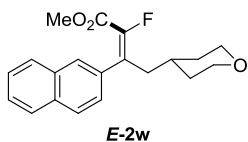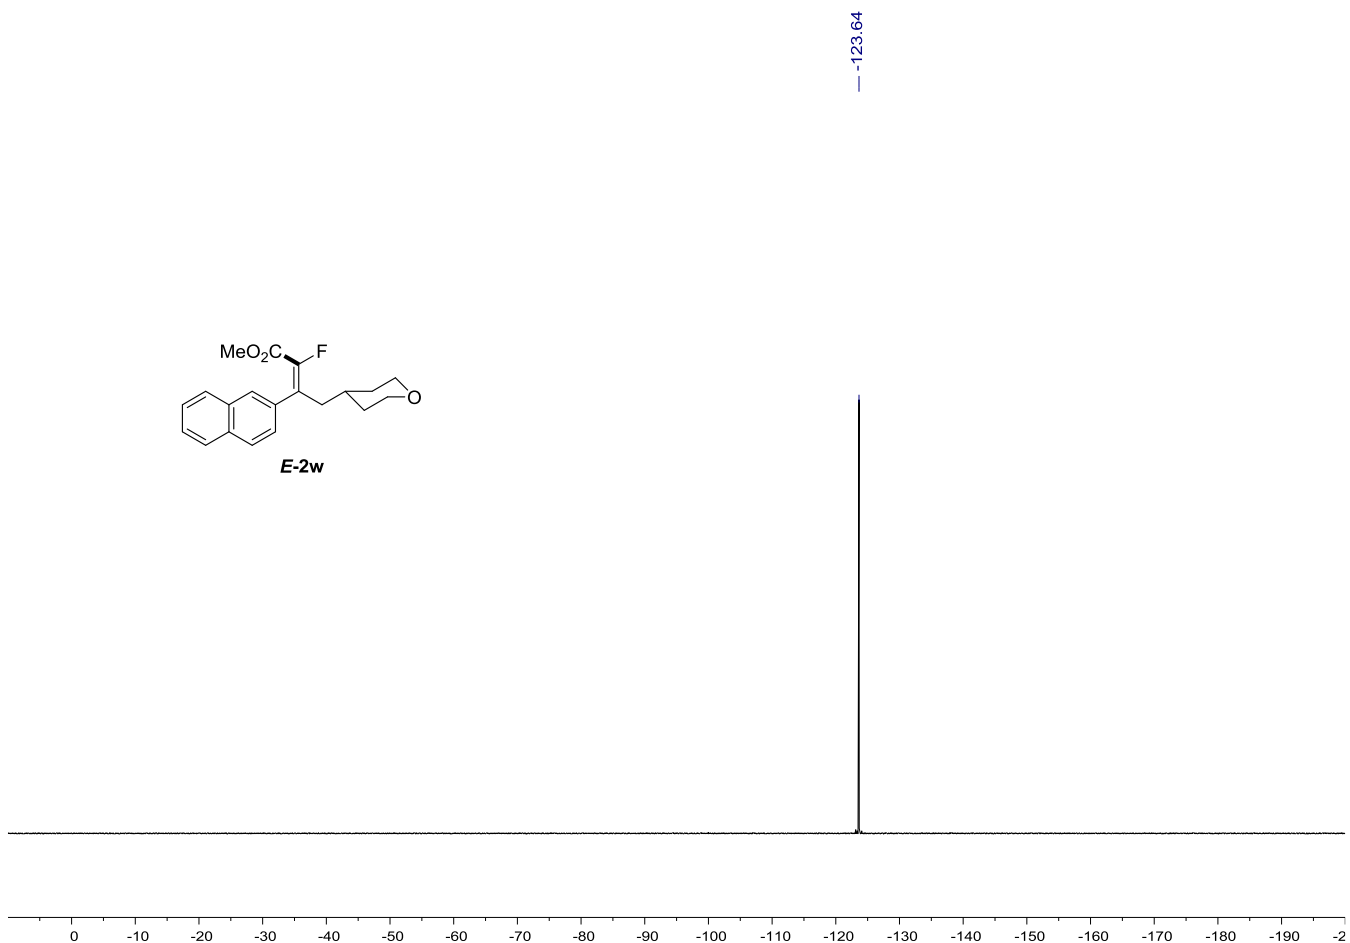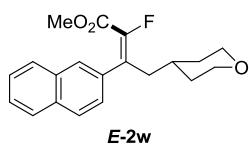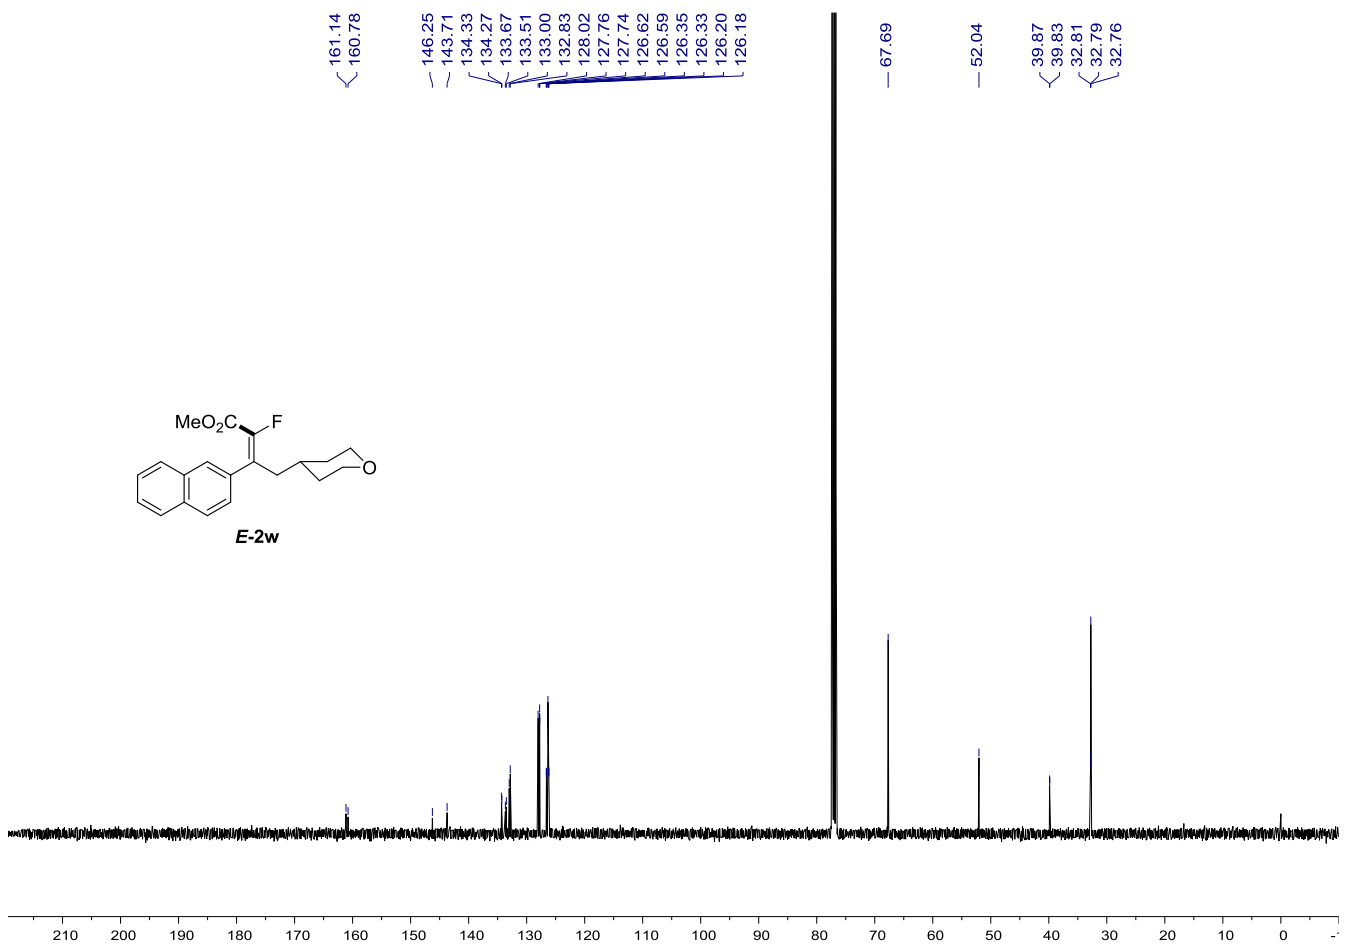

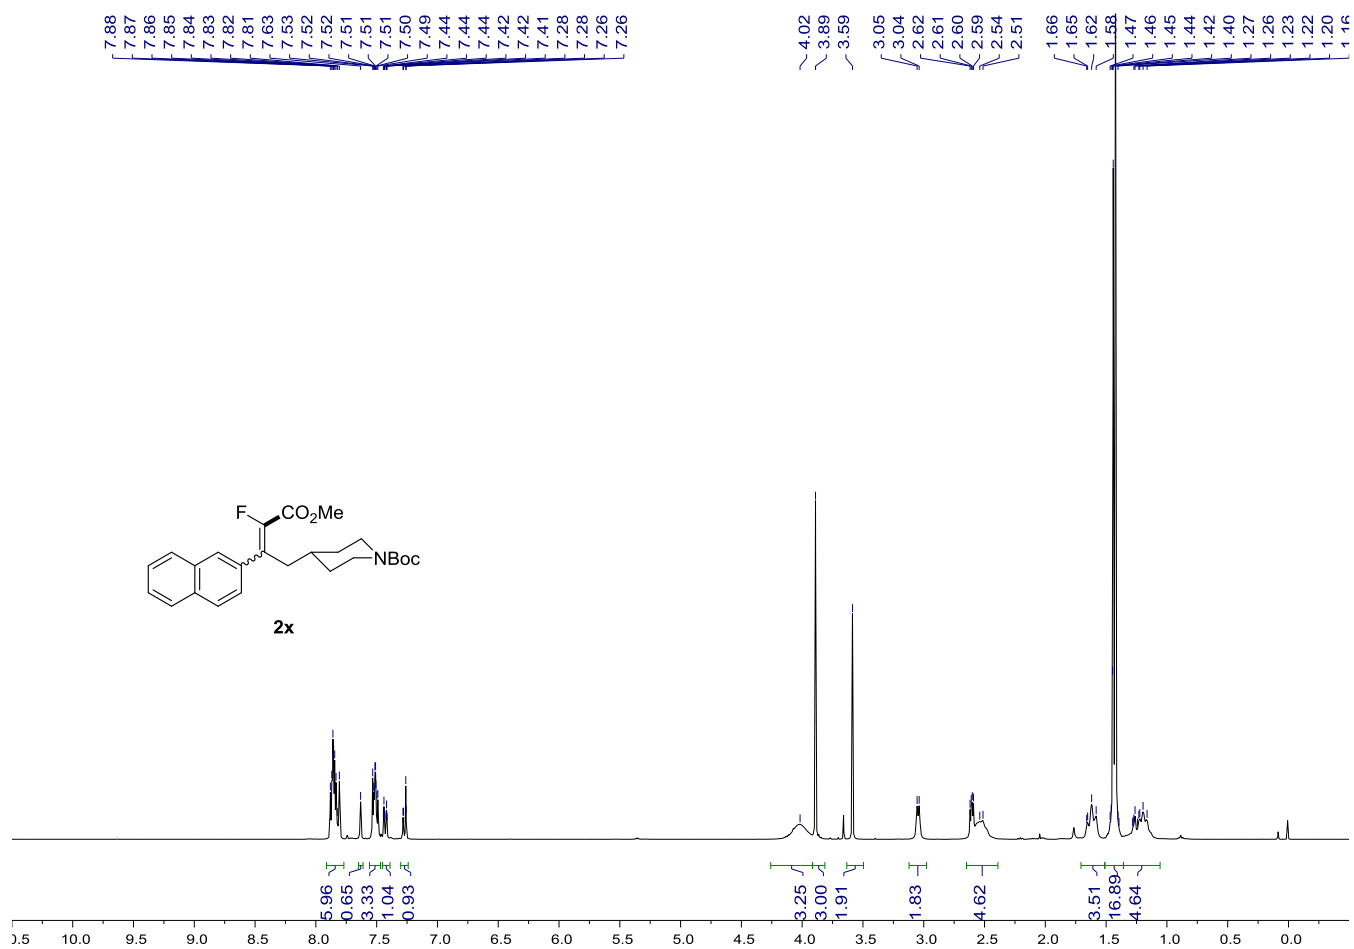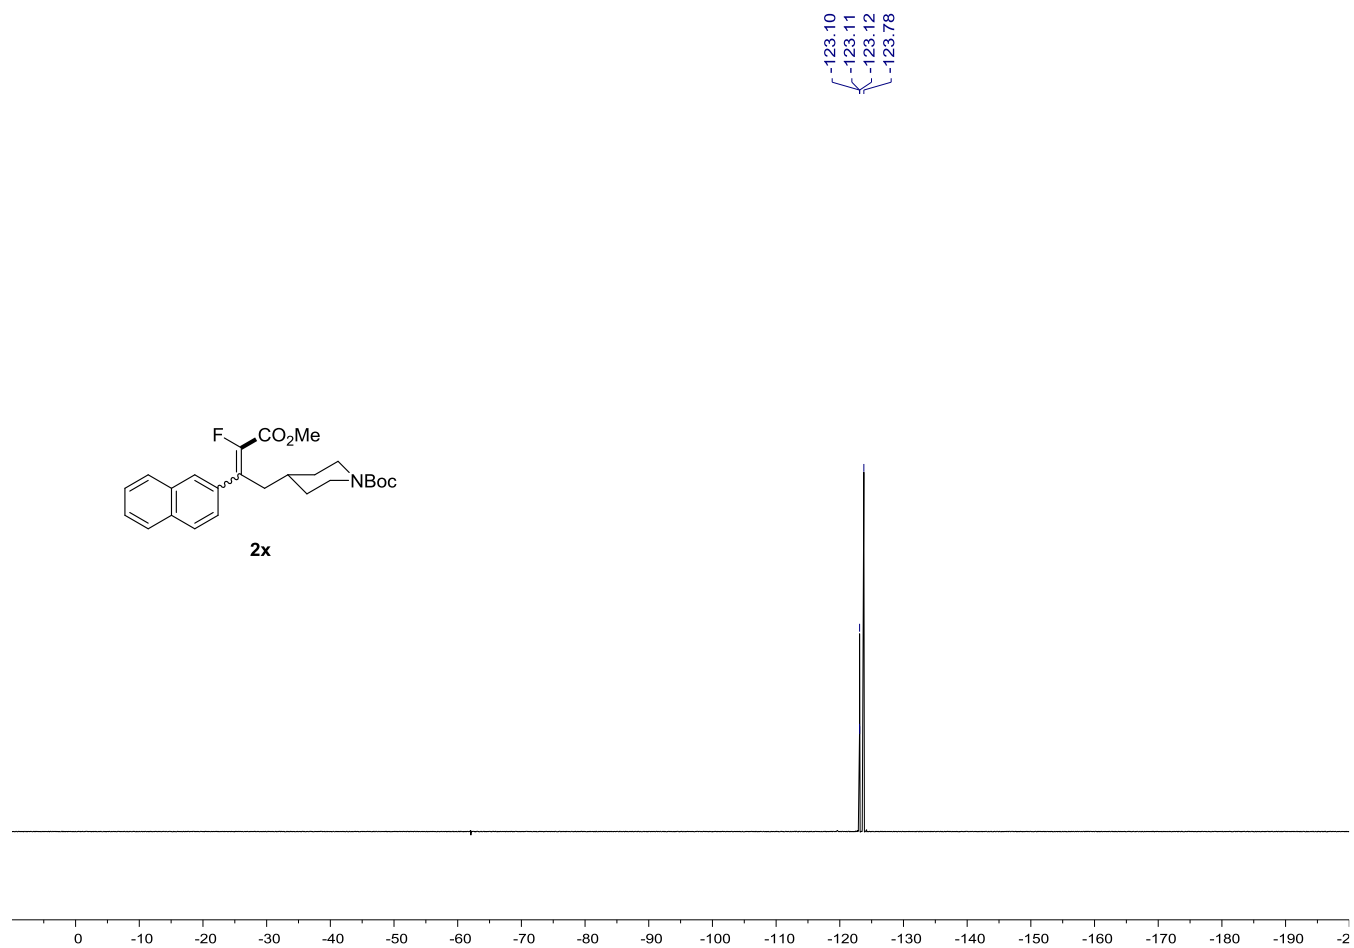

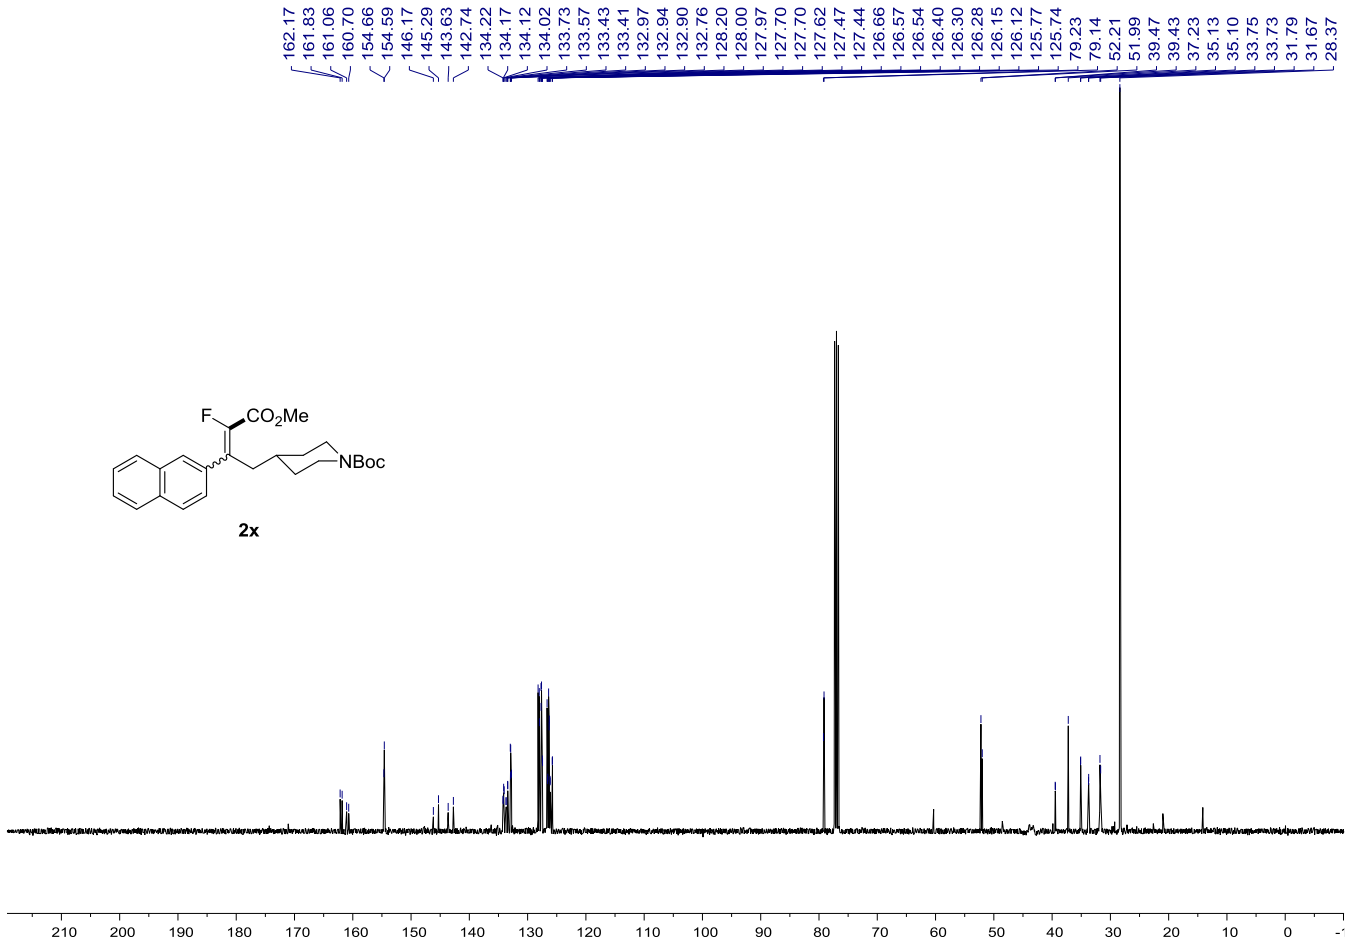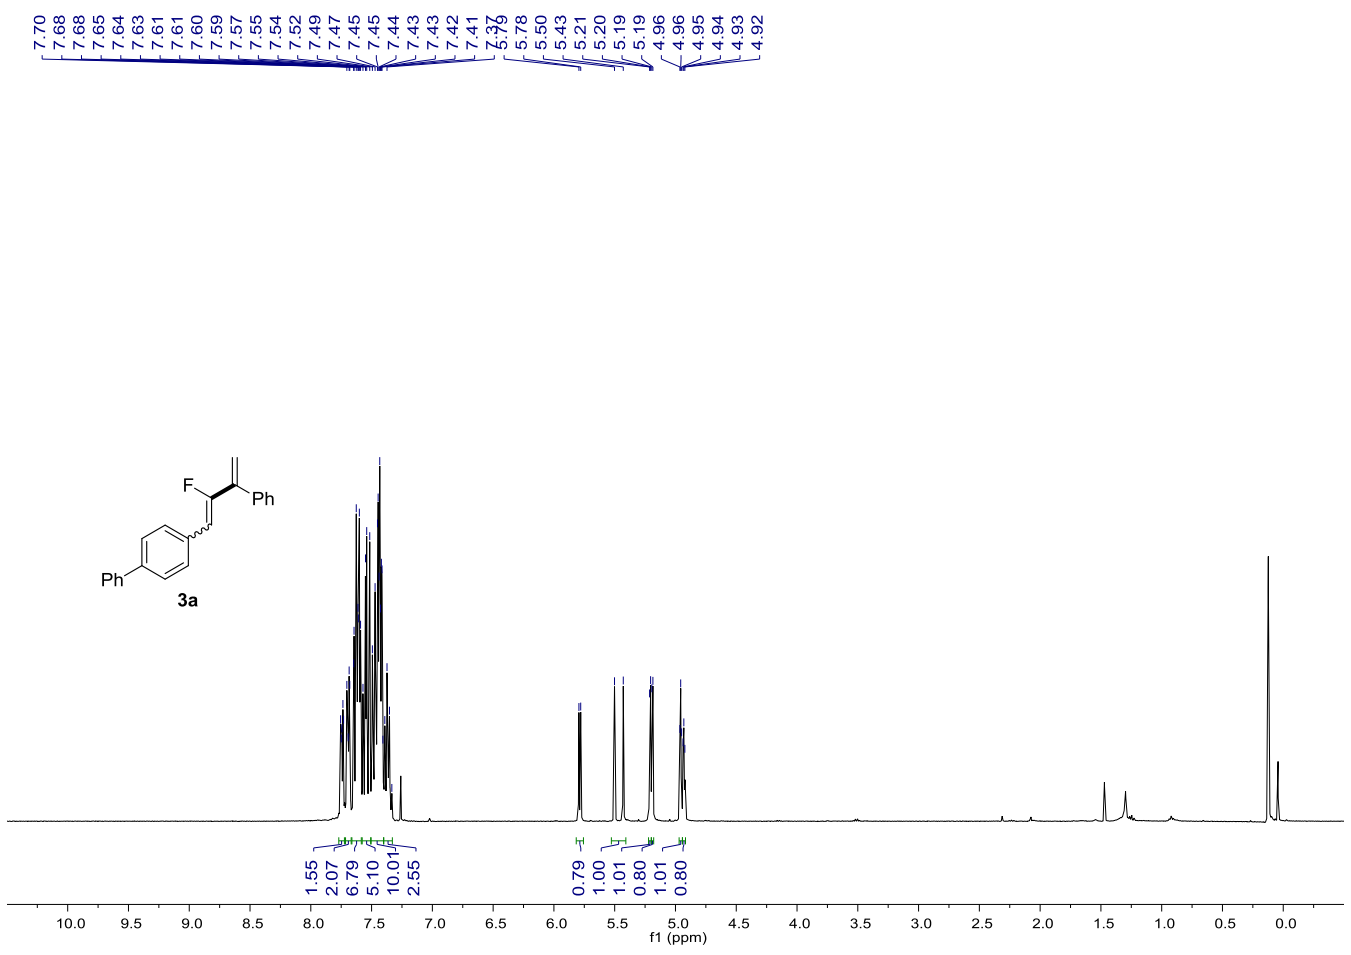

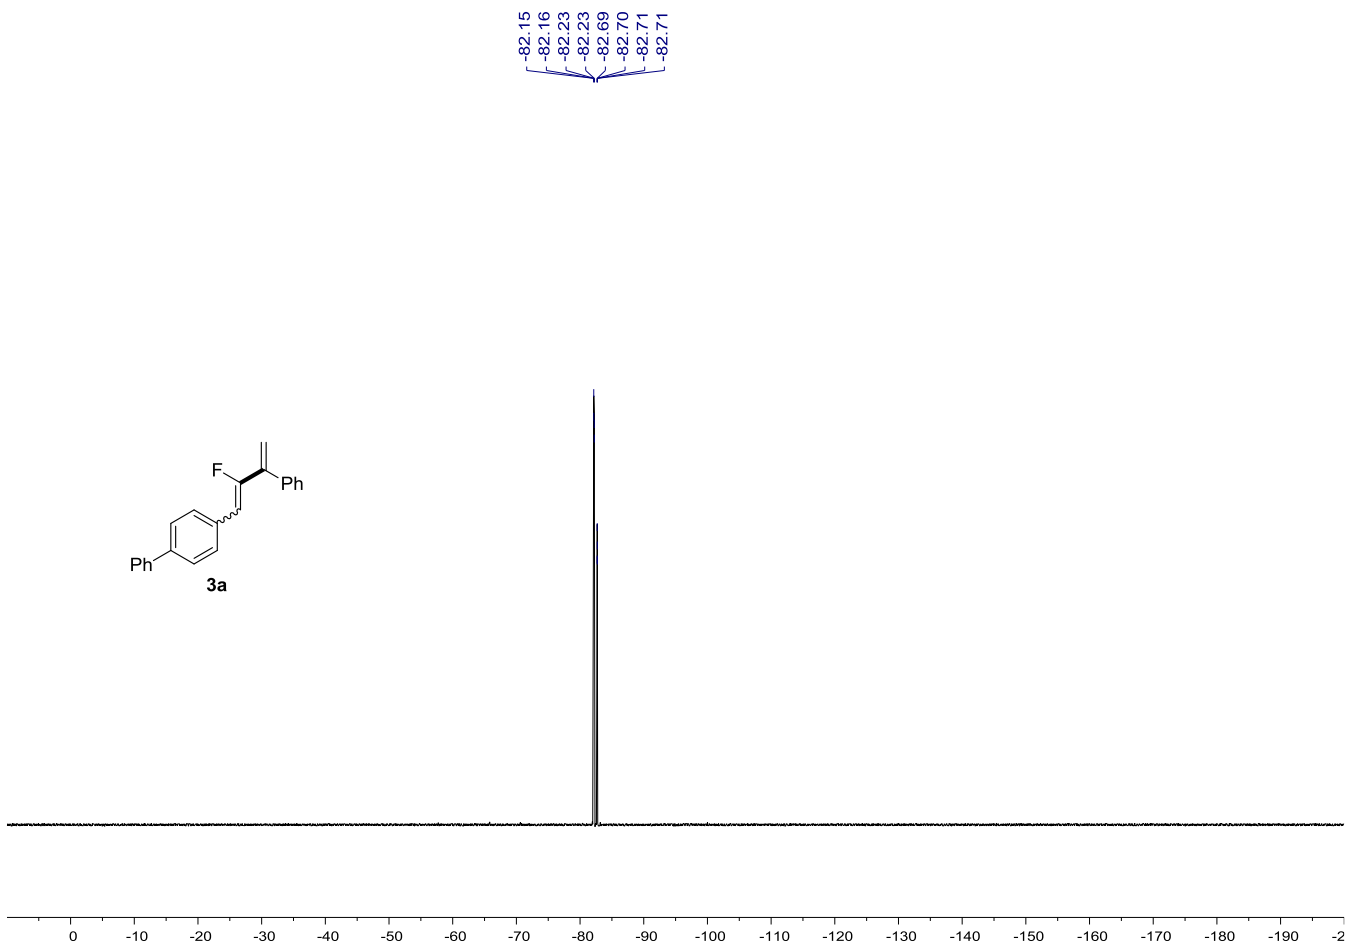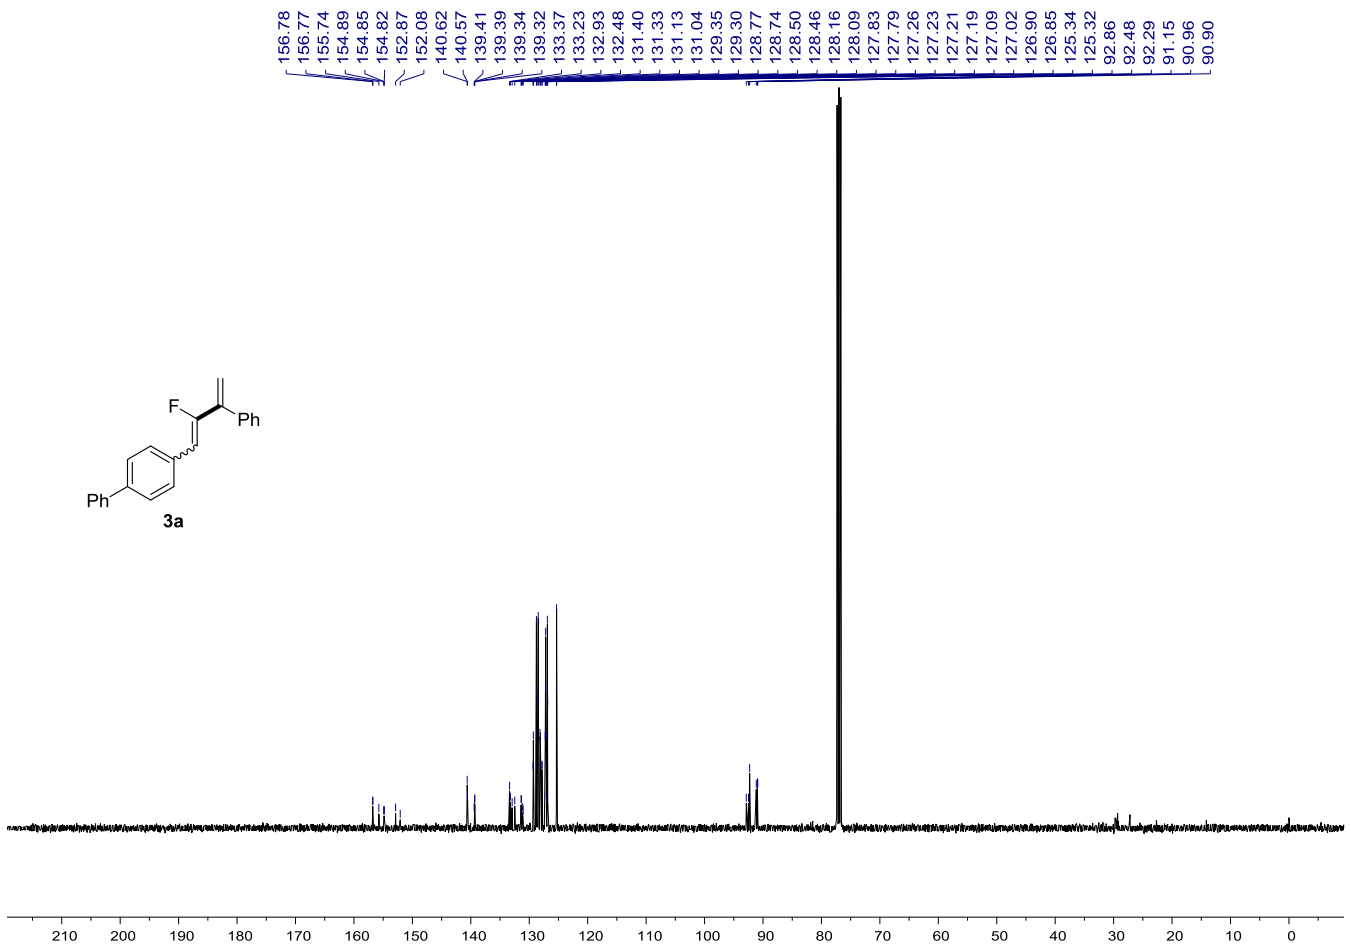



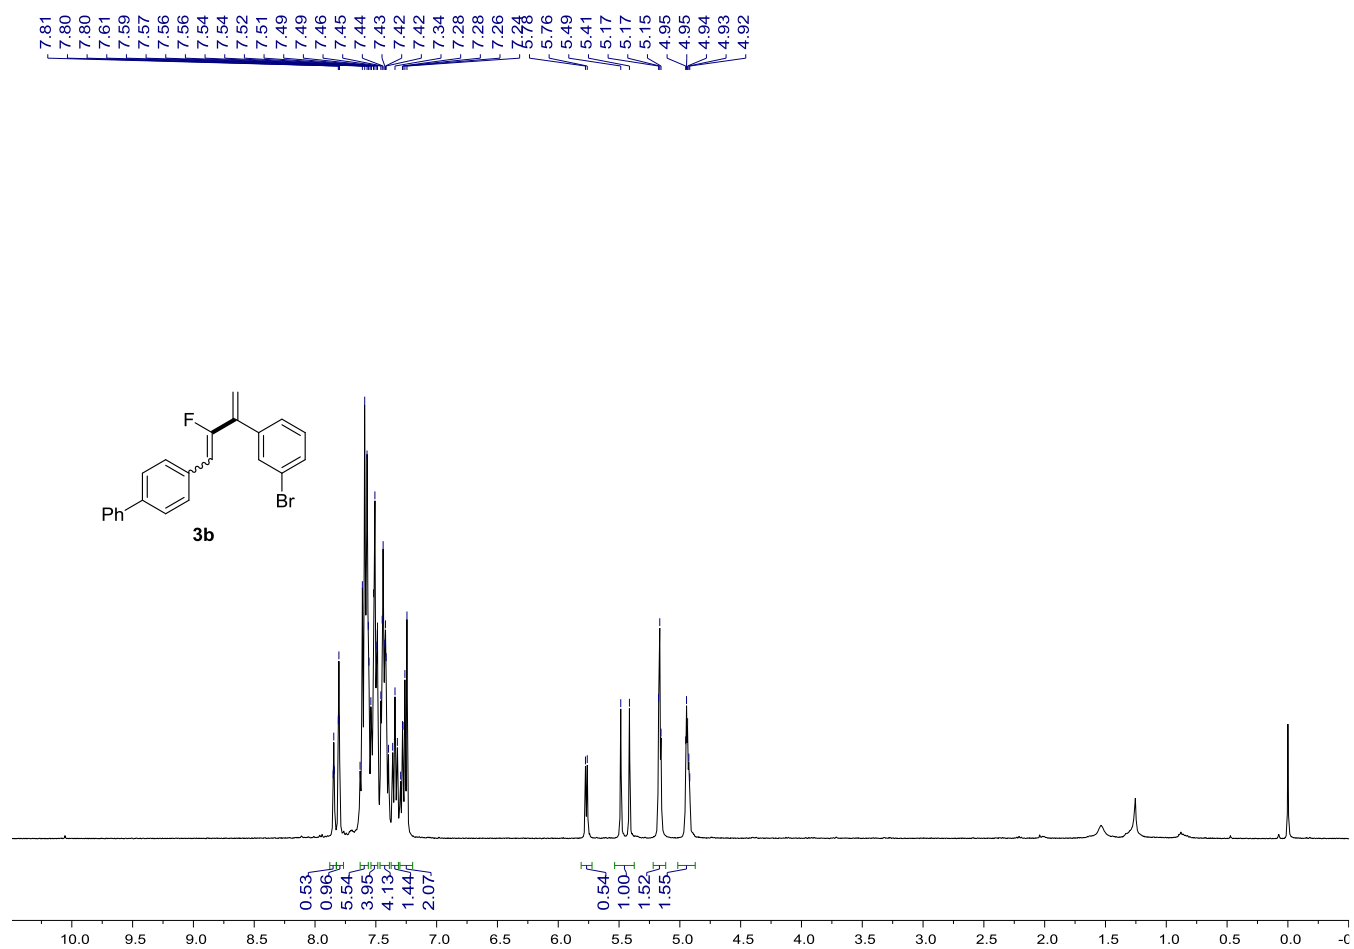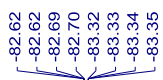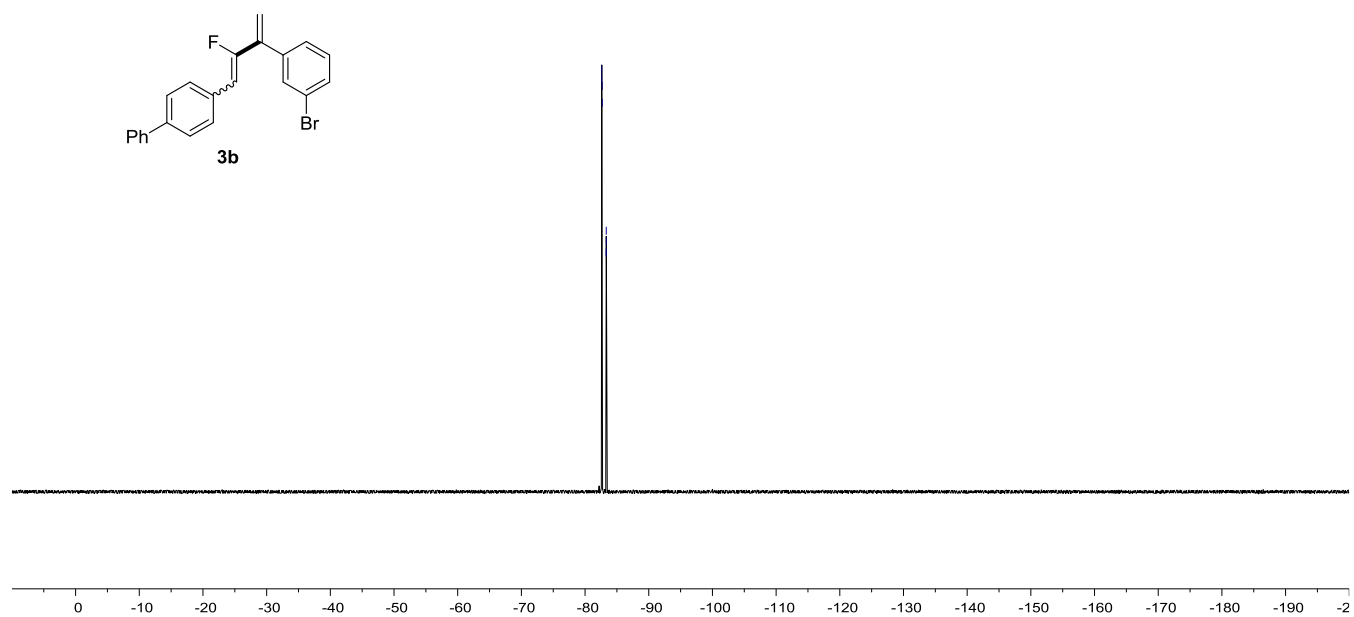

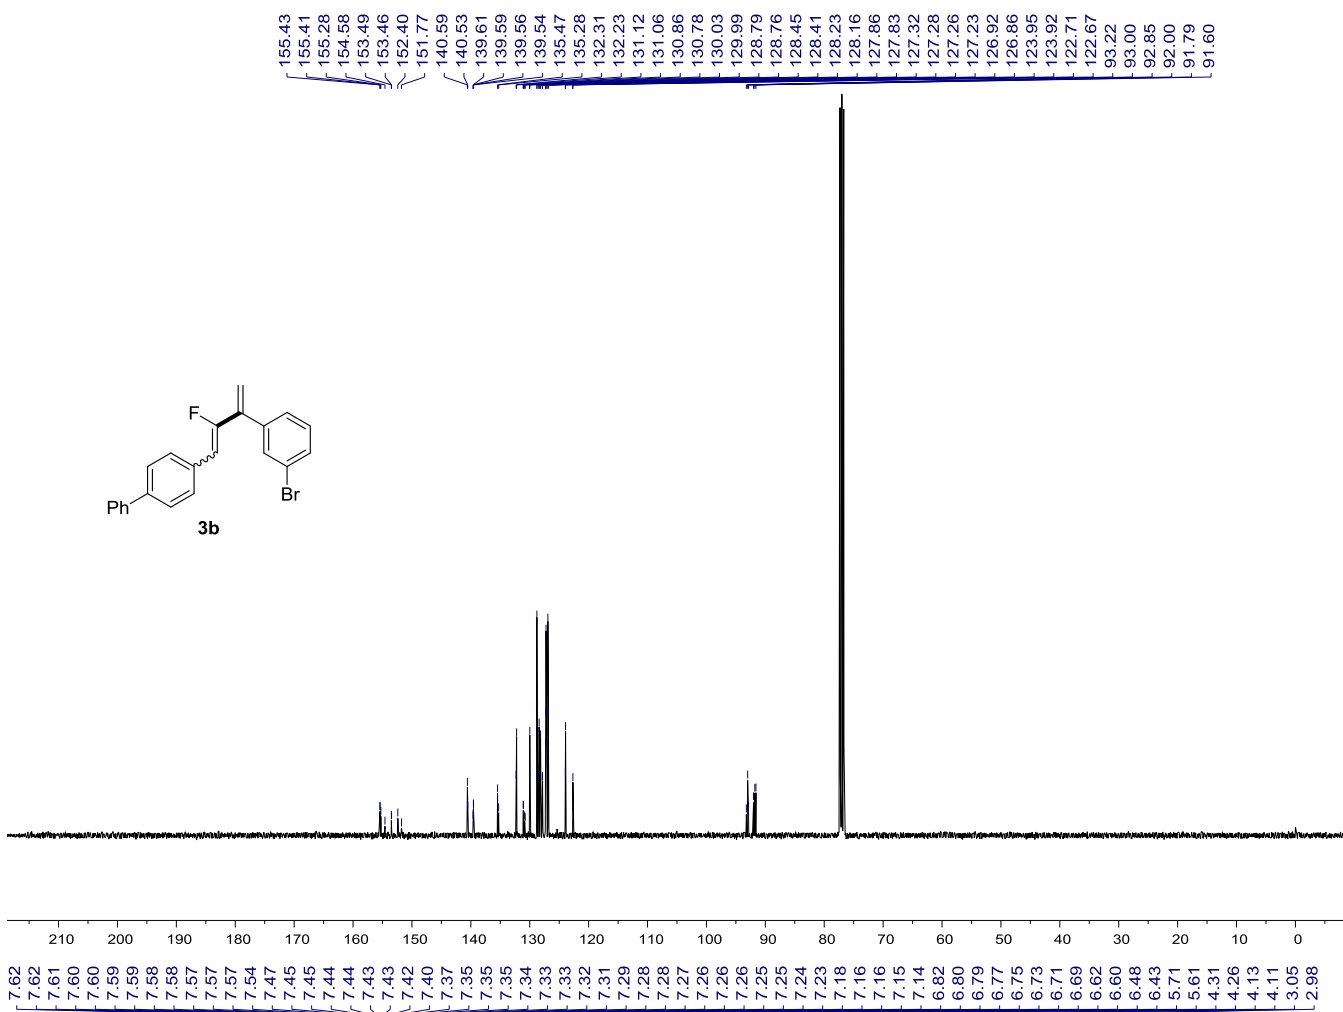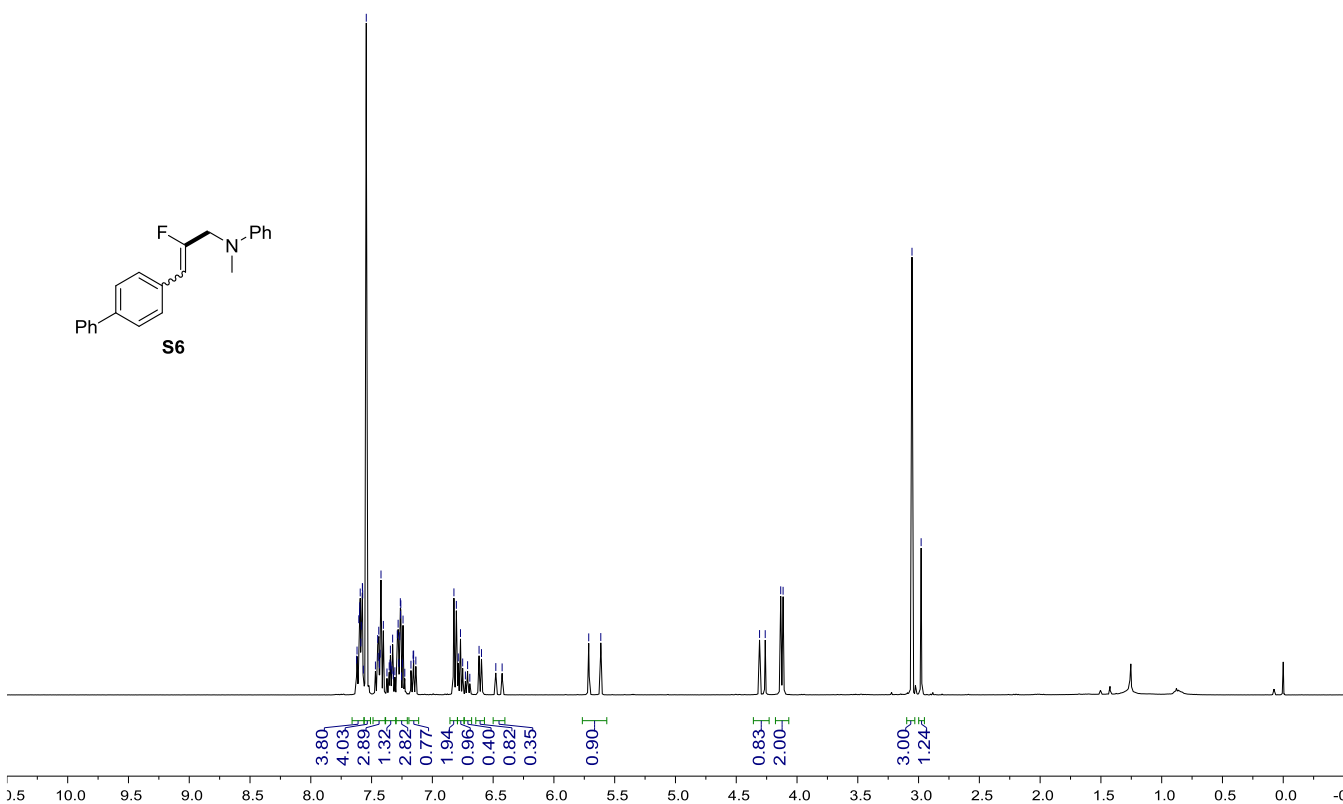

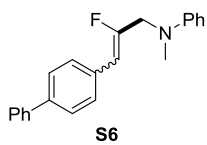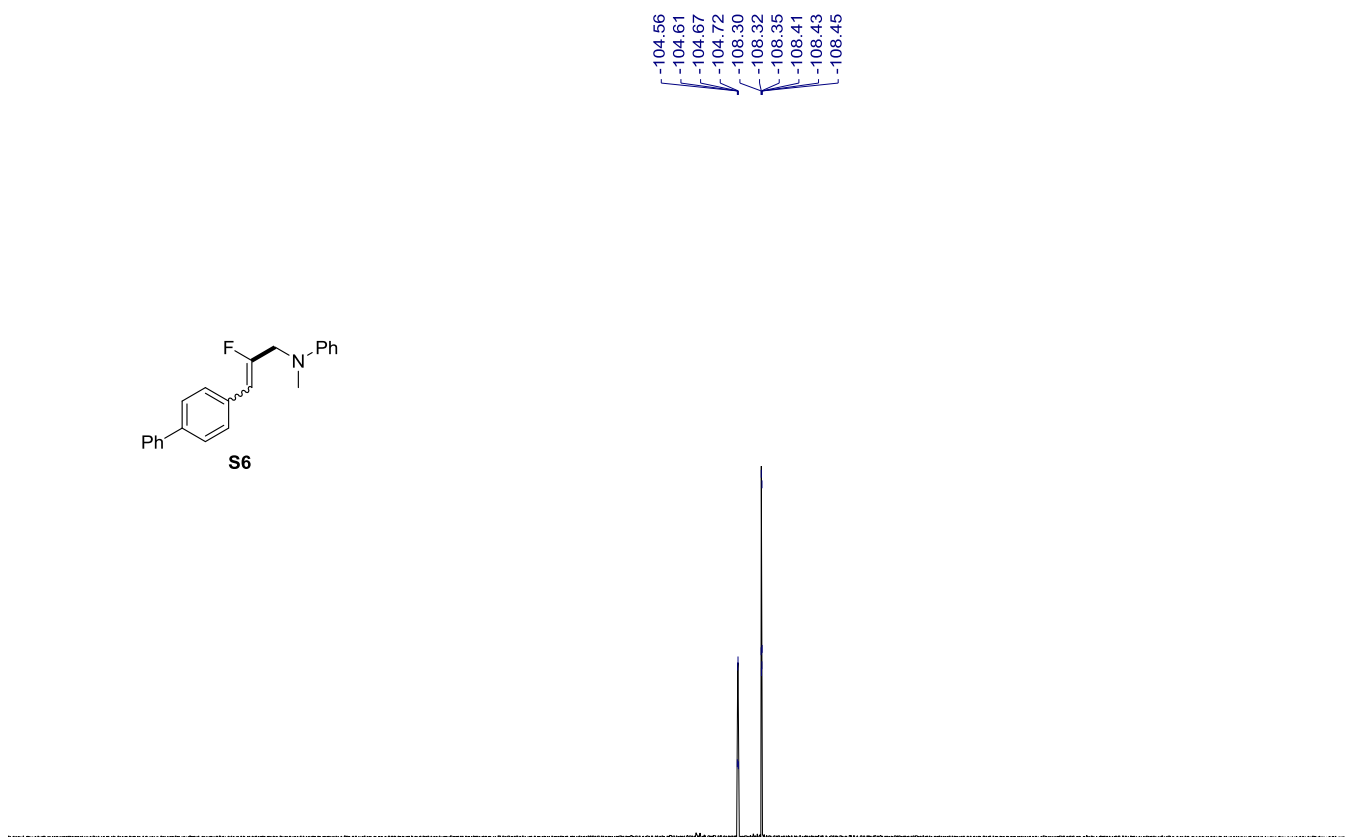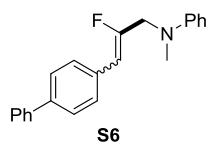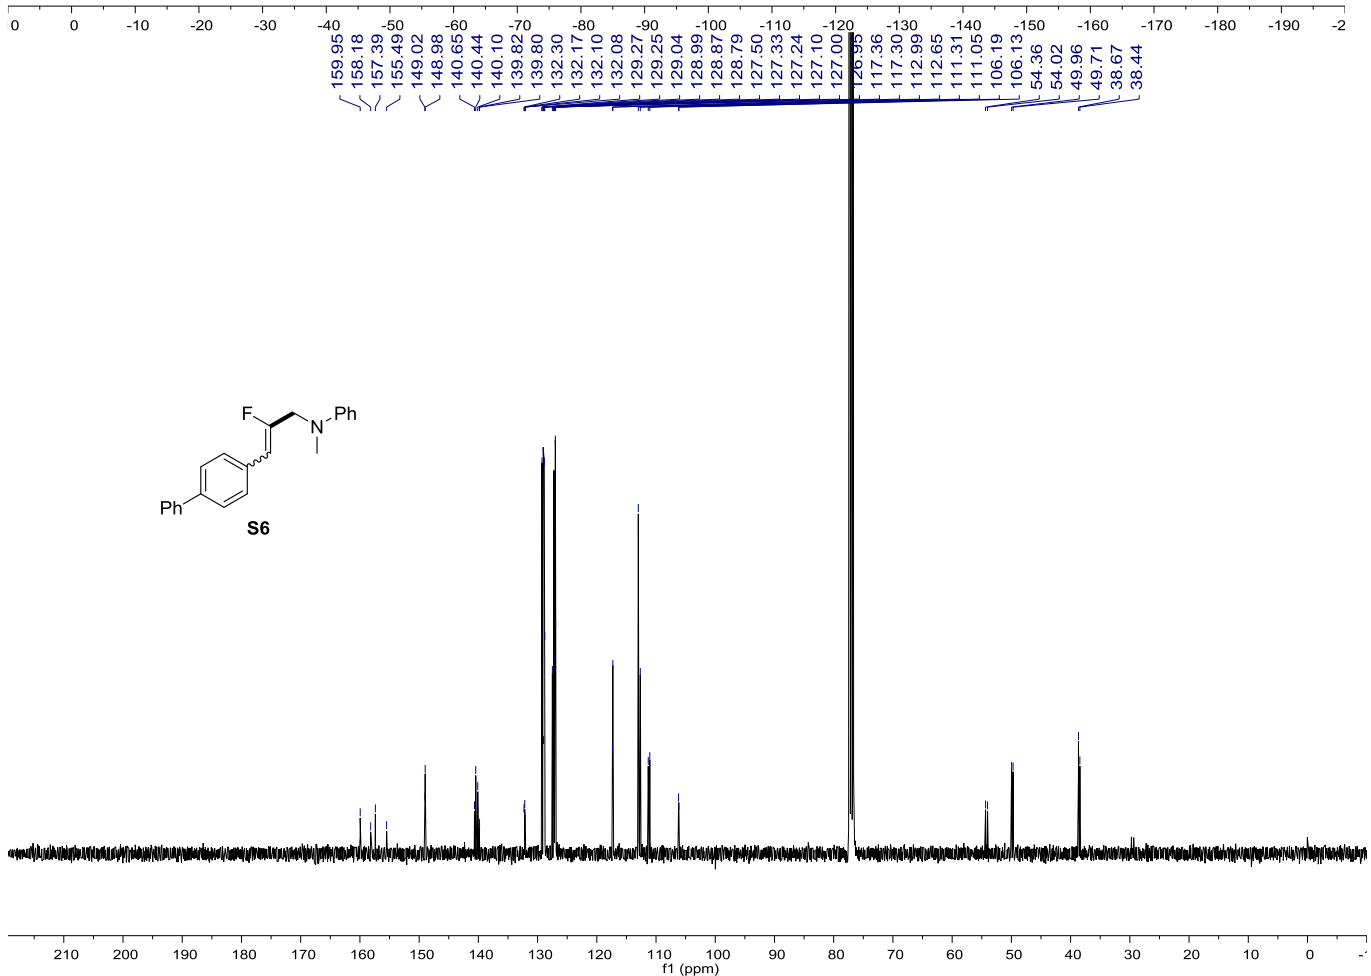

Supplement: c9sc01336a1.pdf [file c9sc01336a1.pdf]
